# Supplementary material for: Neuroprotective mushrooms
Source: publisher site journal article supplement (doi:10.1515/nipt-2024-0004), 2024-03-05
Supplement: Supplementary file 1 [file j_nipt-2024-0004_suppl_002.xlsx]

## Sheet: ClueGO Results_Agarikon
ID	Term	Ontology Source	Term PValue	Term PValue Corrected with Bonferroni step down	Group PValue	Group PValue Corrected with Bonferroni step down	GOLevels	GOGroups	% Associated Genes	Nr. Genes	Associated Genes Found
GO:0098632	cell-cell adhesion mediator activity	GO_BiologicalProcess-EBI-UniProt-GOA-ACAP-ARAP_25.05.2022_00h00	0.000363507	0.00290806	0.000363507	0.00109052	[4]	Group0	5.26316	3	[ANXA2, DSP, RAB10]
GO:0014068	positive regulation of phosphatidylinositol 3-kinase signaling	GO_BiologicalProcess-EBI-UniProt-GOA-ACAP-ARAP_25.05.2022_00h00	2.48889e-06	0.000141867	1.55866e-05	6.23465e-05	[5, 6, 7, 8, 9, 10]	Group2	5.61798	5	[CAT, FLT3, KDR, KIT, PDGFRA]
GO:0043552	positive regulation of phosphatidylinositol 3-kinase activity	GO_BiologicalProcess-EBI-UniProt-GOA-ACAP-ARAP_25.05.2022_00h00	7.73292e-05	0.00201056	1.55866e-05	6.23465e-05	[5, 6, 7, 8, 9, 10, 11, 12]	Group2	8.82353	3	[FLT3, KIT, PDGFRA]
GO:0005021	vascular endothelial growth factor receptor activity	GO_BiologicalProcess-EBI-UniProt-GOA-ACAP-ARAP_25.05.2022_00h00	1.1331e-06	6.68527e-05	1.55866e-05	6.23465e-05	[7, 8, 9, 10, 11]	Group2	33.3333	3	[FLT3, KDR, PDGFRA]
GO:0034308	primary alcohol metabolic process	GO_BiologicalProcess-EBI-UniProt-GOA-ACAP-ARAP_25.05.2022_00h00	8.77628e-06	0.000430038	2.12197e-07	1.06098e-06	[4, 5]	Group3	4.34783	5	[ALDH1A1, ALDH1A2, ALDH1B1, ALDH2, ALDH3B1]
GO:0046164	alcohol catabolic process	GO_BiologicalProcess-EBI-UniProt-GOA-ACAP-ARAP_25.05.2022_00h00	1.28698e-05	0.000579141	2.12197e-07	1.06098e-06	[4, 5]	Group3	6.77966	4	[ALDH1B1, ALDH2, ALDH3B1, TPI1]
GO:0006068	ethanol catabolic process	GO_BiologicalProcess-EBI-UniProt-GOA-ACAP-ARAP_25.05.2022_00h00	3.83151e-06	0.000206901	2.12197e-07	1.06098e-06	[6, 7]	Group3	23.0769	3	[ALDH1B1, ALDH2, ALDH3B1]
GO:0045109	intermediate filament organization	GO_BiologicalProcess-EBI-UniProt-GOA-ACAP-ARAP_25.05.2022_00h00	2.1191e-08	1.35623e-06	2.97473e-08	1.78484e-07	[4, 5, 7]	Group4	8.33333	6	[DSP, KRT31, KRT78, KRT81, KRT83, KRT86]
GO:0043878	glyceraldehyde-3-phosphate dehydrogenase (NAD+) (non-phosphorylating) activity	GO_MolecularFunction-EBI-UniProt-GOA-ACAP-ARAP_25.05.2022_00h00	1.08636e-09	7.27863e-08	2.12197e-07	1.06098e-06	[5]	Group3	57.1429	4	[ALDH1A1, ALDH1B1, ALDH2, ALDH9A1]
GO:0004029	aldehyde dehydrogenase (NAD+) activity	GO_MolecularFunction-EBI-UniProt-GOA-ACAP-ARAP_25.05.2022_00h00	7.53771e-13	5.5779e-11	2.12197e-07	1.06098e-06	[6]	Group3	40	6	[ALDH1A1, ALDH1A2, ALDH1B1, ALDH2, ALDH3B1, ALDH9A1]
KEGG:05221	Acute myeloid leukemia	KEGG_25.05.2022	0.000585045	0.00117009	1.55866e-05	6.23465e-05	[-1]	Group2	4.47761	3	[FLT3, KIT, MAPK1]
KEGG:05230	Central carbon metabolism in cancer	KEGG_25.05.2022	2.54219e-05	0.0010423	1.55866e-05	6.23465e-05	[-1]	Group2	5.71429	4	[FLT3, KIT, MAPK1, PDGFRA]
KEGG:00010	Glycolysis / Gluconeogenesis	KEGG_25.05.2022	1.36604e-08	8.87928e-07	2.12197e-07	1.06098e-06	[-1]	Group3	8.95522	6	[ALDH1B1, ALDH2, ALDH3B1, ALDH9A1, PGK2, TPI1]
KEGG:00053	Ascorbate and aldarate metabolism	KEGG_25.05.2022	5.28272e-05	0.00163764	2.12197e-07	1.06098e-06	[-1]	Group3	10	3	[ALDH1B1, ALDH2, ALDH9A1]
KEGG:00071	Fatty acid degradation	KEGG_25.05.2022	0.000157037	0.00298371	2.12197e-07	1.06098e-06	[-1]	Group3	6.97674	3	[ALDH1B1, ALDH2, ALDH9A1]
KEGG:00280	Valine, leucine and isoleucine degradation	KEGG_25.05.2022	0.000218211	0.00327317	2.12197e-07	1.06098e-06	[-1]	Group3	6.25	3	[ALDH1B1, ALDH2, ALDH9A1]
KEGG:00310	Lysine degradation	KEGG_25.05.2022	0.000488304	0.00244152	2.12197e-07	1.06098e-06	[-1]	Group3	4.7619	3	[ALDH1B1, ALDH2, ALDH9A1]
KEGG:00330	Arginine and proline metabolism	KEGG_25.05.2022	7.16848e-06	0.000358424	2.12197e-07	1.06098e-06	[-1]	Group3	7.84314	4	[ALDH1B1, ALDH2, ALDH9A1, CKM]
KEGG:00340	Histidine metabolism	KEGG_25.05.2022	2.21025e-07	1.39245e-05	2.12197e-07	1.06098e-06	[-1]	Group3	18.1818	4	[ALDH1B1, ALDH2, ALDH3B1, ALDH9A1]
KEGG:00380	Tryptophan metabolism	KEGG_25.05.2022	3.26293e-06	0.000179461	2.12197e-07	1.06098e-06	[-1]	Group3	9.52381	4	[ALDH1B1, ALDH2, ALDH9A1, CAT]
KEGG:00410	beta-Alanine metabolism	KEGG_25.05.2022	9.3551e-07	5.61306e-05	2.12197e-07	1.06098e-06	[-1]	Group3	12.9032	4	[ALDH1B1, ALDH2, ALDH3B1, ALDH9A1]
KEGG:00561	Glycerolipid metabolism	KEGG_25.05.2022	0.000444066	0.0026644	2.12197e-07	1.06098e-06	[-1]	Group3	4.91803	3	[ALDH1B1, ALDH2, ALDH9A1]
KEGG:00620	Pyruvate metabolism	KEGG_25.05.2022	0.000204924	0.00327878	2.12197e-07	1.06098e-06	[-1]	Group3	6.38298	3	[ALDH1B1, ALDH2, ALDH9A1]
KEGG:04540	Gap junction	KEGG_25.05.2022	2.35335e-06	0.000136495	0.000529457	0.00105891	[-1]	Group5	5.68182	5	[MAPK1, PDGFRA, TUBB2A, TUBB2B, TUBB4A]
R-HSA:8873719	RAB geranylgeranylation	REACTOME_Pathways_25.05.2022	0.000535274	0.00160582	0.000535274	0.000535274	[-1]	Group1	4.61538	3	[RAB10, RAB15, RAB1A]
R-HSA:71384	Ethanol oxidation	REACTOME_Pathways_25.05.2022	2.95238e-06	0.000165333	2.12197e-07	1.06098e-06	[-1]	Group3	25	3	[ALDH1A1, ALDH1B1, ALDH2]
R-HSA:6805567	Keratinization	REACTOME_Pathways_25.05.2022	2.11634e-09	1.39679e-07	2.97473e-08	1.78484e-07	[-1]	Group4	4.20561	9	[DSC1, DSG1, DSP, KRT31, KRT78, KRT81, KRT83, KRT86, LORICRIN]
R-HSA:6809371	Formation of the cornified envelope	REACTOME_Pathways_25.05.2022	2.47831e-11	1.68525e-09	2.97473e-08	1.78484e-07	[-1]	Group4	6.92308	9	[DSC1, DSG1, DSP, KRT31, KRT78, KRT81, KRT83, KRT86, LORICRIN]
R-HSA:1445148	Translocation of SLC2A4 (GLUT4) to the plasma membrane	REACTOME_Pathways_25.05.2022	2.84224e-05	0.00110848	0.000529457	0.00105891	[-1]	Group5	5.55556	4	[RAB10, TUBB2A, TUBB2B, TUBB4A]
R-HSA:157858	Gap junction trafficking and regulation	REACTOME_Pathways_25.05.2022	0.000232045	0.00324863	0.000529457	0.00105891	[-1]	Group5	6.12245	3	[TUBB2A, TUBB2B, TUBB4A]
R-HSA:190828	Gap junction trafficking	REACTOME_Pathways_25.05.2022	0.000204924	0.00327878	0.000529457	0.00105891	[-1]	Group5	6.38298	3	[TUBB2A, TUBB2B, TUBB4A]
R-HSA:190840	Microtubule-dependent trafficking of connexons from Golgi to the plasma membrane	REACTOME_Pathways_25.05.2022	1.08384e-05	0.000509405	0.000529457	0.00105891	[-1]	Group5	16.6667	3	[TUBB2A, TUBB2B, TUBB4A]
R-HSA:190861	Gap junction assembly	REACTOME_Pathways_25.05.2022	9.1952e-05	0.0021149	0.000529457	0.00105891	[-1]	Group5	8.33333	3	[TUBB2A, TUBB2B, TUBB4A]
R-HSA:190872	Transport of connexons to the plasma membrane	REACTOME_Pathways_25.05.2022	1.28485e-05	0.000591032	0.000529457	0.00105891	[-1]	Group5	15.7895	3	[TUBB2A, TUBB2B, TUBB4A]
R-HSA:2995410	Nuclear Envelope (NE) Reassembly	REACTOME_Pathways_25.05.2022	0.000813452	0.000813452	0.000529457	0.00105891	[-1]	Group5	4	3	[TUBB2A, TUBB2B, TUBB4A]
R-HSA:3371497	HSP90 chaperone cycle for steroid hormone receptors (SHR) in the presence of ligand	REACTOME_Pathways_25.05.2022	0.000327045	0.0029434	0.000529457	0.00105891	[-1]	Group5	5.45455	3	[TUBB2A, TUBB2B, TUBB4A]
R-HSA:389957	Prefoldin mediated transfer of substrate to CCT/TriC	REACTOME_Pathways_25.05.2022	4.27726e-05	0.00149704	0.000529457	0.00105891	[-1]	Group5	10.7143	3	[TUBB2A, TUBB2B, TUBB4A]
R-HSA:389958	Cooperation of Prefoldin and TriC/CCT in actin and tubulin folding	REACTOME_Pathways_25.05.2022	6.43166e-05	0.00173655	0.000529457	0.00105891	[-1]	Group5	9.375	3	[TUBB2A, TUBB2B, TUBB4A]
R-HSA:389960	Formation of tubulin folding intermediates by CCT/TriC	REACTOME_Pathways_25.05.2022	3.01846e-05	0.00111683	0.000529457	0.00105891	[-1]	Group5	12	3	[TUBB2A, TUBB2B, TUBB4A]
R-HSA:389977	Post-chaperonin tubulin folding pathway	REACTOME_Pathways_25.05.2022	2.03148e-05	0.000873538	0.000529457	0.00105891	[-1]	Group5	13.6364	3	[TUBB2A, TUBB2B, TUBB4A]
R-HSA:437239	Recycling pathway of L1	REACTOME_Pathways_25.05.2022	5.15325e-06	0.000267969	0.000529457	0.00105891	[-1]	Group5	8.51064	4	[MAPK1, TUBB2A, TUBB2B, TUBB4A]
R-HSA:438064	Post NMDA receptor activation events	REACTOME_Pathways_25.05.2022	4.30735e-05	0.0014645	0.000529457	0.00105891	[-1]	Group5	5	4	[MAPK1, TUBB2A, TUBB2B, TUBB4A]
R-HSA:442755	Activation of NMDA receptors and postsynaptic events	REACTOME_Pathways_25.05.2022	7.76899e-05	0.00194225	0.000529457	0.00105891	[-1]	Group5	4.30108	4	[MAPK1, TUBB2A, TUBB2B, TUBB4A]
R-HSA:5620924	Intraflagellar transport	REACTOME_Pathways_25.05.2022	0.000309736	0.00309736	0.000529457	0.00105891	[-1]	Group5	5.55556	3	[TUBB2A, TUBB2B, TUBB4A]
R-HSA:5626467	RHO GTPases activate IQGAPs	REACTOME_Pathways_25.05.2022	6.43166e-05	0.00173655	0.000529457	0.00105891	[-1]	Group5	9.375	3	[TUBB2A, TUBB2B, TUBB4A]
R-HSA:6811434	COPI-dependent Golgi-to-ER retrograde traffic	REACTOME_Pathways_25.05.2022	9.90958e-05	0.00218011	0.000529457	0.00105891	[-1]	Group5	4.0404	4	[RAB1A, TUBB2A, TUBB2B, TUBB4A]
R-HSA:6811436	COPI-independent Golgi-to-ER retrograde traffic	REACTOME_Pathways_25.05.2022	0.000261388	0.00339804	0.000529457	0.00105891	[-1]	Group5	5.88235	3	[TUBB2A, TUBB2B, TUBB4A]
R-HSA:8955332	Carboxyterminal post-translational modifications of tubulin	REACTOME_Pathways_25.05.2022	0.000146332	0.00292663	0.000529457	0.00105891	[-1]	Group5	7.14286	3	[TUBB2A, TUBB2B, TUBB4A]
R-HSA:9609736	Assembly and cell surface presentation of NMDA receptors	REACTOME_Pathways_25.05.2022	0.000136112	0.00285836	0.000529457	0.00105891	[-1]	Group5	7.31707	3	[TUBB2A, TUBB2B, TUBB4A]
R-HSA:9619483	Activation of AMPK downstream of NMDARs	REACTOME_Pathways_25.05.2022	4.76261e-05	0.00152404	0.000529457	0.00105891	[-1]	Group5	10.3448	3	[TUBB2A, TUBB2B, TUBB4A]
R-HSA:9646399	Aggrephagy	REACTOME_Pathways_25.05.2022	0.000157037	0.00298371	0.000529457	0.00105891	[-1]	Group5	6.97674	3	[TUBB2A, TUBB2B, TUBB4A]
R-HSA:9668328	Sealing of the nuclear envelope (NE) by ESCRT-III	REACTOME_Pathways_25.05.2022	5.8387e-05	0.00169322	0.000529457	0.00105891	[-1]	Group5	9.67742	3	[TUBB2A, TUBB2B, TUBB4A]
R-HSA:983189	Kinesins	REACTOME_Pathways_25.05.2022	0.000402491	0.00281744	0.000529457	0.00105891	[-1]	Group5	5.08475	3	[TUBB2A, TUBB2B, TUBB4A]
R-HSA:8870466	RGGT:CHM binds RABs	REACTOME_Reactions_25.05.2022	0.000511444	0.00204577	0.000535274	0.000535274	[-1]	Group1	4.6875	3	[RAB10, RAB15, RAB1A]
R-HSA:8870469	RGGT geranylgeranylates RAB proteins	REACTOME_Reactions_25.05.2022	0.000511444	0.00204577	0.000535274	0.000535274	[-1]	Group1	4.6875	3	[RAB10, RAB15, RAB1A]
R-HSA:6800426	Exocytosis of ficolin-rich granule membrane proteins	REACTOME_Reactions_25.05.2022	0.000444066	0.0026644	2.97473e-08	1.78484e-07	[-1]	Group4	4.91803	3	[DSC1, DSG1, DSP]
R-HSA:6805546	Keratin type I binds keratin type II	REACTOME_Reactions_25.05.2022	2.21952e-07	1.37611e-05	2.97473e-08	1.78484e-07	[-1]	Group4	9.09091	5	[KRT31, KRT78, KRT81, KRT83, KRT86]
R-HSA:6805573	Keratin type I/type II heterodimers form tetramers	REACTOME_Reactions_25.05.2022	2.21952e-07	1.37611e-05	2.97473e-08	1.78484e-07	[-1]	Group4	9.09091	5	[KRT31, KRT78, KRT81, KRT83, KRT86]
R-HSA:6806610	Keratin filament formation	REACTOME_Reactions_25.05.2022	2.21952e-07	1.37611e-05	2.97473e-08	1.78484e-07	[-1]	Group4	9.09091	5	[KRT31, KRT78, KRT81, KRT83, KRT86]
R-HSA:6806613	Keratin tetramers bind to form unit length filaments	REACTOME_Reactions_25.05.2022	2.21952e-07	1.37611e-05	2.97473e-08	1.78484e-07	[-1]	Group4	9.09091	5	[KRT31, KRT78, KRT81, KRT83, KRT86]
R-HSA:6806629	Formation of tonofilament bundles	REACTOME_Reactions_25.05.2022	2.21952e-07	1.37611e-05	2.97473e-08	1.78484e-07	[-1]	Group4	9.09091	5	[KRT31, KRT78, KRT81, KRT83, KRT86]
R-HSA:6809393	Keratin filaments bind cell-cell adhesion complexes	REACTOME_Reactions_25.05.2022	4.54287e-12	3.22544e-10	2.97473e-08	1.78484e-07	[-1]	Group4	11.7647	8	[DSC1, DSG1, DSP, KRT31, KRT78, KRT81, KRT83, KRT86]
R-HSA:6810357	Fillagrin and keratin intermediate filaments polymerise forming a network	REACTOME_Reactions_25.05.2022	5.12932e-12	3.53923e-10	2.97473e-08	1.78484e-07	[-1]	Group4	11.5942	8	[DSC1, DSG1, DSP, KRT31, KRT78, KRT81, KRT83, KRT86]
R-HSA:6810937	Lamellar bodies bind the early cornified envelope	REACTOME_Reactions_25.05.2022	6.23798e-13	4.74087e-11	2.97473e-08	1.78484e-07	[-1]	Group4	10.3448	9	[DSC1, DSG1, DSP, KRT31, KRT78, KRT81, KRT83, KRT86, LORICRIN]
R-HSA:6811539	Reinforcement of the Cornified Envelope	REACTOME_Reactions_25.05.2022	6.23798e-13	4.74087e-11	2.97473e-08	1.78484e-07	[-1]	Group4	10.3448	9	[DSC1, DSG1, DSP, KRT31, KRT78, KRT81, KRT83, KRT86, LORICRIN]
R-HSA:6814298	Late envelope proteins bind cornified envelope:CDSN	REACTOME_Reactions_25.05.2022	4.2065e-12	3.02868e-10	2.97473e-08	1.78484e-07	[-1]	Group4	8.41121	9	[DSC1, DSG1, DSP, KRT31, KRT78, KRT81, KRT83, KRT86, LORICRIN]
R-HSA:6814387	CASP14 cleaves filaggrin	REACTOME_Reactions_25.05.2022	4.58066e-12	3.20646e-10	2.97473e-08	1.78484e-07	[-1]	Group4	8.33333	9	[DSC1, DSG1, DSP, KRT31, KRT78, KRT81, KRT83, KRT86, LORICRIN]
R-HSA:6814695	PERP binds desmosomes	REACTOME_Reactions_25.05.2022	4.8681e-06	0.000258009	2.97473e-08	1.78484e-07	[-1]	Group4	21.4286	3	[DSC1, DSG1, DSP]
R-HSA:6814734	CDSN binds the cornified envelope	REACTOME_Reactions_25.05.2022	6.93616e-13	5.20212e-11	2.97473e-08	1.78484e-07	[-1]	Group4	10.2273	9	[DSC1, DSG1, DSP, KRT31, KRT78, KRT81, KRT83, KRT86, LORICRIN]
R-HSA:6814764	Plasma membrane resorption	REACTOME_Reactions_25.05.2022	3.85962e-12	2.81752e-10	2.97473e-08	1.78484e-07	[-1]	Group4	8.49057	9	[DSC1, DSG1, DSP, KRT31, KRT78, KRT81, KRT83, KRT86, LORICRIN]
R-HSA:8942224	Filaggrin binds Keratin tonofilament:Desmosome	REACTOME_Reactions_25.05.2022	5.12932e-12	3.53923e-10	2.97473e-08	1.78484e-07	[-1]	Group4	11.5942	8	[DSC1, DSG1, DSP, KRT31, KRT78, KRT81, KRT83, KRT86]
R-HSA:190520	Association of Golgi transport vesicles with microtubules	REACTOME_Reactions_25.05.2022	1.08384e-05	0.000509405	0.000529457	0.00105891	[-1]	Group5	16.6667	3	[TUBB2A, TUBB2B, TUBB4A]
R-HSA:190877	Insertion of connexons into the plasma membrane resulting in the formation of hemi-channels	REACTOME_Reactions_25.05.2022	1.08384e-05	0.000509405	0.000529457	0.00105891	[-1]	Group5	16.6667	3	[TUBB2A, TUBB2B, TUBB4A]
R-HSA:191737	Docking of connexons into junctional, double-membrane spanning channels	REACTOME_Reactions_25.05.2022	1.08384e-05	0.000509405	0.000529457	0.00105891	[-1]	Group5	16.6667	3	[TUBB2A, TUBB2B, TUBB4A]
R-HSA:2316347	RAB4A:GTP binds KIF3 and activates KIF3	REACTOME_Reactions_25.05.2022	1.75748e-05	0.00077329	0.000529457	0.00105891	[-1]	Group5	14.2857	3	[TUBB2A, TUBB2B, TUBB4A]
R-HSA:389954	Hydrolysis of ATP and release of tubulin folding intermediate from CCT/TriC	REACTOME_Reactions_25.05.2022	3.01846e-05	0.00111683	0.000529457	0.00105891	[-1]	Group5	12	3	[TUBB2A, TUBB2B, TUBB4A]
R-HSA:389955	Beta-tubulin:GTP: Cofactor A+ Cofactor D -> Beta-tubulin:GTP:Cofactor D + Cofactor A	REACTOME_Reactions_25.05.2022	1.1331e-06	6.68527e-05	0.000529457	0.00105891	[-1]	Group5	33.3333	3	[TUBB2A, TUBB2B, TUBB4A]
R-HSA:389956	Beta-tubulin:GTP + Cofactor A -> Beta-tubulin:GTP: Cofactor A	REACTOME_Reactions_25.05.2022	7.56697e-07	4.61585e-05	0.000529457	0.00105891	[-1]	Group5	37.5	3	[TUBB2A, TUBB2B, TUBB4A]
R-HSA:389961	ADP is exchanged for ATP in the (ADP:CCT/TriC):tubulin complex	REACTOME_Reactions_25.05.2022	3.01846e-05	0.00111683	0.000529457	0.00105891	[-1]	Group5	12	3	[TUBB2A, TUBB2B, TUBB4A]
R-HSA:389964	Beta-tubulin:GTP:Cofactor D:alpha-tubulin:GTP:Cofactor E+ Cofactor C-> Beta-tubulin:GTP:Cofactor D:alpha-tubulin:GTP:Cofactor E:Cofactor C	REACTOME_Reactions_25.05.2022	1.28485e-05	0.000591032	0.000529457	0.00105891	[-1]	Group5	15.7895	3	[TUBB2A, TUBB2B, TUBB4A]
R-HSA:389969	Beta-tubulin:GTP + Cofactor D -> Beta-tubulin:GTP: Cofactor D	REACTOME_Reactions_25.05.2022	1.1331e-06	6.68527e-05	0.000529457	0.00105891	[-1]	Group5	33.3333	3	[TUBB2A, TUBB2B, TUBB4A]
R-HSA:389970	Actin/tubulin:prefoldin complex associates with CCT/TriC	REACTOME_Reactions_25.05.2022	4.27726e-05	0.00149704	0.000529457	0.00105891	[-1]	Group5	10.7143	3	[TUBB2A, TUBB2B, TUBB4A]
R-HSA:389974	Beta-tubulin:GTP:Cofactor D:alpha-tubulin:GTP:Cofactor E:Cofactor C-> Beta-tubulin:GDP :alpha-tubulin:GTP heterodimer +Cofactor E+ Cofactor D+ Cofactor C+ Pi	REACTOME_Reactions_25.05.2022	1.28485e-05	0.000591032	0.000529457	0.00105891	[-1]	Group5	15.7895	3	[TUBB2A, TUBB2B, TUBB4A]
R-HSA:389976	Beta-tubulin:GTP:Cofactor D+alpha-tubulin:GTP:Cofactor E-> Beta-tubulin:GTP:Cofactor D:alpha-tubulin:GTP:Cofactor E	REACTOME_Reactions_25.05.2022	1.08384e-05	0.000509405	0.000529457	0.00105891	[-1]	Group5	16.6667	3	[TUBB2A, TUBB2B, TUBB4A]
R-HSA:389980	unfolded actin/tubulin associates with prefoldin	REACTOME_Reactions_25.05.2022	1.28485e-05	0.000591032	0.000529457	0.00105891	[-1]	Group5	15.7895	3	[TUBB2A, TUBB2B, TUBB4A]
R-HSA:445071	Reinsertion of L1 into the plasma membrane	REACTOME_Reactions_25.05.2022	4.27726e-05	0.00149704	0.000529457	0.00105891	[-1]	Group5	10.7143	3	[TUBB2A, TUBB2B, TUBB4A]
R-HSA:445077	Transport of L1 from C-domain to P-domain	REACTOME_Reactions_25.05.2022	4.27726e-05	0.00149704	0.000529457	0.00105891	[-1]	Group5	10.7143	3	[TUBB2A, TUBB2B, TUBB4A]
R-HSA:5610733	KIF7 is recruited to the ciliary tip through interaction with axonemal microtubules	REACTOME_Reactions_25.05.2022	4.8681e-06	0.000258009	0.000529457	0.00105891	[-1]	Group5	21.4286	3	[TUBB2A, TUBB2B, TUBB4A]
R-HSA:5610767	The intraflagellar transport B (IFT-B) complex is required for the transit of GLI:SUFU complexes to the ciliary tip	REACTOME_Reactions_25.05.2022	4.27726e-05	0.00149704	0.000529457	0.00105891	[-1]	Group5	10.7143	3	[TUBB2A, TUBB2B, TUBB4A]
R-HSA:5618080	HSP90:ATP:p23:FKBP52:SHR:SH translocates to the nucleus	REACTOME_Reactions_25.05.2022	0.000168239	0.0030283	0.000529457	0.00105891	[-1]	Group5	6.81818	3	[TUBB2A, TUBB2B, TUBB4A]
R-HSA:5618328	ATAT acetylates microtubules	REACTOME_Reactions_25.05.2022	1.08384e-05	0.000509405	0.000529457	0.00105891	[-1]	Group5	16.6667	3	[TUBB2A, TUBB2B, TUBB4A]
R-HSA:5618331	HDAC6 deacetylates microtubules	REACTOME_Reactions_25.05.2022	1.08384e-05	0.000509405	0.000529457	0.00105891	[-1]	Group5	16.6667	3	[TUBB2A, TUBB2B, TUBB4A]
R-HSA:5624949	Assembly of the anterograde IFT train	REACTOME_Reactions_25.05.2022	0.000276917	0.003323	0.000529457	0.00105891	[-1]	Group5	5.76923	3	[TUBB2A, TUBB2B, TUBB4A]
R-HSA:5624952	Assembly of the retrograde IFT train	REACTOME_Reactions_25.05.2022	0.000276917	0.003323	0.000529457	0.00105891	[-1]	Group5	5.76923	3	[TUBB2A, TUBB2B, TUBB4A]
R-HSA:5625416	Anterograde IFT	REACTOME_Reactions_25.05.2022	0.000276917	0.003323	0.000529457	0.00105891	[-1]	Group5	5.76923	3	[TUBB2A, TUBB2B, TUBB4A]
R-HSA:5625421	The anterograde IFT train dissociates	REACTOME_Reactions_25.05.2022	0.000276917	0.003323	0.000529457	0.00105891	[-1]	Group5	5.76923	3	[TUBB2A, TUBB2B, TUBB4A]
R-HSA:5625424	The retrograde IFT train dissociates	REACTOME_Reactions_25.05.2022	0.000276917	0.003323	0.000529457	0.00105891	[-1]	Group5	5.76923	3	[TUBB2A, TUBB2B, TUBB4A]
R-HSA:5625426	Retrograde IFT	REACTOME_Reactions_25.05.2022	0.000276917	0.003323	0.000529457	0.00105891	[-1]	Group5	5.76923	3	[TUBB2A, TUBB2B, TUBB4A]
R-HSA:5672329	IQGAP1 binds CLIP1 and microtubules	REACTOME_Reactions_25.05.2022	1.75748e-05	0.00077329	0.000529457	0.00105891	[-1]	Group5	14.2857	3	[TUBB2A, TUBB2B, TUBB4A]
R-HSA:6809003	ERGIC-to-Golgi vesicles bind dynein:dynactin	REACTOME_Reactions_25.05.2022	3.00164e-05	0.00114062	0.000529457	0.00105891	[-1]	Group5	5.47945	4	[RAB1A, TUBB2A, TUBB2B, TUBB4A]
R-HSA:6809006	Vesicle is tethered through binding GOLGA2:GORASP1, GOLGB1 and the COG complex	REACTOME_Reactions_25.05.2022	5.46529e-05	0.00163959	0.000529457	0.00105891	[-1]	Group5	4.70588	4	[RAB1A, TUBB2A, TUBB2B, TUBB4A]
R-HSA:6811423	Retrograde vesicle is tethered at the ER by the NRZ complex and t-SNAREs	REACTOME_Reactions_25.05.2022	5.98667e-05	0.00167627	0.000529457	0.00105891	[-1]	Group5	4.5977	4	[RAB1A, TUBB2A, TUBB2B, TUBB4A]
R-HSA:6811426	Retrograde COPI vesicles bind kinesin and microtubules	REACTOME_Reactions_25.05.2022	4.52301e-05	0.00149259	0.000529457	0.00105891	[-1]	Group5	4.93827	4	[RAB1A, TUBB2A, TUBB2B, TUBB4A]
R-HSA:8849350	RAB6:GTP displaces PAFAH1B1 from dynein:dynactin complex	REACTOME_Reactions_25.05.2022	0.000157037	0.00298371	0.000529457	0.00105891	[-1]	Group5	6.97674	3	[TUBB2A, TUBB2B, TUBB4A]
R-HSA:8849353	Dynein drives COPI-independent retrograde traffic from the Golgi to the ER	REACTOME_Reactions_25.05.2022	0.000179948	0.00305911	0.000529457	0.00105891	[-1]	Group5	6.66667	3	[TUBB2A, TUBB2B, TUBB4A]
R-HSA:8852280	GTSE1 binds microtubule lattice in interphase cells	REACTOME_Reactions_25.05.2022	1.08384e-05	0.000509405	0.000529457	0.00105891	[-1]	Group5	16.6667	3	[TUBB2A, TUBB2B, TUBB4A]
R-HSA:8852298	GTSE1 binds MAPRE1 (EB1) at microtubule plus ends	REACTOME_Reactions_25.05.2022	1.28485e-05	0.000591032	0.000529457	0.00105891	[-1]	Group5	15.7895	3	[TUBB2A, TUBB2B, TUBB4A]
R-HSA:8852306	Mitotic phosphorylation-induced dissociation of GTSE1 from microtubule plus ends	REACTOME_Reactions_25.05.2022	2.03148e-05	0.000873538	0.000529457	0.00105891	[-1]	Group5	13.6364	3	[TUBB2A, TUBB2B, TUBB4A]
R-HSA:8865774	TTLLs polyglutamylate tubulin	REACTOME_Reactions_25.05.2022	3.01846e-05	0.00111683	0.000529457	0.00105891	[-1]	Group5	12	3	[TUBB2A, TUBB2B, TUBB4A]
R-HSA:8866105	CCPs deglutamylate tubulin	REACTOME_Reactions_25.05.2022	2.3322e-05	0.000979525	0.000529457	0.00105891	[-1]	Group5	13.0435	3	[TUBB2A, TUBB2B, TUBB4A]
R-HSA:8867370	TTLL3, TTLL8, TTLL10 polyglycylate tubulin	REACTOME_Reactions_25.05.2022	1.28485e-05	0.000591032	0.000529457	0.00105891	[-1]	Group5	15.7895	3	[TUBB2A, TUBB2B, TUBB4A]
R-HSA:8955706	TTL ligates L-Tyr to the carboxy terminus of detyr-alpha tubulin:beta tubulin	REACTOME_Reactions_25.05.2022	6.07468e-06	0.000309809	0.000529457	0.00105891	[-1]	Group5	20	3	[TUBB2A, TUBB2B, TUBB4A]
R-HSA:8955712	SVBP:VASH1,VASH2 hydrolyzes the terminal L-Tyr residue from alphaY-beta tubulin dimer	REACTOME_Reactions_25.05.2022	9.04752e-06	0.000434281	0.000529457	0.00105891	[-1]	Group5	17.6471	3	[TUBB2A, TUBB2B, TUBB4A]
R-HSA:8955869	Polyglutamylase complex (TTLL1) polyglutamylates alpha subunits of tubulin	REACTOME_Reactions_25.05.2022	2.03148e-05	0.000873538	0.000529457	0.00105891	[-1]	Group5	13.6364	3	[TUBB2A, TUBB2B, TUBB4A]
R-HSA:9610408	GluN1:GluN2B (GRIN1:GRIN2B) di-heterotetramers bind LIN7:CASK:APBA1, DLG1 and KIF17	REACTOME_Reactions_25.05.2022	3.40632e-05	0.00122627	0.000529457	0.00105891	[-1]	Group5	11.5385	3	[TUBB2A, TUBB2B, TUBB4A]
R-HSA:9610627	KIF17 transports GluN1:GluN2B (GRIN1:GRIN2B) NMDA receptors to the plasma membrane	REACTOME_Reactions_25.05.2022	3.40632e-05	0.00122627	0.000529457	0.00105891	[-1]	Group5	11.5385	3	[TUBB2A, TUBB2B, TUBB4A]
R-HSA:9614343	Viral UL47:UL48 Proteins Bind HCMV Tegumented Virion to Host Microtuble and Dynein complexs	REACTOME_Reactions_25.05.2022	2.6608e-05	0.00106432	0.000529457	0.00105891	[-1]	Group5	12.5	3	[TUBB2A, TUBB2B, TUBB4A]
R-HSA:9614367	HCMV Nuclear Pore Docking	REACTOME_Reactions_25.05.2022	0.000293029	0.00322332	0.000529457	0.00105891	[-1]	Group5	5.66038	3	[TUBB2A, TUBB2B, TUBB4A]
R-HSA:9619542	AMPK negatively regulates binding of MAPT to microtubules	REACTOME_Reactions_25.05.2022	3.01846e-05	0.00111683	0.000529457	0.00105891	[-1]	Group5	12	3	[TUBB2A, TUBB2B, TUBB4A]
R-HSA:9646383	Dynein motors transport misfolded proteins	REACTOME_Reactions_25.05.2022	8.4434e-05	0.00202641	0.000529457	0.00105891	[-1]	Group5	8.57143	3	[TUBB2A, TUBB2B, TUBB4A]
R-HSA:9646390	Misfolded proteins:HDAC6:Dynein motor binds microtubule	REACTOME_Reactions_25.05.2022	8.4434e-05	0.00202641	0.000529457	0.00105891	[-1]	Group5	8.57143	3	[TUBB2A, TUBB2B, TUBB4A]
R-HSA:9646679	PolyUb-Misfolded proteins bind vimentin to form aggresome	REACTOME_Reactions_25.05.2022	9.1952e-05	0.0021149	0.000529457	0.00105891	[-1]	Group5	8.33333	3	[TUBB2A, TUBB2B, TUBB4A]
R-HSA:9646685	Aggresome dissociates from dynein and microtubule	REACTOME_Reactions_25.05.2022	9.1952e-05	0.0021149	0.000529457	0.00105891	[-1]	Group5	8.33333	3	[TUBB2A, TUBB2B, TUBB4A]
R-HSA:9648017	EML4 binds to microtubules	REACTOME_Reactions_25.05.2022	1.75748e-05	0.00077329	0.000529457	0.00105891	[-1]	Group5	14.2857	3	[TUBB2A, TUBB2B, TUBB4A]
R-HSA:9668419	SPAST (spastin) mediates the severing of microtubules at chromosome attachment sites	REACTOME_Reactions_25.05.2022	5.28272e-05	0.00163764	0.000529457	0.00105891	[-1]	Group5	10	3	[TUBB2A, TUBB2B, TUBB4A]
R-HSA:983259	Kinesins move along microtubules consuming ATP	REACTOME_Reactions_25.05.2022	0.000402491	0.00281744	0.000529457	0.00105891	[-1]	Group5	5.08475	3	[TUBB2A, TUBB2B, TUBB4A]
R-HSA:983266	Kinesins bind microtubules	REACTOME_Reactions_25.05.2022	0.000402491	0.00281744	0.000529457	0.00105891	[-1]	Group5	5.08475	3	[TUBB2A, TUBB2B, TUBB4A]
R-NUL:8867463	Ccps deglutamylate tubulin	REACTOME_Reactions_25.05.2022	9.04752e-06	0.000434281	0.000529457	0.00105891	[-1]	Group5	17.6471	3	[TUBB2A, TUBB2B, TUBB4A]
R-NUL:8955873	Polyglutamylase complex (Ttll1) polyglutamylates alpha subunits of tubulin	REACTOME_Reactions_25.05.2022	9.04752e-06	0.000434281	0.000529457	0.00105891	[-1]	Group5	17.6471	3	[TUBB2A, TUBB2B, TUBB4A]

## Sheet: ClueGO Results_Maitake
ID	Term	Ontology Source	Term PValue	Term PValue Corrected with Bonferroni step down	Group PValue	Group PValue Corrected with Bonferroni step down	GOLevels	GOGroups	% Associated Genes	Nr. Genes	Associated Genes Found
GO:0032786	positive regulation of DNA-templated transcription, elongation	GO_BiologicalProcess-EBI-UniProt-GOA-ACAP-ARAP_25.05.2022_00h00	0.000215697	0.0144517	0.00227016	0.00227016	[7, 8, 9, 10, 11, 12]	Group04	6.55738	4	[CDK12, CDK13, CDK9, DDX39B]
GO:0005980	glycogen catabolic process	GO_BiologicalProcess-EBI-UniProt-GOA-ACAP-ARAP_25.05.2022_00h00	5.83527e-05	0.00554351	9.84215e-07	5.90529e-06	[6, 7, 8]	Group05	18.75	3	[PPP1CA, PYGB, PYGM]
GO:0000082	G1/S transition of mitotic cell cycle	GO_BiologicalProcess-EBI-UniProt-GOA-ACAP-ARAP_25.05.2022_00h00	1.3982e-09	4.54414e-07	3.76276e-13	6.77297e-12	[5, 6]	Group07	5.12821	12	[CDK10, CDK14, CDK15, CDK16, CDK17, CDK18, CDK2, CDK3, CDK4, CDK5, CDK6, PPP2CA]
GO:0004693	cyclin-dependent protein serine/threonine kinase activity	GO_BiologicalProcess-EBI-UniProt-GOA-ACAP-ARAP_25.05.2022_00h00	6.23342e-19	2.41857e-16	3.76276e-13	6.77297e-12	[5, 6]	Group07	11.3333	17	[CDK1, CDK10, CDK12, CDK13, CDK14, CDK15, CDK16, CDK17, CDK18, CDK2, CDK20, CDK3, CDK4, CDK5, CDK6, CDK9, SFN]
GO:0000083	regulation of transcription involved in G1/S transition of mitotic cell cycle	GO_BiologicalProcess-EBI-UniProt-GOA-ACAP-ARAP_25.05.2022_00h00	7.58591e-10	2.54128e-07	3.76276e-13	6.77297e-12	[4, 5, 6, 7, 8, 9, 10, 11]	Group07	27.2727	6	[CDK14, CDK15, CDK16, CDK17, CDK18, CDK5]
GO:2000251	positive regulation of actin cytoskeleton reorganization	GO_BiologicalProcess-EBI-UniProt-GOA-ACAP-ARAP_25.05.2022_00h00	4.52226e-08	1.2391e-05	1.54335e-07	1.38901e-06	[5, 6, 7, 8, 9]	Group10	23.8095	5	[CDC42, CDK5, HCK, HRAS, TEK]
GO:0090314	positive regulation of protein targeting to membrane	GO_BiologicalProcess-EBI-UniProt-GOA-ACAP-ARAP_25.05.2022_00h00	0.000488682	0.0234567	1.54335e-07	1.38901e-06	[5, 6, 7, 8, 9, 10, 11]	Group10	9.375	3	[CDK5, FYN, HRAS]
GO:0046902	regulation of mitochondrial membrane permeability	GO_BiologicalProcess-EBI-UniProt-GOA-ACAP-ARAP_25.05.2022_00h00	0.000244397	0.0156414	2.32924e-10	3.02802e-09	[4, 5, 6, 7]	Group11	6.34921	4	[CNP, SLC25A31, SLC25A4, SLC25A6]
GO:0140021	mitochondrial ADP transmembrane transport	GO_BiologicalProcess-EBI-UniProt-GOA-ACAP-ARAP_25.05.2022_00h00	2.15848e-06	0.000395002	2.32924e-10	3.02802e-09	[4, 5, 6, 7, 8, 10]	Group11	50	3	[SLC25A31, SLC25A4, SLC25A6]
GO:1990544	mitochondrial ATP transmembrane transport	GO_BiologicalProcess-EBI-UniProt-GOA-ACAP-ARAP_25.05.2022_00h00	2.15848e-06	0.000395002	2.32924e-10	3.02802e-09	[4, 5, 6, 7, 8, 10]	Group11	50	3	[SLC25A31, SLC25A4, SLC25A6]
GO:0097345	mitochondrial outer membrane permeabilization	GO_BiologicalProcess-EBI-UniProt-GOA-ACAP-ARAP_25.05.2022_00h00	0.000693702	0.0291355	2.32924e-10	3.02802e-09	[4, 5, 6, 7, 8, 9, 10, 11]	Group11	8.33333	3	[SLC25A31, SLC25A4, SLC25A6]
GO:1901029	negative regulation of mitochondrial outer membrane permeabilization involved in apoptotic signaling pathway	GO_BiologicalProcess-EBI-UniProt-GOA-ACAP-ARAP_25.05.2022_00h00	3.01168e-05	0.00334297	2.32924e-10	3.02802e-09	[5, 6, 7, 8, 9, 10, 11, 12, 13]	Group11	23.0769	3	[SLC25A31, SLC25A4, SLC25A6]
GO:0005471	ATP:ADP antiporter activity	GO_BiologicalProcess-EBI-UniProt-GOA-ACAP-ARAP_25.05.2022_00h00	3.76409e-06	0.000639895	2.32924e-10	3.02802e-09	[7, 8, 9, 10, 11, 12]	Group11	42.8571	3	[SLC25A31, SLC25A4, SLC25A6]
GO:0045197	establishment or maintenance of epithelial cell apical/basal polarity	GO_BiologicalProcess-EBI-UniProt-GOA-ACAP-ARAP_25.05.2022_00h00	0.00238557	0.0381691	1.68775e-05	8.43874e-05	[5]	Group12	5.45455	3	[CDC42, CRB2, RHOA]
GO:0060425	lung morphogenesis	GO_BiologicalProcess-EBI-UniProt-GOA-ACAP-ARAP_25.05.2022_00h00	0.000115674	0.00902259	1.68775e-05	8.43874e-05	[4, 5, 6, 7]	Group12	7.69231	4	[CDC42, FGFR2, KRAS, NRAS]
GO:0030901	midbrain development	GO_BiologicalProcess-EBI-UniProt-GOA-ACAP-ARAP_25.05.2022_00h00	0.000155841	0.0115322	1.68775e-05	8.43874e-05	[3, 5, 6, 7, 8]	Group12	4.7619	5	[CDC42, CNP, FGFR2, RHOA, YWHAH]
GO:0060071	Wnt signaling pathway, planar cell polarity pathway	GO_BiologicalProcess-EBI-UniProt-GOA-ACAP-ARAP_25.05.2022_00h00	0.00277664	0.0360963	1.68775e-05	8.43874e-05	[6, 7, 8, 9]	Group12	5.17241	3	[CDC42, RAC1, RHOA]
GO:0051496	positive regulation of stress fiber assembly	GO_BiologicalProcess-EBI-UniProt-GOA-ACAP-ARAP_25.05.2022_00h00	0.00251185	0.0376778	1.68775e-05	8.43874e-05	[5, 6, 7, 8, 9, 10, 11, 12, 13]	Group12	5.35714	3	[CDC42, RAC1, RHOA]
GO:0043299	leukocyte degranulation	GO_BiologicalProcess-EBI-UniProt-GOA-ACAP-ARAP_25.05.2022_00h00	0.000949254	0.0322746	8.75385e-07	6.12769e-06	[3, 4, 6, 7, 8]	Group13	4.44444	4	[BLK, FGR, HCK, LYN]
GO:0001727	lipid kinase activity	GO_BiologicalProcess-EBI-UniProt-GOA-ACAP-ARAP_25.05.2022_00h00	3.77532e-05	0.00400184	8.75385e-07	6.12769e-06	[6, 7]	Group13	6.41026	5	[CDC42, FGFR3, FGR, LYN, TEK]
GO:0043304	regulation of mast cell degranulation	GO_BiologicalProcess-EBI-UniProt-GOA-ACAP-ARAP_25.05.2022_00h00	0.000488682	0.0234567	8.75385e-07	6.12769e-06	[5, 6, 7, 8, 9, 10]	Group13	9.375	3	[BLK, FGR, LYN]
GO:0042509	regulation of tyrosine phosphorylation of STAT protein	GO_BiologicalProcess-EBI-UniProt-GOA-ACAP-ARAP_25.05.2022_00h00	0.000669159	0.0287738	8.75385e-07	6.12769e-06	[7, 8, 9, 10]	Group13	4.87805	4	[FGFR3, FYN, LYN, PPP2CA]
GO:0043552	positive regulation of phosphatidylinositol 3-kinase activity	GO_BiologicalProcess-EBI-UniProt-GOA-ACAP-ARAP_25.05.2022_00h00	5.88438e-07	0.000130633	8.75385e-07	6.12769e-06	[5, 6, 7, 8, 9, 10, 11, 12]	Group13	14.7059	5	[CDC42, FGFR3, FGR, LYN, TEK]
GO:0035004	phosphatidylinositol 3-kinase activity	GO_BiologicalProcess-EBI-UniProt-GOA-ACAP-ARAP_25.05.2022_00h00	2.2313e-05	0.00267756	8.75385e-07	6.12769e-06	[8, 9, 10]	Group13	7.14286	5	[CDC42, FGFR3, FGR, LYN, TEK]
GO:1904646	cellular response to amyloid-beta	GO_BiologicalProcess-EBI-UniProt-GOA-ACAP-ARAP_25.05.2022_00h00	0.00125132	0.0337857	1.70456e-10	2.38638e-09	[6, 7]	Group14	6.81818	3	[CDK5, FYN, TLR6]
GO:2000251	positive regulation of actin cytoskeleton reorganization	GO_BiologicalProcess-EBI-UniProt-GOA-ACAP-ARAP_25.05.2022_00h00	4.52226e-08	1.2391e-05	1.70456e-10	2.38638e-09	[5, 6, 7, 8, 9]	Group14	23.8095	5	[CDC42, CDK5, HCK, HRAS, TEK]
GO:0090314	positive regulation of protein targeting to membrane	GO_BiologicalProcess-EBI-UniProt-GOA-ACAP-ARAP_25.05.2022_00h00	0.000488682	0.0234567	1.70456e-10	2.38638e-09	[5, 6, 7, 8, 9, 10, 11]	Group14	9.375	3	[CDK5, FYN, HRAS]
GO:0045197	establishment or maintenance of epithelial cell apical/basal polarity	GO_BiologicalProcess-EBI-UniProt-GOA-ACAP-ARAP_25.05.2022_00h00	0.00238557	0.0381691	3.34622e-16	9.03481e-15	[5]	Group18	5.45455	3	[CDC42, CRB2, RHOA]
GO:1900026	positive regulation of substrate adhesion-dependent cell spreading	GO_BiologicalProcess-EBI-UniProt-GOA-ACAP-ARAP_25.05.2022_00h00	0.00171067	0.0359241	3.34622e-16	9.03481e-15	[5, 6, 7, 8]	Group18	6.12245	3	[CDC42, RAC1, RAC3]
GO:0060071	Wnt signaling pathway, planar cell polarity pathway	GO_BiologicalProcess-EBI-UniProt-GOA-ACAP-ARAP_25.05.2022_00h00	0.00277664	0.0360963	3.34622e-16	9.03481e-15	[6, 7, 8, 9]	Group18	5.17241	3	[CDC42, RAC1, RHOA]
GO:0051496	positive regulation of stress fiber assembly	GO_BiologicalProcess-EBI-UniProt-GOA-ACAP-ARAP_25.05.2022_00h00	0.00251185	0.0376778	3.34622e-16	9.03481e-15	[5, 6, 7, 8, 9, 10, 11, 12, 13]	Group18	5.35714	3	[CDC42, RAC1, RHOA]
GO:0004693	cyclin-dependent protein serine/threonine kinase activity	GO_BiologicalProcess-EBI-UniProt-GOA-ACAP-ARAP_25.05.2022_00h00	6.23342e-19	2.41857e-16	6.72002e-27	2.35201e-25	[5, 6]	Group20	11.3333	17	[CDK1, CDK10, CDK12, CDK13, CDK14, CDK15, CDK16, CDK17, CDK18, CDK2, CDK20, CDK3, CDK4, CDK5, CDK6, CDK9, SFN]
GO:0044344	cellular response to fibroblast growth factor stimulus	GO_BiologicalProcess-EBI-UniProt-GOA-ACAP-ARAP_25.05.2022_00h00	0.000210837	0.0143369	1.36226e-16	3.81432e-15	[4, 6]	Group24	4.46429	5	[CPS1, FGFR1, FGFR2, FGFR3, FGFR4]
GO:0060193	positive regulation of lipase activity	GO_BiologicalProcess-EBI-UniProt-GOA-ACAP-ARAP_25.05.2022_00h00	3.32912e-05	0.00359544	1.36226e-16	3.81432e-15	[6]	Group24	6.57895	5	[FGFR1, FGFR2, FGFR3, HRAS, RHOA]
GO:0004713	protein tyrosine kinase activity	GO_BiologicalProcess-EBI-UniProt-GOA-ACAP-ARAP_25.05.2022_00h00	3.25785e-11	1.16631e-08	1.36226e-16	3.81432e-15	[7, 8, 9]	Group24	5.32319	14	[BLK, FGFR1, FGFR2, FGFR3, FGFR4, FGR, FYN, HCK, LCK, LYN, MUSK, TEK, TIE1, YES1]
GO:0005007	fibroblast growth factor receptor activity	GO_BiologicalProcess-EBI-UniProt-GOA-ACAP-ARAP_25.05.2022_00h00	2.54216e-09	8.08408e-07	1.36226e-16	3.81432e-15	[6, 7, 8, 9, 10, 11]	Group24	80	4	[FGFR1, FGFR2, FGFR3, FGFR4]
GO:0042509	regulation of tyrosine phosphorylation of STAT protein	GO_BiologicalProcess-EBI-UniProt-GOA-ACAP-ARAP_25.05.2022_00h00	0.000669159	0.0287738	1.36226e-16	3.81432e-15	[7, 8, 9, 10]	Group24	4.87805	4	[FGFR3, FYN, LYN, PPP2CA]
GO:0004714	transmembrane receptor protein tyrosine kinase activity	GO_BiologicalProcess-EBI-UniProt-GOA-ACAP-ARAP_25.05.2022_00h00	8.63279e-07	0.000181289	1.36226e-16	3.81432e-15	[8, 9, 10]	Group24	6.54206	7	[FGFR1, FGFR2, FGFR3, FGFR4, MUSK, TEK, TIE1]
GO:0043299	leukocyte degranulation	GO_BiologicalProcess-EBI-UniProt-GOA-ACAP-ARAP_25.05.2022_00h00	0.000949254	0.0322746	4.27999e-14	8.55999e-13	[3, 4, 6, 7, 8]	Group25	4.44444	4	[BLK, FGR, HCK, LYN]
GO:0002862	negative regulation of inflammatory response to antigenic stimulus	GO_BiologicalProcess-EBI-UniProt-GOA-ACAP-ARAP_25.05.2022_00h00	2.12651e-07	5.31628e-05	4.27999e-14	8.55999e-13	[4, 5, 6, 7, 8]	Group25	17.8571	5	[FGR, FYN, HCK, LYN, YES1]
GO:0001727	lipid kinase activity	GO_BiologicalProcess-EBI-UniProt-GOA-ACAP-ARAP_25.05.2022_00h00	3.77532e-05	0.00400184	4.27999e-14	8.55999e-13	[6, 7]	Group25	6.41026	5	[CDC42, FGFR3, FGR, LYN, TEK]
GO:0002431	Fc receptor mediated stimulatory signaling pathway	GO_BiologicalProcess-EBI-UniProt-GOA-ACAP-ARAP_25.05.2022_00h00	1.87543e-08	5.40124e-06	4.27999e-14	8.55999e-13	[5, 6, 7, 8, 9]	Group25	16.6667	6	[BLK, FGR, FYN, HCK, LYN, YES1]
GO:0002758	innate immune response-activating signal transduction	GO_BiologicalProcess-EBI-UniProt-GOA-ACAP-ARAP_25.05.2022_00h00	0.000585465	0.0263459	4.27999e-14	8.55999e-13	[4, 5, 6, 7, 8, 9, 10]	Group25	8.82353	3	[FYN, HCK, LYN]
GO:0038094	Fc-gamma receptor signaling pathway	GO_BiologicalProcess-EBI-UniProt-GOA-ACAP-ARAP_25.05.2022_00h00	3.105e-08	8.75611e-06	4.27999e-14	8.55999e-13	[6, 7, 8]	Group25	15.3846	6	[FGR, FYN, HCK, LCK, LYN, YES1]
GO:0060252	positive regulation of glial cell proliferation	GO_BiologicalProcess-EBI-UniProt-GOA-ACAP-ARAP_25.05.2022_00h00	9.99147e-05	0.00819301	4.27999e-14	8.55999e-13	[4, 5, 6, 7, 8, 9, 10]	Group25	15.7895	3	[KRAS, LYN, NRAS]
GO:0043304	regulation of mast cell degranulation	GO_BiologicalProcess-EBI-UniProt-GOA-ACAP-ARAP_25.05.2022_00h00	0.000488682	0.0234567	4.27999e-14	8.55999e-13	[5, 6, 7, 8, 9, 10]	Group25	9.375	3	[BLK, FGR, LYN]
GO:0004713	protein tyrosine kinase activity	GO_BiologicalProcess-EBI-UniProt-GOA-ACAP-ARAP_25.05.2022_00h00	3.25785e-11	1.16631e-08	4.27999e-14	8.55999e-13	[7, 8, 9]	Group25	5.32319	14	[BLK, FGFR1, FGFR2, FGFR3, FGFR4, FGR, FYN, HCK, LCK, LYN, MUSK, TEK, TIE1, YES1]
GO:0043552	positive regulation of phosphatidylinositol 3-kinase activity	GO_BiologicalProcess-EBI-UniProt-GOA-ACAP-ARAP_25.05.2022_00h00	5.88438e-07	0.000130633	4.27999e-14	8.55999e-13	[5, 6, 7, 8, 9, 10, 11, 12]	Group25	14.7059	5	[CDC42, FGFR3, FGR, LYN, TEK]
GO:0004715	non-membrane spanning protein tyrosine kinase activity	GO_BiologicalProcess-EBI-UniProt-GOA-ACAP-ARAP_25.05.2022_00h00	9.37825e-09	2.81348e-06	4.27999e-14	8.55999e-13	[8, 9, 10]	Group25	12.5	7	[BLK, FGR, FYN, HCK, LCK, LYN, YES1]
GO:0035004	phosphatidylinositol 3-kinase activity	GO_BiologicalProcess-EBI-UniProt-GOA-ACAP-ARAP_25.05.2022_00h00	2.2313e-05	0.00267756	4.27999e-14	8.55999e-13	[8, 9, 10]	Group25	7.14286	5	[CDC42, FGFR3, FGR, LYN, TEK]
GO:0044344	cellular response to fibroblast growth factor stimulus	GO_BiologicalProcess-EBI-UniProt-GOA-ACAP-ARAP_25.05.2022_00h00	0.000210837	0.0143369	1.63598e-13	3.10836e-12	[4, 6]	Group28	4.46429	5	[CPS1, FGFR1, FGFR2, FGFR3, FGFR4]
GO:0060425	lung morphogenesis	GO_BiologicalProcess-EBI-UniProt-GOA-ACAP-ARAP_25.05.2022_00h00	0.000115674	0.00902259	1.63598e-13	3.10836e-12	[4, 5, 6, 7]	Group28	7.69231	4	[CDC42, FGFR2, KRAS, NRAS]
GO:0060193	positive regulation of lipase activity	GO_BiologicalProcess-EBI-UniProt-GOA-ACAP-ARAP_25.05.2022_00h00	3.32912e-05	0.00359544	1.63598e-13	3.10836e-12	[6]	Group28	6.57895	5	[FGFR1, FGFR2, FGFR3, HRAS, RHOA]
GO:0005007	fibroblast growth factor receptor activity	GO_BiologicalProcess-EBI-UniProt-GOA-ACAP-ARAP_25.05.2022_00h00	2.54216e-09	8.08408e-07	1.63598e-13	3.10836e-12	[6, 7, 8, 9, 10, 11]	Group28	80	4	[FGFR1, FGFR2, FGFR3, FGFR4]
GO:0004714	transmembrane receptor protein tyrosine kinase activity	GO_BiologicalProcess-EBI-UniProt-GOA-ACAP-ARAP_25.05.2022_00h00	8.63279e-07	0.000181289	1.63598e-13	3.10836e-12	[8, 9, 10]	Group28	6.54206	7	[FGFR1, FGFR2, FGFR3, FGFR4, MUSK, TEK, TIE1]
GO:0045197	establishment or maintenance of epithelial cell apical/basal polarity	GO_BiologicalProcess-EBI-UniProt-GOA-ACAP-ARAP_25.05.2022_00h00	0.00238557	0.0381691	6.50036e-16	1.69009e-14	[5]	Group30	5.45455	3	[CDC42, CRB2, RHOA]
GO:0043299	leukocyte degranulation	GO_BiologicalProcess-EBI-UniProt-GOA-ACAP-ARAP_25.05.2022_00h00	0.000949254	0.0322746	6.50036e-16	1.69009e-14	[3, 4, 6, 7, 8]	Group30	4.44444	4	[BLK, FGR, HCK, LYN]
GO:0030901	midbrain development	GO_BiologicalProcess-EBI-UniProt-GOA-ACAP-ARAP_25.05.2022_00h00	0.000155841	0.0115322	6.50036e-16	1.69009e-14	[3, 5, 6, 7, 8]	Group30	4.7619	5	[CDC42, CNP, FGFR2, RHOA, YWHAH]
GO:0002862	negative regulation of inflammatory response to antigenic stimulus	GO_BiologicalProcess-EBI-UniProt-GOA-ACAP-ARAP_25.05.2022_00h00	2.12651e-07	5.31628e-05	6.50036e-16	1.69009e-14	[4, 5, 6, 7, 8]	Group30	17.8571	5	[FGR, FYN, HCK, LYN, YES1]
GO:0001727	lipid kinase activity	GO_BiologicalProcess-EBI-UniProt-GOA-ACAP-ARAP_25.05.2022_00h00	3.77532e-05	0.00400184	6.50036e-16	1.69009e-14	[6, 7]	Group30	6.41026	5	[CDC42, FGFR3, FGR, LYN, TEK]
GO:1900026	positive regulation of substrate adhesion-dependent cell spreading	GO_BiologicalProcess-EBI-UniProt-GOA-ACAP-ARAP_25.05.2022_00h00	0.00171067	0.0359241	6.50036e-16	1.69009e-14	[5, 6, 7, 8]	Group30	6.12245	3	[CDC42, RAC1, RAC3]
GO:1904646	cellular response to amyloid-beta	GO_BiologicalProcess-EBI-UniProt-GOA-ACAP-ARAP_25.05.2022_00h00	0.00125132	0.0337857	6.50036e-16	1.69009e-14	[6, 7]	Group30	6.81818	3	[CDK5, FYN, TLR6]
GO:0002758	innate immune response-activating signal transduction	GO_BiologicalProcess-EBI-UniProt-GOA-ACAP-ARAP_25.05.2022_00h00	0.000585465	0.0263459	6.50036e-16	1.69009e-14	[4, 5, 6, 7, 8, 9, 10]	Group30	8.82353	3	[FYN, HCK, LYN]
GO:0051893	regulation of focal adhesion assembly	GO_BiologicalProcess-EBI-UniProt-GOA-ACAP-ARAP_25.05.2022_00h00	0.000408344	0.0208255	6.50036e-16	1.69009e-14	[6, 7, 8]	Group30	5.55556	4	[FYN, RAC1, RHOA, TEK]
GO:2000251	positive regulation of actin cytoskeleton reorganization	GO_BiologicalProcess-EBI-UniProt-GOA-ACAP-ARAP_25.05.2022_00h00	4.52226e-08	1.2391e-05	6.50036e-16	1.69009e-14	[5, 6, 7, 8, 9]	Group30	23.8095	5	[CDC42, CDK5, HCK, HRAS, TEK]
GO:0060071	Wnt signaling pathway, planar cell polarity pathway	GO_BiologicalProcess-EBI-UniProt-GOA-ACAP-ARAP_25.05.2022_00h00	0.00277664	0.0360963	6.50036e-16	1.69009e-14	[6, 7, 8, 9]	Group30	5.17241	3	[CDC42, RAC1, RHOA]
GO:0090314	positive regulation of protein targeting to membrane	GO_BiologicalProcess-EBI-UniProt-GOA-ACAP-ARAP_25.05.2022_00h00	0.000488682	0.0234567	6.50036e-16	1.69009e-14	[5, 6, 7, 8, 9, 10, 11]	Group30	9.375	3	[CDK5, FYN, HRAS]
GO:0043552	positive regulation of phosphatidylinositol 3-kinase activity	GO_BiologicalProcess-EBI-UniProt-GOA-ACAP-ARAP_25.05.2022_00h00	5.88438e-07	0.000130633	6.50036e-16	1.69009e-14	[5, 6, 7, 8, 9, 10, 11, 12]	Group30	14.7059	5	[CDC42, FGFR3, FGR, LYN, TEK]
GO:0035004	phosphatidylinositol 3-kinase activity	GO_BiologicalProcess-EBI-UniProt-GOA-ACAP-ARAP_25.05.2022_00h00	2.2313e-05	0.00267756	6.50036e-16	1.69009e-14	[8, 9, 10]	Group30	7.14286	5	[CDC42, FGFR3, FGR, LYN, TEK]
GO:0051496	positive regulation of stress fiber assembly	GO_BiologicalProcess-EBI-UniProt-GOA-ACAP-ARAP_25.05.2022_00h00	0.00251185	0.0376778	6.50036e-16	1.69009e-14	[5, 6, 7, 8, 9, 10, 11, 12, 13]	Group30	5.35714	3	[CDC42, RAC1, RHOA]
GO:0005007	fibroblast growth factor receptor activity	GO_BiologicalProcess-EBI-UniProt-GOA-ACAP-ARAP_25.05.2022_00h00	2.54216e-09	8.08408e-07	1.37512e-14	3.02525e-13	[6, 7, 8, 9, 10, 11]	Group31	80	4	[FGFR1, FGFR2, FGFR3, FGFR4]
GO:0004714	transmembrane receptor protein tyrosine kinase activity	GO_BiologicalProcess-EBI-UniProt-GOA-ACAP-ARAP_25.05.2022_00h00	8.63279e-07	0.000181289	1.37512e-14	3.02525e-13	[8, 9, 10]	Group31	6.54206	7	[FGFR1, FGFR2, FGFR3, FGFR4, MUSK, TEK, TIE1]
GO:0045197	establishment or maintenance of epithelial cell apical/basal polarity	GO_BiologicalProcess-EBI-UniProt-GOA-ACAP-ARAP_25.05.2022_00h00	0.00238557	0.0381691	1.35092e-15	3.2422e-14	[5]	Group32	5.45455	3	[CDC42, CRB2, RHOA]
GO:0043299	leukocyte degranulation	GO_BiologicalProcess-EBI-UniProt-GOA-ACAP-ARAP_25.05.2022_00h00	0.000949254	0.0322746	1.35092e-15	3.2422e-14	[3, 4, 6, 7, 8]	Group32	4.44444	4	[BLK, FGR, HCK, LYN]
GO:0002862	negative regulation of inflammatory response to antigenic stimulus	GO_BiologicalProcess-EBI-UniProt-GOA-ACAP-ARAP_25.05.2022_00h00	2.12651e-07	5.31628e-05	1.35092e-15	3.2422e-14	[4, 5, 6, 7, 8]	Group32	17.8571	5	[FGR, FYN, HCK, LYN, YES1]
GO:0031295	T cell costimulation	GO_BiologicalProcess-EBI-UniProt-GOA-ACAP-ARAP_25.05.2022_00h00	7.12864e-05	0.00641578	1.35092e-15	3.2422e-14	[3, 6, 7, 8, 9]	Group32	8.69565	4	[FYN, LCK, LYN, YES1]
GO:0001727	lipid kinase activity	GO_BiologicalProcess-EBI-UniProt-GOA-ACAP-ARAP_25.05.2022_00h00	3.77532e-05	0.00400184	1.35092e-15	3.2422e-14	[6, 7]	Group32	6.41026	5	[CDC42, FGFR3, FGR, LYN, TEK]
GO:1900026	positive regulation of substrate adhesion-dependent cell spreading	GO_BiologicalProcess-EBI-UniProt-GOA-ACAP-ARAP_25.05.2022_00h00	0.00171067	0.0359241	1.35092e-15	3.2422e-14	[5, 6, 7, 8]	Group32	6.12245	3	[CDC42, RAC1, RAC3]
GO:0002431	Fc receptor mediated stimulatory signaling pathway	GO_BiologicalProcess-EBI-UniProt-GOA-ACAP-ARAP_25.05.2022_00h00	1.87543e-08	5.40124e-06	1.35092e-15	3.2422e-14	[5, 6, 7, 8, 9]	Group32	16.6667	6	[BLK, FGR, FYN, HCK, LYN, YES1]
GO:0002758	innate immune response-activating signal transduction	GO_BiologicalProcess-EBI-UniProt-GOA-ACAP-ARAP_25.05.2022_00h00	0.000585465	0.0263459	1.35092e-15	3.2422e-14	[4, 5, 6, 7, 8, 9, 10]	Group32	8.82353	3	[FYN, HCK, LYN]
GO:0038094	Fc-gamma receptor signaling pathway	GO_BiologicalProcess-EBI-UniProt-GOA-ACAP-ARAP_25.05.2022_00h00	3.105e-08	8.75611e-06	1.35092e-15	3.2422e-14	[6, 7, 8]	Group32	15.3846	6	[FGR, FYN, HCK, LCK, LYN, YES1]
GO:0051893	regulation of focal adhesion assembly	GO_BiologicalProcess-EBI-UniProt-GOA-ACAP-ARAP_25.05.2022_00h00	0.000408344	0.0208255	1.35092e-15	3.2422e-14	[6, 7, 8]	Group32	5.55556	4	[FYN, RAC1, RHOA, TEK]
GO:0043304	regulation of mast cell degranulation	GO_BiologicalProcess-EBI-UniProt-GOA-ACAP-ARAP_25.05.2022_00h00	0.000488682	0.0234567	1.35092e-15	3.2422e-14	[5, 6, 7, 8, 9, 10]	Group32	9.375	3	[BLK, FGR, LYN]
GO:0060071	Wnt signaling pathway, planar cell polarity pathway	GO_BiologicalProcess-EBI-UniProt-GOA-ACAP-ARAP_25.05.2022_00h00	0.00277664	0.0360963	1.35092e-15	3.2422e-14	[6, 7, 8, 9]	Group32	5.17241	3	[CDC42, RAC1, RHOA]
GO:0004713	protein tyrosine kinase activity	GO_BiologicalProcess-EBI-UniProt-GOA-ACAP-ARAP_25.05.2022_00h00	3.25785e-11	1.16631e-08	1.35092e-15	3.2422e-14	[7, 8, 9]	Group32	5.32319	14	[BLK, FGFR1, FGFR2, FGFR3, FGFR4, FGR, FYN, HCK, LCK, LYN, MUSK, TEK, TIE1, YES1]
GO:0005007	fibroblast growth factor receptor activity	GO_BiologicalProcess-EBI-UniProt-GOA-ACAP-ARAP_25.05.2022_00h00	2.54216e-09	8.08408e-07	1.35092e-15	3.2422e-14	[6, 7, 8, 9, 10, 11]	Group32	80	4	[FGFR1, FGFR2, FGFR3, FGFR4]
GO:0042509	regulation of tyrosine phosphorylation of STAT protein	GO_BiologicalProcess-EBI-UniProt-GOA-ACAP-ARAP_25.05.2022_00h00	0.000669159	0.0287738	1.35092e-15	3.2422e-14	[7, 8, 9, 10]	Group32	4.87805	4	[FGFR3, FYN, LYN, PPP2CA]
GO:0043552	positive regulation of phosphatidylinositol 3-kinase activity	GO_BiologicalProcess-EBI-UniProt-GOA-ACAP-ARAP_25.05.2022_00h00	5.88438e-07	0.000130633	1.35092e-15	3.2422e-14	[5, 6, 7, 8, 9, 10, 11, 12]	Group32	14.7059	5	[CDC42, FGFR3, FGR, LYN, TEK]
GO:0004714	transmembrane receptor protein tyrosine kinase activity	GO_BiologicalProcess-EBI-UniProt-GOA-ACAP-ARAP_25.05.2022_00h00	8.63279e-07	0.000181289	1.35092e-15	3.2422e-14	[8, 9, 10]	Group32	6.54206	7	[FGFR1, FGFR2, FGFR3, FGFR4, MUSK, TEK, TIE1]
GO:0004715	non-membrane spanning protein tyrosine kinase activity	GO_BiologicalProcess-EBI-UniProt-GOA-ACAP-ARAP_25.05.2022_00h00	9.37825e-09	2.81348e-06	1.35092e-15	3.2422e-14	[8, 9, 10]	Group32	12.5	7	[BLK, FGR, FYN, HCK, LCK, LYN, YES1]
GO:0035004	phosphatidylinositol 3-kinase activity	GO_BiologicalProcess-EBI-UniProt-GOA-ACAP-ARAP_25.05.2022_00h00	2.2313e-05	0.00267756	1.35092e-15	3.2422e-14	[8, 9, 10]	Group32	7.14286	5	[CDC42, FGFR3, FGR, LYN, TEK]
GO:0051496	positive regulation of stress fiber assembly	GO_BiologicalProcess-EBI-UniProt-GOA-ACAP-ARAP_25.05.2022_00h00	0.00251185	0.0376778	1.35092e-15	3.2422e-14	[5, 6, 7, 8, 9, 10, 11, 12, 13]	Group32	5.35714	3	[CDC42, RAC1, RHOA]
GO:0043299	leukocyte degranulation	GO_BiologicalProcess-EBI-UniProt-GOA-ACAP-ARAP_25.05.2022_00h00	0.000949254	0.0322746	1.06329e-23	3.61518e-22	[3, 4, 6, 7, 8]	Group33	4.44444	4	[BLK, FGR, HCK, LYN]
GO:0002862	negative regulation of inflammatory response to antigenic stimulus	GO_BiologicalProcess-EBI-UniProt-GOA-ACAP-ARAP_25.05.2022_00h00	2.12651e-07	5.31628e-05	1.06329e-23	3.61518e-22	[4, 5, 6, 7, 8]	Group33	17.8571	5	[FGR, FYN, HCK, LYN, YES1]
GO:1900026	positive regulation of substrate adhesion-dependent cell spreading	GO_BiologicalProcess-EBI-UniProt-GOA-ACAP-ARAP_25.05.2022_00h00	0.00171067	0.0359241	1.06329e-23	3.61518e-22	[5, 6, 7, 8]	Group33	6.12245	3	[CDC42, RAC1, RAC3]
GO:0002758	innate immune response-activating signal transduction	GO_BiologicalProcess-EBI-UniProt-GOA-ACAP-ARAP_25.05.2022_00h00	0.000585465	0.0263459	1.06329e-23	3.61518e-22	[4, 5, 6, 7, 8, 9, 10]	Group33	8.82353	3	[FYN, HCK, LYN]
GO:0005980	glycogen catabolic process	GO_BiologicalProcess-EBI-UniProt-GOA-ACAP-ARAP_25.05.2022_00h00	5.83527e-05	0.00554351	1.06329e-23	3.61518e-22	[6, 7, 8]	Group33	18.75	3	[PPP1CA, PYGB, PYGM]
GO:0051893	regulation of focal adhesion assembly	GO_BiologicalProcess-EBI-UniProt-GOA-ACAP-ARAP_25.05.2022_00h00	0.000408344	0.0208255	1.06329e-23	3.61518e-22	[6, 7, 8]	Group33	5.55556	4	[FYN, RAC1, RHOA, TEK]
GO:0060252	positive regulation of glial cell proliferation	GO_BiologicalProcess-EBI-UniProt-GOA-ACAP-ARAP_25.05.2022_00h00	9.99147e-05	0.00819301	1.06329e-23	3.61518e-22	[4, 5, 6, 7, 8, 9, 10]	Group33	15.7895	3	[KRAS, LYN, NRAS]
GO:0060071	Wnt signaling pathway, planar cell polarity pathway	GO_BiologicalProcess-EBI-UniProt-GOA-ACAP-ARAP_25.05.2022_00h00	0.00277664	0.0360963	1.06329e-23	3.61518e-22	[6, 7, 8, 9]	Group33	5.17241	3	[CDC42, RAC1, RHOA]
GO:0042509	regulation of tyrosine phosphorylation of STAT protein	GO_BiologicalProcess-EBI-UniProt-GOA-ACAP-ARAP_25.05.2022_00h00	0.000669159	0.0287738	1.06329e-23	3.61518e-22	[7, 8, 9, 10]	Group33	4.87805	4	[FGFR3, FYN, LYN, PPP2CA]
GO:0051496	positive regulation of stress fiber assembly	GO_BiologicalProcess-EBI-UniProt-GOA-ACAP-ARAP_25.05.2022_00h00	0.00251185	0.0376778	1.06329e-23	3.61518e-22	[5, 6, 7, 8, 9, 10, 11, 12, 13]	Group33	5.35714	3	[CDC42, RAC1, RHOA]
GO:0048169	regulation of long-term neuronal synaptic plasticity	GO_BiologicalProcess-EBI-UniProt-GOA-ACAP-ARAP_25.05.2022_00h00	0.000293268	0.0173028	8.38942e-20	2.76851e-18	[5, 7, 8, 9, 10, 11]	Group34	11.1111	3	[HRAS, KRAS, NRAS]
GO:0044344	cellular response to fibroblast growth factor stimulus	GO_BiologicalProcess-EBI-UniProt-GOA-ACAP-ARAP_25.05.2022_00h00	0.000210837	0.0143369	1.02189e-19	3.27005e-18	[4, 6]	Group35	4.46429	5	[CPS1, FGFR1, FGFR2, FGFR3, FGFR4]
GO:0045197	establishment or maintenance of epithelial cell apical/basal polarity	GO_BiologicalProcess-EBI-UniProt-GOA-ACAP-ARAP_25.05.2022_00h00	0.00238557	0.0381691	1.02189e-19	3.27005e-18	[5]	Group35	5.45455	3	[CDC42, CRB2, RHOA]
GO:0046902	regulation of mitochondrial membrane permeability	GO_BiologicalProcess-EBI-UniProt-GOA-ACAP-ARAP_25.05.2022_00h00	0.000244397	0.0156414	1.02189e-19	3.27005e-18	[4, 5, 6, 7]	Group35	6.34921	4	[CNP, SLC25A31, SLC25A4, SLC25A6]
GO:0060425	lung morphogenesis	GO_BiologicalProcess-EBI-UniProt-GOA-ACAP-ARAP_25.05.2022_00h00	0.000115674	0.00902259	1.02189e-19	3.27005e-18	[4, 5, 6, 7]	Group35	7.69231	4	[CDC42, FGFR2, KRAS, NRAS]
GO:0030901	midbrain development	GO_BiologicalProcess-EBI-UniProt-GOA-ACAP-ARAP_25.05.2022_00h00	0.000155841	0.0115322	1.02189e-19	3.27005e-18	[3, 5, 6, 7, 8]	Group35	4.7619	5	[CDC42, CNP, FGFR2, RHOA, YWHAH]
GO:0002862	negative regulation of inflammatory response to antigenic stimulus	GO_BiologicalProcess-EBI-UniProt-GOA-ACAP-ARAP_25.05.2022_00h00	2.12651e-07	5.31628e-05	1.02189e-19	3.27005e-18	[4, 5, 6, 7, 8]	Group35	17.8571	5	[FGR, FYN, HCK, LYN, YES1]
GO:0008542	visual learning	GO_BiologicalProcess-EBI-UniProt-GOA-ACAP-ARAP_25.05.2022_00h00	0.00203066	0.0365519	1.02189e-19	3.27005e-18	[4, 6, 8]	Group35	5.76923	3	[CDK5, KRAS, NRAS]
GO:0060193	positive regulation of lipase activity	GO_BiologicalProcess-EBI-UniProt-GOA-ACAP-ARAP_25.05.2022_00h00	3.32912e-05	0.00359544	1.02189e-19	3.27005e-18	[6]	Group35	6.57895	5	[FGFR1, FGFR2, FGFR3, HRAS, RHOA]
GO:0031295	T cell costimulation	GO_BiologicalProcess-EBI-UniProt-GOA-ACAP-ARAP_25.05.2022_00h00	7.12864e-05	0.00641578	1.02189e-19	3.27005e-18	[3, 6, 7, 8, 9]	Group35	8.69565	4	[FYN, LCK, LYN, YES1]
GO:1900026	positive regulation of substrate adhesion-dependent cell spreading	GO_BiologicalProcess-EBI-UniProt-GOA-ACAP-ARAP_25.05.2022_00h00	0.00171067	0.0359241	1.02189e-19	3.27005e-18	[5, 6, 7, 8]	Group35	6.12245	3	[CDC42, RAC1, RAC3]
GO:1904646	cellular response to amyloid-beta	GO_BiologicalProcess-EBI-UniProt-GOA-ACAP-ARAP_25.05.2022_00h00	0.00125132	0.0337857	1.02189e-19	3.27005e-18	[6, 7]	Group35	6.81818	3	[CDK5, FYN, TLR6]
GO:0140021	mitochondrial ADP transmembrane transport	GO_BiologicalProcess-EBI-UniProt-GOA-ACAP-ARAP_25.05.2022_00h00	2.15848e-06	0.000395002	1.02189e-19	3.27005e-18	[4, 5, 6, 7, 8, 10]	Group35	50	3	[SLC25A31, SLC25A4, SLC25A6]
GO:1990544	mitochondrial ATP transmembrane transport	GO_BiologicalProcess-EBI-UniProt-GOA-ACAP-ARAP_25.05.2022_00h00	2.15848e-06	0.000395002	1.02189e-19	3.27005e-18	[4, 5, 6, 7, 8, 10]	Group35	50	3	[SLC25A31, SLC25A4, SLC25A6]
GO:0002431	Fc receptor mediated stimulatory signaling pathway	GO_BiologicalProcess-EBI-UniProt-GOA-ACAP-ARAP_25.05.2022_00h00	1.87543e-08	5.40124e-06	1.02189e-19	3.27005e-18	[5, 6, 7, 8, 9]	Group35	16.6667	6	[BLK, FGR, FYN, HCK, LYN, YES1]
GO:0002758	innate immune response-activating signal transduction	GO_BiologicalProcess-EBI-UniProt-GOA-ACAP-ARAP_25.05.2022_00h00	0.000585465	0.0263459	1.02189e-19	3.27005e-18	[4, 5, 6, 7, 8, 9, 10]	Group35	8.82353	3	[FYN, HCK, LYN]
GO:0005980	glycogen catabolic process	GO_BiologicalProcess-EBI-UniProt-GOA-ACAP-ARAP_25.05.2022_00h00	5.83527e-05	0.00554351	1.02189e-19	3.27005e-18	[6, 7, 8]	Group35	18.75	3	[PPP1CA, PYGB, PYGM]
GO:0038094	Fc-gamma receptor signaling pathway	GO_BiologicalProcess-EBI-UniProt-GOA-ACAP-ARAP_25.05.2022_00h00	3.105e-08	8.75611e-06	1.02189e-19	3.27005e-18	[6, 7, 8]	Group35	15.3846	6	[FGR, FYN, HCK, LCK, LYN, YES1]
GO:0051893	regulation of focal adhesion assembly	GO_BiologicalProcess-EBI-UniProt-GOA-ACAP-ARAP_25.05.2022_00h00	0.000408344	0.0208255	1.02189e-19	3.27005e-18	[6, 7, 8]	Group35	5.55556	4	[FYN, RAC1, RHOA, TEK]
GO:0060252	positive regulation of glial cell proliferation	GO_BiologicalProcess-EBI-UniProt-GOA-ACAP-ARAP_25.05.2022_00h00	9.99147e-05	0.00819301	1.02189e-19	3.27005e-18	[4, 5, 6, 7, 8, 9, 10]	Group35	15.7895	3	[KRAS, LYN, NRAS]
GO:2000251	positive regulation of actin cytoskeleton reorganization	GO_BiologicalProcess-EBI-UniProt-GOA-ACAP-ARAP_25.05.2022_00h00	4.52226e-08	1.2391e-05	1.02189e-19	3.27005e-18	[5, 6, 7, 8, 9]	Group35	23.8095	5	[CDC42, CDK5, HCK, HRAS, TEK]
GO:0060071	Wnt signaling pathway, planar cell polarity pathway	GO_BiologicalProcess-EBI-UniProt-GOA-ACAP-ARAP_25.05.2022_00h00	0.00277664	0.0360963	1.02189e-19	3.27005e-18	[6, 7, 8, 9]	Group35	5.17241	3	[CDC42, RAC1, RHOA]
GO:0097345	mitochondrial outer membrane permeabilization	GO_BiologicalProcess-EBI-UniProt-GOA-ACAP-ARAP_25.05.2022_00h00	0.000693702	0.0291355	1.02189e-19	3.27005e-18	[4, 5, 6, 7, 8, 9, 10, 11]	Group35	8.33333	3	[SLC25A31, SLC25A4, SLC25A6]
GO:0004713	protein tyrosine kinase activity	GO_BiologicalProcess-EBI-UniProt-GOA-ACAP-ARAP_25.05.2022_00h00	3.25785e-11	1.16631e-08	1.02189e-19	3.27005e-18	[7, 8, 9]	Group35	5.32319	14	[BLK, FGFR1, FGFR2, FGFR3, FGFR4, FGR, FYN, HCK, LCK, LYN, MUSK, TEK, TIE1, YES1]
GO:0090314	positive regulation of protein targeting to membrane	GO_BiologicalProcess-EBI-UniProt-GOA-ACAP-ARAP_25.05.2022_00h00	0.000488682	0.0234567	1.02189e-19	3.27005e-18	[5, 6, 7, 8, 9, 10, 11]	Group35	9.375	3	[CDK5, FYN, HRAS]
GO:0048169	regulation of long-term neuronal synaptic plasticity	GO_BiologicalProcess-EBI-UniProt-GOA-ACAP-ARAP_25.05.2022_00h00	0.000293268	0.0173028	1.02189e-19	3.27005e-18	[5, 7, 8, 9, 10, 11]	Group35	11.1111	3	[HRAS, KRAS, NRAS]
GO:0005007	fibroblast growth factor receptor activity	GO_BiologicalProcess-EBI-UniProt-GOA-ACAP-ARAP_25.05.2022_00h00	2.54216e-09	8.08408e-07	1.02189e-19	3.27005e-18	[6, 7, 8, 9, 10, 11]	Group35	80	4	[FGFR1, FGFR2, FGFR3, FGFR4]
GO:0042509	regulation of tyrosine phosphorylation of STAT protein	GO_BiologicalProcess-EBI-UniProt-GOA-ACAP-ARAP_25.05.2022_00h00	0.000669159	0.0287738	1.02189e-19	3.27005e-18	[7, 8, 9, 10]	Group35	4.87805	4	[FGFR3, FYN, LYN, PPP2CA]
GO:0004714	transmembrane receptor protein tyrosine kinase activity	GO_BiologicalProcess-EBI-UniProt-GOA-ACAP-ARAP_25.05.2022_00h00	8.63279e-07	0.000181289	1.02189e-19	3.27005e-18	[8, 9, 10]	Group35	6.54206	7	[FGFR1, FGFR2, FGFR3, FGFR4, MUSK, TEK, TIE1]
GO:0004715	non-membrane spanning protein tyrosine kinase activity	GO_BiologicalProcess-EBI-UniProt-GOA-ACAP-ARAP_25.05.2022_00h00	9.37825e-09	2.81348e-06	1.02189e-19	3.27005e-18	[8, 9, 10]	Group35	12.5	7	[BLK, FGR, FYN, HCK, LCK, LYN, YES1]
GO:0051496	positive regulation of stress fiber assembly	GO_BiologicalProcess-EBI-UniProt-GOA-ACAP-ARAP_25.05.2022_00h00	0.00251185	0.0376778	1.02189e-19	3.27005e-18	[5, 6, 7, 8, 9, 10, 11, 12, 13]	Group35	5.35714	3	[CDC42, RAC1, RHOA]
GO:1901029	negative regulation of mitochondrial outer membrane permeabilization involved in apoptotic signaling pathway	GO_BiologicalProcess-EBI-UniProt-GOA-ACAP-ARAP_25.05.2022_00h00	3.01168e-05	0.00334297	1.02189e-19	3.27005e-18	[5, 6, 7, 8, 9, 10, 11, 12, 13]	Group35	23.0769	3	[SLC25A31, SLC25A4, SLC25A6]
GO:0005471	ATP:ADP antiporter activity	GO_BiologicalProcess-EBI-UniProt-GOA-ACAP-ARAP_25.05.2022_00h00	3.76409e-06	0.000639895	1.02189e-19	3.27005e-18	[7, 8, 9, 10, 11, 12]	Group35	42.8571	3	[SLC25A31, SLC25A4, SLC25A6]
GO:0008024	cyclin/CDK positive transcription elongation factor complex	GO_CellularComponent-EBI-UniProt-GOA-ACAP-ARAP_25.05.2022_00h00	6.00143e-06	0.00092422	0.00227016	0.00227016	[4, 8, 9]	Group04	37.5	3	[CDK12, CDK13, CDK9]
GO:0031105	septin complex	GO_CellularComponent-EBI-UniProt-GOA-ACAP-ARAP_25.05.2022_00h00	4.56974e-09	1.42119e-06	5.80504e-08	5.80504e-07	[2, 4, 5, 7]	Group06	35.7143	5	[SEPTIN11, SEPTIN14, SEPTIN7, SEPTIN8, SEPTIN9]
GO:0005940	septin ring	GO_CellularComponent-EBI-UniProt-GOA-ACAP-ARAP_25.05.2022_00h00	4.56974e-09	1.42119e-06	5.80504e-08	5.80504e-07	[4, 5, 6, 7]	Group06	35.7143	5	[SEPTIN11, SEPTIN14, SEPTIN7, SEPTIN8, SEPTIN9]
GO:0001725	stress fiber	GO_CellularComponent-EBI-UniProt-GOA-ACAP-ARAP_25.05.2022_00h00	0.00055381	0.0254753	5.80504e-08	5.80504e-07	[3, 4, 8, 9]	Group06	5.12821	4	[SEPTIN11, SEPTIN7, SEPTIN9, TEK]
GO:0000307	cyclin-dependent protein kinase holoenzyme complex	GO_CellularComponent-EBI-UniProt-GOA-ACAP-ARAP_25.05.2022_00h00	1.49304e-15	5.70342e-13	3.76276e-13	6.77297e-12	[7]	Group07	20.3704	11	[CDK1, CDK12, CDK13, CDK14, CDK16, CDK2, CDK3, CDK4, CDK5, CDK6, CDK9]
GO:0042470	melanosome	GO_CellularComponent-EBI-UniProt-GOA-ACAP-ARAP_25.05.2022_00h00	0.000268786	0.0166647	5.29013e-07	4.23211e-06	[5, 6, 8]	Group09	4.23729	5	[ATP6V1B2, CNP, RAC1, YWHAB, YWHAZ]
GO:0019898	extrinsic component of membrane	GO_CellularComponent-EBI-UniProt-GOA-ACAP-ARAP_25.05.2022_00h00	1.19483e-09	3.91905e-07	7.93847e-11	1.19077e-09	[2, 3]	Group15	4.04624	14	[BLK, CDK16, FGR, FYN, HCK, KRAS, LCK, LYN, NRAS, RAC1, RHOA, RPS27A, TPR, YES1]
GO:0031105	septin complex	GO_CellularComponent-EBI-UniProt-GOA-ACAP-ARAP_25.05.2022_00h00	4.56974e-09	1.42119e-06	3.34622e-16	9.03481e-15	[2, 4, 5, 7]	Group18	35.7143	5	[SEPTIN11, SEPTIN14, SEPTIN7, SEPTIN8, SEPTIN9]
GO:0005940	septin ring	GO_CellularComponent-EBI-UniProt-GOA-ACAP-ARAP_25.05.2022_00h00	4.56974e-09	1.42119e-06	3.34622e-16	9.03481e-15	[4, 5, 6, 7]	Group18	35.7143	5	[SEPTIN11, SEPTIN14, SEPTIN7, SEPTIN8, SEPTIN9]
GO:0000307	cyclin-dependent protein kinase holoenzyme complex	GO_CellularComponent-EBI-UniProt-GOA-ACAP-ARAP_25.05.2022_00h00	1.49304e-15	5.70342e-13	6.72002e-27	2.35201e-25	[7]	Group20	20.3704	11	[CDK1, CDK12, CDK13, CDK14, CDK16, CDK2, CDK3, CDK4, CDK5, CDK6, CDK9]
GO:0019898	extrinsic component of membrane	GO_CellularComponent-EBI-UniProt-GOA-ACAP-ARAP_25.05.2022_00h00	1.19483e-09	3.91905e-07	4.27999e-14	8.55999e-13	[2, 3]	Group25	4.04624	14	[BLK, CDK16, FGR, FYN, HCK, KRAS, LCK, LYN, NRAS, RAC1, RHOA, RPS27A, TPR, YES1]
GO:0031234	extrinsic component of cytoplasmic side of plasma membrane	GO_CellularComponent-EBI-UniProt-GOA-ACAP-ARAP_25.05.2022_00h00	1.35137e-13	5.04062e-11	4.27999e-14	8.55999e-13	[4, 5, 6]	Group25	11.215	12	[BLK, CDK16, FGR, FYN, HCK, KRAS, LCK, LYN, NRAS, RAC1, RHOA, YES1]
GO:0042470	melanosome	GO_CellularComponent-EBI-UniProt-GOA-ACAP-ARAP_25.05.2022_00h00	0.000268786	0.0166647	1.17968e-17	3.65701e-16	[5, 6, 8]	Group27	4.23729	5	[ATP6V1B2, CNP, RAC1, YWHAB, YWHAZ]
GO:0042470	melanosome	GO_CellularComponent-EBI-UniProt-GOA-ACAP-ARAP_25.05.2022_00h00	0.000268786	0.0166647	6.50036e-16	1.69009e-14	[5, 6, 8]	Group30	4.23729	5	[ATP6V1B2, CNP, RAC1, YWHAB, YWHAZ]
GO:0019898	extrinsic component of membrane	GO_CellularComponent-EBI-UniProt-GOA-ACAP-ARAP_25.05.2022_00h00	1.19483e-09	3.91905e-07	1.35092e-15	3.2422e-14	[2, 3]	Group32	4.04624	14	[BLK, CDK16, FGR, FYN, HCK, KRAS, LCK, LYN, NRAS, RAC1, RHOA, RPS27A, TPR, YES1]
GO:0031234	extrinsic component of cytoplasmic side of plasma membrane	GO_CellularComponent-EBI-UniProt-GOA-ACAP-ARAP_25.05.2022_00h00	1.35137e-13	5.04062e-11	1.35092e-15	3.2422e-14	[4, 5, 6]	Group32	11.215	12	[BLK, CDK16, FGR, FYN, HCK, KRAS, LCK, LYN, NRAS, RAC1, RHOA, YES1]
GO:0042470	melanosome	GO_CellularComponent-EBI-UniProt-GOA-ACAP-ARAP_25.05.2022_00h00	0.000268786	0.0166647	1.06329e-23	3.61518e-22	[5, 6, 8]	Group33	4.23729	5	[ATP6V1B2, CNP, RAC1, YWHAB, YWHAZ]
GO:0019898	extrinsic component of membrane	GO_CellularComponent-EBI-UniProt-GOA-ACAP-ARAP_25.05.2022_00h00	1.19483e-09	3.91905e-07	1.02189e-19	3.27005e-18	[2, 3]	Group35	4.04624	14	[BLK, CDK16, FGR, FYN, HCK, KRAS, LCK, LYN, NRAS, RAC1, RHOA, RPS27A, TPR, YES1]
GO:0031234	extrinsic component of cytoplasmic side of plasma membrane	GO_CellularComponent-EBI-UniProt-GOA-ACAP-ARAP_25.05.2022_00h00	1.35137e-13	5.04062e-11	1.02189e-19	3.27005e-18	[4, 5, 6]	Group35	11.215	12	[BLK, CDK16, FGR, FYN, HCK, KRAS, LCK, LYN, NRAS, RAC1, RHOA, YES1]
GO:0004550	nucleoside diphosphate kinase activity	GO_MolecularFunction-EBI-UniProt-GOA-ACAP-ARAP_25.05.2022_00h00	0.00013618	0.0102135	0.00075228	0.00225684	[5, 6]	Group03	14.2857	3	[AK2, AK9, NME2]
GO:0030170	pyridoxal phosphate binding	GO_MolecularFunction-EBI-UniProt-GOA-ACAP-ARAP_25.05.2022_00h00	0.00335633	0.0335633	9.84215e-07	5.90529e-06	[4, 5]	Group05	4.83871	3	[GOT2, PYGB, PYGM]
GO:0051219	phosphoprotein binding	GO_MolecularFunction-EBI-UniProt-GOA-ACAP-ARAP_25.05.2022_00h00	5.08557e-07	0.000114425	4.27999e-14	8.55999e-13	[3]	Group25	7.07071	7	[FGR, HCK, LCK, LYN, SFN, YES1, YWHAB]
GO:0045309	protein phosphorylated amino acid binding	GO_MolecularFunction-EBI-UniProt-GOA-ACAP-ARAP_25.05.2022_00h00	1.04596e-05	0.00145388	4.27999e-14	8.55999e-13	[4]	Group25	8.33333	5	[FGR, HCK, LCK, YES1, YWHAB]
GO:0051219	phosphoprotein binding	GO_MolecularFunction-EBI-UniProt-GOA-ACAP-ARAP_25.05.2022_00h00	5.08557e-07	0.000114425	1.35092e-15	3.2422e-14	[3]	Group32	7.07071	7	[FGR, HCK, LCK, LYN, SFN, YES1, YWHAB]
GO:0045309	protein phosphorylated amino acid binding	GO_MolecularFunction-EBI-UniProt-GOA-ACAP-ARAP_25.05.2022_00h00	1.04596e-05	0.00145388	1.35092e-15	3.2422e-14	[4]	Group32	8.33333	5	[FGR, HCK, LCK, YES1, YWHAB]
GO:0030170	pyridoxal phosphate binding	GO_MolecularFunction-EBI-UniProt-GOA-ACAP-ARAP_25.05.2022_00h00	0.00335633	0.0335633	1.06329e-23	3.61518e-22	[4, 5]	Group33	4.83871	3	[GOT2, PYGB, PYGM]
GO:0030170	pyridoxal phosphate binding	GO_MolecularFunction-EBI-UniProt-GOA-ACAP-ARAP_25.05.2022_00h00	0.00335633	0.0335633	1.02189e-19	3.27005e-18	[4, 5]	Group35	4.83871	3	[GOT2, PYGB, PYGM]
KEGG:00250	Alanine, aspartate and glutamate metabolism	KEGG_25.05.2022	0.00075228	0.0293389	0.00075228	0.00225684	[-1]	Group00	8.10811	3	[CPS1, GFPT1, GOT2]
KEGG:03015	mRNA surveillance pathway	KEGG_25.05.2022	0.00125454	0.032618	0.000258375	0.0010335	[-1]	Group02	4.12371	4	[DDX39B, PABPC4, PPP1CA, PPP2CA]
KEGG:04910	Insulin signaling pathway	KEGG_25.05.2022	5.34875e-05	0.00518828	9.84215e-07	5.90529e-06	[-1]	Group05	4.37956	6	[HRAS, KRAS, NRAS, PPP1CA, PYGB, PYGM]
KEGG:05100	Bacterial invasion of epithelial cells	KEGG_25.05.2022	1.94688e-06	0.000362119	5.80504e-08	5.80504e-07	[-1]	Group06	7.79221	6	[CDC42, RAC1, RHOA, SEPTIN11, SEPTIN8, SEPTIN9]
KEGG:04115	p53 signaling pathway	KEGG_25.05.2022	2.7377e-05	0.0030936	3.76276e-13	6.77297e-12	[-1]	Group07	6.84932	5	[CDK1, CDK2, CDK4, CDK6, SFN]
KEGG:05100	Bacterial invasion of epithelial cells	KEGG_25.05.2022	1.94688e-06	0.000362119	7.31239e-13	1.24311e-11	[-1]	Group08	7.79221	6	[CDC42, RAC1, RHOA, SEPTIN11, SEPTIN8, SEPTIN9]
KEGG:05131	Shigellosis	KEGG_25.05.2022	1.99256e-10	6.95404e-08	7.31239e-13	1.24311e-11	[-1]	Group08	5.26316	13	[CDC42, H3-3A, H3-4, H3-5, H3C14, RAC1, RHOA, RPS27A, SEPTIN11, SEPTIN7, SEPTIN8, SEPTIN9, UBA52]
KEGG:05120	Epithelial cell signaling in Helicobacter pylori infection	KEGG_25.05.2022	0.00036662	0.0194309	5.29013e-07	4.23211e-06	[-1]	Group09	5.71429	4	[ATP6V1B2, CDC42, LYN, RAC1]
KEGG:04666	Fc gamma R-mediated phagocytosis	KEGG_25.05.2022	0.00125454	0.032618	1.54335e-07	1.38901e-06	[-1]	Group10	4.12371	4	[CDC42, HCK, LYN, RAC1]
KEGG:04912	GnRH signaling pathway	KEGG_25.05.2022	0.0010728	0.032184	1.54335e-07	1.38901e-06	[-1]	Group10	4.30108	4	[CDC42, HRAS, KRAS, NRAS]
KEGG:05166	Human T-cell leukemia virus 1 infection	KEGG_25.05.2022	1.28427e-06	0.000254286	2.32924e-10	3.02802e-09	[-1]	Group11	4.05405	9	[CDK2, CDK4, HRAS, KRAS, LCK, NRAS, SLC25A31, SLC25A4, SLC25A6]
KEGG:04666	Fc gamma R-mediated phagocytosis	KEGG_25.05.2022	0.00125454	0.032618	8.75385e-07	6.12769e-06	[-1]	Group13	4.12371	4	[CDC42, HCK, LYN, RAC1]
KEGG:05120	Epithelial cell signaling in Helicobacter pylori infection	KEGG_25.05.2022	0.00036662	0.0194309	8.75385e-07	6.12769e-06	[-1]	Group13	5.71429	4	[ATP6V1B2, CDC42, LYN, RAC1]
KEGG:04360	Axon guidance	KEGG_25.05.2022	2.42584e-07	5.94331e-05	1.70456e-10	2.38638e-09	[-1]	Group14	4.94506	9	[CDC42, CDK5, FYN, HRAS, KRAS, NRAS, RAC1, RAC3, RHOA]
KEGG:04110	Cell cycle	KEGG_25.05.2022	1.00924e-08	3.01763e-06	5.52784e-09	6.6334e-08	[-1]	Group16	7.14286	9	[CDK1, CDK2, CDK4, CDK6, SFN, YWHAB, YWHAG, YWHAH, YWHAZ]
KEGG:04114	Oocyte meiosis	KEGG_25.05.2022	2.3386e-07	5.77635e-05	5.52784e-09	6.6334e-08	[-1]	Group16	6.10687	8	[CDK1, CDK2, PPP1CA, PPP2CA, YWHAB, YWHAG, YWHAH, YWHAZ]
KEGG:04115	p53 signaling pathway	KEGG_25.05.2022	2.7377e-05	0.0030936	5.52784e-09	6.6334e-08	[-1]	Group16	6.84932	5	[CDK1, CDK2, CDK4, CDK6, SFN]
KEGG:04115	p53 signaling pathway	KEGG_25.05.2022	2.7377e-05	0.0030936	7.07311e-17	2.0512e-15	[-1]	Group17	6.84932	5	[CDK1, CDK2, CDK4, CDK6, SFN]
KEGG:04218	Cellular senescence	KEGG_25.05.2022	2.42704e-10	8.44608e-08	7.07311e-17	2.0512e-15	[-1]	Group17	7.05128	11	[CDK1, CDK2, CDK4, CDK6, HRAS, KRAS, NRAS, PPP1CA, SLC25A31, SLC25A4, SLC25A6]
KEGG:04720	Long-term potentiation	KEGG_25.05.2022	0.000309881	0.0176632	7.07311e-17	2.0512e-15	[-1]	Group17	5.97015	4	[HRAS, KRAS, NRAS, PPP1CA]
KEGG:04910	Insulin signaling pathway	KEGG_25.05.2022	5.34875e-05	0.00518828	7.07311e-17	2.0512e-15	[-1]	Group17	4.37956	6	[HRAS, KRAS, NRAS, PPP1CA, PYGB, PYGM]
KEGG:04933	AGE-RAGE signaling pathway in diabetic complications	KEGG_25.05.2022	8.95325e-06	0.00128031	7.07311e-17	2.0512e-15	[-1]	Group17	6	6	[CDC42, CDK4, HRAS, KRAS, NRAS, RAC1]
KEGG:05160	Hepatitis C	KEGG_25.05.2022	2.59962e-10	9.02069e-08	7.07311e-17	2.0512e-15	[-1]	Group17	7.00637	11	[CDK2, CDK4, CDK6, HRAS, KRAS, NRAS, PPP2CA, YWHAB, YWHAG, YWHAH, YWHAZ]
KEGG:05166	Human T-cell leukemia virus 1 infection	KEGG_25.05.2022	1.28427e-06	0.000254286	7.07311e-17	2.0512e-15	[-1]	Group17	4.05405	9	[CDK2, CDK4, HRAS, KRAS, LCK, NRAS, SLC25A31, SLC25A4, SLC25A6]
KEGG:05167	Kaposi sarcoma-associated herpesvirus infection	KEGG_25.05.2022	3.38865e-08	9.48823e-06	7.07311e-17	2.0512e-15	[-1]	Group17	5.15464	10	[CDK4, CDK6, HCK, HRAS, KRAS, LYN, NRAS, RAC1, RPS27A, UBA52]
KEGG:05203	Viral carcinogenesis	KEGG_25.05.2022	5.56967e-14	2.09977e-11	7.07311e-17	2.0512e-15	[-1]	Group17	7.35294	15	[CDC42, CDK1, CDK2, CDK4, CDK6, HRAS, KRAS, LYN, NRAS, RAC1, RHOA, YWHAB, YWHAG, YWHAH, YWHAZ]
KEGG:05214	Glioma	KEGG_25.05.2022	3.12195e-05	0.00343415	7.07311e-17	2.0512e-15	[-1]	Group17	6.66667	5	[CDK4, CDK6, HRAS, KRAS, NRAS]
KEGG:05215	Prostate cancer	KEGG_25.05.2022	7.50875e-06	0.00110379	7.07311e-17	2.0512e-15	[-1]	Group17	6.18557	6	[CDK2, FGFR1, FGFR2, HRAS, KRAS, NRAS]
KEGG:05218	Melanoma	KEGG_25.05.2022	1.30808e-06	0.000257691	7.07311e-17	2.0512e-15	[-1]	Group17	8.33333	6	[CDK4, CDK6, FGFR1, HRAS, KRAS, NRAS]
KEGG:05219	Bladder cancer	KEGG_25.05.2022	1.54301e-06	0.000294715	7.07311e-17	2.0512e-15	[-1]	Group17	12.1951	5	[CDK4, FGFR3, HRAS, KRAS, NRAS]
KEGG:05220	Chronic myeloid leukemia	KEGG_25.05.2022	3.32912e-05	0.00359544	7.07311e-17	2.0512e-15	[-1]	Group17	6.57895	5	[CDK4, CDK6, HRAS, KRAS, NRAS]
KEGG:05223	Non-small cell lung cancer	KEGG_25.05.2022	2.55991e-05	0.00296949	7.07311e-17	2.0512e-15	[-1]	Group17	6.94444	5	[CDK4, CDK6, HRAS, KRAS, NRAS]
KEGG:05224	Breast cancer	KEGG_25.05.2022	7.91325e-05	0.00688453	7.07311e-17	2.0512e-15	[-1]	Group17	4.08163	6	[CDK4, CDK6, FGFR1, HRAS, KRAS, NRAS]
KEGG:04520	Adherens junction	KEGG_25.05.2022	5.0704e-08	1.38422e-05	3.34622e-16	9.03481e-15	[-1]	Group18	9.85915	7	[CDC42, FGFR1, FYN, RAC1, RAC3, RHOA, YES1]
KEGG:04722	Neurotrophin signaling pathway	KEGG_25.05.2022	2.42137e-05	0.00283301	3.34622e-16	9.03481e-15	[-1]	Group18	5.04202	6	[CDC42, HRAS, KRAS, NRAS, RAC1, RHOA]
KEGG:05100	Bacterial invasion of epithelial cells	KEGG_25.05.2022	1.94688e-06	0.000362119	3.34622e-16	9.03481e-15	[-1]	Group18	7.79221	6	[CDC42, RAC1, RHOA, SEPTIN11, SEPTIN8, SEPTIN9]
KEGG:05131	Shigellosis	KEGG_25.05.2022	1.99256e-10	6.95404e-08	3.34622e-16	9.03481e-15	[-1]	Group18	5.26316	13	[CDC42, H3-3A, H3-4, H3-5, H3C14, RAC1, RHOA, RPS27A, SEPTIN11, SEPTIN7, SEPTIN8, SEPTIN9, UBA52]
KEGG:04062	Chemokine signaling pathway	KEGG_25.05.2022	3.07165e-08	8.69276e-06	1.1873e-15	2.96826e-14	[-1]	Group19	5.20833	10	[CDC42, FGR, HCK, HRAS, KRAS, LYN, NRAS, RAC1, RAC3, RHOA]
KEGG:04110	Cell cycle	KEGG_25.05.2022	1.00924e-08	3.01763e-06	1.1873e-15	2.96826e-14	[-1]	Group19	7.14286	9	[CDK1, CDK2, CDK4, CDK6, SFN, YWHAB, YWHAG, YWHAH, YWHAZ]
KEGG:04114	Oocyte meiosis	KEGG_25.05.2022	2.3386e-07	5.77635e-05	1.1873e-15	2.96826e-14	[-1]	Group19	6.10687	8	[CDK1, CDK2, PPP1CA, PPP2CA, YWHAB, YWHAG, YWHAH, YWHAZ]
KEGG:04151	PI3K-Akt signaling pathway	KEGG_25.05.2022	1.08884e-12	4.0396e-10	1.1873e-15	2.96826e-14	[-1]	Group19	4.80226	17	[CDK2, CDK4, CDK6, FGFR1, FGFR2, FGFR3, FGFR4, HRAS, KRAS, NRAS, PPP2CA, RAC1, TEK, YWHAB, YWHAG, YWHAH, YWHAZ]
KEGG:04218	Cellular senescence	KEGG_25.05.2022	2.42704e-10	8.44608e-08	1.1873e-15	2.96826e-14	[-1]	Group19	7.05128	11	[CDK1, CDK2, CDK4, CDK6, HRAS, KRAS, NRAS, PPP1CA, SLC25A31, SLC25A4, SLC25A6]
KEGG:04360	Axon guidance	KEGG_25.05.2022	2.42584e-07	5.94331e-05	1.1873e-15	2.96826e-14	[-1]	Group19	4.94506	9	[CDC42, CDK5, FYN, HRAS, KRAS, NRAS, RAC1, RAC3, RHOA]
KEGG:04370	VEGF signaling pathway	KEGG_25.05.2022	3.96757e-07	9.28411e-05	1.1873e-15	2.96826e-14	[-1]	Group19	10.1695	6	[CDC42, HRAS, KRAS, NRAS, RAC1, RAC3]
KEGG:04660	T cell receptor signaling pathway	KEGG_25.05.2022	3.87351e-08	1.07296e-05	1.1873e-15	2.96826e-14	[-1]	Group19	7.69231	8	[CDC42, CDK4, FYN, HRAS, KRAS, LCK, NRAS, RHOA]
KEGG:04662	B cell receptor signaling pathway	KEGG_25.05.2022	2.82009e-06	0.000501977	1.1873e-15	2.96826e-14	[-1]	Group19	7.31707	6	[HRAS, KRAS, LYN, NRAS, RAC1, RAC3]
KEGG:04722	Neurotrophin signaling pathway	KEGG_25.05.2022	2.42137e-05	0.00283301	1.1873e-15	2.96826e-14	[-1]	Group19	5.04202	6	[CDC42, HRAS, KRAS, NRAS, RAC1, RHOA]
KEGG:04933	AGE-RAGE signaling pathway in diabetic complications	KEGG_25.05.2022	8.95325e-06	0.00128031	1.1873e-15	2.96826e-14	[-1]	Group19	6	6	[CDC42, CDK4, HRAS, KRAS, NRAS, RAC1]
KEGG:05160	Hepatitis C	KEGG_25.05.2022	2.59962e-10	9.02069e-08	1.1873e-15	2.96826e-14	[-1]	Group19	7.00637	11	[CDK2, CDK4, CDK6, HRAS, KRAS, NRAS, PPP2CA, YWHAB, YWHAG, YWHAH, YWHAZ]
KEGG:05167	Kaposi sarcoma-associated herpesvirus infection	KEGG_25.05.2022	3.38865e-08	9.48823e-06	1.1873e-15	2.96826e-14	[-1]	Group19	5.15464	10	[CDK4, CDK6, HCK, HRAS, KRAS, LYN, NRAS, RAC1, RPS27A, UBA52]
KEGG:05203	Viral carcinogenesis	KEGG_25.05.2022	5.56967e-14	2.09977e-11	1.1873e-15	2.96826e-14	[-1]	Group19	7.35294	15	[CDC42, CDK1, CDK2, CDK4, CDK6, HRAS, KRAS, LYN, NRAS, RAC1, RHOA, YWHAB, YWHAG, YWHAH, YWHAZ]
KEGG:05210	Colorectal cancer	KEGG_25.05.2022	3.72819e-06	0.000637521	1.1873e-15	2.96826e-14	[-1]	Group19	6.97674	6	[HRAS, KRAS, NRAS, RAC1, RAC3, RHOA]
KEGG:05211	Renal cell carcinoma	KEGG_25.05.2022	2.07983e-05	0.00253739	1.1873e-15	2.96826e-14	[-1]	Group19	7.24638	5	[CDC42, HRAS, KRAS, NRAS, RAC1]
KEGG:05212	Pancreatic cancer	KEGG_25.05.2022	1.80215e-06	0.000338804	1.1873e-15	2.96826e-14	[-1]	Group19	7.89474	6	[CDC42, CDK4, CDK6, KRAS, RAC1, RAC3]
KEGG:05214	Glioma	KEGG_25.05.2022	3.12195e-05	0.00343415	1.1873e-15	2.96826e-14	[-1]	Group19	6.66667	5	[CDK4, CDK6, HRAS, KRAS, NRAS]
KEGG:05218	Melanoma	KEGG_25.05.2022	1.30808e-06	0.000257691	1.1873e-15	2.96826e-14	[-1]	Group19	8.33333	6	[CDK4, CDK6, FGFR1, HRAS, KRAS, NRAS]
KEGG:05220	Chronic myeloid leukemia	KEGG_25.05.2022	3.32912e-05	0.00359544	1.1873e-15	2.96826e-14	[-1]	Group19	6.57895	5	[CDK4, CDK6, HRAS, KRAS, NRAS]
KEGG:05223	Non-small cell lung cancer	KEGG_25.05.2022	2.55991e-05	0.00296949	1.1873e-15	2.96826e-14	[-1]	Group19	6.94444	5	[CDK4, CDK6, HRAS, KRAS, NRAS]
KEGG:05224	Breast cancer	KEGG_25.05.2022	7.91325e-05	0.00688453	1.1873e-15	2.96826e-14	[-1]	Group19	4.08163	6	[CDK4, CDK6, FGFR1, HRAS, KRAS, NRAS]
KEGG:04110	Cell cycle	KEGG_25.05.2022	1.00924e-08	3.01763e-06	6.72002e-27	2.35201e-25	[-1]	Group20	7.14286	9	[CDK1, CDK2, CDK4, CDK6, SFN, YWHAB, YWHAG, YWHAH, YWHAZ]
KEGG:04115	p53 signaling pathway	KEGG_25.05.2022	2.7377e-05	0.0030936	6.72002e-27	2.35201e-25	[-1]	Group20	6.84932	5	[CDK1, CDK2, CDK4, CDK6, SFN]
KEGG:04218	Cellular senescence	KEGG_25.05.2022	2.42704e-10	8.44608e-08	6.72002e-27	2.35201e-25	[-1]	Group20	7.05128	11	[CDK1, CDK2, CDK4, CDK6, HRAS, KRAS, NRAS, PPP1CA, SLC25A31, SLC25A4, SLC25A6]
KEGG:05167	Kaposi sarcoma-associated herpesvirus infection	KEGG_25.05.2022	3.38865e-08	9.48823e-06	6.72002e-27	2.35201e-25	[-1]	Group20	5.15464	10	[CDK4, CDK6, HCK, HRAS, KRAS, LYN, NRAS, RAC1, RPS27A, UBA52]
KEGG:05212	Pancreatic cancer	KEGG_25.05.2022	1.80215e-06	0.000338804	6.72002e-27	2.35201e-25	[-1]	Group20	7.89474	6	[CDC42, CDK4, CDK6, KRAS, RAC1, RAC3]
KEGG:05214	Glioma	KEGG_25.05.2022	3.12195e-05	0.00343415	6.72002e-27	2.35201e-25	[-1]	Group20	6.66667	5	[CDK4, CDK6, HRAS, KRAS, NRAS]
KEGG:05218	Melanoma	KEGG_25.05.2022	1.30808e-06	0.000257691	6.72002e-27	2.35201e-25	[-1]	Group20	8.33333	6	[CDK4, CDK6, FGFR1, HRAS, KRAS, NRAS]
KEGG:05220	Chronic myeloid leukemia	KEGG_25.05.2022	3.32912e-05	0.00359544	6.72002e-27	2.35201e-25	[-1]	Group20	6.57895	5	[CDK4, CDK6, HRAS, KRAS, NRAS]
KEGG:05223	Non-small cell lung cancer	KEGG_25.05.2022	2.55991e-05	0.00296949	6.72002e-27	2.35201e-25	[-1]	Group20	6.94444	5	[CDK4, CDK6, HRAS, KRAS, NRAS]
KEGG:05224	Breast cancer	KEGG_25.05.2022	7.91325e-05	0.00688453	6.72002e-27	2.35201e-25	[-1]	Group20	4.08163	6	[CDK4, CDK6, FGFR1, HRAS, KRAS, NRAS]
KEGG:04014	Ras signaling pathway	KEGG_25.05.2022	1.46765e-09	4.75519e-07	6.68076e-12	1.06892e-10	[-1]	Group21	5.10638	12	[CDC42, FGFR1, FGFR2, FGFR3, FGFR4, HRAS, KRAS, NRAS, RAC1, RAC3, RHOA, TEK]
KEGG:04015	Rap1 signaling pathway	KEGG_25.05.2022	4.05597e-10	1.3912e-07	6.68076e-12	1.06892e-10	[-1]	Group21	5.71429	12	[CDC42, FGFR1, FGFR2, FGFR3, FGFR4, HRAS, KRAS, NRAS, RAC1, RAC3, RHOA, TEK]
KEGG:04110	Cell cycle	KEGG_25.05.2022	1.00924e-08	3.01763e-06	6.68076e-12	1.06892e-10	[-1]	Group21	7.14286	9	[CDK1, CDK2, CDK4, CDK6, SFN, YWHAB, YWHAG, YWHAH, YWHAZ]
KEGG:04114	Oocyte meiosis	KEGG_25.05.2022	2.3386e-07	5.77635e-05	6.68076e-12	1.06892e-10	[-1]	Group21	6.10687	8	[CDK1, CDK2, PPP1CA, PPP2CA, YWHAB, YWHAG, YWHAH, YWHAZ]
KEGG:04151	PI3K-Akt signaling pathway	KEGG_25.05.2022	1.08884e-12	4.0396e-10	6.68076e-12	1.06892e-10	[-1]	Group21	4.80226	17	[CDK2, CDK4, CDK6, FGFR1, FGFR2, FGFR3, FGFR4, HRAS, KRAS, NRAS, PPP2CA, RAC1, TEK, YWHAB, YWHAG, YWHAH, YWHAZ]
KEGG:04550	Signaling pathways regulating pluripotency of stem cells	KEGG_25.05.2022	6.00901e-06	0.000919379	6.68076e-12	1.06892e-10	[-1]	Group21	4.8951	7	[FGFR1, FGFR2, FGFR3, FGFR4, HRAS, KRAS, NRAS]
KEGG:04810	Regulation of actin cytoskeleton	KEGG_25.05.2022	6.22983e-10	2.10568e-07	6.68076e-12	1.06892e-10	[-1]	Group21	5.50459	12	[CDC42, FGFR1, FGFR2, FGFR3, FGFR4, HRAS, KRAS, NRAS, PPP1CA, RAC1, RAC3, RHOA]
KEGG:05160	Hepatitis C	KEGG_25.05.2022	2.59962e-10	9.02069e-08	6.68076e-12	1.06892e-10	[-1]	Group21	7.00637	11	[CDK2, CDK4, CDK6, HRAS, KRAS, NRAS, PPP2CA, YWHAB, YWHAG, YWHAH, YWHAZ]
KEGG:05203	Viral carcinogenesis	KEGG_25.05.2022	5.56967e-14	2.09977e-11	6.68076e-12	1.06892e-10	[-1]	Group21	7.35294	15	[CDC42, CDK1, CDK2, CDK4, CDK6, HRAS, KRAS, LYN, NRAS, RAC1, RHOA, YWHAB, YWHAG, YWHAH, YWHAZ]
KEGG:05214	Glioma	KEGG_25.05.2022	3.12195e-05	0.00343415	6.68076e-12	1.06892e-10	[-1]	Group21	6.66667	5	[CDK4, CDK6, HRAS, KRAS, NRAS]
KEGG:05215	Prostate cancer	KEGG_25.05.2022	7.50875e-06	0.00110379	6.68076e-12	1.06892e-10	[-1]	Group21	6.18557	6	[CDK2, FGFR1, FGFR2, HRAS, KRAS, NRAS]
KEGG:05218	Melanoma	KEGG_25.05.2022	1.30808e-06	0.000257691	6.68076e-12	1.06892e-10	[-1]	Group21	8.33333	6	[CDK4, CDK6, FGFR1, HRAS, KRAS, NRAS]
KEGG:05219	Bladder cancer	KEGG_25.05.2022	1.54301e-06	0.000294715	6.68076e-12	1.06892e-10	[-1]	Group21	12.1951	5	[CDK4, FGFR3, HRAS, KRAS, NRAS]
KEGG:05220	Chronic myeloid leukemia	KEGG_25.05.2022	3.32912e-05	0.00359544	6.68076e-12	1.06892e-10	[-1]	Group21	6.57895	5	[CDK4, CDK6, HRAS, KRAS, NRAS]
KEGG:05223	Non-small cell lung cancer	KEGG_25.05.2022	2.55991e-05	0.00296949	6.68076e-12	1.06892e-10	[-1]	Group21	6.94444	5	[CDK4, CDK6, HRAS, KRAS, NRAS]
KEGG:05224	Breast cancer	KEGG_25.05.2022	7.91325e-05	0.00688453	6.68076e-12	1.06892e-10	[-1]	Group21	4.08163	6	[CDK4, CDK6, FGFR1, HRAS, KRAS, NRAS]
KEGG:05230	Central carbon metabolism in cancer	KEGG_25.05.2022	1.10629e-06	0.000224577	6.68076e-12	1.06892e-10	[-1]	Group21	8.57143	6	[FGFR1, FGFR2, FGFR3, HRAS, KRAS, NRAS]
KEGG:04217	Necroptosis	KEGG_25.05.2022	3.35496e-14	1.26818e-11	1.84981e-17	5.54942e-16	[-1]	Group22	8.80503	14	[H2AC12, H2AC13, H2AC15, H2AC21, H2AC6, H2AC7, H2AJ, H2AW, H2AX, PYGB, PYGM, SLC25A31, SLC25A4, SLC25A6]
KEGG:04613	Neutrophil extracellular trap formation	KEGG_25.05.2022	3.65516e-17	1.41089e-14	1.84981e-17	5.54942e-16	[-1]	Group22	8.94737	17	[H2AC12, H2AC13, H2AC15, H2AC21, H2AC6, H2AC7, H2AJ, H2AW, H2AX, H3-3A, H3-4, H3-5, H3C14, RAC1, SLC25A31, SLC25A4, SLC25A6]
KEGG:05034	Alcoholism	KEGG_25.05.2022	2.78641e-17	1.07834e-14	1.84981e-17	5.54942e-16	[-1]	Group22	9.09091	17	[H2AC12, H2AC13, H2AC15, H2AC21, H2AC6, H2AC7, H2AJ, H2AW, H2AX, H3-3A, H3-4, H3-5, H3C14, HRAS, KRAS, NRAS, PPP1CA]
KEGG:05322	Systemic lupus erythematosus	KEGG_25.05.2022	1.00293e-13	3.771e-11	1.84981e-17	5.54942e-16	[-1]	Group22	9.55882	13	[H2AC12, H2AC13, H2AC15, H2AC21, H2AC6, H2AC7, H2AJ, H2AW, H2AX, H3-3A, H3-4, H3-5, H3C14]
KEGG:04014	Ras signaling pathway	KEGG_25.05.2022	1.46765e-09	4.75519e-07	1.36226e-16	3.81432e-15	[-1]	Group24	5.10638	12	[CDC42, FGFR1, FGFR2, FGFR3, FGFR4, HRAS, KRAS, NRAS, RAC1, RAC3, RHOA, TEK]
KEGG:04015	Rap1 signaling pathway	KEGG_25.05.2022	4.05597e-10	1.3912e-07	1.36226e-16	3.81432e-15	[-1]	Group24	5.71429	12	[CDC42, FGFR1, FGFR2, FGFR3, FGFR4, HRAS, KRAS, NRAS, RAC1, RAC3, RHOA, TEK]
KEGG:04151	PI3K-Akt signaling pathway	KEGG_25.05.2022	1.08884e-12	4.0396e-10	1.36226e-16	3.81432e-15	[-1]	Group24	4.80226	17	[CDK2, CDK4, CDK6, FGFR1, FGFR2, FGFR3, FGFR4, HRAS, KRAS, NRAS, PPP2CA, RAC1, TEK, YWHAB, YWHAG, YWHAH, YWHAZ]
KEGG:04550	Signaling pathways regulating pluripotency of stem cells	KEGG_25.05.2022	6.00901e-06	0.000919379	1.36226e-16	3.81432e-15	[-1]	Group24	4.8951	7	[FGFR1, FGFR2, FGFR3, FGFR4, HRAS, KRAS, NRAS]
KEGG:04810	Regulation of actin cytoskeleton	KEGG_25.05.2022	6.22983e-10	2.10568e-07	1.36226e-16	3.81432e-15	[-1]	Group24	5.50459	12	[CDC42, FGFR1, FGFR2, FGFR3, FGFR4, HRAS, KRAS, NRAS, PPP1CA, RAC1, RAC3, RHOA]
KEGG:05230	Central carbon metabolism in cancer	KEGG_25.05.2022	1.10629e-06	0.000224577	1.36226e-16	3.81432e-15	[-1]	Group24	8.57143	6	[FGFR1, FGFR2, FGFR3, HRAS, KRAS, NRAS]
KEGG:04062	Chemokine signaling pathway	KEGG_25.05.2022	3.07165e-08	8.69276e-06	4.27999e-14	8.55999e-13	[-1]	Group25	5.20833	10	[CDC42, FGR, HCK, HRAS, KRAS, LYN, NRAS, RAC1, RAC3, RHOA]
KEGG:04662	B cell receptor signaling pathway	KEGG_25.05.2022	2.82009e-06	0.000501977	4.27999e-14	8.55999e-13	[-1]	Group25	7.31707	6	[HRAS, KRAS, LYN, NRAS, RAC1, RAC3]
KEGG:04666	Fc gamma R-mediated phagocytosis	KEGG_25.05.2022	0.00125454	0.032618	4.27999e-14	8.55999e-13	[-1]	Group25	4.12371	4	[CDC42, HCK, LYN, RAC1]
KEGG:04730	Long-term depression	KEGG_25.05.2022	1.04596e-05	0.00145388	4.27999e-14	8.55999e-13	[-1]	Group25	8.33333	5	[HRAS, KRAS, LYN, NRAS, PPP2CA]
KEGG:05167	Kaposi sarcoma-associated herpesvirus infection	KEGG_25.05.2022	3.38865e-08	9.48823e-06	4.27999e-14	8.55999e-13	[-1]	Group25	5.15464	10	[CDK4, CDK6, HCK, HRAS, KRAS, LYN, NRAS, RAC1, RPS27A, UBA52]
KEGG:04014	Ras signaling pathway	KEGG_25.05.2022	1.46765e-09	4.75519e-07	3.09058e-14	6.49021e-13	[-1]	Group26	5.10638	12	[CDC42, FGFR1, FGFR2, FGFR3, FGFR4, HRAS, KRAS, NRAS, RAC1, RAC3, RHOA, TEK]
KEGG:04015	Rap1 signaling pathway	KEGG_25.05.2022	4.05597e-10	1.3912e-07	3.09058e-14	6.49021e-13	[-1]	Group26	5.71429	12	[CDC42, FGFR1, FGFR2, FGFR3, FGFR4, HRAS, KRAS, NRAS, RAC1, RAC3, RHOA, TEK]
KEGG:04071	Sphingolipid signaling pathway	KEGG_25.05.2022	1.11163e-07	2.90135e-05	3.09058e-14	6.49021e-13	[-1]	Group26	6.72269	8	[FYN, HRAS, KRAS, NRAS, PPP2CA, RAC1, RAC3, RHOA]
KEGG:04137	Mitophagy	KEGG_25.05.2022	2.55991e-05	0.00296949	3.09058e-14	6.49021e-13	[-1]	Group26	6.94444	5	[HRAS, KRAS, NRAS, RPS27A, UBA52]
KEGG:04151	PI3K-Akt signaling pathway	KEGG_25.05.2022	1.08884e-12	4.0396e-10	3.09058e-14	6.49021e-13	[-1]	Group26	4.80226	17	[CDK2, CDK4, CDK6, FGFR1, FGFR2, FGFR3, FGFR4, HRAS, KRAS, NRAS, PPP2CA, RAC1, TEK, YWHAB, YWHAG, YWHAH, YWHAZ]
KEGG:04550	Signaling pathways regulating pluripotency of stem cells	KEGG_25.05.2022	6.00901e-06	0.000919379	3.09058e-14	6.49021e-13	[-1]	Group26	4.8951	7	[FGFR1, FGFR2, FGFR3, FGFR4, HRAS, KRAS, NRAS]
KEGG:04810	Regulation of actin cytoskeleton	KEGG_25.05.2022	6.22983e-10	2.10568e-07	3.09058e-14	6.49021e-13	[-1]	Group26	5.50459	12	[CDC42, FGFR1, FGFR2, FGFR3, FGFR4, HRAS, KRAS, NRAS, PPP1CA, RAC1, RAC3, RHOA]
KEGG:05211	Renal cell carcinoma	KEGG_25.05.2022	2.07983e-05	0.00253739	3.09058e-14	6.49021e-13	[-1]	Group26	7.24638	5	[CDC42, HRAS, KRAS, NRAS, RAC1]
KEGG:05230	Central carbon metabolism in cancer	KEGG_25.05.2022	1.10629e-06	0.000224577	3.09058e-14	6.49021e-13	[-1]	Group26	8.57143	6	[FGFR1, FGFR2, FGFR3, HRAS, KRAS, NRAS]
KEGG:04110	Cell cycle	KEGG_25.05.2022	1.00924e-08	3.01763e-06	1.17968e-17	3.65701e-16	[-1]	Group27	7.14286	9	[CDK1, CDK2, CDK4, CDK6, SFN, YWHAB, YWHAG, YWHAH, YWHAZ]
KEGG:04114	Oocyte meiosis	KEGG_25.05.2022	2.3386e-07	5.77635e-05	1.17968e-17	3.65701e-16	[-1]	Group27	6.10687	8	[CDK1, CDK2, PPP1CA, PPP2CA, YWHAB, YWHAG, YWHAH, YWHAZ]
KEGG:04115	p53 signaling pathway	KEGG_25.05.2022	2.7377e-05	0.0030936	1.17968e-17	3.65701e-16	[-1]	Group27	6.84932	5	[CDK1, CDK2, CDK4, CDK6, SFN]
KEGG:04151	PI3K-Akt signaling pathway	KEGG_25.05.2022	1.08884e-12	4.0396e-10	1.17968e-17	3.65701e-16	[-1]	Group27	4.80226	17	[CDK2, CDK4, CDK6, FGFR1, FGFR2, FGFR3, FGFR4, HRAS, KRAS, NRAS, PPP2CA, RAC1, TEK, YWHAB, YWHAG, YWHAH, YWHAZ]
KEGG:04390	Hippo signaling pathway	KEGG_25.05.2022	1.10866e-05	0.00151886	1.17968e-17	3.65701e-16	[-1]	Group27	4.4586	7	[CRB2, PPP1CA, PPP2CA, YWHAB, YWHAG, YWHAH, YWHAZ]
KEGG:05160	Hepatitis C	KEGG_25.05.2022	2.59962e-10	9.02069e-08	1.17968e-17	3.65701e-16	[-1]	Group27	7.00637	11	[CDK2, CDK4, CDK6, HRAS, KRAS, NRAS, PPP2CA, YWHAB, YWHAG, YWHAH, YWHAZ]
KEGG:05203	Viral carcinogenesis	KEGG_25.05.2022	5.56967e-14	2.09977e-11	1.17968e-17	3.65701e-16	[-1]	Group27	7.35294	15	[CDC42, CDK1, CDK2, CDK4, CDK6, HRAS, KRAS, LYN, NRAS, RAC1, RHOA, YWHAB, YWHAG, YWHAH, YWHAZ]
KEGG:04014	Ras signaling pathway	KEGG_25.05.2022	1.46765e-09	4.75519e-07	1.63598e-13	3.10836e-12	[-1]	Group28	5.10638	12	[CDC42, FGFR1, FGFR2, FGFR3, FGFR4, HRAS, KRAS, NRAS, RAC1, RAC3, RHOA, TEK]
KEGG:04015	Rap1 signaling pathway	KEGG_25.05.2022	4.05597e-10	1.3912e-07	1.63598e-13	3.10836e-12	[-1]	Group28	5.71429	12	[CDC42, FGFR1, FGFR2, FGFR3, FGFR4, HRAS, KRAS, NRAS, RAC1, RAC3, RHOA, TEK]
KEGG:04062	Chemokine signaling pathway	KEGG_25.05.2022	3.07165e-08	8.69276e-06	1.63598e-13	3.10836e-12	[-1]	Group28	5.20833	10	[CDC42, FGR, HCK, HRAS, KRAS, LYN, NRAS, RAC1, RAC3, RHOA]
KEGG:04071	Sphingolipid signaling pathway	KEGG_25.05.2022	1.11163e-07	2.90135e-05	1.63598e-13	3.10836e-12	[-1]	Group28	6.72269	8	[FYN, HRAS, KRAS, NRAS, PPP2CA, RAC1, RAC3, RHOA]
KEGG:04151	PI3K-Akt signaling pathway	KEGG_25.05.2022	1.08884e-12	4.0396e-10	1.63598e-13	3.10836e-12	[-1]	Group28	4.80226	17	[CDK2, CDK4, CDK6, FGFR1, FGFR2, FGFR3, FGFR4, HRAS, KRAS, NRAS, PPP2CA, RAC1, TEK, YWHAB, YWHAG, YWHAH, YWHAZ]
KEGG:04360	Axon guidance	KEGG_25.05.2022	2.42584e-07	5.94331e-05	1.63598e-13	3.10836e-12	[-1]	Group28	4.94506	9	[CDC42, CDK5, FYN, HRAS, KRAS, NRAS, RAC1, RAC3, RHOA]
KEGG:04370	VEGF signaling pathway	KEGG_25.05.2022	3.96757e-07	9.28411e-05	1.63598e-13	3.10836e-12	[-1]	Group28	10.1695	6	[CDC42, HRAS, KRAS, NRAS, RAC1, RAC3]
KEGG:04520	Adherens junction	KEGG_25.05.2022	5.0704e-08	1.38422e-05	1.63598e-13	3.10836e-12	[-1]	Group28	9.85915	7	[CDC42, FGFR1, FYN, RAC1, RAC3, RHOA, YES1]
KEGG:04550	Signaling pathways regulating pluripotency of stem cells	KEGG_25.05.2022	6.00901e-06	0.000919379	1.63598e-13	3.10836e-12	[-1]	Group28	4.8951	7	[FGFR1, FGFR2, FGFR3, FGFR4, HRAS, KRAS, NRAS]
KEGG:04650	Natural killer cell mediated cytotoxicity	KEGG_25.05.2022	3.36303e-06	0.000585167	1.63598e-13	3.10836e-12	[-1]	Group28	5.34351	7	[FYN, HRAS, KRAS, LCK, NRAS, RAC1, RAC3]
KEGG:04660	T cell receptor signaling pathway	KEGG_25.05.2022	3.87351e-08	1.07296e-05	1.63598e-13	3.10836e-12	[-1]	Group28	7.69231	8	[CDC42, CDK4, FYN, HRAS, KRAS, LCK, NRAS, RHOA]
KEGG:04662	B cell receptor signaling pathway	KEGG_25.05.2022	2.82009e-06	0.000501977	1.63598e-13	3.10836e-12	[-1]	Group28	7.31707	6	[HRAS, KRAS, LYN, NRAS, RAC1, RAC3]
KEGG:04664	Fc epsilon RI signaling pathway	KEGG_25.05.2022	3.7399e-08	1.03969e-05	1.63598e-13	3.10836e-12	[-1]	Group28	10.2941	7	[FYN, HRAS, KRAS, LYN, NRAS, RAC1, RAC3]
KEGG:04720	Long-term potentiation	KEGG_25.05.2022	0.000309881	0.0176632	1.63598e-13	3.10836e-12	[-1]	Group28	5.97015	4	[HRAS, KRAS, NRAS, PPP1CA]
KEGG:04722	Neurotrophin signaling pathway	KEGG_25.05.2022	2.42137e-05	0.00283301	1.63598e-13	3.10836e-12	[-1]	Group28	5.04202	6	[CDC42, HRAS, KRAS, NRAS, RAC1, RHOA]
KEGG:04810	Regulation of actin cytoskeleton	KEGG_25.05.2022	6.22983e-10	2.10568e-07	1.63598e-13	3.10836e-12	[-1]	Group28	5.50459	12	[CDC42, FGFR1, FGFR2, FGFR3, FGFR4, HRAS, KRAS, NRAS, PPP1CA, RAC1, RAC3, RHOA]
KEGG:04912	GnRH signaling pathway	KEGG_25.05.2022	0.0010728	0.032184	1.63598e-13	3.10836e-12	[-1]	Group28	4.30108	4	[CDC42, HRAS, KRAS, NRAS]
KEGG:04933	AGE-RAGE signaling pathway in diabetic complications	KEGG_25.05.2022	8.95325e-06	0.00128031	1.63598e-13	3.10836e-12	[-1]	Group28	6	6	[CDC42, CDK4, HRAS, KRAS, NRAS, RAC1]
KEGG:05210	Colorectal cancer	KEGG_25.05.2022	3.72819e-06	0.000637521	1.63598e-13	3.10836e-12	[-1]	Group28	6.97674	6	[HRAS, KRAS, NRAS, RAC1, RAC3, RHOA]
KEGG:05211	Renal cell carcinoma	KEGG_25.05.2022	2.07983e-05	0.00253739	1.63598e-13	3.10836e-12	[-1]	Group28	7.24638	5	[CDC42, HRAS, KRAS, NRAS, RAC1]
KEGG:05215	Prostate cancer	KEGG_25.05.2022	7.50875e-06	0.00110379	1.63598e-13	3.10836e-12	[-1]	Group28	6.18557	6	[CDK2, FGFR1, FGFR2, HRAS, KRAS, NRAS]
KEGG:05219	Bladder cancer	KEGG_25.05.2022	1.54301e-06	0.000294715	1.63598e-13	3.10836e-12	[-1]	Group28	12.1951	5	[CDK4, FGFR3, HRAS, KRAS, NRAS]
KEGG:05230	Central carbon metabolism in cancer	KEGG_25.05.2022	1.10629e-06	0.000224577	1.63598e-13	3.10836e-12	[-1]	Group28	8.57143	6	[FGFR1, FGFR2, FGFR3, HRAS, KRAS, NRAS]
KEGG:05231	Choline metabolism in cancer	KEGG_25.05.2022	0.000112555	0.00889185	1.63598e-13	3.10836e-12	[-1]	Group28	5.10204	5	[HRAS, KRAS, NRAS, RAC1, RAC3]
KEGG:04110	Cell cycle	KEGG_25.05.2022	1.00924e-08	3.01763e-06	2.78916e-15	6.41507e-14	[-1]	Group29	7.14286	9	[CDK1, CDK2, CDK4, CDK6, SFN, YWHAB, YWHAG, YWHAH, YWHAZ]
KEGG:04114	Oocyte meiosis	KEGG_25.05.2022	2.3386e-07	5.77635e-05	2.78916e-15	6.41507e-14	[-1]	Group29	6.10687	8	[CDK1, CDK2, PPP1CA, PPP2CA, YWHAB, YWHAG, YWHAH, YWHAZ]
KEGG:04151	PI3K-Akt signaling pathway	KEGG_25.05.2022	1.08884e-12	4.0396e-10	2.78916e-15	6.41507e-14	[-1]	Group29	4.80226	17	[CDK2, CDK4, CDK6, FGFR1, FGFR2, FGFR3, FGFR4, HRAS, KRAS, NRAS, PPP2CA, RAC1, TEK, YWHAB, YWHAG, YWHAH, YWHAZ]
KEGG:04218	Cellular senescence	KEGG_25.05.2022	2.42704e-10	8.44608e-08	2.78916e-15	6.41507e-14	[-1]	Group29	7.05128	11	[CDK1, CDK2, CDK4, CDK6, HRAS, KRAS, NRAS, PPP1CA, SLC25A31, SLC25A4, SLC25A6]
KEGG:04390	Hippo signaling pathway	KEGG_25.05.2022	1.10866e-05	0.00151886	2.78916e-15	6.41507e-14	[-1]	Group29	4.4586	7	[CRB2, PPP1CA, PPP2CA, YWHAB, YWHAG, YWHAH, YWHAZ]
KEGG:04730	Long-term depression	KEGG_25.05.2022	1.04596e-05	0.00145388	2.78916e-15	6.41507e-14	[-1]	Group29	8.33333	5	[HRAS, KRAS, LYN, NRAS, PPP2CA]
KEGG:04933	AGE-RAGE signaling pathway in diabetic complications	KEGG_25.05.2022	8.95325e-06	0.00128031	2.78916e-15	6.41507e-14	[-1]	Group29	6	6	[CDC42, CDK4, HRAS, KRAS, NRAS, RAC1]
KEGG:05160	Hepatitis C	KEGG_25.05.2022	2.59962e-10	9.02069e-08	2.78916e-15	6.41507e-14	[-1]	Group29	7.00637	11	[CDK2, CDK4, CDK6, HRAS, KRAS, NRAS, PPP2CA, YWHAB, YWHAG, YWHAH, YWHAZ]
KEGG:05166	Human T-cell leukemia virus 1 infection	KEGG_25.05.2022	1.28427e-06	0.000254286	2.78916e-15	6.41507e-14	[-1]	Group29	4.05405	9	[CDK2, CDK4, HRAS, KRAS, LCK, NRAS, SLC25A31, SLC25A4, SLC25A6]
KEGG:05167	Kaposi sarcoma-associated herpesvirus infection	KEGG_25.05.2022	3.38865e-08	9.48823e-06	2.78916e-15	6.41507e-14	[-1]	Group29	5.15464	10	[CDK4, CDK6, HCK, HRAS, KRAS, LYN, NRAS, RAC1, RPS27A, UBA52]
KEGG:05203	Viral carcinogenesis	KEGG_25.05.2022	5.56967e-14	2.09977e-11	2.78916e-15	6.41507e-14	[-1]	Group29	7.35294	15	[CDC42, CDK1, CDK2, CDK4, CDK6, HRAS, KRAS, LYN, NRAS, RAC1, RHOA, YWHAB, YWHAG, YWHAH, YWHAZ]
KEGG:05214	Glioma	KEGG_25.05.2022	3.12195e-05	0.00343415	2.78916e-15	6.41507e-14	[-1]	Group29	6.66667	5	[CDK4, CDK6, HRAS, KRAS, NRAS]
KEGG:05215	Prostate cancer	KEGG_25.05.2022	7.50875e-06	0.00110379	2.78916e-15	6.41507e-14	[-1]	Group29	6.18557	6	[CDK2, FGFR1, FGFR2, HRAS, KRAS, NRAS]
KEGG:05218	Melanoma	KEGG_25.05.2022	1.30808e-06	0.000257691	2.78916e-15	6.41507e-14	[-1]	Group29	8.33333	6	[CDK4, CDK6, FGFR1, HRAS, KRAS, NRAS]
KEGG:05219	Bladder cancer	KEGG_25.05.2022	1.54301e-06	0.000294715	2.78916e-15	6.41507e-14	[-1]	Group29	12.1951	5	[CDK4, FGFR3, HRAS, KRAS, NRAS]
KEGG:05220	Chronic myeloid leukemia	KEGG_25.05.2022	3.32912e-05	0.00359544	2.78916e-15	6.41507e-14	[-1]	Group29	6.57895	5	[CDK4, CDK6, HRAS, KRAS, NRAS]
KEGG:05223	Non-small cell lung cancer	KEGG_25.05.2022	2.55991e-05	0.00296949	2.78916e-15	6.41507e-14	[-1]	Group29	6.94444	5	[CDK4, CDK6, HRAS, KRAS, NRAS]
KEGG:05224	Breast cancer	KEGG_25.05.2022	7.91325e-05	0.00688453	2.78916e-15	6.41507e-14	[-1]	Group29	4.08163	6	[CDK4, CDK6, FGFR1, HRAS, KRAS, NRAS]
KEGG:04014	Ras signaling pathway	KEGG_25.05.2022	1.46765e-09	4.75519e-07	6.50036e-16	1.69009e-14	[-1]	Group30	5.10638	12	[CDC42, FGFR1, FGFR2, FGFR3, FGFR4, HRAS, KRAS, NRAS, RAC1, RAC3, RHOA, TEK]
KEGG:04015	Rap1 signaling pathway	KEGG_25.05.2022	4.05597e-10	1.3912e-07	6.50036e-16	1.69009e-14	[-1]	Group30	5.71429	12	[CDC42, FGFR1, FGFR2, FGFR3, FGFR4, HRAS, KRAS, NRAS, RAC1, RAC3, RHOA, TEK]
KEGG:04062	Chemokine signaling pathway	KEGG_25.05.2022	3.07165e-08	8.69276e-06	6.50036e-16	1.69009e-14	[-1]	Group30	5.20833	10	[CDC42, FGR, HCK, HRAS, KRAS, LYN, NRAS, RAC1, RAC3, RHOA]
KEGG:04071	Sphingolipid signaling pathway	KEGG_25.05.2022	1.11163e-07	2.90135e-05	6.50036e-16	1.69009e-14	[-1]	Group30	6.72269	8	[FYN, HRAS, KRAS, NRAS, PPP2CA, RAC1, RAC3, RHOA]
KEGG:04360	Axon guidance	KEGG_25.05.2022	2.42584e-07	5.94331e-05	6.50036e-16	1.69009e-14	[-1]	Group30	4.94506	9	[CDC42, CDK5, FYN, HRAS, KRAS, NRAS, RAC1, RAC3, RHOA]
KEGG:04370	VEGF signaling pathway	KEGG_25.05.2022	3.96757e-07	9.28411e-05	6.50036e-16	1.69009e-14	[-1]	Group30	10.1695	6	[CDC42, HRAS, KRAS, NRAS, RAC1, RAC3]
KEGG:04520	Adherens junction	KEGG_25.05.2022	5.0704e-08	1.38422e-05	6.50036e-16	1.69009e-14	[-1]	Group30	9.85915	7	[CDC42, FGFR1, FYN, RAC1, RAC3, RHOA, YES1]
KEGG:04530	Tight junction	KEGG_25.05.2022	1.6234e-06	0.000308446	6.50036e-16	1.69009e-14	[-1]	Group30	4.73373	8	[CDC42, CDK4, PPP2CA, RAC1, RHOA, TUBA3C, TUBA3D, TUBA3E]
KEGG:04650	Natural killer cell mediated cytotoxicity	KEGG_25.05.2022	3.36303e-06	0.000585167	6.50036e-16	1.69009e-14	[-1]	Group30	5.34351	7	[FYN, HRAS, KRAS, LCK, NRAS, RAC1, RAC3]
KEGG:04662	B cell receptor signaling pathway	KEGG_25.05.2022	2.82009e-06	0.000501977	6.50036e-16	1.69009e-14	[-1]	Group30	7.31707	6	[HRAS, KRAS, LYN, NRAS, RAC1, RAC3]
KEGG:04664	Fc epsilon RI signaling pathway	KEGG_25.05.2022	3.7399e-08	1.03969e-05	6.50036e-16	1.69009e-14	[-1]	Group30	10.2941	7	[FYN, HRAS, KRAS, LYN, NRAS, RAC1, RAC3]
KEGG:04666	Fc gamma R-mediated phagocytosis	KEGG_25.05.2022	0.00125454	0.032618	6.50036e-16	1.69009e-14	[-1]	Group30	4.12371	4	[CDC42, HCK, LYN, RAC1]
KEGG:04722	Neurotrophin signaling pathway	KEGG_25.05.2022	2.42137e-05	0.00283301	6.50036e-16	1.69009e-14	[-1]	Group30	5.04202	6	[CDC42, HRAS, KRAS, NRAS, RAC1, RHOA]
KEGG:04810	Regulation of actin cytoskeleton	KEGG_25.05.2022	6.22983e-10	2.10568e-07	6.50036e-16	1.69009e-14	[-1]	Group30	5.50459	12	[CDC42, FGFR1, FGFR2, FGFR3, FGFR4, HRAS, KRAS, NRAS, PPP1CA, RAC1, RAC3, RHOA]
KEGG:04933	AGE-RAGE signaling pathway in diabetic complications	KEGG_25.05.2022	8.95325e-06	0.00128031	6.50036e-16	1.69009e-14	[-1]	Group30	6	6	[CDC42, CDK4, HRAS, KRAS, NRAS, RAC1]
KEGG:05100	Bacterial invasion of epithelial cells	KEGG_25.05.2022	1.94688e-06	0.000362119	6.50036e-16	1.69009e-14	[-1]	Group30	7.79221	6	[CDC42, RAC1, RHOA, SEPTIN11, SEPTIN8, SEPTIN9]
KEGG:05120	Epithelial cell signaling in Helicobacter pylori infection	KEGG_25.05.2022	0.00036662	0.0194309	6.50036e-16	1.69009e-14	[-1]	Group30	5.71429	4	[ATP6V1B2, CDC42, LYN, RAC1]
KEGG:05167	Kaposi sarcoma-associated herpesvirus infection	KEGG_25.05.2022	3.38865e-08	9.48823e-06	6.50036e-16	1.69009e-14	[-1]	Group30	5.15464	10	[CDK4, CDK6, HCK, HRAS, KRAS, LYN, NRAS, RAC1, RPS27A, UBA52]
KEGG:05203	Viral carcinogenesis	KEGG_25.05.2022	5.56967e-14	2.09977e-11	6.50036e-16	1.69009e-14	[-1]	Group30	7.35294	15	[CDC42, CDK1, CDK2, CDK4, CDK6, HRAS, KRAS, LYN, NRAS, RAC1, RHOA, YWHAB, YWHAG, YWHAH, YWHAZ]
KEGG:05210	Colorectal cancer	KEGG_25.05.2022	3.72819e-06	0.000637521	6.50036e-16	1.69009e-14	[-1]	Group30	6.97674	6	[HRAS, KRAS, NRAS, RAC1, RAC3, RHOA]
KEGG:05211	Renal cell carcinoma	KEGG_25.05.2022	2.07983e-05	0.00253739	6.50036e-16	1.69009e-14	[-1]	Group30	7.24638	5	[CDC42, HRAS, KRAS, NRAS, RAC1]
KEGG:05212	Pancreatic cancer	KEGG_25.05.2022	1.80215e-06	0.000338804	6.50036e-16	1.69009e-14	[-1]	Group30	7.89474	6	[CDC42, CDK4, CDK6, KRAS, RAC1, RAC3]
KEGG:05214	Glioma	KEGG_25.05.2022	3.12195e-05	0.00343415	6.50036e-16	1.69009e-14	[-1]	Group30	6.66667	5	[CDK4, CDK6, HRAS, KRAS, NRAS]
KEGG:05218	Melanoma	KEGG_25.05.2022	1.30808e-06	0.000257691	6.50036e-16	1.69009e-14	[-1]	Group30	8.33333	6	[CDK4, CDK6, FGFR1, HRAS, KRAS, NRAS]
KEGG:05220	Chronic myeloid leukemia	KEGG_25.05.2022	3.32912e-05	0.00359544	6.50036e-16	1.69009e-14	[-1]	Group30	6.57895	5	[CDK4, CDK6, HRAS, KRAS, NRAS]
KEGG:05223	Non-small cell lung cancer	KEGG_25.05.2022	2.55991e-05	0.00296949	6.50036e-16	1.69009e-14	[-1]	Group30	6.94444	5	[CDK4, CDK6, HRAS, KRAS, NRAS]
KEGG:05224	Breast cancer	KEGG_25.05.2022	7.91325e-05	0.00688453	6.50036e-16	1.69009e-14	[-1]	Group30	4.08163	6	[CDK4, CDK6, FGFR1, HRAS, KRAS, NRAS]
KEGG:05231	Choline metabolism in cancer	KEGG_25.05.2022	0.000112555	0.00889185	6.50036e-16	1.69009e-14	[-1]	Group30	5.10204	5	[HRAS, KRAS, NRAS, RAC1, RAC3]
KEGG:05416	Viral myocarditis	KEGG_25.05.2022	0.00305802	0.0336383	6.50036e-16	1.69009e-14	[-1]	Group30	5	3	[FYN, RAC1, RAC3]
KEGG:04014	Ras signaling pathway	KEGG_25.05.2022	1.46765e-09	4.75519e-07	1.37512e-14	3.02525e-13	[-1]	Group31	5.10638	12	[CDC42, FGFR1, FGFR2, FGFR3, FGFR4, HRAS, KRAS, NRAS, RAC1, RAC3, RHOA, TEK]
KEGG:04015	Rap1 signaling pathway	KEGG_25.05.2022	4.05597e-10	1.3912e-07	1.37512e-14	3.02525e-13	[-1]	Group31	5.71429	12	[CDC42, FGFR1, FGFR2, FGFR3, FGFR4, HRAS, KRAS, NRAS, RAC1, RAC3, RHOA, TEK]
KEGG:04071	Sphingolipid signaling pathway	KEGG_25.05.2022	1.11163e-07	2.90135e-05	1.37512e-14	3.02525e-13	[-1]	Group31	6.72269	8	[FYN, HRAS, KRAS, NRAS, PPP2CA, RAC1, RAC3, RHOA]
KEGG:04137	Mitophagy	KEGG_25.05.2022	2.55991e-05	0.00296949	1.37512e-14	3.02525e-13	[-1]	Group31	6.94444	5	[HRAS, KRAS, NRAS, RPS27A, UBA52]
KEGG:04151	PI3K-Akt signaling pathway	KEGG_25.05.2022	1.08884e-12	4.0396e-10	1.37512e-14	3.02525e-13	[-1]	Group31	4.80226	17	[CDK2, CDK4, CDK6, FGFR1, FGFR2, FGFR3, FGFR4, HRAS, KRAS, NRAS, PPP2CA, RAC1, TEK, YWHAB, YWHAG, YWHAH, YWHAZ]
KEGG:04550	Signaling pathways regulating pluripotency of stem cells	KEGG_25.05.2022	6.00901e-06	0.000919379	1.37512e-14	3.02525e-13	[-1]	Group31	4.8951	7	[FGFR1, FGFR2, FGFR3, FGFR4, HRAS, KRAS, NRAS]
KEGG:04810	Regulation of actin cytoskeleton	KEGG_25.05.2022	6.22983e-10	2.10568e-07	1.37512e-14	3.02525e-13	[-1]	Group31	5.50459	12	[CDC42, FGFR1, FGFR2, FGFR3, FGFR4, HRAS, KRAS, NRAS, PPP1CA, RAC1, RAC3, RHOA]
KEGG:05215	Prostate cancer	KEGG_25.05.2022	7.50875e-06	0.00110379	1.37512e-14	3.02525e-13	[-1]	Group31	6.18557	6	[CDK2, FGFR1, FGFR2, HRAS, KRAS, NRAS]
KEGG:05230	Central carbon metabolism in cancer	KEGG_25.05.2022	1.10629e-06	0.000224577	1.37512e-14	3.02525e-13	[-1]	Group31	8.57143	6	[FGFR1, FGFR2, FGFR3, HRAS, KRAS, NRAS]
KEGG:04062	Chemokine signaling pathway	KEGG_25.05.2022	3.07165e-08	8.69276e-06	1.35092e-15	3.2422e-14	[-1]	Group32	5.20833	10	[CDC42, FGR, HCK, HRAS, KRAS, LYN, NRAS, RAC1, RAC3, RHOA]
KEGG:04071	Sphingolipid signaling pathway	KEGG_25.05.2022	1.11163e-07	2.90135e-05	1.35092e-15	3.2422e-14	[-1]	Group32	6.72269	8	[FYN, HRAS, KRAS, NRAS, PPP2CA, RAC1, RAC3, RHOA]
KEGG:04360	Axon guidance	KEGG_25.05.2022	2.42584e-07	5.94331e-05	1.35092e-15	3.2422e-14	[-1]	Group32	4.94506	9	[CDC42, CDK5, FYN, HRAS, KRAS, NRAS, RAC1, RAC3, RHOA]
KEGG:04370	VEGF signaling pathway	KEGG_25.05.2022	3.96757e-07	9.28411e-05	1.35092e-15	3.2422e-14	[-1]	Group32	10.1695	6	[CDC42, HRAS, KRAS, NRAS, RAC1, RAC3]
KEGG:04520	Adherens junction	KEGG_25.05.2022	5.0704e-08	1.38422e-05	1.35092e-15	3.2422e-14	[-1]	Group32	9.85915	7	[CDC42, FGFR1, FYN, RAC1, RAC3, RHOA, YES1]
KEGG:04650	Natural killer cell mediated cytotoxicity	KEGG_25.05.2022	3.36303e-06	0.000585167	1.35092e-15	3.2422e-14	[-1]	Group32	5.34351	7	[FYN, HRAS, KRAS, LCK, NRAS, RAC1, RAC3]
KEGG:04660	T cell receptor signaling pathway	KEGG_25.05.2022	3.87351e-08	1.07296e-05	1.35092e-15	3.2422e-14	[-1]	Group32	7.69231	8	[CDC42, CDK4, FYN, HRAS, KRAS, LCK, NRAS, RHOA]
KEGG:04662	B cell receptor signaling pathway	KEGG_25.05.2022	2.82009e-06	0.000501977	1.35092e-15	3.2422e-14	[-1]	Group32	7.31707	6	[HRAS, KRAS, LYN, NRAS, RAC1, RAC3]
KEGG:04664	Fc epsilon RI signaling pathway	KEGG_25.05.2022	3.7399e-08	1.03969e-05	1.35092e-15	3.2422e-14	[-1]	Group32	10.2941	7	[FYN, HRAS, KRAS, LYN, NRAS, RAC1, RAC3]
KEGG:04666	Fc gamma R-mediated phagocytosis	KEGG_25.05.2022	0.00125454	0.032618	1.35092e-15	3.2422e-14	[-1]	Group32	4.12371	4	[CDC42, HCK, LYN, RAC1]
KEGG:04722	Neurotrophin signaling pathway	KEGG_25.05.2022	2.42137e-05	0.00283301	1.35092e-15	3.2422e-14	[-1]	Group32	5.04202	6	[CDC42, HRAS, KRAS, NRAS, RAC1, RHOA]
KEGG:04730	Long-term depression	KEGG_25.05.2022	1.04596e-05	0.00145388	1.35092e-15	3.2422e-14	[-1]	Group32	8.33333	5	[HRAS, KRAS, LYN, NRAS, PPP2CA]
KEGG:04933	AGE-RAGE signaling pathway in diabetic complications	KEGG_25.05.2022	8.95325e-06	0.00128031	1.35092e-15	3.2422e-14	[-1]	Group32	6	6	[CDC42, CDK4, HRAS, KRAS, NRAS, RAC1]
KEGG:05100	Bacterial invasion of epithelial cells	KEGG_25.05.2022	1.94688e-06	0.000362119	1.35092e-15	3.2422e-14	[-1]	Group32	7.79221	6	[CDC42, RAC1, RHOA, SEPTIN11, SEPTIN8, SEPTIN9]
KEGG:05120	Epithelial cell signaling in Helicobacter pylori infection	KEGG_25.05.2022	0.00036662	0.0194309	1.35092e-15	3.2422e-14	[-1]	Group32	5.71429	4	[ATP6V1B2, CDC42, LYN, RAC1]
KEGG:05167	Kaposi sarcoma-associated herpesvirus infection	KEGG_25.05.2022	3.38865e-08	9.48823e-06	1.35092e-15	3.2422e-14	[-1]	Group32	5.15464	10	[CDK4, CDK6, HCK, HRAS, KRAS, LYN, NRAS, RAC1, RPS27A, UBA52]
KEGG:05210	Colorectal cancer	KEGG_25.05.2022	3.72819e-06	0.000637521	1.35092e-15	3.2422e-14	[-1]	Group32	6.97674	6	[HRAS, KRAS, NRAS, RAC1, RAC3, RHOA]
KEGG:05211	Renal cell carcinoma	KEGG_25.05.2022	2.07983e-05	0.00253739	1.35092e-15	3.2422e-14	[-1]	Group32	7.24638	5	[CDC42, HRAS, KRAS, NRAS, RAC1]
KEGG:05416	Viral myocarditis	KEGG_25.05.2022	0.00305802	0.0336383	1.35092e-15	3.2422e-14	[-1]	Group32	5	3	[FYN, RAC1, RAC3]
KEGG:04062	Chemokine signaling pathway	KEGG_25.05.2022	3.07165e-08	8.69276e-06	1.06329e-23	3.61518e-22	[-1]	Group33	5.20833	10	[CDC42, FGR, HCK, HRAS, KRAS, LYN, NRAS, RAC1, RAC3, RHOA]
KEGG:04071	Sphingolipid signaling pathway	KEGG_25.05.2022	1.11163e-07	2.90135e-05	1.06329e-23	3.61518e-22	[-1]	Group33	6.72269	8	[FYN, HRAS, KRAS, NRAS, PPP2CA, RAC1, RAC3, RHOA]
KEGG:04110	Cell cycle	KEGG_25.05.2022	1.00924e-08	3.01763e-06	1.06329e-23	3.61518e-22	[-1]	Group33	7.14286	9	[CDK1, CDK2, CDK4, CDK6, SFN, YWHAB, YWHAG, YWHAH, YWHAZ]
KEGG:04114	Oocyte meiosis	KEGG_25.05.2022	2.3386e-07	5.77635e-05	1.06329e-23	3.61518e-22	[-1]	Group33	6.10687	8	[CDK1, CDK2, PPP1CA, PPP2CA, YWHAB, YWHAG, YWHAH, YWHAZ]
KEGG:04115	p53 signaling pathway	KEGG_25.05.2022	2.7377e-05	0.0030936	1.06329e-23	3.61518e-22	[-1]	Group33	6.84932	5	[CDK1, CDK2, CDK4, CDK6, SFN]
KEGG:04137	Mitophagy	KEGG_25.05.2022	2.55991e-05	0.00296949	1.06329e-23	3.61518e-22	[-1]	Group33	6.94444	5	[HRAS, KRAS, NRAS, RPS27A, UBA52]
KEGG:04210	Apoptosis	KEGG_25.05.2022	5.13432e-05	0.00503163	1.06329e-23	3.61518e-22	[-1]	Group33	4.41176	6	[HRAS, KRAS, NRAS, TUBA3C, TUBA3D, TUBA3E]
KEGG:04360	Axon guidance	KEGG_25.05.2022	2.42584e-07	5.94331e-05	1.06329e-23	3.61518e-22	[-1]	Group33	4.94506	9	[CDC42, CDK5, FYN, HRAS, KRAS, NRAS, RAC1, RAC3, RHOA]
KEGG:04370	VEGF signaling pathway	KEGG_25.05.2022	3.96757e-07	9.28411e-05	1.06329e-23	3.61518e-22	[-1]	Group33	10.1695	6	[CDC42, HRAS, KRAS, NRAS, RAC1, RAC3]
KEGG:04390	Hippo signaling pathway	KEGG_25.05.2022	1.10866e-05	0.00151886	1.06329e-23	3.61518e-22	[-1]	Group33	4.4586	7	[CRB2, PPP1CA, PPP2CA, YWHAB, YWHAG, YWHAH, YWHAZ]
KEGG:04520	Adherens junction	KEGG_25.05.2022	5.0704e-08	1.38422e-05	1.06329e-23	3.61518e-22	[-1]	Group33	9.85915	7	[CDC42, FGFR1, FYN, RAC1, RAC3, RHOA, YES1]
KEGG:04530	Tight junction	KEGG_25.05.2022	1.6234e-06	0.000308446	1.06329e-23	3.61518e-22	[-1]	Group33	4.73373	8	[CDC42, CDK4, PPP2CA, RAC1, RHOA, TUBA3C, TUBA3D, TUBA3E]
KEGG:04540	Gap junction	KEGG_25.05.2022	2.26425e-07	5.61535e-05	1.06329e-23	3.61518e-22	[-1]	Group33	7.95455	7	[CDK1, HRAS, KRAS, NRAS, TUBA3C, TUBA3D, TUBA3E]
KEGG:04650	Natural killer cell mediated cytotoxicity	KEGG_25.05.2022	3.36303e-06	0.000585167	1.06329e-23	3.61518e-22	[-1]	Group33	5.34351	7	[FYN, HRAS, KRAS, LCK, NRAS, RAC1, RAC3]
KEGG:04662	B cell receptor signaling pathway	KEGG_25.05.2022	2.82009e-06	0.000501977	1.06329e-23	3.61518e-22	[-1]	Group33	7.31707	6	[HRAS, KRAS, LYN, NRAS, RAC1, RAC3]
KEGG:04664	Fc epsilon RI signaling pathway	KEGG_25.05.2022	3.7399e-08	1.03969e-05	1.06329e-23	3.61518e-22	[-1]	Group33	10.2941	7	[FYN, HRAS, KRAS, LYN, NRAS, RAC1, RAC3]
KEGG:04666	Fc gamma R-mediated phagocytosis	KEGG_25.05.2022	0.00125454	0.032618	1.06329e-23	3.61518e-22	[-1]	Group33	4.12371	4	[CDC42, HCK, LYN, RAC1]
KEGG:04722	Neurotrophin signaling pathway	KEGG_25.05.2022	2.42137e-05	0.00283301	1.06329e-23	3.61518e-22	[-1]	Group33	5.04202	6	[CDC42, HRAS, KRAS, NRAS, RAC1, RHOA]
KEGG:05100	Bacterial invasion of epithelial cells	KEGG_25.05.2022	1.94688e-06	0.000362119	1.06329e-23	3.61518e-22	[-1]	Group33	7.79221	6	[CDC42, RAC1, RHOA, SEPTIN11, SEPTIN8, SEPTIN9]
KEGG:05120	Epithelial cell signaling in Helicobacter pylori infection	KEGG_25.05.2022	0.00036662	0.0194309	1.06329e-23	3.61518e-22	[-1]	Group33	5.71429	4	[ATP6V1B2, CDC42, LYN, RAC1]
KEGG:05131	Shigellosis	KEGG_25.05.2022	1.99256e-10	6.95404e-08	1.06329e-23	3.61518e-22	[-1]	Group33	5.26316	13	[CDC42, H3-3A, H3-4, H3-5, H3C14, RAC1, RHOA, RPS27A, SEPTIN11, SEPTIN7, SEPTIN8, SEPTIN9, UBA52]
KEGG:05167	Kaposi sarcoma-associated herpesvirus infection	KEGG_25.05.2022	3.38865e-08	9.48823e-06	1.06329e-23	3.61518e-22	[-1]	Group33	5.15464	10	[CDK4, CDK6, HCK, HRAS, KRAS, LYN, NRAS, RAC1, RPS27A, UBA52]
KEGG:05210	Colorectal cancer	KEGG_25.05.2022	3.72819e-06	0.000637521	1.06329e-23	3.61518e-22	[-1]	Group33	6.97674	6	[HRAS, KRAS, NRAS, RAC1, RAC3, RHOA]
KEGG:05212	Pancreatic cancer	KEGG_25.05.2022	1.80215e-06	0.000338804	1.06329e-23	3.61518e-22	[-1]	Group33	7.89474	6	[CDC42, CDK4, CDK6, KRAS, RAC1, RAC3]
KEGG:05214	Glioma	KEGG_25.05.2022	3.12195e-05	0.00343415	1.06329e-23	3.61518e-22	[-1]	Group33	6.66667	5	[CDK4, CDK6, HRAS, KRAS, NRAS]
KEGG:05220	Chronic myeloid leukemia	KEGG_25.05.2022	3.32912e-05	0.00359544	1.06329e-23	3.61518e-22	[-1]	Group33	6.57895	5	[CDK4, CDK6, HRAS, KRAS, NRAS]
KEGG:05223	Non-small cell lung cancer	KEGG_25.05.2022	2.55991e-05	0.00296949	1.06329e-23	3.61518e-22	[-1]	Group33	6.94444	5	[CDK4, CDK6, HRAS, KRAS, NRAS]
KEGG:05231	Choline metabolism in cancer	KEGG_25.05.2022	0.000112555	0.00889185	1.06329e-23	3.61518e-22	[-1]	Group33	5.10204	5	[HRAS, KRAS, NRAS, RAC1, RAC3]
KEGG:05416	Viral myocarditis	KEGG_25.05.2022	0.00305802	0.0336383	1.06329e-23	3.61518e-22	[-1]	Group33	5	3	[FYN, RAC1, RAC3]
KEGG:04213	Longevity regulating pathway	KEGG_25.05.2022	0.00335633	0.0335633	8.38942e-20	2.76851e-18	[-1]	Group34	4.83871	3	[HRAS, KRAS, NRAS]
KEGG:04217	Necroptosis	KEGG_25.05.2022	3.35496e-14	1.26818e-11	8.38942e-20	2.76851e-18	[-1]	Group34	8.80503	14	[H2AC12, H2AC13, H2AC15, H2AC21, H2AC6, H2AC7, H2AJ, H2AW, H2AX, PYGB, PYGM, SLC25A31, SLC25A4, SLC25A6]
KEGG:04530	Tight junction	KEGG_25.05.2022	1.6234e-06	0.000308446	8.38942e-20	2.76851e-18	[-1]	Group34	4.73373	8	[CDC42, CDK4, PPP2CA, RAC1, RHOA, TUBA3C, TUBA3D, TUBA3E]
KEGG:04613	Neutrophil extracellular trap formation	KEGG_25.05.2022	3.65516e-17	1.41089e-14	8.38942e-20	2.76851e-18	[-1]	Group34	8.94737	17	[H2AC12, H2AC13, H2AC15, H2AC21, H2AC6, H2AC7, H2AJ, H2AW, H2AX, H3-3A, H3-4, H3-5, H3C14, RAC1, SLC25A31, SLC25A4, SLC25A6]
KEGG:04917	Prolactin signaling pathway	KEGG_25.05.2022	0.00472485	0.0236243	8.38942e-20	2.76851e-18	[-1]	Group34	4.28571	3	[HRAS, KRAS, NRAS]
KEGG:04929	GnRH secretion	KEGG_25.05.2022	0.00367187	0.0330468	8.38942e-20	2.76851e-18	[-1]	Group34	4.6875	3	[HRAS, KRAS, NRAS]
KEGG:05034	Alcoholism	KEGG_25.05.2022	2.78641e-17	1.07834e-14	8.38942e-20	2.76851e-18	[-1]	Group34	9.09091	17	[H2AC12, H2AC13, H2AC15, H2AC21, H2AC6, H2AC7, H2AJ, H2AW, H2AX, H3-3A, H3-4, H3-5, H3C14, HRAS, KRAS, NRAS, PPP1CA]
KEGG:05131	Shigellosis	KEGG_25.05.2022	1.99256e-10	6.95404e-08	8.38942e-20	2.76851e-18	[-1]	Group34	5.26316	13	[CDC42, H3-3A, H3-4, H3-5, H3C14, RAC1, RHOA, RPS27A, SEPTIN11, SEPTIN7, SEPTIN8, SEPTIN9, UBA52]
KEGG:05213	Endometrial cancer	KEGG_25.05.2022	0.00277664	0.0360963	8.38942e-20	2.76851e-18	[-1]	Group34	5.17241	3	[HRAS, KRAS, NRAS]
KEGG:05221	Acute myeloid leukemia	KEGG_25.05.2022	0.00417815	0.0292471	8.38942e-20	2.76851e-18	[-1]	Group34	4.47761	3	[HRAS, KRAS, NRAS]
KEGG:05322	Systemic lupus erythematosus	KEGG_25.05.2022	1.00293e-13	3.771e-11	8.38942e-20	2.76851e-18	[-1]	Group34	9.55882	13	[H2AC12, H2AC13, H2AC15, H2AC21, H2AC6, H2AC7, H2AJ, H2AW, H2AX, H3-3A, H3-4, H3-5, H3C14]
KEGG:04014	Ras signaling pathway	KEGG_25.05.2022	1.46765e-09	4.75519e-07	1.02189e-19	3.27005e-18	[-1]	Group35	5.10638	12	[CDC42, FGFR1, FGFR2, FGFR3, FGFR4, HRAS, KRAS, NRAS, RAC1, RAC3, RHOA, TEK]
KEGG:04015	Rap1 signaling pathway	KEGG_25.05.2022	4.05597e-10	1.3912e-07	1.02189e-19	3.27005e-18	[-1]	Group35	5.71429	12	[CDC42, FGFR1, FGFR2, FGFR3, FGFR4, HRAS, KRAS, NRAS, RAC1, RAC3, RHOA, TEK]
KEGG:04062	Chemokine signaling pathway	KEGG_25.05.2022	3.07165e-08	8.69276e-06	1.02189e-19	3.27005e-18	[-1]	Group35	5.20833	10	[CDC42, FGR, HCK, HRAS, KRAS, LYN, NRAS, RAC1, RAC3, RHOA]
KEGG:04071	Sphingolipid signaling pathway	KEGG_25.05.2022	1.11163e-07	2.90135e-05	1.02189e-19	3.27005e-18	[-1]	Group35	6.72269	8	[FYN, HRAS, KRAS, NRAS, PPP2CA, RAC1, RAC3, RHOA]
KEGG:04137	Mitophagy	KEGG_25.05.2022	2.55991e-05	0.00296949	1.02189e-19	3.27005e-18	[-1]	Group35	6.94444	5	[HRAS, KRAS, NRAS, RPS27A, UBA52]
KEGG:04151	PI3K-Akt signaling pathway	KEGG_25.05.2022	1.08884e-12	4.0396e-10	1.02189e-19	3.27005e-18	[-1]	Group35	4.80226	17	[CDK2, CDK4, CDK6, FGFR1, FGFR2, FGFR3, FGFR4, HRAS, KRAS, NRAS, PPP2CA, RAC1, TEK, YWHAB, YWHAG, YWHAH, YWHAZ]
KEGG:04210	Apoptosis	KEGG_25.05.2022	5.13432e-05	0.00503163	1.02189e-19	3.27005e-18	[-1]	Group35	4.41176	6	[HRAS, KRAS, NRAS, TUBA3C, TUBA3D, TUBA3E]
KEGG:04213	Longevity regulating pathway	KEGG_25.05.2022	0.00335633	0.0335633	1.02189e-19	3.27005e-18	[-1]	Group35	4.83871	3	[HRAS, KRAS, NRAS]
KEGG:04218	Cellular senescence	KEGG_25.05.2022	2.42704e-10	8.44608e-08	1.02189e-19	3.27005e-18	[-1]	Group35	7.05128	11	[CDK1, CDK2, CDK4, CDK6, HRAS, KRAS, NRAS, PPP1CA, SLC25A31, SLC25A4, SLC25A6]
KEGG:04360	Axon guidance	KEGG_25.05.2022	2.42584e-07	5.94331e-05	1.02189e-19	3.27005e-18	[-1]	Group35	4.94506	9	[CDC42, CDK5, FYN, HRAS, KRAS, NRAS, RAC1, RAC3, RHOA]
KEGG:04370	VEGF signaling pathway	KEGG_25.05.2022	3.96757e-07	9.28411e-05	1.02189e-19	3.27005e-18	[-1]	Group35	10.1695	6	[CDC42, HRAS, KRAS, NRAS, RAC1, RAC3]
KEGG:04520	Adherens junction	KEGG_25.05.2022	5.0704e-08	1.38422e-05	1.02189e-19	3.27005e-18	[-1]	Group35	9.85915	7	[CDC42, FGFR1, FYN, RAC1, RAC3, RHOA, YES1]
KEGG:04530	Tight junction	KEGG_25.05.2022	1.6234e-06	0.000308446	1.02189e-19	3.27005e-18	[-1]	Group35	4.73373	8	[CDC42, CDK4, PPP2CA, RAC1, RHOA, TUBA3C, TUBA3D, TUBA3E]
KEGG:04540	Gap junction	KEGG_25.05.2022	2.26425e-07	5.61535e-05	1.02189e-19	3.27005e-18	[-1]	Group35	7.95455	7	[CDK1, HRAS, KRAS, NRAS, TUBA3C, TUBA3D, TUBA3E]
KEGG:04550	Signaling pathways regulating pluripotency of stem cells	KEGG_25.05.2022	6.00901e-06	0.000919379	1.02189e-19	3.27005e-18	[-1]	Group35	4.8951	7	[FGFR1, FGFR2, FGFR3, FGFR4, HRAS, KRAS, NRAS]
KEGG:04650	Natural killer cell mediated cytotoxicity	KEGG_25.05.2022	3.36303e-06	0.000585167	1.02189e-19	3.27005e-18	[-1]	Group35	5.34351	7	[FYN, HRAS, KRAS, LCK, NRAS, RAC1, RAC3]
KEGG:04660	T cell receptor signaling pathway	KEGG_25.05.2022	3.87351e-08	1.07296e-05	1.02189e-19	3.27005e-18	[-1]	Group35	7.69231	8	[CDC42, CDK4, FYN, HRAS, KRAS, LCK, NRAS, RHOA]
KEGG:04662	B cell receptor signaling pathway	KEGG_25.05.2022	2.82009e-06	0.000501977	1.02189e-19	3.27005e-18	[-1]	Group35	7.31707	6	[HRAS, KRAS, LYN, NRAS, RAC1, RAC3]
KEGG:04664	Fc epsilon RI signaling pathway	KEGG_25.05.2022	3.7399e-08	1.03969e-05	1.02189e-19	3.27005e-18	[-1]	Group35	10.2941	7	[FYN, HRAS, KRAS, LYN, NRAS, RAC1, RAC3]
KEGG:04666	Fc gamma R-mediated phagocytosis	KEGG_25.05.2022	0.00125454	0.032618	1.02189e-19	3.27005e-18	[-1]	Group35	4.12371	4	[CDC42, HCK, LYN, RAC1]
KEGG:04720	Long-term potentiation	KEGG_25.05.2022	0.000309881	0.0176632	1.02189e-19	3.27005e-18	[-1]	Group35	5.97015	4	[HRAS, KRAS, NRAS, PPP1CA]
KEGG:04722	Neurotrophin signaling pathway	KEGG_25.05.2022	2.42137e-05	0.00283301	1.02189e-19	3.27005e-18	[-1]	Group35	5.04202	6	[CDC42, HRAS, KRAS, NRAS, RAC1, RHOA]
KEGG:04730	Long-term depression	KEGG_25.05.2022	1.04596e-05	0.00145388	1.02189e-19	3.27005e-18	[-1]	Group35	8.33333	5	[HRAS, KRAS, LYN, NRAS, PPP2CA]
KEGG:04810	Regulation of actin cytoskeleton	KEGG_25.05.2022	6.22983e-10	2.10568e-07	1.02189e-19	3.27005e-18	[-1]	Group35	5.50459	12	[CDC42, FGFR1, FGFR2, FGFR3, FGFR4, HRAS, KRAS, NRAS, PPP1CA, RAC1, RAC3, RHOA]
KEGG:04910	Insulin signaling pathway	KEGG_25.05.2022	5.34875e-05	0.00518828	1.02189e-19	3.27005e-18	[-1]	Group35	4.37956	6	[HRAS, KRAS, NRAS, PPP1CA, PYGB, PYGM]
KEGG:04912	GnRH signaling pathway	KEGG_25.05.2022	0.0010728	0.032184	1.02189e-19	3.27005e-18	[-1]	Group35	4.30108	4	[CDC42, HRAS, KRAS, NRAS]
KEGG:04917	Prolactin signaling pathway	KEGG_25.05.2022	0.00472485	0.0236243	1.02189e-19	3.27005e-18	[-1]	Group35	4.28571	3	[HRAS, KRAS, NRAS]
KEGG:04929	GnRH secretion	KEGG_25.05.2022	0.00367187	0.0330468	1.02189e-19	3.27005e-18	[-1]	Group35	4.6875	3	[HRAS, KRAS, NRAS]
KEGG:04933	AGE-RAGE signaling pathway in diabetic complications	KEGG_25.05.2022	8.95325e-06	0.00128031	1.02189e-19	3.27005e-18	[-1]	Group35	6	6	[CDC42, CDK4, HRAS, KRAS, NRAS, RAC1]
KEGG:05100	Bacterial invasion of epithelial cells	KEGG_25.05.2022	1.94688e-06	0.000362119	1.02189e-19	3.27005e-18	[-1]	Group35	7.79221	6	[CDC42, RAC1, RHOA, SEPTIN11, SEPTIN8, SEPTIN9]
KEGG:05120	Epithelial cell signaling in Helicobacter pylori infection	KEGG_25.05.2022	0.00036662	0.0194309	1.02189e-19	3.27005e-18	[-1]	Group35	5.71429	4	[ATP6V1B2, CDC42, LYN, RAC1]
KEGG:05160	Hepatitis C	KEGG_25.05.2022	2.59962e-10	9.02069e-08	1.02189e-19	3.27005e-18	[-1]	Group35	7.00637	11	[CDK2, CDK4, CDK6, HRAS, KRAS, NRAS, PPP2CA, YWHAB, YWHAG, YWHAH, YWHAZ]
KEGG:05166	Human T-cell leukemia virus 1 infection	KEGG_25.05.2022	1.28427e-06	0.000254286	1.02189e-19	3.27005e-18	[-1]	Group35	4.05405	9	[CDK2, CDK4, HRAS, KRAS, LCK, NRAS, SLC25A31, SLC25A4, SLC25A6]
KEGG:05167	Kaposi sarcoma-associated herpesvirus infection	KEGG_25.05.2022	3.38865e-08	9.48823e-06	1.02189e-19	3.27005e-18	[-1]	Group35	5.15464	10	[CDK4, CDK6, HCK, HRAS, KRAS, LYN, NRAS, RAC1, RPS27A, UBA52]
KEGG:05203	Viral carcinogenesis	KEGG_25.05.2022	5.56967e-14	2.09977e-11	1.02189e-19	3.27005e-18	[-1]	Group35	7.35294	15	[CDC42, CDK1, CDK2, CDK4, CDK6, HRAS, KRAS, LYN, NRAS, RAC1, RHOA, YWHAB, YWHAG, YWHAH, YWHAZ]
KEGG:05210	Colorectal cancer	KEGG_25.05.2022	3.72819e-06	0.000637521	1.02189e-19	3.27005e-18	[-1]	Group35	6.97674	6	[HRAS, KRAS, NRAS, RAC1, RAC3, RHOA]
KEGG:05211	Renal cell carcinoma	KEGG_25.05.2022	2.07983e-05	0.00253739	1.02189e-19	3.27005e-18	[-1]	Group35	7.24638	5	[CDC42, HRAS, KRAS, NRAS, RAC1]
KEGG:05212	Pancreatic cancer	KEGG_25.05.2022	1.80215e-06	0.000338804	1.02189e-19	3.27005e-18	[-1]	Group35	7.89474	6	[CDC42, CDK4, CDK6, KRAS, RAC1, RAC3]
KEGG:05213	Endometrial cancer	KEGG_25.05.2022	0.00277664	0.0360963	1.02189e-19	3.27005e-18	[-1]	Group35	5.17241	3	[HRAS, KRAS, NRAS]
KEGG:05214	Glioma	KEGG_25.05.2022	3.12195e-05	0.00343415	1.02189e-19	3.27005e-18	[-1]	Group35	6.66667	5	[CDK4, CDK6, HRAS, KRAS, NRAS]
KEGG:05215	Prostate cancer	KEGG_25.05.2022	7.50875e-06	0.00110379	1.02189e-19	3.27005e-18	[-1]	Group35	6.18557	6	[CDK2, FGFR1, FGFR2, HRAS, KRAS, NRAS]
KEGG:05216	Thyroid cancer	KEGG_25.05.2022	2.98268e-05	0.0033406	1.02189e-19	3.27005e-18	[-1]	Group35	10.8108	4	[HRAS, KRAS, NRAS, TPR]
KEGG:05218	Melanoma	KEGG_25.05.2022	1.30808e-06	0.000257691	1.02189e-19	3.27005e-18	[-1]	Group35	8.33333	6	[CDK4, CDK6, FGFR1, HRAS, KRAS, NRAS]
KEGG:05219	Bladder cancer	KEGG_25.05.2022	1.54301e-06	0.000294715	1.02189e-19	3.27005e-18	[-1]	Group35	12.1951	5	[CDK4, FGFR3, HRAS, KRAS, NRAS]
KEGG:05220	Chronic myeloid leukemia	KEGG_25.05.2022	3.32912e-05	0.00359544	1.02189e-19	3.27005e-18	[-1]	Group35	6.57895	5	[CDK4, CDK6, HRAS, KRAS, NRAS]
KEGG:05221	Acute myeloid leukemia	KEGG_25.05.2022	0.00417815	0.0292471	1.02189e-19	3.27005e-18	[-1]	Group35	4.47761	3	[HRAS, KRAS, NRAS]
KEGG:05223	Non-small cell lung cancer	KEGG_25.05.2022	2.55991e-05	0.00296949	1.02189e-19	3.27005e-18	[-1]	Group35	6.94444	5	[CDK4, CDK6, HRAS, KRAS, NRAS]
KEGG:05224	Breast cancer	KEGG_25.05.2022	7.91325e-05	0.00688453	1.02189e-19	3.27005e-18	[-1]	Group35	4.08163	6	[CDK4, CDK6, FGFR1, HRAS, KRAS, NRAS]
KEGG:05230	Central carbon metabolism in cancer	KEGG_25.05.2022	1.10629e-06	0.000224577	1.02189e-19	3.27005e-18	[-1]	Group35	8.57143	6	[FGFR1, FGFR2, FGFR3, HRAS, KRAS, NRAS]
KEGG:05231	Choline metabolism in cancer	KEGG_25.05.2022	0.000112555	0.00889185	1.02189e-19	3.27005e-18	[-1]	Group35	5.10204	5	[HRAS, KRAS, NRAS, RAC1, RAC3]
KEGG:05235	PD-L1 expression and PD-1 checkpoint pathway in cancer	KEGG_25.05.2022	0.000910402	0.0318641	1.02189e-19	3.27005e-18	[-1]	Group35	4.49438	4	[HRAS, KRAS, LCK, NRAS]
KEGG:05416	Viral myocarditis	KEGG_25.05.2022	0.00305802	0.0336383	1.02189e-19	3.27005e-18	[-1]	Group35	5	3	[FYN, RAC1, RAC3]
R-HSA:70171	Glycolysis	REACTOME_Pathways_25.05.2022	0.00491623	0.0196649	0.000989259	0.00197852	[-1]	Group01	4.22535	3	[GNPDA2, PPP2CA, TPR]
R-HSA:70326	Glucose metabolism	REACTOME_Pathways_25.05.2022	0.000989259	0.0326455	0.000989259	0.00197852	[-1]	Group01	4.3956	4	[GNPDA2, GOT2, PPP2CA, TPR]
R-HSA:180024	DARPP-32 events	REACTOME_Pathways_25.05.2022	0.000261597	0.0164806	0.000258375	0.0010335	[-1]	Group02	11.5385	3	[CDK5, PPP1CA, PPP2CA]
R-HSA:499943	Interconversion of nucleotide di- and triphosphates	REACTOME_Pathways_25.05.2022	0.000402817	0.0209465	0.00075228	0.00225684	[-1]	Group03	10	3	[AK2, AK9, NME2]
R-HSA:6796648	TP53 Regulates Transcription of DNA Repair Genes	REACTOME_Pathways_25.05.2022	0.00335633	0.0335633	0.00227016	0.00227016	[-1]	Group04	4.83871	3	[CDK12, CDK13, CDK9]
R-HSA:8982491	Glycogen metabolism	REACTOME_Pathways_25.05.2022	1.10483e-05	0.00152467	9.84215e-07	5.90529e-06	[-1]	Group05	13.7931	4	[PYGB, PYGM, RPS27A, UBA52]
R-HSA:193704	p75 NTR receptor-mediated signalling	REACTOME_Pathways_25.05.2022	0.00125454	0.032618	7.31239e-13	1.24311e-11	[-1]	Group08	4.12371	4	[RAC1, RHOA, RPS27A, UBA52]
R-HSA:195721	Signaling by WNT	REACTOME_Pathways_25.05.2022	6.2109e-11	2.21108e-08	7.31239e-13	1.24311e-11	[-1]	Group08	4.51807	15	[H2AC6, H2AC7, H2AJ, H2AX, H3-3A, H3-4, H3C14, KRAS, PPP2CA, RAC1, RAC3, RHOA, RPS27A, UBA52, YWHAZ]
R-HSA:5687128	MAPK6/MAPK4 signaling	REACTOME_Pathways_25.05.2022	4.55471e-06	0.000760637	7.31239e-13	1.24311e-11	[-1]	Group08	6.74157	6	[CDC42, CDK1, RAC1, RPS27A, SEPTIN7, UBA52]
R-HSA:450531	Regulation of mRNA stability by proteins that bind AU-rich elements	REACTOME_Pathways_25.05.2022	0.000872685	0.0314167	5.29013e-07	4.23211e-06	[-1]	Group09	4.54545	4	[RPS27A, UBA52, YWHAB, YWHAZ]
R-HSA:9614085	FOXO-mediated transcription	REACTOME_Pathways_25.05.2022	0.000275745	0.0168205	5.29013e-07	4.23211e-06	[-1]	Group09	6.15385	4	[SFN, YWHAB, YWHAG, YWHAZ]
R-HSA:9614399	Regulation of localization of FOXO transcription factors	REACTOME_Pathways_25.05.2022	1.6409e-07	4.1843e-05	5.29013e-07	4.23211e-06	[-1]	Group09	36.3636	4	[SFN, YWHAB, YWHAG, YWHAZ]
R-HSA:210993	Tie2 Signaling	REACTOME_Pathways_25.05.2022	1.4826e-06	0.000286141	1.54335e-07	1.38901e-06	[-1]	Group10	22.2222	4	[HRAS, KRAS, NRAS, TEK]
R-HSA:162906	HIV Infection	REACTOME_Pathways_25.05.2022	1.74272e-07	4.42651e-05	2.32924e-10	3.02802e-09	[-1]	Group11	4.329	10	[CDK9, FYN, HCK, LCK, RAC1, RPS27A, SLC25A4, SLC25A6, TPR, UBA52]
R-HSA:162909	Host Interactions of HIV factors	REACTOME_Pathways_25.05.2022	7.07282e-10	2.37647e-07	2.32924e-10	3.02802e-09	[-1]	Group11	7.69231	10	[CDK9, FYN, HCK, LCK, RAC1, RPS27A, SLC25A4, SLC25A6, TPR, UBA52]
R-HSA:176033	Interactions of Vpr with host cellular proteins	REACTOME_Pathways_25.05.2022	0.000693702	0.0291355	2.32924e-10	3.02802e-09	[-1]	Group11	8.33333	3	[SLC25A4, SLC25A6, TPR]
R-HSA:5625970	RHO GTPases activate KTN1	REACTOME_Pathways_25.05.2022	1.74975e-05	0.00220468	1.68775e-05	8.43874e-05	[-1]	Group12	27.2727	3	[CDC42, RAC1, RHOA]
R-HSA:2029480	Fcgamma receptor (FCGR) dependent phagocytosis	REACTOME_Pathways_25.05.2022	1.93155e-07	4.84818e-05	8.75385e-07	6.12769e-06	[-1]	Group13	8.13953	7	[CDC42, FGR, FYN, HCK, LYN, RAC1, YES1]
R-HSA:9664407	Parasite infection	REACTOME_Pathways_25.05.2022	1.36339e-08	4.03563e-06	8.75385e-07	6.12769e-06	[-1]	Group13	11.8644	7	[CDC42, FGR, FYN, HCK, LYN, RAC1, YES1]
R-HSA:9664417	Leishmania phagocytosis	REACTOME_Pathways_25.05.2022	1.36339e-08	4.03563e-06	8.75385e-07	6.12769e-06	[-1]	Group13	11.8644	7	[CDC42, FGR, FYN, HCK, LYN, RAC1, YES1]
R-HSA:9664422	FCGR3A-mediated phagocytosis	REACTOME_Pathways_25.05.2022	1.36339e-08	4.03563e-06	8.75385e-07	6.12769e-06	[-1]	Group13	11.8644	7	[CDC42, FGR, FYN, HCK, LYN, RAC1, YES1]
R-HSA:166520	Signaling by NTRKs	REACTOME_Pathways_25.05.2022	1.73227e-08	5.05824e-06	1.70456e-10	2.38638e-09	[-1]	Group14	6.71642	9	[CDK5, FYN, HRAS, KRAS, NRAS, PPP2CA, RAC1, RHOA, YWHAB]
R-HSA:2172127	DAP12 interactions	REACTOME_Pathways_25.05.2022	7.57295e-08	2.02198e-05	1.70456e-10	2.38638e-09	[-1]	Group14	13.3333	6	[FYN, HRAS, KRAS, LCK, NRAS, RAC1]
R-HSA:2424491	DAP12 signaling	REACTOME_Pathways_25.05.2022	5.85205e-09	1.79658e-06	1.70456e-10	2.38638e-09	[-1]	Group14	20	6	[FYN, HRAS, KRAS, LCK, NRAS, RAC1]
R-HSA:373755	Semaphorin interactions	REACTOME_Pathways_25.05.2022	0.000275745	0.0168205	1.70456e-10	2.38638e-09	[-1]	Group14	6.15385	4	[CDK5, FYN, RAC1, RHOA]
R-HSA:375165	NCAM signaling for neurite out-growth	REACTOME_Pathways_25.05.2022	1.33083e-05	0.00174339	1.70456e-10	2.38638e-09	[-1]	Group14	7.93651	5	[FGFR1, FYN, HRAS, KRAS, NRAS]
R-HSA:5621575	CD209 (DC-SIGN) signaling	REACTOME_Pathways_25.05.2022	4.52226e-08	1.2391e-05	1.70456e-10	2.38638e-09	[-1]	Group14	23.8095	5	[FYN, HRAS, KRAS, LYN, NRAS]
R-HSA:9006115	Signaling by NTRK2 (TRKB)	REACTOME_Pathways_25.05.2022	1.7797e-09	5.69503e-07	1.70456e-10	2.38638e-09	[-1]	Group14	24	6	[CDK5, FYN, HRAS, KRAS, NRAS, RAC1]
R-HSA:1169408	ISG15 antiviral mechanism	REACTOME_Pathways_25.05.2022	0.00511222	0.0153367	7.93847e-11	1.19077e-09	[-1]	Group15	4.16667	3	[RPS27A, TPR, UBA52]
R-HSA:162906	HIV Infection	REACTOME_Pathways_25.05.2022	1.74272e-07	4.42651e-05	7.93847e-11	1.19077e-09	[-1]	Group15	4.329	10	[CDK9, FYN, HCK, LCK, RAC1, RPS27A, SLC25A4, SLC25A6, TPR, UBA52]
R-HSA:162909	Host Interactions of HIV factors	REACTOME_Pathways_25.05.2022	7.07282e-10	2.37647e-07	7.93847e-11	1.19077e-09	[-1]	Group15	7.69231	10	[CDK9, FYN, HCK, LCK, RAC1, RPS27A, SLC25A4, SLC25A6, TPR, UBA52]
R-HSA:164944	Nef and signal transduction	REACTOME_Pathways_25.05.2022	3.51964e-08	9.8198e-06	7.93847e-11	1.19077e-09	[-1]	Group15	50	4	[FYN, HCK, LCK, RAC1]
R-HSA:164952	The role of Nef in HIV-1 replication and disease pathogenesis	REACTOME_Pathways_25.05.2022	9.55974e-06	0.00134792	7.93847e-11	1.19077e-09	[-1]	Group15	14.2857	4	[FYN, HCK, LCK, RAC1]
R-HSA:176033	Interactions of Vpr with host cellular proteins	REACTOME_Pathways_25.05.2022	0.000693702	0.0291355	7.93847e-11	1.19077e-09	[-1]	Group15	8.33333	3	[SLC25A4, SLC25A6, TPR]
R-HSA:2173793	Transcriptional activity of SMAD2/SMAD3:SMAD4 heterotrimer	REACTOME_Pathways_25.05.2022	0.00142428	0.0341826	7.93847e-11	1.19077e-09	[-1]	Group15	6.52174	3	[CDK9, RPS27A, UBA52]
R-HSA:2173796	SMAD2/SMAD3:SMAD4 heterotrimer regulates transcription	REACTOME_Pathways_25.05.2022	0.000488682	0.0234567	7.93847e-11	1.19077e-09	[-1]	Group15	9.375	3	[CDK9, RPS27A, UBA52]
R-HSA:512988	Interleukin-3, Interleukin-5 and GM-CSF signaling	REACTOME_Pathways_25.05.2022	3.07238e-09	9.67799e-07	7.93847e-11	1.19077e-09	[-1]	Group15	14.5833	7	[FYN, HCK, LYN, RPS27A, UBA52, YES1, YWHAZ]
R-HSA:912631	Regulation of signaling by CBL	REACTOME_Pathways_25.05.2022	7.58591e-10	2.54128e-07	7.93847e-11	1.19077e-09	[-1]	Group15	27.2727	6	[FYN, HCK, LYN, RPS27A, UBA52, YES1]
R-HSA:9607240	FLT3 Signaling	REACTOME_Pathways_25.05.2022	9.54158e-12	3.47313e-09	7.93847e-11	1.19077e-09	[-1]	Group15	21.0526	8	[FYN, HCK, HRAS, KRAS, LCK, NRAS, RPS27A, UBA52]
R-HSA:9706374	FLT3 signaling through SRC family kinases	REACTOME_Pathways_25.05.2022	2.15848e-06	0.000395002	7.93847e-11	1.19077e-09	[-1]	Group15	50	3	[FYN, HCK, LCK]
R-HSA:174143	APC/C-mediated degradation of cell cycle proteins	REACTOME_Pathways_25.05.2022	0.000872685	0.0314167	5.52784e-09	6.6334e-08	[-1]	Group16	4.54545	4	[CDK1, CDK2, RPS27A, UBA52]
R-HSA:176408	Regulation of APC/C activators between G1/S and early anaphase	REACTOME_Pathways_25.05.2022	0.000638861	0.0281099	5.52784e-09	6.6334e-08	[-1]	Group16	4.93827	4	[CDK1, CDK2, RPS27A, UBA52]
R-HSA:2995410	Nuclear Envelope (NE) Reassembly	REACTOME_Pathways_25.05.2022	3.12195e-05	0.00343415	5.52784e-09	6.6334e-08	[-1]	Group16	6.66667	5	[CDK1, PPP2CA, TUBA3C, TUBA3D, TUBA3E]
R-HSA:453274	Mitotic G2-G2/M phases	REACTOME_Pathways_25.05.2022	4.94191e-07	0.000111687	5.52784e-09	6.6334e-08	[-1]	Group16	4.54545	9	[CDK1, CDK2, PPP2CA, RPS27A, TUBA3C, TUBA3D, TUBA3E, UBA52, YWHAG]
R-HSA:453276	Regulation of mitotic cell cycle	REACTOME_Pathways_25.05.2022	0.000872685	0.0314167	5.52784e-09	6.6334e-08	[-1]	Group16	4.54545	4	[CDK1, CDK2, RPS27A, UBA52]
R-HSA:453279	Mitotic G1 phase and G1/S transition	REACTOME_Pathways_25.05.2022	6.2674e-07	0.000137883	5.52784e-09	6.6334e-08	[-1]	Group16	5.36913	8	[CDK1, CDK2, CDK4, CDK6, LYN, PPP2CA, RPS27A, UBA52]
R-HSA:6791312	TP53 Regulates Transcription of Cell Cycle Genes	REACTOME_Pathways_25.05.2022	0.00161154	0.0354539	5.52784e-09	6.6334e-08	[-1]	Group16	6.25	3	[CDK1, CDK2, SFN]
R-HSA:6804757	Regulation of TP53 Degradation	REACTOME_Pathways_25.05.2022	7.91176e-07	0.000168521	5.52784e-09	6.6334e-08	[-1]	Group16	13.8889	5	[CDK1, CDK2, PPP2CA, RPS27A, UBA52]
R-HSA:6806003	Regulation of TP53 Expression and Degradation	REACTOME_Pathways_25.05.2022	9.11314e-07	0.000189553	5.52784e-09	6.6334e-08	[-1]	Group16	13.5135	5	[CDK1, CDK2, PPP2CA, RPS27A, UBA52]
R-HSA:69206	G1/S Transition	REACTOME_Pathways_25.05.2022	4.16294e-05	0.0042462	5.52784e-09	6.6334e-08	[-1]	Group16	4.58015	6	[CDK1, CDK2, CDK4, PPP2CA, RPS27A, UBA52]
R-HSA:69273	Cyclin A/B1/B2 associated events during G2/M transition	REACTOME_Pathways_25.05.2022	0.000232224	0.0153268	5.52784e-09	6.6334e-08	[-1]	Group16	12	3	[CDK1, CDK2, PPP2CA]
R-HSA:69275	G2/M Transition	REACTOME_Pathways_25.05.2022	4.5375e-07	0.000104362	5.52784e-09	6.6334e-08	[-1]	Group16	4.59184	9	[CDK1, CDK2, PPP2CA, RPS27A, TUBA3C, TUBA3D, TUBA3E, UBA52, YWHAG]
R-HSA:75035	Chk1/Chk2(Cds1) mediated inactivation of Cyclin B:Cdk1 complex	REACTOME_Pathways_25.05.2022	1.80681e-11	6.5045e-09	5.52784e-09	6.6334e-08	[-1]	Group16	46.1538	6	[CDK1, SFN, YWHAB, YWHAG, YWHAH, YWHAZ]
R-HSA:8848021	Signaling by PTK6	REACTOME_Pathways_25.05.2022	4.33241e-12	1.58566e-09	7.07311e-17	2.0512e-15	[-1]	Group17	16.6667	9	[CDK2, CDK4, HRAS, KRAS, NRAS, RAC1, RHOA, RPS27A, UBA52]
R-HSA:9006927	Signaling by Non-Receptor Tyrosine Kinases	REACTOME_Pathways_25.05.2022	4.33241e-12	1.58566e-09	7.07311e-17	2.0512e-15	[-1]	Group17	16.6667	9	[CDK2, CDK4, HRAS, KRAS, NRAS, RAC1, RHOA, RPS27A, UBA52]
R-HSA:114604	GPVI-mediated activation cascade	REACTOME_Pathways_25.05.2022	1.56894e-08	4.61269e-06	3.34622e-16	9.03481e-15	[-1]	Group18	17.1429	6	[CDC42, FYN, LCK, LYN, RAC1, RHOA]
R-HSA:194138	Signaling by VEGF	REACTOME_Pathways_25.05.2022	9.19498e-07	0.000190336	3.34622e-16	9.03481e-15	[-1]	Group18	6.48148	7	[CDC42, FYN, HRAS, KRAS, NRAS, RAC1, RHOA]
R-HSA:2682334	EPH-Ephrin signaling	REACTOME_Pathways_25.05.2022	3.07598e-07	7.3516e-05	3.34622e-16	9.03481e-15	[-1]	Group18	7.6087	7	[CDC42, FYN, HRAS, LYN, RAC1, RHOA, YES1]
R-HSA:373752	Netrin-1 signaling	REACTOME_Pathways_25.05.2022	0.00181353	0.0362707	3.34622e-16	9.03481e-15	[-1]	Group18	6	3	[CDC42, FYN, RAC1]
R-HSA:3928662	EPHB-mediated forward signaling	REACTOME_Pathways_25.05.2022	1.15257e-09	3.79197e-07	3.34622e-16	9.03481e-15	[-1]	Group18	16.6667	7	[CDC42, FYN, HRAS, LYN, RAC1, RHOA, YES1]
R-HSA:418885	DCC mediated attractive signaling	REACTOME_Pathways_25.05.2022	3.81963e-05	0.00401061	3.34622e-16	9.03481e-15	[-1]	Group18	21.4286	3	[CDC42, FYN, RAC1]
R-HSA:4420097	VEGFA-VEGFR2 Pathway	REACTOME_Pathways_25.05.2022	5.08557e-07	0.000114425	3.34622e-16	9.03481e-15	[-1]	Group18	7.07071	7	[CDC42, FYN, HRAS, KRAS, NRAS, RAC1, RHOA]
R-HSA:5625970	RHO GTPases activate KTN1	REACTOME_Pathways_25.05.2022	1.74975e-05	0.00220468	3.34622e-16	9.03481e-15	[-1]	Group18	27.2727	3	[CDC42, RAC1, RHOA]
R-HSA:5663220	RHO GTPases Activate Formins	REACTOME_Pathways_25.05.2022	5.22445e-06	0.000841136	3.34622e-16	9.03481e-15	[-1]	Group18	5	7	[CDC42, PPP2CA, RAC1, RHOA, TUBA3C, TUBA3D, TUBA3E]
R-HSA:166520	Signaling by NTRKs	REACTOME_Pathways_25.05.2022	1.73227e-08	5.05824e-06	1.1873e-15	2.96826e-14	[-1]	Group19	6.71642	9	[CDK5, FYN, HRAS, KRAS, NRAS, PPP2CA, RAC1, RHOA, YWHAB]
R-HSA:194138	Signaling by VEGF	REACTOME_Pathways_25.05.2022	9.19498e-07	0.000190336	1.1873e-15	2.96826e-14	[-1]	Group19	6.48148	7	[CDC42, FYN, HRAS, KRAS, NRAS, RAC1, RHOA]
R-HSA:2871796	FCERI mediated MAPK activation	REACTOME_Pathways_25.05.2022	4.2912e-07	9.99849e-05	1.1873e-15	2.96826e-14	[-1]	Group19	15.625	5	[HRAS, KRAS, LYN, NRAS, RAC1]
R-HSA:4420097	VEGFA-VEGFR2 Pathway	REACTOME_Pathways_25.05.2022	5.08557e-07	0.000114425	1.1873e-15	2.96826e-14	[-1]	Group19	7.07071	7	[CDC42, FYN, HRAS, KRAS, NRAS, RAC1, RHOA]
R-HSA:75035	Chk1/Chk2(Cds1) mediated inactivation of Cyclin B:Cdk1 complex	REACTOME_Pathways_25.05.2022	1.80681e-11	6.5045e-09	1.1873e-15	2.96826e-14	[-1]	Group19	46.1538	6	[CDK1, SFN, YWHAB, YWHAG, YWHAH, YWHAZ]
R-HSA:8848021	Signaling by PTK6	REACTOME_Pathways_25.05.2022	4.33241e-12	1.58566e-09	1.1873e-15	2.96826e-14	[-1]	Group19	16.6667	9	[CDK2, CDK4, HRAS, KRAS, NRAS, RAC1, RHOA, RPS27A, UBA52]
R-HSA:8849471	PTK6 Regulates RHO GTPases, RAS GTPase and MAP kinases	REACTOME_Pathways_25.05.2022	4.56974e-09	1.42119e-06	1.1873e-15	2.96826e-14	[-1]	Group19	35.7143	5	[HRAS, KRAS, NRAS, RAC1, RHOA]
R-HSA:9006927	Signaling by Non-Receptor Tyrosine Kinases	REACTOME_Pathways_25.05.2022	4.33241e-12	1.58566e-09	1.1873e-15	2.96826e-14	[-1]	Group19	16.6667	9	[CDK2, CDK4, HRAS, KRAS, NRAS, RAC1, RHOA, RPS27A, UBA52]
R-HSA:174143	APC/C-mediated degradation of cell cycle proteins	REACTOME_Pathways_25.05.2022	0.000872685	0.0314167	6.72002e-27	2.35201e-25	[-1]	Group20	4.54545	4	[CDK1, CDK2, RPS27A, UBA52]
R-HSA:176408	Regulation of APC/C activators between G1/S and early anaphase	REACTOME_Pathways_25.05.2022	0.000638861	0.0281099	6.72002e-27	2.35201e-25	[-1]	Group20	4.93827	4	[CDK1, CDK2, RPS27A, UBA52]
R-HSA:187577	SCF(Skp2)-mediated degradation of p27/p21	REACTOME_Pathways_25.05.2022	0.000202297	0.0141608	6.72002e-27	2.35201e-25	[-1]	Group20	6.66667	4	[CDK2, CDK4, RPS27A, UBA52]
R-HSA:2559585	Oncogene Induced Senescence	REACTOME_Pathways_25.05.2022	1.87553e-05	0.00232566	6.72002e-27	2.35201e-25	[-1]	Group20	12.1212	4	[CDK4, CDK6, RPS27A, UBA52]
R-HSA:453276	Regulation of mitotic cell cycle	REACTOME_Pathways_25.05.2022	0.000872685	0.0314167	6.72002e-27	2.35201e-25	[-1]	Group20	4.54545	4	[CDK1, CDK2, RPS27A, UBA52]
R-HSA:453279	Mitotic G1 phase and G1/S transition	REACTOME_Pathways_25.05.2022	6.2674e-07	0.000137883	6.72002e-27	2.35201e-25	[-1]	Group20	5.36913	8	[CDK1, CDK2, CDK4, CDK6, LYN, PPP2CA, RPS27A, UBA52]
R-HSA:6791312	TP53 Regulates Transcription of Cell Cycle Genes	REACTOME_Pathways_25.05.2022	0.00161154	0.0354539	6.72002e-27	2.35201e-25	[-1]	Group20	6.25	3	[CDK1, CDK2, SFN]
R-HSA:69202	Cyclin E associated events during G1/S transition	REACTOME_Pathways_25.05.2022	0.000700461	0.0287189	6.72002e-27	2.35201e-25	[-1]	Group20	4.81928	4	[CDK2, CDK4, RPS27A, UBA52]
R-HSA:69206	G1/S Transition	REACTOME_Pathways_25.05.2022	4.16294e-05	0.0042462	6.72002e-27	2.35201e-25	[-1]	Group20	4.58015	6	[CDK1, CDK2, CDK4, PPP2CA, RPS27A, UBA52]
R-HSA:69231	Cyclin D associated events in G1	REACTOME_Pathways_25.05.2022	2.63464e-09	8.32547e-07	6.72002e-27	2.35201e-25	[-1]	Group20	14.8936	7	[CDK2, CDK4, CDK6, LYN, PPP2CA, RPS27A, UBA52]
R-HSA:69236	G1 Phase	REACTOME_Pathways_25.05.2022	2.63464e-09	8.32547e-07	6.72002e-27	2.35201e-25	[-1]	Group20	14.8936	7	[CDK2, CDK4, CDK6, LYN, PPP2CA, RPS27A, UBA52]
R-HSA:69273	Cyclin A/B1/B2 associated events during G2/M transition	REACTOME_Pathways_25.05.2022	0.000232224	0.0153268	6.72002e-27	2.35201e-25	[-1]	Group20	12	3	[CDK1, CDK2, PPP2CA]
R-HSA:69656	Cyclin A:Cdk2-associated events at S phase entry	REACTOME_Pathways_25.05.2022	0.000766152	0.0291138	6.72002e-27	2.35201e-25	[-1]	Group20	4.70588	4	[CDK2, CDK4, RPS27A, UBA52]
R-HSA:9659787	Aberrant regulation of mitotic G1/S transition in cancer due to RB1 defects	REACTOME_Pathways_25.05.2022	7.06089e-05	0.00649602	6.72002e-27	2.35201e-25	[-1]	Group20	17.6471	3	[CDK2, CDK4, CDK6]
R-HSA:9661069	Defective binding of RB1 mutants to E2F1,(E2F2, E2F3)	REACTOME_Pathways_25.05.2022	7.06089e-05	0.00649602	6.72002e-27	2.35201e-25	[-1]	Group20	17.6471	3	[CDK2, CDK4, CDK6]
R-HSA:9675126	Diseases of mitotic cell cycle	REACTOME_Pathways_25.05.2022	0.000813914	0.0301148	6.72002e-27	2.35201e-25	[-1]	Group20	7.89474	3	[CDK2, CDK4, CDK6]
R-HSA:9687139	Aberrant regulation of mitotic cell cycle due to RB1 defects	REACTOME_Pathways_25.05.2022	0.000693702	0.0291355	6.72002e-27	2.35201e-25	[-1]	Group20	8.33333	3	[CDK2, CDK4, CDK6]
R-HSA:112399	IRS-mediated signalling	REACTOME_Pathways_25.05.2022	3.07238e-09	9.67799e-07	6.68076e-12	1.06892e-10	[-1]	Group21	14.5833	7	[FGFR1, FGFR2, FGFR3, FGFR4, HRAS, KRAS, NRAS]
R-HSA:1226099	Signaling by FGFR in disease	REACTOME_Pathways_25.05.2022	2.17669e-08	6.22532e-06	6.68076e-12	1.06892e-10	[-1]	Group21	11.1111	7	[FGFR1, FGFR2, FGFR3, FGFR4, HRAS, KRAS, NRAS]
R-HSA:190236	Signaling by FGFR	REACTOME_Pathways_25.05.2022	1.25884e-11	4.5696e-09	6.68076e-12	1.06892e-10	[-1]	Group21	11.4943	10	[FGFR1, FGFR2, FGFR3, FGFR4, HRAS, KRAS, NRAS, PPP2CA, RPS27A, UBA52]
R-HSA:199418	Negative regulation of the PI3K/AKT network	REACTOME_Pathways_25.05.2022	7.42704e-08	1.99045e-05	6.68076e-12	1.06892e-10	[-1]	Group21	7.07965	8	[FGFR1, FGFR2, FGFR3, FGFR4, FYN, LCK, PPP2CA, RAC1]
R-HSA:2404192	Signaling by Type 1 Insulin-like Growth Factor 1 Receptor (IGF1R)	REACTOME_Pathways_25.05.2022	7.21801e-09	2.18706e-06	6.68076e-12	1.06892e-10	[-1]	Group21	12.963	7	[FGFR1, FGFR2, FGFR3, FGFR4, HRAS, KRAS, NRAS]
R-HSA:2428924	IGF1R signaling cascade	REACTOME_Pathways_25.05.2022	6.30705e-09	1.92996e-06	6.68076e-12	1.06892e-10	[-1]	Group21	13.2075	7	[FGFR1, FGFR2, FGFR3, FGFR4, HRAS, KRAS, NRAS]
R-HSA:2428928	IRS-related events triggered by IGF1R	REACTOME_Pathways_25.05.2022	5.49557e-09	1.69813e-06	6.68076e-12	1.06892e-10	[-1]	Group21	13.4615	7	[FGFR1, FGFR2, FGFR3, FGFR4, HRAS, KRAS, NRAS]
R-HSA:5673000	RAF activation	REACTOME_Pathways_25.05.2022	7.91176e-07	0.000168521	6.68076e-12	1.06892e-10	[-1]	Group21	13.8889	5	[HRAS, KRAS, NRAS, PPP2CA, YWHAB]
R-HSA:5673001	RAF/MAP kinase cascade	REACTOME_Pathways_25.05.2022	9.28905e-10	3.08396e-07	6.68076e-12	1.06892e-10	[-1]	Group21	4.64286	13	[FGFR1, FGFR2, FGFR3, FGFR4, FYN, HRAS, KRAS, NRAS, PPP2CA, RPS27A, TEK, UBA52, YWHAB]
R-HSA:5683057	MAPK family signaling cascades	REACTOME_Pathways_25.05.2022	2.74512e-13	1.02118e-10	6.68076e-12	1.06892e-10	[-1]	Group21	5.23077	17	[CDC42, CDK1, FGFR1, FGFR2, FGFR3, FGFR4, FYN, HRAS, KRAS, NRAS, PPP2CA, RAC1, RPS27A, SEPTIN7, TEK, UBA52, YWHAB]
R-HSA:5684996	MAPK1/MAPK3 signaling	REACTOME_Pathways_25.05.2022	9.9146e-11	3.50977e-08	6.68076e-12	1.06892e-10	[-1]	Group21	4.8951	14	[CDK1, FGFR1, FGFR2, FGFR3, FGFR4, FYN, HRAS, KRAS, NRAS, PPP2CA, RPS27A, TEK, UBA52, YWHAB]
R-HSA:6811558	PI5P, PP2A and IER3 Regulate PI3K/AKT Signaling	REACTOME_Pathways_25.05.2022	4.49962e-08	1.2374e-05	6.68076e-12	1.06892e-10	[-1]	Group21	7.54717	8	[FGFR1, FGFR2, FGFR3, FGFR4, FYN, LCK, PPP2CA, RAC1]
R-HSA:74751	Insulin receptor signalling cascade	REACTOME_Pathways_25.05.2022	7.21801e-09	2.18706e-06	6.68076e-12	1.06892e-10	[-1]	Group21	12.963	7	[FGFR1, FGFR2, FGFR3, FGFR4, HRAS, KRAS, NRAS]
R-HSA:74752	Signaling by Insulin receptor	REACTOME_Pathways_25.05.2022	3.90684e-09	1.22284e-06	6.68076e-12	1.06892e-10	[-1]	Group21	10.2564	8	[ATP6V1B2, FGFR1, FGFR2, FGFR3, FGFR4, HRAS, KRAS, NRAS]
R-HSA:3214815	HDACs deacetylate histones	REACTOME_Pathways_25.05.2022	1.74134e-08	5.0673e-06	1.84981e-17	5.54942e-16	[-1]	Group22	8.51064	8	[H2AC12, H2AC13, H2AC15, H2AC21, H2AC6, H2AC7, H2AW, H3C14]
R-HSA:3214847	HATs acetylate histones	REACTOME_Pathways_25.05.2022	4.34233e-07	0.000100742	1.84981e-17	5.54942e-16	[-1]	Group22	5.6338	8	[H2AC12, H2AC13, H2AC15, H2AC21, H2AC6, H2AC7, H2AW, H3C14]
R-HSA:3214858	RMTs methylate histone arginines	REACTOME_Pathways_25.05.2022	1.27742e-13	4.77754e-11	1.84981e-17	5.54942e-16	[-1]	Group22	13.9241	11	[CDK4, H2AC12, H2AC13, H2AC15, H2AC21, H2AC6, H2AC7, H2AJ, H2AW, H2AX, H3C14]
R-HSA:3247509	Chromatin modifying enzymes	REACTOME_Pathways_25.05.2022	8.75136e-08	2.31911e-05	1.84981e-17	5.54942e-16	[-1]	Group22	4.0146	11	[CDK4, H2AC12, H2AC13, H2AC15, H2AC21, H2AC6, H2AC7, H2AJ, H2AW, H2AX, H3C14]
R-HSA:4839726	Chromatin organization	REACTOME_Pathways_25.05.2022	8.75136e-08	2.31911e-05	1.84981e-17	5.54942e-16	[-1]	Group22	4.0146	11	[CDK4, H2AC12, H2AC13, H2AC15, H2AC21, H2AC6, H2AC7, H2AJ, H2AW, H2AX, H3C14]
R-HSA:5689603	UCH proteinases	REACTOME_Pathways_25.05.2022	1.54351e-09	4.98553e-07	1.84981e-17	5.54942e-16	[-1]	Group22	8.82353	9	[H2AC12, H2AC13, H2AC15, H2AC21, H2AC6, H2AC7, H2AW, RPS27A, UBA52]
R-HSA:5689880	Ub-specific processing proteases	REACTOME_Pathways_25.05.2022	1.19141e-06	0.000239474	1.84981e-17	5.54942e-16	[-1]	Group22	4.09091	9	[H2AC12, H2AC13, H2AC15, H2AC21, H2AC6, H2AC7, H2AW, RPS27A, UBA52]
R-HSA:5689901	Metalloprotease DUBs	REACTOME_Pathways_25.05.2022	1.08392e-13	4.06469e-11	1.84981e-17	5.54942e-16	[-1]	Group22	24.3243	9	[H2AC12, H2AC13, H2AC15, H2AC21, H2AC6, H2AC7, H2AW, RPS27A, UBA52]
R-HSA:9609646	HCMV Infection	REACTOME_Pathways_25.05.2022	1.70486e-11	6.15453e-09	1.84981e-17	5.54942e-16	[-1]	Group22	7.5	12	[H2AC12, H2AC13, H2AC15, H2AC21, H2AC6, H2AC7, H2AW, H3C14, TPR, TUBA3C, TUBA3D, TUBA3E]
R-HSA:9609690	HCMV Early Events	REACTOME_Pathways_25.05.2022	2.25873e-12	8.31211e-10	1.84981e-17	5.54942e-16	[-1]	Group22	8.88889	12	[H2AC12, H2AC13, H2AC15, H2AC21, H2AC6, H2AC7, H2AW, H3C14, TPR, TUBA3C, TUBA3D, TUBA3E]
R-HSA:9610379	HCMV Late Events	REACTOME_Pathways_25.05.2022	4.86095e-09	1.5069e-06	1.84981e-17	5.54942e-16	[-1]	Group22	7.75862	9	[H2AC12, H2AC13, H2AC15, H2AC21, H2AC6, H2AC7, H2AW, H3C14, TPR]
R-HSA:110328	Recognition and association of DNA glycosylase with site containing an affected pyrimidine	REACTOME_Pathways_25.05.2022	1.13502e-05	0.00154362	1.44233e-08	1.58657e-07	[-1]	Group23	8.19672	5	[H2AC6, H2AC7, H2AJ, H2AX, H3-4]
R-HSA:110329	Cleavage of the damaged pyrimidine	REACTOME_Pathways_25.05.2022	1.13502e-05	0.00154362	1.44233e-08	1.58657e-07	[-1]	Group23	8.19672	5	[H2AC6, H2AC7, H2AJ, H2AX, H3-4]
R-HSA:110330	Recognition and association of DNA glycosylase with site containing an affected purine	REACTOME_Pathways_25.05.2022	7.42785e-06	0.00109932	1.44233e-08	1.58657e-07	[-1]	Group23	8.92857	5	[H2AC6, H2AC7, H2AJ, H2AX, H3-4]
R-HSA:110331	Cleavage of the damaged purine	REACTOME_Pathways_25.05.2022	7.42785e-06	0.00109932	1.44233e-08	1.58657e-07	[-1]	Group23	8.92857	5	[H2AC6, H2AC7, H2AJ, H2AX, H3-4]
R-HSA:1221632	Meiotic synapsis	REACTOME_Pathways_25.05.2022	4.01511e-05	0.00417572	1.44233e-08	1.58657e-07	[-1]	Group23	6.32911	5	[H2AC6, H2AC7, H2AJ, H2AX, H3-4]
R-HSA:1474165	Reproduction	REACTOME_Pathways_25.05.2022	3.05426e-08	8.6741e-06	1.44233e-08	1.58657e-07	[-1]	Group23	6.29371	9	[CDK2, CDK4, H2AC6, H2AC7, H2AJ, H2AX, H3-3A, H3-4, H3C14]
R-HSA:1500620	Meiosis	REACTOME_Pathways_25.05.2022	5.65595e-09	1.74203e-06	1.44233e-08	1.58657e-07	[-1]	Group23	7.62712	9	[CDK2, CDK4, H2AC6, H2AC7, H2AJ, H2AX, H3-3A, H3-4, H3C14]
R-HSA:171306	Packaging Of Telomere Ends	REACTOME_Pathways_25.05.2022	5.13146e-06	0.000836427	1.44233e-08	1.58657e-07	[-1]	Group23	9.61539	5	[H2AC6, H2AC7, H2AJ, H2AX, H3-4]
R-HSA:2559586	DNA Damage/Telomere Stress Induced Senescence	REACTOME_Pathways_25.05.2022	2.43898e-06	0.000439017	1.44233e-08	1.58657e-07	[-1]	Group23	7.5	6	[CDK2, H2AC6, H2AC7, H2AJ, H2AX, H3-4]
R-HSA:5693565	Recruitment and ATM-mediated phosphorylation of repair and signaling proteins at DNA double strand breaks	REACTOME_Pathways_25.05.2022	0.000527346	0.0247852	1.44233e-08	1.58657e-07	[-1]	Group23	5.19481	4	[H2AX, H3-4, RPS27A, UBA52]
R-HSA:5693606	DNA Double Strand Break Response	REACTOME_Pathways_25.05.2022	0.00055381	0.0254753	1.44233e-08	1.58657e-07	[-1]	Group23	5.12821	4	[H2AX, H3-4, RPS27A, UBA52]
R-HSA:5693607	Processing of DNA double-strand break ends	REACTOME_Pathways_25.05.2022	0.000107219	0.00857751	1.44233e-08	1.58657e-07	[-1]	Group23	5.15464	5	[CDK2, H2AX, H3-4, RPS27A, UBA52]
R-HSA:73884	Base Excision Repair	REACTOME_Pathways_25.05.2022	8.33852e-05	0.00717113	1.44233e-08	1.58657e-07	[-1]	Group23	5.43478	5	[H2AC6, H2AC7, H2AJ, H2AX, H3-4]
R-HSA:73927	Depurination	REACTOME_Pathways_25.05.2022	7.42785e-06	0.00109932	1.44233e-08	1.58657e-07	[-1]	Group23	8.92857	5	[H2AC6, H2AC7, H2AJ, H2AX, H3-4]
R-HSA:73928	Depyrimidination	REACTOME_Pathways_25.05.2022	1.13502e-05	0.00154362	1.44233e-08	1.58657e-07	[-1]	Group23	8.19672	5	[H2AC6, H2AC7, H2AJ, H2AX, H3-4]
R-HSA:73929	Base-Excision Repair, AP Site Formation	REACTOME_Pathways_25.05.2022	1.33083e-05	0.00174339	1.44233e-08	1.58657e-07	[-1]	Group23	7.93651	5	[H2AC6, H2AC7, H2AJ, H2AX, H3-4]
R-HSA:912446	Meiotic recombination	REACTOME_Pathways_25.05.2022	3.30128e-10	1.13894e-07	1.44233e-08	1.58657e-07	[-1]	Group23	10.4651	9	[CDK2, CDK4, H2AC6, H2AC7, H2AJ, H2AX, H3-3A, H3-4, H3C14]
R-HSA:9670095	Inhibition of DNA recombination at telomere	REACTOME_Pathways_25.05.2022	9.30709e-07	0.000191726	1.44233e-08	1.58657e-07	[-1]	Group23	8.82353	6	[H2AC6, H2AC7, H2AJ, H2AX, H3-3A, H3-4]
R-HSA:109704	PI3K Cascade	REACTOME_Pathways_25.05.2022	5.97416e-05	0.00561571	1.36226e-16	3.81432e-15	[-1]	Group24	9.09091	4	[FGFR1, FGFR2, FGFR3, FGFR4]
R-HSA:112399	IRS-mediated signalling	REACTOME_Pathways_25.05.2022	3.07238e-09	9.67799e-07	1.36226e-16	3.81432e-15	[-1]	Group24	14.5833	7	[FGFR1, FGFR2, FGFR3, FGFR4, HRAS, KRAS, NRAS]
R-HSA:114604	GPVI-mediated activation cascade	REACTOME_Pathways_25.05.2022	1.56894e-08	4.61269e-06	1.36226e-16	3.81432e-15	[-1]	Group24	17.1429	6	[CDC42, FYN, LCK, LYN, RAC1, RHOA]
R-HSA:1226099	Signaling by FGFR in disease	REACTOME_Pathways_25.05.2022	2.17669e-08	6.22532e-06	1.36226e-16	3.81432e-15	[-1]	Group24	11.1111	7	[FGFR1, FGFR2, FGFR3, FGFR4, HRAS, KRAS, NRAS]
R-HSA:164944	Nef and signal transduction	REACTOME_Pathways_25.05.2022	3.51964e-08	9.8198e-06	1.36226e-16	3.81432e-15	[-1]	Group24	50	4	[FYN, HCK, LCK, RAC1]
R-HSA:164952	The role of Nef in HIV-1 replication and disease pathogenesis	REACTOME_Pathways_25.05.2022	9.55974e-06	0.00134792	1.36226e-16	3.81432e-15	[-1]	Group24	14.2857	4	[FYN, HCK, LCK, RAC1]
R-HSA:190236	Signaling by FGFR	REACTOME_Pathways_25.05.2022	1.25884e-11	4.5696e-09	1.36226e-16	3.81432e-15	[-1]	Group24	11.4943	10	[FGFR1, FGFR2, FGFR3, FGFR4, HRAS, KRAS, NRAS, PPP2CA, RPS27A, UBA52]
R-HSA:199418	Negative regulation of the PI3K/AKT network	REACTOME_Pathways_25.05.2022	7.42704e-08	1.99045e-05	1.36226e-16	3.81432e-15	[-1]	Group24	7.07965	8	[FGFR1, FGFR2, FGFR3, FGFR4, FYN, LCK, PPP2CA, RAC1]
R-HSA:2172127	DAP12 interactions	REACTOME_Pathways_25.05.2022	7.57295e-08	2.02198e-05	1.36226e-16	3.81432e-15	[-1]	Group24	13.3333	6	[FYN, HRAS, KRAS, LCK, NRAS, RAC1]
R-HSA:2219528	PI3K/AKT Signaling in Cancer	REACTOME_Pathways_25.05.2022	7.11608e-07	0.000152996	1.36226e-16	3.81432e-15	[-1]	Group24	6.73077	7	[FGFR1, FGFR2, FGFR3, FGFR4, FYN, LCK, RAC1]
R-HSA:2219530	Constitutive Signaling by Aberrant PI3K in Cancer	REACTOME_Pathways_25.05.2022	9.79978e-08	2.58714e-05	1.36226e-16	3.81432e-15	[-1]	Group24	8.97436	7	[FGFR1, FGFR2, FGFR3, FGFR4, FYN, LCK, RAC1]
R-HSA:2404192	Signaling by Type 1 Insulin-like Growth Factor 1 Receptor (IGF1R)	REACTOME_Pathways_25.05.2022	7.21801e-09	2.18706e-06	1.36226e-16	3.81432e-15	[-1]	Group24	12.963	7	[FGFR1, FGFR2, FGFR3, FGFR4, HRAS, KRAS, NRAS]
R-HSA:2424491	DAP12 signaling	REACTOME_Pathways_25.05.2022	5.85205e-09	1.79658e-06	1.36226e-16	3.81432e-15	[-1]	Group24	20	6	[FYN, HRAS, KRAS, LCK, NRAS, RAC1]
R-HSA:2428924	IGF1R signaling cascade	REACTOME_Pathways_25.05.2022	6.30705e-09	1.92996e-06	1.36226e-16	3.81432e-15	[-1]	Group24	13.2075	7	[FGFR1, FGFR2, FGFR3, FGFR4, HRAS, KRAS, NRAS]
R-HSA:2428928	IRS-related events triggered by IGF1R	REACTOME_Pathways_25.05.2022	5.49557e-09	1.69813e-06	1.36226e-16	3.81432e-15	[-1]	Group24	13.4615	7	[FGFR1, FGFR2, FGFR3, FGFR4, HRAS, KRAS, NRAS]
R-HSA:388841	Costimulation by the CD28 family	REACTOME_Pathways_25.05.2022	4.14585e-08	1.14426e-05	1.36226e-16	3.81432e-15	[-1]	Group24	10.1449	7	[CDC42, FYN, LCK, LYN, PPP2CA, RAC1, YES1]
R-HSA:389356	CD28 co-stimulation	REACTOME_Pathways_25.05.2022	1.07893e-08	3.2152e-06	1.36226e-16	3.81432e-15	[-1]	Group24	18.1818	6	[CDC42, FYN, LCK, LYN, RAC1, YES1]
R-HSA:389359	CD28 dependent Vav1 pathway	REACTOME_Pathways_25.05.2022	2.45225e-07	5.98348e-05	1.36226e-16	3.81432e-15	[-1]	Group24	33.3333	4	[CDC42, FYN, LCK, RAC1]
R-HSA:389513	CTLA4 inhibitory signaling	REACTOME_Pathways_25.05.2022	4.52226e-08	1.2391e-05	1.36226e-16	3.81432e-15	[-1]	Group24	23.8095	5	[FYN, LCK, LYN, PPP2CA, YES1]
R-HSA:5673001	RAF/MAP kinase cascade	REACTOME_Pathways_25.05.2022	9.28905e-10	3.08396e-07	1.36226e-16	3.81432e-15	[-1]	Group24	4.64286	13	[FGFR1, FGFR2, FGFR3, FGFR4, FYN, HRAS, KRAS, NRAS, PPP2CA, RPS27A, TEK, UBA52, YWHAB]
R-HSA:5683057	MAPK family signaling cascades	REACTOME_Pathways_25.05.2022	2.74512e-13	1.02118e-10	1.36226e-16	3.81432e-15	[-1]	Group24	5.23077	17	[CDC42, CDK1, FGFR1, FGFR2, FGFR3, FGFR4, FYN, HRAS, KRAS, NRAS, PPP2CA, RAC1, RPS27A, SEPTIN7, TEK, UBA52, YWHAB]
R-HSA:5684996	MAPK1/MAPK3 signaling	REACTOME_Pathways_25.05.2022	9.9146e-11	3.50977e-08	1.36226e-16	3.81432e-15	[-1]	Group24	4.8951	14	[CDK1, FGFR1, FGFR2, FGFR3, FGFR4, FYN, HRAS, KRAS, NRAS, PPP2CA, RPS27A, TEK, UBA52, YWHAB]
R-HSA:6811558	PI5P, PP2A and IER3 Regulate PI3K/AKT Signaling	REACTOME_Pathways_25.05.2022	4.49962e-08	1.2374e-05	1.36226e-16	3.81432e-15	[-1]	Group24	7.54717	8	[FGFR1, FGFR2, FGFR3, FGFR4, FYN, LCK, PPP2CA, RAC1]
R-HSA:74751	Insulin receptor signalling cascade	REACTOME_Pathways_25.05.2022	7.21801e-09	2.18706e-06	1.36226e-16	3.81432e-15	[-1]	Group24	12.963	7	[FGFR1, FGFR2, FGFR3, FGFR4, HRAS, KRAS, NRAS]
R-HSA:74752	Signaling by Insulin receptor	REACTOME_Pathways_25.05.2022	3.90684e-09	1.22284e-06	1.36226e-16	3.81432e-15	[-1]	Group24	10.2564	8	[ATP6V1B2, FGFR1, FGFR2, FGFR3, FGFR4, HRAS, KRAS, NRAS]
R-HSA:2029480	Fcgamma receptor (FCGR) dependent phagocytosis	REACTOME_Pathways_25.05.2022	1.93155e-07	4.84818e-05	4.27999e-14	8.55999e-13	[-1]	Group25	8.13953	7	[CDC42, FGR, FYN, HCK, LYN, RAC1, YES1]
R-HSA:2029481	FCGR activation	REACTOME_Pathways_25.05.2022	1.82168e-09	5.81116e-07	4.27999e-14	8.55999e-13	[-1]	Group25	41.6667	5	[FGR, FYN, HCK, LYN, YES1]
R-HSA:2871796	FCERI mediated MAPK activation	REACTOME_Pathways_25.05.2022	4.2912e-07	9.99849e-05	4.27999e-14	8.55999e-13	[-1]	Group25	15.625	5	[HRAS, KRAS, LYN, NRAS, RAC1]
R-HSA:5621575	CD209 (DC-SIGN) signaling	REACTOME_Pathways_25.05.2022	4.52226e-08	1.2391e-05	4.27999e-14	8.55999e-13	[-1]	Group25	23.8095	5	[FYN, HRAS, KRAS, LYN, NRAS]
R-HSA:9006335	Signaling by Erythropoietin	REACTOME_Pathways_25.05.2022	5.97221e-06	0.000925692	4.27999e-14	8.55999e-13	[-1]	Group25	16	4	[HRAS, KRAS, LYN, NRAS]
R-HSA:9027284	Erythropoietin activates RAS	REACTOME_Pathways_25.05.2022	4.92236e-07	0.000111738	4.27999e-14	8.55999e-13	[-1]	Group25	28.5714	4	[HRAS, KRAS, LYN, NRAS]
R-HSA:912631	Regulation of signaling by CBL	REACTOME_Pathways_25.05.2022	7.58591e-10	2.54128e-07	4.27999e-14	8.55999e-13	[-1]	Group25	27.2727	6	[FYN, HCK, LYN, RPS27A, UBA52, YES1]
R-HSA:9664323	FCGR3A-mediated IL10 synthesis	REACTOME_Pathways_25.05.2022	1.36002e-06	0.000266563	4.27999e-14	8.55999e-13	[-1]	Group25	12.5	5	[FGR, FYN, HCK, LYN, YES1]
R-HSA:9664407	Parasite infection	REACTOME_Pathways_25.05.2022	1.36339e-08	4.03563e-06	4.27999e-14	8.55999e-13	[-1]	Group25	11.8644	7	[CDC42, FGR, FYN, HCK, LYN, RAC1, YES1]
R-HSA:9664417	Leishmania phagocytosis	REACTOME_Pathways_25.05.2022	1.36339e-08	4.03563e-06	4.27999e-14	8.55999e-13	[-1]	Group25	11.8644	7	[CDC42, FGR, FYN, HCK, LYN, RAC1, YES1]
R-HSA:9664422	FCGR3A-mediated phagocytosis	REACTOME_Pathways_25.05.2022	1.36339e-08	4.03563e-06	4.27999e-14	8.55999e-13	[-1]	Group25	11.8644	7	[CDC42, FGR, FYN, HCK, LYN, RAC1, YES1]
R-HSA:9674555	Signaling by CSF3 (G-CSF)	REACTOME_Pathways_25.05.2022	3.05999e-07	7.34397e-05	4.27999e-14	8.55999e-13	[-1]	Group25	16.6667	5	[HCK, KRAS, LYN, RPS27A, UBA52]
R-HSA:9705462	Inactivation of CSF3 (G-CSF) signaling	REACTOME_Pathways_25.05.2022	5.97221e-06	0.000925692	4.27999e-14	8.55999e-13	[-1]	Group25	16	4	[HCK, LYN, RPS27A, UBA52]
R-HSA:983695	Antigen activates B Cell Receptor (BCR) leading to generation of second messengers	REACTOME_Pathways_25.05.2022	0.000488682	0.0234567	4.27999e-14	8.55999e-13	[-1]	Group25	9.375	3	[BLK, FYN, LYN]
R-HSA:112399	IRS-mediated signalling	REACTOME_Pathways_25.05.2022	3.07238e-09	9.67799e-07	3.09058e-14	6.49021e-13	[-1]	Group26	14.5833	7	[FGFR1, FGFR2, FGFR3, FGFR4, HRAS, KRAS, NRAS]
R-HSA:1168372	Downstream signaling events of B Cell Receptor (BCR)	REACTOME_Pathways_25.05.2022	5.09445e-05	0.0050435	3.09058e-14	6.49021e-13	[-1]	Group26	6.0241	5	[HRAS, KRAS, NRAS, RPS27A, UBA52]
R-HSA:1226099	Signaling by FGFR in disease	REACTOME_Pathways_25.05.2022	2.17669e-08	6.22532e-06	3.09058e-14	6.49021e-13	[-1]	Group26	11.1111	7	[FGFR1, FGFR2, FGFR3, FGFR4, HRAS, KRAS, NRAS]
R-HSA:1227986	Signaling by ERBB2	REACTOME_Pathways_25.05.2022	9.99062e-11	3.52669e-08	3.09058e-14	6.49021e-13	[-1]	Group26	16	8	[FYN, HRAS, KRAS, NRAS, RHOA, RPS27A, UBA52, YES1]
R-HSA:1236382	Constitutive Signaling by Ligand-Responsive EGFR Cancer Variants	REACTOME_Pathways_25.05.2022	2.60397e-08	7.4213e-06	3.09058e-14	6.49021e-13	[-1]	Group26	26.3158	5	[HRAS, KRAS, NRAS, RPS27A, UBA52]
R-HSA:1236394	Signaling by ERBB4	REACTOME_Pathways_25.05.2022	8.84255e-06	0.00127333	3.09058e-14	6.49021e-13	[-1]	Group26	8.62069	5	[HRAS, KRAS, NRAS, RPS27A, UBA52]
R-HSA:1643713	Signaling by EGFR in Cancer	REACTOME_Pathways_25.05.2022	1.16283e-07	3.02337e-05	3.09058e-14	6.49021e-13	[-1]	Group26	20	5	[HRAS, KRAS, NRAS, RPS27A, UBA52]
R-HSA:166520	Signaling by NTRKs	REACTOME_Pathways_25.05.2022	1.73227e-08	5.05824e-06	3.09058e-14	6.49021e-13	[-1]	Group26	6.71642	9	[CDK5, FYN, HRAS, KRAS, NRAS, PPP2CA, RAC1, RHOA, YWHAB]
R-HSA:177929	Signaling by EGFR	REACTOME_Pathways_25.05.2022	1.44904e-07	3.70953e-05	3.09058e-14	6.49021e-13	[-1]	Group26	12	6	[CDC42, HRAS, KRAS, NRAS, RPS27A, UBA52]
R-HSA:190236	Signaling by FGFR	REACTOME_Pathways_25.05.2022	1.25884e-11	4.5696e-09	3.09058e-14	6.49021e-13	[-1]	Group26	11.4943	10	[FGFR1, FGFR2, FGFR3, FGFR4, HRAS, KRAS, NRAS, PPP2CA, RPS27A, UBA52]
R-HSA:194138	Signaling by VEGF	REACTOME_Pathways_25.05.2022	9.19498e-07	0.000190336	3.09058e-14	6.49021e-13	[-1]	Group26	6.48148	7	[CDC42, FYN, HRAS, KRAS, NRAS, RAC1, RHOA]
R-HSA:199418	Negative regulation of the PI3K/AKT network	REACTOME_Pathways_25.05.2022	7.42704e-08	1.99045e-05	3.09058e-14	6.49021e-13	[-1]	Group26	7.07965	8	[FGFR1, FGFR2, FGFR3, FGFR4, FYN, LCK, PPP2CA, RAC1]
R-HSA:2219528	PI3K/AKT Signaling in Cancer	REACTOME_Pathways_25.05.2022	7.11608e-07	0.000152996	3.09058e-14	6.49021e-13	[-1]	Group26	6.73077	7	[FGFR1, FGFR2, FGFR3, FGFR4, FYN, LCK, RAC1]
R-HSA:2219530	Constitutive Signaling by Aberrant PI3K in Cancer	REACTOME_Pathways_25.05.2022	9.79978e-08	2.58714e-05	3.09058e-14	6.49021e-13	[-1]	Group26	8.97436	7	[FGFR1, FGFR2, FGFR3, FGFR4, FYN, LCK, RAC1]
R-HSA:2404192	Signaling by Type 1 Insulin-like Growth Factor 1 Receptor (IGF1R)	REACTOME_Pathways_25.05.2022	7.21801e-09	2.18706e-06	3.09058e-14	6.49021e-13	[-1]	Group26	12.963	7	[FGFR1, FGFR2, FGFR3, FGFR4, HRAS, KRAS, NRAS]
R-HSA:2428924	IGF1R signaling cascade	REACTOME_Pathways_25.05.2022	6.30705e-09	1.92996e-06	3.09058e-14	6.49021e-13	[-1]	Group26	13.2075	7	[FGFR1, FGFR2, FGFR3, FGFR4, HRAS, KRAS, NRAS]
R-HSA:2428928	IRS-related events triggered by IGF1R	REACTOME_Pathways_25.05.2022	5.49557e-09	1.69813e-06	3.09058e-14	6.49021e-13	[-1]	Group26	13.4615	7	[FGFR1, FGFR2, FGFR3, FGFR4, HRAS, KRAS, NRAS]
R-HSA:2454202	Fc epsilon receptor (FCERI) signaling	REACTOME_Pathways_25.05.2022	2.78386e-07	6.76478e-05	3.09058e-14	6.49021e-13	[-1]	Group26	5.97015	8	[FYN, HRAS, KRAS, LYN, NRAS, RAC1, RPS27A, UBA52]
R-HSA:375165	NCAM signaling for neurite out-growth	REACTOME_Pathways_25.05.2022	1.33083e-05	0.00174339	3.09058e-14	6.49021e-13	[-1]	Group26	7.93651	5	[FGFR1, FYN, HRAS, KRAS, NRAS]
R-HSA:4420097	VEGFA-VEGFR2 Pathway	REACTOME_Pathways_25.05.2022	5.08557e-07	0.000114425	3.09058e-14	6.49021e-13	[-1]	Group26	7.07071	7	[CDC42, FYN, HRAS, KRAS, NRAS, RAC1, RHOA]
R-HSA:5621481	C-type lectin receptors (CLRs)	REACTOME_Pathways_25.05.2022	5.73729e-06	0.000900755	3.09058e-14	6.49021e-13	[-1]	Group26	4.92958	7	[FYN, HRAS, KRAS, LYN, NRAS, RPS27A, UBA52]
R-HSA:5637815	Signaling by Ligand-Responsive EGFR Variants in Cancer	REACTOME_Pathways_25.05.2022	2.60397e-08	7.4213e-06	3.09058e-14	6.49021e-13	[-1]	Group26	26.3158	5	[HRAS, KRAS, NRAS, RPS27A, UBA52]
R-HSA:5654736	Signaling by FGFR1	REACTOME_Pathways_25.05.2022	4.13536e-09	1.29023e-06	3.09058e-14	6.49021e-13	[-1]	Group26	14	7	[FGFR1, HRAS, KRAS, NRAS, PPP2CA, RPS27A, UBA52]
R-HSA:5654738	Signaling by FGFR2	REACTOME_Pathways_25.05.2022	6.16357e-08	1.67649e-05	3.09058e-14	6.49021e-13	[-1]	Group26	9.58904	7	[FGFR2, HRAS, KRAS, NRAS, PPP2CA, RPS27A, UBA52]
R-HSA:5654741	Signaling by FGFR3	REACTOME_Pathways_25.05.2022	8.02773e-10	2.67323e-07	3.09058e-14	6.49021e-13	[-1]	Group26	17.5	7	[FGFR3, HRAS, KRAS, NRAS, PPP2CA, RPS27A, UBA52]
R-HSA:5654743	Signaling by FGFR4	REACTOME_Pathways_25.05.2022	9.64257e-10	3.19169e-07	3.09058e-14	6.49021e-13	[-1]	Group26	17.0732	7	[FGFR4, HRAS, KRAS, NRAS, PPP2CA, RPS27A, UBA52]
R-HSA:5658442	Regulation of RAS by GAPs	REACTOME_Pathways_25.05.2022	1.93647e-05	0.00238186	3.09058e-14	6.49021e-13	[-1]	Group26	7.35294	5	[HRAS, KRAS, NRAS, RPS27A, UBA52]
R-HSA:5673000	RAF activation	REACTOME_Pathways_25.05.2022	7.91176e-07	0.000168521	3.09058e-14	6.49021e-13	[-1]	Group26	13.8889	5	[HRAS, KRAS, NRAS, PPP2CA, YWHAB]
R-HSA:5673001	RAF/MAP kinase cascade	REACTOME_Pathways_25.05.2022	9.28905e-10	3.08396e-07	3.09058e-14	6.49021e-13	[-1]	Group26	4.64286	13	[FGFR1, FGFR2, FGFR3, FGFR4, FYN, HRAS, KRAS, NRAS, PPP2CA, RPS27A, TEK, UBA52, YWHAB]
R-HSA:5675221	Negative regulation of MAPK pathway	REACTOME_Pathways_25.05.2022	1.37129e-09	4.47041e-07	3.09058e-14	6.49021e-13	[-1]	Group26	16.2791	7	[HRAS, KRAS, NRAS, PPP2CA, RPS27A, UBA52, YWHAB]
R-HSA:5683057	MAPK family signaling cascades	REACTOME_Pathways_25.05.2022	2.74512e-13	1.02118e-10	3.09058e-14	6.49021e-13	[-1]	Group26	5.23077	17	[CDC42, CDK1, FGFR1, FGFR2, FGFR3, FGFR4, FYN, HRAS, KRAS, NRAS, PPP2CA, RAC1, RPS27A, SEPTIN7, TEK, UBA52, YWHAB]
R-HSA:5684996	MAPK1/MAPK3 signaling	REACTOME_Pathways_25.05.2022	9.9146e-11	3.50977e-08	3.09058e-14	6.49021e-13	[-1]	Group26	4.8951	14	[CDK1, FGFR1, FGFR2, FGFR3, FGFR4, FYN, HRAS, KRAS, NRAS, PPP2CA, RPS27A, TEK, UBA52, YWHAB]
R-HSA:5687128	MAPK6/MAPK4 signaling	REACTOME_Pathways_25.05.2022	4.55471e-06	0.000760637	3.09058e-14	6.49021e-13	[-1]	Group26	6.74157	6	[CDC42, CDK1, RAC1, RPS27A, SEPTIN7, UBA52]
R-HSA:6806834	Signaling by MET	REACTOME_Pathways_25.05.2022	2.26483e-06	0.000412198	3.09058e-14	6.49021e-13	[-1]	Group26	7.59494	6	[HRAS, KRAS, NRAS, RAC1, RPS27A, UBA52]
R-HSA:6811558	PI5P, PP2A and IER3 Regulate PI3K/AKT Signaling	REACTOME_Pathways_25.05.2022	4.49962e-08	1.2374e-05	3.09058e-14	6.49021e-13	[-1]	Group26	7.54717	8	[FGFR1, FGFR2, FGFR3, FGFR4, FYN, LCK, PPP2CA, RAC1]
R-HSA:74751	Insulin receptor signalling cascade	REACTOME_Pathways_25.05.2022	7.21801e-09	2.18706e-06	3.09058e-14	6.49021e-13	[-1]	Group26	12.963	7	[FGFR1, FGFR2, FGFR3, FGFR4, HRAS, KRAS, NRAS]
R-HSA:74752	Signaling by Insulin receptor	REACTOME_Pathways_25.05.2022	3.90684e-09	1.22284e-06	3.09058e-14	6.49021e-13	[-1]	Group26	10.2564	8	[ATP6V1B2, FGFR1, FGFR2, FGFR3, FGFR4, HRAS, KRAS, NRAS]
R-HSA:9607240	FLT3 Signaling	REACTOME_Pathways_25.05.2022	9.54158e-12	3.47313e-09	3.09058e-14	6.49021e-13	[-1]	Group26	21.0526	8	[FYN, HCK, HRAS, KRAS, LCK, NRAS, RPS27A, UBA52]
R-HSA:9648002	RAS processing	REACTOME_Pathways_25.05.2022	1.75346e-07	4.43625e-05	3.09058e-14	6.49021e-13	[-1]	Group26	18.5185	5	[HRAS, KRAS, NRAS, RPS27A, UBA52]
R-HSA:9682385	FLT3 signaling in disease	REACTOME_Pathways_25.05.2022	2.12651e-07	5.31628e-05	3.09058e-14	6.49021e-13	[-1]	Group26	17.8571	5	[HRAS, KRAS, NRAS, RPS27A, UBA52]
R-HSA:983705	Signaling by the B Cell Receptor (BCR)	REACTOME_Pathways_25.05.2022	6.9285e-08	1.86377e-05	3.09058e-14	6.49021e-13	[-1]	Group26	7.14286	8	[BLK, FYN, HRAS, KRAS, LYN, NRAS, RPS27A, UBA52]
R-HSA:109606	Intrinsic Pathway for Apoptosis	REACTOME_Pathways_25.05.2022	6.79048e-06	0.00101857	1.17968e-17	3.65701e-16	[-1]	Group27	9.09091	5	[SFN, YWHAB, YWHAG, YWHAH, YWHAZ]
R-HSA:111447	Activation of BAD and translocation to mitochondria	REACTOME_Pathways_25.05.2022	6.82847e-09	2.08268e-06	1.17968e-17	3.65701e-16	[-1]	Group27	33.3333	5	[SFN, YWHAB, YWHAG, YWHAH, YWHAZ]
R-HSA:114452	Activation of BH3-only proteins	REACTOME_Pathways_25.05.2022	3.05999e-07	7.34397e-05	1.17968e-17	3.65701e-16	[-1]	Group27	16.6667	5	[SFN, YWHAB, YWHAG, YWHAH, YWHAZ]
R-HSA:1169408	ISG15 antiviral mechanism	REACTOME_Pathways_25.05.2022	0.00511222	0.0153367	1.17968e-17	3.65701e-16	[-1]	Group27	4.16667	3	[RPS27A, TPR, UBA52]
R-HSA:1445148	Translocation of SLC2A4 (GLUT4) to the plasma membrane	REACTOME_Pathways_25.05.2022	6.45783e-11	2.29253e-08	1.17968e-17	3.65701e-16	[-1]	Group27	12.5	9	[RAC1, SFN, TUBA3C, TUBA3D, TUBA3E, YWHAB, YWHAG, YWHAH, YWHAZ]
R-HSA:174143	APC/C-mediated degradation of cell cycle proteins	REACTOME_Pathways_25.05.2022	0.000872685	0.0314167	1.17968e-17	3.65701e-16	[-1]	Group27	4.54545	4	[CDK1, CDK2, RPS27A, UBA52]
R-HSA:176408	Regulation of APC/C activators between G1/S and early anaphase	REACTOME_Pathways_25.05.2022	0.000638861	0.0281099	1.17968e-17	3.65701e-16	[-1]	Group27	4.93827	4	[CDK1, CDK2, RPS27A, UBA52]
R-HSA:201681	TCF dependent signaling in response to WNT	REACTOME_Pathways_25.05.2022	1.66827e-08	4.88803e-06	1.17968e-17	3.65701e-16	[-1]	Group27	4.72103	11	[H2AC6, H2AC7, H2AJ, H2AX, H3-3A, H3-4, H3C14, PPP2CA, RPS27A, UBA52, YWHAZ]
R-HSA:2565942	Regulation of PLK1 Activity at G2/M Transition	REACTOME_Pathways_25.05.2022	0.000872685	0.0314167	1.17968e-17	3.65701e-16	[-1]	Group27	4.54545	4	[CDK1, RPS27A, UBA52, YWHAG]
R-HSA:3769402	Deactivation of the beta-catenin transactivating complex	REACTOME_Pathways_25.05.2022	0.00109225	0.0316752	1.17968e-17	3.65701e-16	[-1]	Group27	7.14286	3	[RPS27A, UBA52, YWHAZ]
R-HSA:450531	Regulation of mRNA stability by proteins that bind AU-rich elements	REACTOME_Pathways_25.05.2022	0.000872685	0.0314167	1.17968e-17	3.65701e-16	[-1]	Group27	4.54545	4	[RPS27A, UBA52, YWHAB, YWHAZ]
R-HSA:453274	Mitotic G2-G2/M phases	REACTOME_Pathways_25.05.2022	4.94191e-07	0.000111687	1.17968e-17	3.65701e-16	[-1]	Group27	4.54545	9	[CDK1, CDK2, PPP2CA, RPS27A, TUBA3C, TUBA3D, TUBA3E, UBA52, YWHAG]
R-HSA:453276	Regulation of mitotic cell cycle	REACTOME_Pathways_25.05.2022	0.000872685	0.0314167	1.17968e-17	3.65701e-16	[-1]	Group27	4.54545	4	[CDK1, CDK2, RPS27A, UBA52]
R-HSA:453279	Mitotic G1 phase and G1/S transition	REACTOME_Pathways_25.05.2022	6.2674e-07	0.000137883	1.17968e-17	3.65701e-16	[-1]	Group27	5.36913	8	[CDK1, CDK2, CDK4, CDK6, LYN, PPP2CA, RPS27A, UBA52]
R-HSA:5625740	RHO GTPases activate PKNs	REACTOME_Pathways_25.05.2022	8.48993e-16	3.26013e-13	1.17968e-17	3.65701e-16	[-1]	Group27	13.6842	13	[H2AC6, H2AC7, H2AJ, H2AX, H3-3A, H3C14, RAC1, RHOA, SFN, YWHAB, YWHAG, YWHAH, YWHAZ]
R-HSA:5628897	TP53 Regulates Metabolic Genes	REACTOME_Pathways_25.05.2022	6.38546e-05	0.00593848	1.17968e-17	3.65701e-16	[-1]	Group27	5.74713	5	[SFN, YWHAB, YWHAG, YWHAH, YWHAZ]
R-HSA:5693565	Recruitment and ATM-mediated phosphorylation of repair and signaling proteins at DNA double strand breaks	REACTOME_Pathways_25.05.2022	0.000527346	0.0247852	1.17968e-17	3.65701e-16	[-1]	Group27	5.19481	4	[H2AX, H3-4, RPS27A, UBA52]
R-HSA:5693606	DNA Double Strand Break Response	REACTOME_Pathways_25.05.2022	0.00055381	0.0254753	1.17968e-17	3.65701e-16	[-1]	Group27	5.12821	4	[H2AX, H3-4, RPS27A, UBA52]
R-HSA:5693607	Processing of DNA double-strand break ends	REACTOME_Pathways_25.05.2022	0.000107219	0.00857751	1.17968e-17	3.65701e-16	[-1]	Group27	5.15464	5	[CDK2, H2AX, H3-4, RPS27A, UBA52]
R-HSA:6791312	TP53 Regulates Transcription of Cell Cycle Genes	REACTOME_Pathways_25.05.2022	0.00161154	0.0354539	1.17968e-17	3.65701e-16	[-1]	Group27	6.25	3	[CDK1, CDK2, SFN]
R-HSA:6804757	Regulation of TP53 Degradation	REACTOME_Pathways_25.05.2022	7.91176e-07	0.000168521	1.17968e-17	3.65701e-16	[-1]	Group27	13.8889	5	[CDK1, CDK2, PPP2CA, RPS27A, UBA52]
R-HSA:6806003	Regulation of TP53 Expression and Degradation	REACTOME_Pathways_25.05.2022	9.11314e-07	0.000189553	1.17968e-17	3.65701e-16	[-1]	Group27	13.5135	5	[CDK1, CDK2, PPP2CA, RPS27A, UBA52]
R-HSA:69206	G1/S Transition	REACTOME_Pathways_25.05.2022	4.16294e-05	0.0042462	1.17968e-17	3.65701e-16	[-1]	Group27	4.58015	6	[CDK1, CDK2, CDK4, PPP2CA, RPS27A, UBA52]
R-HSA:69273	Cyclin A/B1/B2 associated events during G2/M transition	REACTOME_Pathways_25.05.2022	0.000232224	0.0153268	1.17968e-17	3.65701e-16	[-1]	Group27	12	3	[CDK1, CDK2, PPP2CA]
R-HSA:69275	G2/M Transition	REACTOME_Pathways_25.05.2022	4.5375e-07	0.000104362	1.17968e-17	3.65701e-16	[-1]	Group27	4.59184	9	[CDK1, CDK2, PPP2CA, RPS27A, TUBA3C, TUBA3D, TUBA3E, UBA52, YWHAG]
R-HSA:69473	G2/M DNA damage checkpoint	REACTOME_Pathways_25.05.2022	1.74134e-08	5.0673e-06	1.17968e-17	3.65701e-16	[-1]	Group27	8.51064	8	[CDK1, H2AX, H3-4, SFN, YWHAB, YWHAG, YWHAH, YWHAZ]
R-HSA:69481	G2/M Checkpoints	REACTOME_Pathways_25.05.2022	5.03841e-10	1.7181e-07	1.17968e-17	3.65701e-16	[-1]	Group27	6.58683	11	[CDK1, CDK2, H2AX, H3-4, RPS27A, SFN, UBA52, YWHAB, YWHAG, YWHAH, YWHAZ]
R-HSA:69620	Cell Cycle Checkpoints	REACTOME_Pathways_25.05.2022	1.74567e-08	5.06243e-06	1.17968e-17	3.65701e-16	[-1]	Group27	4.09556	12	[CDK1, CDK2, H2AX, H3-4, PPP2CA, RPS27A, SFN, UBA52, YWHAB, YWHAG, YWHAH, YWHAZ]
R-HSA:75035	Chk1/Chk2(Cds1) mediated inactivation of Cyclin B:Cdk1 complex	REACTOME_Pathways_25.05.2022	1.80681e-11	6.5045e-09	1.17968e-17	3.65701e-16	[-1]	Group27	46.1538	6	[CDK1, SFN, YWHAB, YWHAG, YWHAH, YWHAZ]
R-HSA:9604323	Negative regulation of NOTCH4 signaling	REACTOME_Pathways_25.05.2022	0.00226331	0.0384763	1.17968e-17	3.65701e-16	[-1]	Group27	5.55556	3	[RPS27A, UBA52, YWHAZ]
R-HSA:9614085	FOXO-mediated transcription	REACTOME_Pathways_25.05.2022	0.000275745	0.0168205	1.17968e-17	3.65701e-16	[-1]	Group27	6.15385	4	[SFN, YWHAB, YWHAG, YWHAZ]
R-HSA:9614399	Regulation of localization of FOXO transcription factors	REACTOME_Pathways_25.05.2022	1.6409e-07	4.1843e-05	1.17968e-17	3.65701e-16	[-1]	Group27	36.3636	4	[SFN, YWHAB, YWHAG, YWHAZ]
R-HSA:9659787	Aberrant regulation of mitotic G1/S transition in cancer due to RB1 defects	REACTOME_Pathways_25.05.2022	7.06089e-05	0.00649602	1.17968e-17	3.65701e-16	[-1]	Group27	17.6471	3	[CDK2, CDK4, CDK6]
R-HSA:9661069	Defective binding of RB1 mutants to E2F1,(E2F2, E2F3)	REACTOME_Pathways_25.05.2022	7.06089e-05	0.00649602	1.17968e-17	3.65701e-16	[-1]	Group27	17.6471	3	[CDK2, CDK4, CDK6]
R-HSA:9675126	Diseases of mitotic cell cycle	REACTOME_Pathways_25.05.2022	0.000813914	0.0301148	1.17968e-17	3.65701e-16	[-1]	Group27	7.89474	3	[CDK2, CDK4, CDK6]
R-HSA:9687139	Aberrant regulation of mitotic cell cycle due to RB1 defects	REACTOME_Pathways_25.05.2022	0.000693702	0.0291355	1.17968e-17	3.65701e-16	[-1]	Group27	8.33333	3	[CDK2, CDK4, CDK6]
R-HSA:9705683	SARS-CoV-2-host interactions	REACTOME_Pathways_25.05.2022	5.84538e-07	0.000130352	1.17968e-17	3.65701e-16	[-1]	Group27	4.45545	9	[RPS27A, RPS9, SFN, TPR, UBA52, YWHAB, YWHAG, YWHAH, YWHAZ]
R-HSA:9755779	SARS-CoV-2 targets host intracellular signalling and regulatory pathways	REACTOME_Pathways_25.05.2022	1.82168e-09	5.81116e-07	1.17968e-17	3.65701e-16	[-1]	Group27	41.6667	5	[SFN, YWHAB, YWHAG, YWHAH, YWHAZ]
R-HSA:109704	PI3K Cascade	REACTOME_Pathways_25.05.2022	5.97416e-05	0.00561571	1.63598e-13	3.10836e-12	[-1]	Group28	9.09091	4	[FGFR1, FGFR2, FGFR3, FGFR4]
R-HSA:112399	IRS-mediated signalling	REACTOME_Pathways_25.05.2022	3.07238e-09	9.67799e-07	1.63598e-13	3.10836e-12	[-1]	Group28	14.5833	7	[FGFR1, FGFR2, FGFR3, FGFR4, HRAS, KRAS, NRAS]
R-HSA:1226099	Signaling by FGFR in disease	REACTOME_Pathways_25.05.2022	2.17669e-08	6.22532e-06	1.63598e-13	3.10836e-12	[-1]	Group28	11.1111	7	[FGFR1, FGFR2, FGFR3, FGFR4, HRAS, KRAS, NRAS]
R-HSA:166520	Signaling by NTRKs	REACTOME_Pathways_25.05.2022	1.73227e-08	5.05824e-06	1.63598e-13	3.10836e-12	[-1]	Group28	6.71642	9	[CDK5, FYN, HRAS, KRAS, NRAS, PPP2CA, RAC1, RHOA, YWHAB]
R-HSA:190236	Signaling by FGFR	REACTOME_Pathways_25.05.2022	1.25884e-11	4.5696e-09	1.63598e-13	3.10836e-12	[-1]	Group28	11.4943	10	[FGFR1, FGFR2, FGFR3, FGFR4, HRAS, KRAS, NRAS, PPP2CA, RPS27A, UBA52]
R-HSA:194138	Signaling by VEGF	REACTOME_Pathways_25.05.2022	9.19498e-07	0.000190336	1.63598e-13	3.10836e-12	[-1]	Group28	6.48148	7	[CDC42, FYN, HRAS, KRAS, NRAS, RAC1, RHOA]
R-HSA:199418	Negative regulation of the PI3K/AKT network	REACTOME_Pathways_25.05.2022	7.42704e-08	1.99045e-05	1.63598e-13	3.10836e-12	[-1]	Group28	7.07965	8	[FGFR1, FGFR2, FGFR3, FGFR4, FYN, LCK, PPP2CA, RAC1]
R-HSA:210993	Tie2 Signaling	REACTOME_Pathways_25.05.2022	1.4826e-06	0.000286141	1.63598e-13	3.10836e-12	[-1]	Group28	22.2222	4	[HRAS, KRAS, NRAS, TEK]
R-HSA:2219528	PI3K/AKT Signaling in Cancer	REACTOME_Pathways_25.05.2022	7.11608e-07	0.000152996	1.63598e-13	3.10836e-12	[-1]	Group28	6.73077	7	[FGFR1, FGFR2, FGFR3, FGFR4, FYN, LCK, RAC1]
R-HSA:2219530	Constitutive Signaling by Aberrant PI3K in Cancer	REACTOME_Pathways_25.05.2022	9.79978e-08	2.58714e-05	1.63598e-13	3.10836e-12	[-1]	Group28	8.97436	7	[FGFR1, FGFR2, FGFR3, FGFR4, FYN, LCK, RAC1]
R-HSA:2404192	Signaling by Type 1 Insulin-like Growth Factor 1 Receptor (IGF1R)	REACTOME_Pathways_25.05.2022	7.21801e-09	2.18706e-06	1.63598e-13	3.10836e-12	[-1]	Group28	12.963	7	[FGFR1, FGFR2, FGFR3, FGFR4, HRAS, KRAS, NRAS]
R-HSA:2428924	IGF1R signaling cascade	REACTOME_Pathways_25.05.2022	6.30705e-09	1.92996e-06	1.63598e-13	3.10836e-12	[-1]	Group28	13.2075	7	[FGFR1, FGFR2, FGFR3, FGFR4, HRAS, KRAS, NRAS]
R-HSA:2428928	IRS-related events triggered by IGF1R	REACTOME_Pathways_25.05.2022	5.49557e-09	1.69813e-06	1.63598e-13	3.10836e-12	[-1]	Group28	13.4615	7	[FGFR1, FGFR2, FGFR3, FGFR4, HRAS, KRAS, NRAS]
R-HSA:2871796	FCERI mediated MAPK activation	REACTOME_Pathways_25.05.2022	4.2912e-07	9.99849e-05	1.63598e-13	3.10836e-12	[-1]	Group28	15.625	5	[HRAS, KRAS, LYN, NRAS, RAC1]
R-HSA:375165	NCAM signaling for neurite out-growth	REACTOME_Pathways_25.05.2022	1.33083e-05	0.00174339	1.63598e-13	3.10836e-12	[-1]	Group28	7.93651	5	[FGFR1, FYN, HRAS, KRAS, NRAS]
R-HSA:4420097	VEGFA-VEGFR2 Pathway	REACTOME_Pathways_25.05.2022	5.08557e-07	0.000114425	1.63598e-13	3.10836e-12	[-1]	Group28	7.07071	7	[CDC42, FYN, HRAS, KRAS, NRAS, RAC1, RHOA]
R-HSA:5654687	Downstream signaling of activated FGFR1	REACTOME_Pathways_25.05.2022	1.45288e-05	0.00188874	1.63598e-13	3.10836e-12	[-1]	Group28	12.9032	4	[FGFR1, HRAS, KRAS, NRAS]
R-HSA:5654688	SHC-mediated cascade:FGFR1	REACTOME_Pathways_25.05.2022	2.86774e-06	0.000507591	1.63598e-13	3.10836e-12	[-1]	Group28	19.0476	4	[FGFR1, HRAS, KRAS, NRAS]
R-HSA:5654693	FRS-mediated FGFR1 signaling	REACTOME_Pathways_25.05.2022	4.21161e-06	0.000711763	1.63598e-13	3.10836e-12	[-1]	Group28	17.3913	4	[FGFR1, HRAS, KRAS, NRAS]
R-HSA:5654696	Downstream signaling of activated FGFR2	REACTOME_Pathways_25.05.2022	1.2701e-05	0.00170194	1.63598e-13	3.10836e-12	[-1]	Group28	13.3333	4	[FGFR2, HRAS, KRAS, NRAS]
R-HSA:5654699	SHC-mediated cascade:FGFR2	REACTOME_Pathways_25.05.2022	4.21161e-06	0.000711763	1.63598e-13	3.10836e-12	[-1]	Group28	17.3913	4	[FGFR2, HRAS, KRAS, NRAS]
R-HSA:5654700	FRS-mediated FGFR2 signaling	REACTOME_Pathways_25.05.2022	5.97221e-06	0.000925692	1.63598e-13	3.10836e-12	[-1]	Group28	16	4	[FGFR2, HRAS, KRAS, NRAS]
R-HSA:5654704	SHC-mediated cascade:FGFR3	REACTOME_Pathways_25.05.2022	1.4826e-06	0.000286141	1.63598e-13	3.10836e-12	[-1]	Group28	22.2222	4	[FGFR3, HRAS, KRAS, NRAS]
R-HSA:5654706	FRS-mediated FGFR3 signaling	REACTOME_Pathways_25.05.2022	2.33012e-06	0.000421752	1.63598e-13	3.10836e-12	[-1]	Group28	20	4	[FGFR3, HRAS, KRAS, NRAS]
R-HSA:5654708	Downstream signaling of activated FGFR3	REACTOME_Pathways_25.05.2022	5.97221e-06	0.000925692	1.63598e-13	3.10836e-12	[-1]	Group28	16	4	[FGFR3, HRAS, KRAS, NRAS]
R-HSA:5654712	FRS-mediated FGFR4 signaling	REACTOME_Pathways_25.05.2022	3.49206e-06	0.000600635	1.63598e-13	3.10836e-12	[-1]	Group28	18.1818	4	[FGFR4, HRAS, KRAS, NRAS]
R-HSA:5654716	Downstream signaling of activated FGFR4	REACTOME_Pathways_25.05.2022	8.22445e-06	0.00120077	1.63598e-13	3.10836e-12	[-1]	Group28	14.8148	4	[FGFR4, HRAS, KRAS, NRAS]
R-HSA:5654719	SHC-mediated cascade:FGFR4	REACTOME_Pathways_25.05.2022	2.33012e-06	0.000421752	1.63598e-13	3.10836e-12	[-1]	Group28	20	4	[FGFR4, HRAS, KRAS, NRAS]
R-HSA:5655253	Signaling by FGFR2 in disease	REACTOME_Pathways_25.05.2022	5.45116e-05	0.00523311	1.63598e-13	3.10836e-12	[-1]	Group28	9.30233	4	[FGFR2, HRAS, KRAS, NRAS]
R-HSA:5655291	Signaling by FGFR4 in disease	REACTOME_Pathways_25.05.2022	1.6409e-07	4.1843e-05	1.63598e-13	3.10836e-12	[-1]	Group28	36.3636	4	[FGFR4, HRAS, KRAS, NRAS]
R-HSA:5655302	Signaling by FGFR1 in disease	REACTOME_Pathways_25.05.2022	3.32128e-05	0.0036202	1.63598e-13	3.10836e-12	[-1]	Group28	10.5263	4	[FGFR1, HRAS, KRAS, NRAS]
R-HSA:5655332	Signaling by FGFR3 in disease	REACTOME_Pathways_25.05.2022	3.49206e-06	0.000600635	1.63598e-13	3.10836e-12	[-1]	Group28	18.1818	4	[FGFR3, HRAS, KRAS, NRAS]
R-HSA:5673001	RAF/MAP kinase cascade	REACTOME_Pathways_25.05.2022	9.28905e-10	3.08396e-07	1.63598e-13	3.10836e-12	[-1]	Group28	4.64286	13	[FGFR1, FGFR2, FGFR3, FGFR4, FYN, HRAS, KRAS, NRAS, PPP2CA, RPS27A, TEK, UBA52, YWHAB]
R-HSA:5683057	MAPK family signaling cascades	REACTOME_Pathways_25.05.2022	2.74512e-13	1.02118e-10	1.63598e-13	3.10836e-12	[-1]	Group28	5.23077	17	[CDC42, CDK1, FGFR1, FGFR2, FGFR3, FGFR4, FYN, HRAS, KRAS, NRAS, PPP2CA, RAC1, RPS27A, SEPTIN7, TEK, UBA52, YWHAB]
R-HSA:5684996	MAPK1/MAPK3 signaling	REACTOME_Pathways_25.05.2022	9.9146e-11	3.50977e-08	1.63598e-13	3.10836e-12	[-1]	Group28	4.8951	14	[CDK1, FGFR1, FGFR2, FGFR3, FGFR4, FYN, HRAS, KRAS, NRAS, PPP2CA, RPS27A, TEK, UBA52, YWHAB]
R-HSA:6811558	PI5P, PP2A and IER3 Regulate PI3K/AKT Signaling	REACTOME_Pathways_25.05.2022	4.49962e-08	1.2374e-05	1.63598e-13	3.10836e-12	[-1]	Group28	7.54717	8	[FGFR1, FGFR2, FGFR3, FGFR4, FYN, LCK, PPP2CA, RAC1]
R-HSA:74751	Insulin receptor signalling cascade	REACTOME_Pathways_25.05.2022	7.21801e-09	2.18706e-06	1.63598e-13	3.10836e-12	[-1]	Group28	12.963	7	[FGFR1, FGFR2, FGFR3, FGFR4, HRAS, KRAS, NRAS]
R-HSA:74752	Signaling by Insulin receptor	REACTOME_Pathways_25.05.2022	3.90684e-09	1.22284e-06	1.63598e-13	3.10836e-12	[-1]	Group28	10.2564	8	[ATP6V1B2, FGFR1, FGFR2, FGFR3, FGFR4, HRAS, KRAS, NRAS]
R-HSA:8848021	Signaling by PTK6	REACTOME_Pathways_25.05.2022	4.33241e-12	1.58566e-09	1.63598e-13	3.10836e-12	[-1]	Group28	16.6667	9	[CDK2, CDK4, HRAS, KRAS, NRAS, RAC1, RHOA, RPS27A, UBA52]
R-HSA:8849471	PTK6 Regulates RHO GTPases, RAS GTPase and MAP kinases	REACTOME_Pathways_25.05.2022	4.56974e-09	1.42119e-06	1.63598e-13	3.10836e-12	[-1]	Group28	35.7143	5	[HRAS, KRAS, NRAS, RAC1, RHOA]
R-HSA:9006927	Signaling by Non-Receptor Tyrosine Kinases	REACTOME_Pathways_25.05.2022	4.33241e-12	1.58566e-09	1.63598e-13	3.10836e-12	[-1]	Group28	16.6667	9	[CDK2, CDK4, HRAS, KRAS, NRAS, RAC1, RHOA, RPS27A, UBA52]
R-HSA:109606	Intrinsic Pathway for Apoptosis	REACTOME_Pathways_25.05.2022	6.79048e-06	0.00101857	2.78916e-15	6.41507e-14	[-1]	Group29	9.09091	5	[SFN, YWHAB, YWHAG, YWHAH, YWHAZ]
R-HSA:111447	Activation of BAD and translocation to mitochondria	REACTOME_Pathways_25.05.2022	6.82847e-09	2.08268e-06	2.78916e-15	6.41507e-14	[-1]	Group29	33.3333	5	[SFN, YWHAB, YWHAG, YWHAH, YWHAZ]
R-HSA:114452	Activation of BH3-only proteins	REACTOME_Pathways_25.05.2022	3.05999e-07	7.34397e-05	2.78916e-15	6.41507e-14	[-1]	Group29	16.6667	5	[SFN, YWHAB, YWHAG, YWHAH, YWHAZ]
R-HSA:166520	Signaling by NTRKs	REACTOME_Pathways_25.05.2022	1.73227e-08	5.05824e-06	2.78916e-15	6.41507e-14	[-1]	Group29	6.71642	9	[CDK5, FYN, HRAS, KRAS, NRAS, PPP2CA, RAC1, RHOA, YWHAB]
R-HSA:187037	Signaling by NTRK1 (TRKA)	REACTOME_Pathways_25.05.2022	1.40573e-06	0.000274118	2.78916e-15	6.41507e-14	[-1]	Group29	6.08696	7	[CDK5, HRAS, KRAS, NRAS, PPP2CA, RHOA, YWHAB]
R-HSA:187687	Signalling to ERKs	REACTOME_Pathways_25.05.2022	2.11776e-05	0.00256249	2.78916e-15	6.41507e-14	[-1]	Group29	11.7647	4	[HRAS, KRAS, NRAS, YWHAB]
R-HSA:5628897	TP53 Regulates Metabolic Genes	REACTOME_Pathways_25.05.2022	6.38546e-05	0.00593848	2.78916e-15	6.41507e-14	[-1]	Group29	5.74713	5	[SFN, YWHAB, YWHAG, YWHAH, YWHAZ]
R-HSA:5673000	RAF activation	REACTOME_Pathways_25.05.2022	7.91176e-07	0.000168521	2.78916e-15	6.41507e-14	[-1]	Group29	13.8889	5	[HRAS, KRAS, NRAS, PPP2CA, YWHAB]
R-HSA:5674135	MAP2K and MAPK activation	REACTOME_Pathways_25.05.2022	4.08179e-05	0.00420424	2.78916e-15	6.41507e-14	[-1]	Group29	10	4	[HRAS, KRAS, NRAS, YWHAB]
R-HSA:5675221	Negative regulation of MAPK pathway	REACTOME_Pathways_25.05.2022	1.37129e-09	4.47041e-07	2.78916e-15	6.41507e-14	[-1]	Group29	16.2791	7	[HRAS, KRAS, NRAS, PPP2CA, RPS27A, UBA52, YWHAB]
R-HSA:6802946	Signaling by moderate kinase activity BRAF mutants	REACTOME_Pathways_25.05.2022	7.76306e-05	0.00683149	2.78916e-15	6.41507e-14	[-1]	Group29	8.51064	4	[HRAS, KRAS, NRAS, YWHAB]
R-HSA:6802948	Signaling by high-kinase activity BRAF mutants	REACTOME_Pathways_25.05.2022	2.67008e-05	0.00304389	2.78916e-15	6.41507e-14	[-1]	Group29	11.1111	4	[HRAS, KRAS, NRAS, YWHAB]
R-HSA:6802949	Signaling by RAS mutants	REACTOME_Pathways_25.05.2022	7.76306e-05	0.00683149	2.78916e-15	6.41507e-14	[-1]	Group29	8.51064	4	[HRAS, KRAS, NRAS, YWHAB]
R-HSA:6802952	Signaling by BRAF and RAF1 fusions	REACTOME_Pathways_25.05.2022	0.000309881	0.0176632	2.78916e-15	6.41507e-14	[-1]	Group29	5.97015	4	[HRAS, KRAS, NRAS, YWHAB]
R-HSA:6802955	Paradoxical activation of RAF signaling by kinase inactive BRAF	REACTOME_Pathways_25.05.2022	7.76306e-05	0.00683149	2.78916e-15	6.41507e-14	[-1]	Group29	8.51064	4	[HRAS, KRAS, NRAS, YWHAB]
R-HSA:6802957	Oncogenic MAPK signaling	REACTOME_Pathways_25.05.2022	0.000732786	0.0293114	2.78916e-15	6.41507e-14	[-1]	Group29	4.7619	4	[HRAS, KRAS, NRAS, YWHAB]
R-HSA:69620	Cell Cycle Checkpoints	REACTOME_Pathways_25.05.2022	1.74567e-08	5.06243e-06	2.78916e-15	6.41507e-14	[-1]	Group29	4.09556	12	[CDK1, CDK2, H2AX, H3-4, PPP2CA, RPS27A, SFN, UBA52, YWHAB, YWHAG, YWHAH, YWHAZ]
R-HSA:75035	Chk1/Chk2(Cds1) mediated inactivation of Cyclin B:Cdk1 complex	REACTOME_Pathways_25.05.2022	1.80681e-11	6.5045e-09	2.78916e-15	6.41507e-14	[-1]	Group29	46.1538	6	[CDK1, SFN, YWHAB, YWHAG, YWHAH, YWHAZ]
R-HSA:8848021	Signaling by PTK6	REACTOME_Pathways_25.05.2022	4.33241e-12	1.58566e-09	2.78916e-15	6.41507e-14	[-1]	Group29	16.6667	9	[CDK2, CDK4, HRAS, KRAS, NRAS, RAC1, RHOA, RPS27A, UBA52]
R-HSA:9006927	Signaling by Non-Receptor Tyrosine Kinases	REACTOME_Pathways_25.05.2022	4.33241e-12	1.58566e-09	2.78916e-15	6.41507e-14	[-1]	Group29	16.6667	9	[CDK2, CDK4, HRAS, KRAS, NRAS, RAC1, RHOA, RPS27A, UBA52]
R-HSA:9649948	Signaling downstream of RAS mutants	REACTOME_Pathways_25.05.2022	7.76306e-05	0.00683149	2.78916e-15	6.41507e-14	[-1]	Group29	8.51064	4	[HRAS, KRAS, NRAS, YWHAB]
R-HSA:9656223	Signaling by RAF1 mutants	REACTOME_Pathways_25.05.2022	5.45116e-05	0.00523311	2.78916e-15	6.41507e-14	[-1]	Group29	9.30233	4	[HRAS, KRAS, NRAS, YWHAB]
R-HSA:9755779	SARS-CoV-2 targets host intracellular signalling and regulatory pathways	REACTOME_Pathways_25.05.2022	1.82168e-09	5.81116e-07	2.78916e-15	6.41507e-14	[-1]	Group29	41.6667	5	[SFN, YWHAB, YWHAG, YWHAH, YWHAZ]
R-HSA:114604	GPVI-mediated activation cascade	REACTOME_Pathways_25.05.2022	1.56894e-08	4.61269e-06	6.50036e-16	1.69009e-14	[-1]	Group30	17.1429	6	[CDC42, FYN, LCK, LYN, RAC1, RHOA]
R-HSA:164944	Nef and signal transduction	REACTOME_Pathways_25.05.2022	3.51964e-08	9.8198e-06	6.50036e-16	1.69009e-14	[-1]	Group30	50	4	[FYN, HCK, LCK, RAC1]
R-HSA:164952	The role of Nef in HIV-1 replication and disease pathogenesis	REACTOME_Pathways_25.05.2022	9.55974e-06	0.00134792	6.50036e-16	1.69009e-14	[-1]	Group30	14.2857	4	[FYN, HCK, LCK, RAC1]
R-HSA:166520	Signaling by NTRKs	REACTOME_Pathways_25.05.2022	1.73227e-08	5.05824e-06	6.50036e-16	1.69009e-14	[-1]	Group30	6.71642	9	[CDK5, FYN, HRAS, KRAS, NRAS, PPP2CA, RAC1, RHOA, YWHAB]
R-HSA:193704	p75 NTR receptor-mediated signalling	REACTOME_Pathways_25.05.2022	0.00125454	0.032618	6.50036e-16	1.69009e-14	[-1]	Group30	4.12371	4	[RAC1, RHOA, RPS27A, UBA52]
R-HSA:194138	Signaling by VEGF	REACTOME_Pathways_25.05.2022	9.19498e-07	0.000190336	6.50036e-16	1.69009e-14	[-1]	Group30	6.48148	7	[CDC42, FYN, HRAS, KRAS, NRAS, RAC1, RHOA]
R-HSA:2029480	Fcgamma receptor (FCGR) dependent phagocytosis	REACTOME_Pathways_25.05.2022	1.93155e-07	4.84818e-05	6.50036e-16	1.69009e-14	[-1]	Group30	8.13953	7	[CDC42, FGR, FYN, HCK, LYN, RAC1, YES1]
R-HSA:2029481	FCGR activation	REACTOME_Pathways_25.05.2022	1.82168e-09	5.81116e-07	6.50036e-16	1.69009e-14	[-1]	Group30	41.6667	5	[FGR, FYN, HCK, LYN, YES1]
R-HSA:2172127	DAP12 interactions	REACTOME_Pathways_25.05.2022	7.57295e-08	2.02198e-05	6.50036e-16	1.69009e-14	[-1]	Group30	13.3333	6	[FYN, HRAS, KRAS, LCK, NRAS, RAC1]
R-HSA:2424491	DAP12 signaling	REACTOME_Pathways_25.05.2022	5.85205e-09	1.79658e-06	6.50036e-16	1.69009e-14	[-1]	Group30	20	6	[FYN, HRAS, KRAS, LCK, NRAS, RAC1]
R-HSA:2682334	EPH-Ephrin signaling	REACTOME_Pathways_25.05.2022	3.07598e-07	7.3516e-05	6.50036e-16	1.69009e-14	[-1]	Group30	7.6087	7	[CDC42, FYN, HRAS, LYN, RAC1, RHOA, YES1]
R-HSA:2871796	FCERI mediated MAPK activation	REACTOME_Pathways_25.05.2022	4.2912e-07	9.99849e-05	6.50036e-16	1.69009e-14	[-1]	Group30	15.625	5	[HRAS, KRAS, LYN, NRAS, RAC1]
R-HSA:373752	Netrin-1 signaling	REACTOME_Pathways_25.05.2022	0.00181353	0.0362707	6.50036e-16	1.69009e-14	[-1]	Group30	6	3	[CDC42, FYN, RAC1]
R-HSA:373755	Semaphorin interactions	REACTOME_Pathways_25.05.2022	0.000275745	0.0168205	6.50036e-16	1.69009e-14	[-1]	Group30	6.15385	4	[CDK5, FYN, RAC1, RHOA]
R-HSA:3858494	Beta-catenin independent WNT signaling	REACTOME_Pathways_25.05.2022	7.61967e-05	0.0067815	6.50036e-16	1.69009e-14	[-1]	Group30	4.10959	6	[KRAS, RAC1, RAC3, RHOA, RPS27A, UBA52]
R-HSA:388841	Costimulation by the CD28 family	REACTOME_Pathways_25.05.2022	4.14585e-08	1.14426e-05	6.50036e-16	1.69009e-14	[-1]	Group30	10.1449	7	[CDC42, FYN, LCK, LYN, PPP2CA, RAC1, YES1]
R-HSA:389356	CD28 co-stimulation	REACTOME_Pathways_25.05.2022	1.07893e-08	3.2152e-06	6.50036e-16	1.69009e-14	[-1]	Group30	18.1818	6	[CDC42, FYN, LCK, LYN, RAC1, YES1]
R-HSA:389359	CD28 dependent Vav1 pathway	REACTOME_Pathways_25.05.2022	2.45225e-07	5.98348e-05	6.50036e-16	1.69009e-14	[-1]	Group30	33.3333	4	[CDC42, FYN, LCK, RAC1]
R-HSA:3928662	EPHB-mediated forward signaling	REACTOME_Pathways_25.05.2022	1.15257e-09	3.79197e-07	6.50036e-16	1.69009e-14	[-1]	Group30	16.6667	7	[CDC42, FYN, HRAS, LYN, RAC1, RHOA, YES1]
R-HSA:3928663	EPHA-mediated growth cone collapse	REACTOME_Pathways_25.05.2022	1.2701e-05	0.00170194	6.50036e-16	1.69009e-14	[-1]	Group30	13.3333	4	[FYN, LYN, RHOA, YES1]
R-HSA:3928665	EPH-ephrin mediated repulsion of cells	REACTOME_Pathways_25.05.2022	0.000107171	0.00868085	6.50036e-16	1.69009e-14	[-1]	Group30	7.84314	4	[FYN, LYN, RAC1, YES1]
R-HSA:4086400	PCP/CE pathway	REACTOME_Pathways_25.05.2022	8.33852e-05	0.00717113	6.50036e-16	1.69009e-14	[-1]	Group30	5.43478	5	[RAC1, RAC3, RHOA, RPS27A, UBA52]
R-HSA:418885	DCC mediated attractive signaling	REACTOME_Pathways_25.05.2022	3.81963e-05	0.00401061	6.50036e-16	1.69009e-14	[-1]	Group30	21.4286	3	[CDC42, FYN, RAC1]
R-HSA:4420097	VEGFA-VEGFR2 Pathway	REACTOME_Pathways_25.05.2022	5.08557e-07	0.000114425	6.50036e-16	1.69009e-14	[-1]	Group30	7.07071	7	[CDC42, FYN, HRAS, KRAS, NRAS, RAC1, RHOA]
R-HSA:5625970	RHO GTPases activate KTN1	REACTOME_Pathways_25.05.2022	1.74975e-05	0.00220468	6.50036e-16	1.69009e-14	[-1]	Group30	27.2727	3	[CDC42, RAC1, RHOA]
R-HSA:5626467	RHO GTPases activate IQGAPs	REACTOME_Pathways_25.05.2022	4.2912e-07	9.99849e-05	6.50036e-16	1.69009e-14	[-1]	Group30	15.625	5	[CDC42, RAC1, TUBA3C, TUBA3D, TUBA3E]
R-HSA:5663220	RHO GTPases Activate Formins	REACTOME_Pathways_25.05.2022	5.22445e-06	0.000841136	6.50036e-16	1.69009e-14	[-1]	Group30	5	7	[CDC42, PPP2CA, RAC1, RHOA, TUBA3C, TUBA3D, TUBA3E]
R-HSA:5687128	MAPK6/MAPK4 signaling	REACTOME_Pathways_25.05.2022	4.55471e-06	0.000760637	6.50036e-16	1.69009e-14	[-1]	Group30	6.74157	6	[CDC42, CDK1, RAC1, RPS27A, SEPTIN7, UBA52]
R-HSA:8849471	PTK6 Regulates RHO GTPases, RAS GTPase and MAP kinases	REACTOME_Pathways_25.05.2022	4.56974e-09	1.42119e-06	6.50036e-16	1.69009e-14	[-1]	Group30	35.7143	5	[HRAS, KRAS, NRAS, RAC1, RHOA]
R-HSA:9006115	Signaling by NTRK2 (TRKB)	REACTOME_Pathways_25.05.2022	1.7797e-09	5.69503e-07	6.50036e-16	1.69009e-14	[-1]	Group30	24	6	[CDK5, FYN, HRAS, KRAS, NRAS, RAC1]
R-HSA:9659787	Aberrant regulation of mitotic G1/S transition in cancer due to RB1 defects	REACTOME_Pathways_25.05.2022	7.06089e-05	0.00649602	6.50036e-16	1.69009e-14	[-1]	Group30	17.6471	3	[CDK2, CDK4, CDK6]
R-HSA:9661069	Defective binding of RB1 mutants to E2F1,(E2F2, E2F3)	REACTOME_Pathways_25.05.2022	7.06089e-05	0.00649602	6.50036e-16	1.69009e-14	[-1]	Group30	17.6471	3	[CDK2, CDK4, CDK6]
R-HSA:9664323	FCGR3A-mediated IL10 synthesis	REACTOME_Pathways_25.05.2022	1.36002e-06	0.000266563	6.50036e-16	1.69009e-14	[-1]	Group30	12.5	5	[FGR, FYN, HCK, LYN, YES1]
R-HSA:9664407	Parasite infection	REACTOME_Pathways_25.05.2022	1.36339e-08	4.03563e-06	6.50036e-16	1.69009e-14	[-1]	Group30	11.8644	7	[CDC42, FGR, FYN, HCK, LYN, RAC1, YES1]
R-HSA:9664417	Leishmania phagocytosis	REACTOME_Pathways_25.05.2022	1.36339e-08	4.03563e-06	6.50036e-16	1.69009e-14	[-1]	Group30	11.8644	7	[CDC42, FGR, FYN, HCK, LYN, RAC1, YES1]
R-HSA:9664422	FCGR3A-mediated phagocytosis	REACTOME_Pathways_25.05.2022	1.36339e-08	4.03563e-06	6.50036e-16	1.69009e-14	[-1]	Group30	11.8644	7	[CDC42, FGR, FYN, HCK, LYN, RAC1, YES1]
R-HSA:9674555	Signaling by CSF3 (G-CSF)	REACTOME_Pathways_25.05.2022	3.05999e-07	7.34397e-05	6.50036e-16	1.69009e-14	[-1]	Group30	16.6667	5	[HCK, KRAS, LYN, RPS27A, UBA52]
R-HSA:9675126	Diseases of mitotic cell cycle	REACTOME_Pathways_25.05.2022	0.000813914	0.0301148	6.50036e-16	1.69009e-14	[-1]	Group30	7.89474	3	[CDK2, CDK4, CDK6]
R-HSA:9687139	Aberrant regulation of mitotic cell cycle due to RB1 defects	REACTOME_Pathways_25.05.2022	0.000693702	0.0291355	6.50036e-16	1.69009e-14	[-1]	Group30	8.33333	3	[CDK2, CDK4, CDK6]
R-HSA:9705462	Inactivation of CSF3 (G-CSF) signaling	REACTOME_Pathways_25.05.2022	5.97221e-06	0.000925692	6.50036e-16	1.69009e-14	[-1]	Group30	16	4	[HCK, LYN, RPS27A, UBA52]
R-HSA:109704	PI3K Cascade	REACTOME_Pathways_25.05.2022	5.97416e-05	0.00561571	1.37512e-14	3.02525e-13	[-1]	Group31	9.09091	4	[FGFR1, FGFR2, FGFR3, FGFR4]
R-HSA:112399	IRS-mediated signalling	REACTOME_Pathways_25.05.2022	3.07238e-09	9.67799e-07	1.37512e-14	3.02525e-13	[-1]	Group31	14.5833	7	[FGFR1, FGFR2, FGFR3, FGFR4, HRAS, KRAS, NRAS]
R-HSA:1168372	Downstream signaling events of B Cell Receptor (BCR)	REACTOME_Pathways_25.05.2022	5.09445e-05	0.0050435	1.37512e-14	3.02525e-13	[-1]	Group31	6.0241	5	[HRAS, KRAS, NRAS, RPS27A, UBA52]
R-HSA:1226099	Signaling by FGFR in disease	REACTOME_Pathways_25.05.2022	2.17669e-08	6.22532e-06	1.37512e-14	3.02525e-13	[-1]	Group31	11.1111	7	[FGFR1, FGFR2, FGFR3, FGFR4, HRAS, KRAS, NRAS]
R-HSA:1227986	Signaling by ERBB2	REACTOME_Pathways_25.05.2022	9.99062e-11	3.52669e-08	1.37512e-14	3.02525e-13	[-1]	Group31	16	8	[FYN, HRAS, KRAS, NRAS, RHOA, RPS27A, UBA52, YES1]
R-HSA:1236382	Constitutive Signaling by Ligand-Responsive EGFR Cancer Variants	REACTOME_Pathways_25.05.2022	2.60397e-08	7.4213e-06	1.37512e-14	3.02525e-13	[-1]	Group31	26.3158	5	[HRAS, KRAS, NRAS, RPS27A, UBA52]
R-HSA:1236394	Signaling by ERBB4	REACTOME_Pathways_25.05.2022	8.84255e-06	0.00127333	1.37512e-14	3.02525e-13	[-1]	Group31	8.62069	5	[HRAS, KRAS, NRAS, RPS27A, UBA52]
R-HSA:1643713	Signaling by EGFR in Cancer	REACTOME_Pathways_25.05.2022	1.16283e-07	3.02337e-05	1.37512e-14	3.02525e-13	[-1]	Group31	20	5	[HRAS, KRAS, NRAS, RPS27A, UBA52]
R-HSA:166520	Signaling by NTRKs	REACTOME_Pathways_25.05.2022	1.73227e-08	5.05824e-06	1.37512e-14	3.02525e-13	[-1]	Group31	6.71642	9	[CDK5, FYN, HRAS, KRAS, NRAS, PPP2CA, RAC1, RHOA, YWHAB]
R-HSA:177929	Signaling by EGFR	REACTOME_Pathways_25.05.2022	1.44904e-07	3.70953e-05	1.37512e-14	3.02525e-13	[-1]	Group31	12	6	[CDC42, HRAS, KRAS, NRAS, RPS27A, UBA52]
R-HSA:187037	Signaling by NTRK1 (TRKA)	REACTOME_Pathways_25.05.2022	1.40573e-06	0.000274118	1.37512e-14	3.02525e-13	[-1]	Group31	6.08696	7	[CDK5, HRAS, KRAS, NRAS, PPP2CA, RHOA, YWHAB]
R-HSA:187687	Signalling to ERKs	REACTOME_Pathways_25.05.2022	2.11776e-05	0.00256249	1.37512e-14	3.02525e-13	[-1]	Group31	11.7647	4	[HRAS, KRAS, NRAS, YWHAB]
R-HSA:190236	Signaling by FGFR	REACTOME_Pathways_25.05.2022	1.25884e-11	4.5696e-09	1.37512e-14	3.02525e-13	[-1]	Group31	11.4943	10	[FGFR1, FGFR2, FGFR3, FGFR4, HRAS, KRAS, NRAS, PPP2CA, RPS27A, UBA52]
R-HSA:199418	Negative regulation of the PI3K/AKT network	REACTOME_Pathways_25.05.2022	7.42704e-08	1.99045e-05	1.37512e-14	3.02525e-13	[-1]	Group31	7.07965	8	[FGFR1, FGFR2, FGFR3, FGFR4, FYN, LCK, PPP2CA, RAC1]
R-HSA:202733	Cell surface interactions at the vascular wall	REACTOME_Pathways_25.05.2022	3.29989e-07	7.82075e-05	1.37512e-14	3.02525e-13	[-1]	Group31	5.83942	8	[FYN, HRAS, KRAS, LCK, LYN, NRAS, TEK, YES1]
R-HSA:210993	Tie2 Signaling	REACTOME_Pathways_25.05.2022	1.4826e-06	0.000286141	1.37512e-14	3.02525e-13	[-1]	Group31	22.2222	4	[HRAS, KRAS, NRAS, TEK]
R-HSA:2219528	PI3K/AKT Signaling in Cancer	REACTOME_Pathways_25.05.2022	7.11608e-07	0.000152996	1.37512e-14	3.02525e-13	[-1]	Group31	6.73077	7	[FGFR1, FGFR2, FGFR3, FGFR4, FYN, LCK, RAC1]
R-HSA:2219530	Constitutive Signaling by Aberrant PI3K in Cancer	REACTOME_Pathways_25.05.2022	9.79978e-08	2.58714e-05	1.37512e-14	3.02525e-13	[-1]	Group31	8.97436	7	[FGFR1, FGFR2, FGFR3, FGFR4, FYN, LCK, RAC1]
R-HSA:2404192	Signaling by Type 1 Insulin-like Growth Factor 1 Receptor (IGF1R)	REACTOME_Pathways_25.05.2022	7.21801e-09	2.18706e-06	1.37512e-14	3.02525e-13	[-1]	Group31	12.963	7	[FGFR1, FGFR2, FGFR3, FGFR4, HRAS, KRAS, NRAS]
R-HSA:2428924	IGF1R signaling cascade	REACTOME_Pathways_25.05.2022	6.30705e-09	1.92996e-06	1.37512e-14	3.02525e-13	[-1]	Group31	13.2075	7	[FGFR1, FGFR2, FGFR3, FGFR4, HRAS, KRAS, NRAS]
R-HSA:2428928	IRS-related events triggered by IGF1R	REACTOME_Pathways_25.05.2022	5.49557e-09	1.69813e-06	1.37512e-14	3.02525e-13	[-1]	Group31	13.4615	7	[FGFR1, FGFR2, FGFR3, FGFR4, HRAS, KRAS, NRAS]
R-HSA:2454202	Fc epsilon receptor (FCERI) signaling	REACTOME_Pathways_25.05.2022	2.78386e-07	6.76478e-05	1.37512e-14	3.02525e-13	[-1]	Group31	5.97015	8	[FYN, HRAS, KRAS, LYN, NRAS, RAC1, RPS27A, UBA52]
R-HSA:375165	NCAM signaling for neurite out-growth	REACTOME_Pathways_25.05.2022	1.33083e-05	0.00174339	1.37512e-14	3.02525e-13	[-1]	Group31	7.93651	5	[FGFR1, FYN, HRAS, KRAS, NRAS]
R-HSA:5621481	C-type lectin receptors (CLRs)	REACTOME_Pathways_25.05.2022	5.73729e-06	0.000900755	1.37512e-14	3.02525e-13	[-1]	Group31	4.92958	7	[FYN, HRAS, KRAS, LYN, NRAS, RPS27A, UBA52]
R-HSA:5637815	Signaling by Ligand-Responsive EGFR Variants in Cancer	REACTOME_Pathways_25.05.2022	2.60397e-08	7.4213e-06	1.37512e-14	3.02525e-13	[-1]	Group31	26.3158	5	[HRAS, KRAS, NRAS, RPS27A, UBA52]
R-HSA:5654687	Downstream signaling of activated FGFR1	REACTOME_Pathways_25.05.2022	1.45288e-05	0.00188874	1.37512e-14	3.02525e-13	[-1]	Group31	12.9032	4	[FGFR1, HRAS, KRAS, NRAS]
R-HSA:5654688	SHC-mediated cascade:FGFR1	REACTOME_Pathways_25.05.2022	2.86774e-06	0.000507591	1.37512e-14	3.02525e-13	[-1]	Group31	19.0476	4	[FGFR1, HRAS, KRAS, NRAS]
R-HSA:5654693	FRS-mediated FGFR1 signaling	REACTOME_Pathways_25.05.2022	4.21161e-06	0.000711763	1.37512e-14	3.02525e-13	[-1]	Group31	17.3913	4	[FGFR1, HRAS, KRAS, NRAS]
R-HSA:5654696	Downstream signaling of activated FGFR2	REACTOME_Pathways_25.05.2022	1.2701e-05	0.00170194	1.37512e-14	3.02525e-13	[-1]	Group31	13.3333	4	[FGFR2, HRAS, KRAS, NRAS]
R-HSA:5654699	SHC-mediated cascade:FGFR2	REACTOME_Pathways_25.05.2022	4.21161e-06	0.000711763	1.37512e-14	3.02525e-13	[-1]	Group31	17.3913	4	[FGFR2, HRAS, KRAS, NRAS]
R-HSA:5654700	FRS-mediated FGFR2 signaling	REACTOME_Pathways_25.05.2022	5.97221e-06	0.000925692	1.37512e-14	3.02525e-13	[-1]	Group31	16	4	[FGFR2, HRAS, KRAS, NRAS]
R-HSA:5654704	SHC-mediated cascade:FGFR3	REACTOME_Pathways_25.05.2022	1.4826e-06	0.000286141	1.37512e-14	3.02525e-13	[-1]	Group31	22.2222	4	[FGFR3, HRAS, KRAS, NRAS]
R-HSA:5654706	FRS-mediated FGFR3 signaling	REACTOME_Pathways_25.05.2022	2.33012e-06	0.000421752	1.37512e-14	3.02525e-13	[-1]	Group31	20	4	[FGFR3, HRAS, KRAS, NRAS]
R-HSA:5654708	Downstream signaling of activated FGFR3	REACTOME_Pathways_25.05.2022	5.97221e-06	0.000925692	1.37512e-14	3.02525e-13	[-1]	Group31	16	4	[FGFR3, HRAS, KRAS, NRAS]
R-HSA:5654712	FRS-mediated FGFR4 signaling	REACTOME_Pathways_25.05.2022	3.49206e-06	0.000600635	1.37512e-14	3.02525e-13	[-1]	Group31	18.1818	4	[FGFR4, HRAS, KRAS, NRAS]
R-HSA:5654716	Downstream signaling of activated FGFR4	REACTOME_Pathways_25.05.2022	8.22445e-06	0.00120077	1.37512e-14	3.02525e-13	[-1]	Group31	14.8148	4	[FGFR4, HRAS, KRAS, NRAS]
R-HSA:5654719	SHC-mediated cascade:FGFR4	REACTOME_Pathways_25.05.2022	2.33012e-06	0.000421752	1.37512e-14	3.02525e-13	[-1]	Group31	20	4	[FGFR4, HRAS, KRAS, NRAS]
R-HSA:5654726	Negative regulation of FGFR1 signaling	REACTOME_Pathways_25.05.2022	1.87553e-05	0.00232566	1.37512e-14	3.02525e-13	[-1]	Group31	12.1212	4	[FGFR1, PPP2CA, RPS27A, UBA52]
R-HSA:5654727	Negative regulation of FGFR2 signaling	REACTOME_Pathways_25.05.2022	2.11776e-05	0.00256249	1.37512e-14	3.02525e-13	[-1]	Group31	11.7647	4	[FGFR2, PPP2CA, RPS27A, UBA52]
R-HSA:5654732	Negative regulation of FGFR3 signaling	REACTOME_Pathways_25.05.2022	1.10483e-05	0.00152467	1.37512e-14	3.02525e-13	[-1]	Group31	13.7931	4	[FGFR3, PPP2CA, RPS27A, UBA52]
R-HSA:5654733	Negative regulation of FGFR4 signaling	REACTOME_Pathways_25.05.2022	1.45288e-05	0.00188874	1.37512e-14	3.02525e-13	[-1]	Group31	12.9032	4	[FGFR4, PPP2CA, RPS27A, UBA52]
R-HSA:5654736	Signaling by FGFR1	REACTOME_Pathways_25.05.2022	4.13536e-09	1.29023e-06	1.37512e-14	3.02525e-13	[-1]	Group31	14	7	[FGFR1, HRAS, KRAS, NRAS, PPP2CA, RPS27A, UBA52]
R-HSA:5654738	Signaling by FGFR2	REACTOME_Pathways_25.05.2022	6.16357e-08	1.67649e-05	1.37512e-14	3.02525e-13	[-1]	Group31	9.58904	7	[FGFR2, HRAS, KRAS, NRAS, PPP2CA, RPS27A, UBA52]
R-HSA:5654741	Signaling by FGFR3	REACTOME_Pathways_25.05.2022	8.02773e-10	2.67323e-07	1.37512e-14	3.02525e-13	[-1]	Group31	17.5	7	[FGFR3, HRAS, KRAS, NRAS, PPP2CA, RPS27A, UBA52]
R-HSA:5654743	Signaling by FGFR4	REACTOME_Pathways_25.05.2022	9.64257e-10	3.19169e-07	1.37512e-14	3.02525e-13	[-1]	Group31	17.0732	7	[FGFR4, HRAS, KRAS, NRAS, PPP2CA, RPS27A, UBA52]
R-HSA:5655253	Signaling by FGFR2 in disease	REACTOME_Pathways_25.05.2022	5.45116e-05	0.00523311	1.37512e-14	3.02525e-13	[-1]	Group31	9.30233	4	[FGFR2, HRAS, KRAS, NRAS]
R-HSA:5655291	Signaling by FGFR4 in disease	REACTOME_Pathways_25.05.2022	1.6409e-07	4.1843e-05	1.37512e-14	3.02525e-13	[-1]	Group31	36.3636	4	[FGFR4, HRAS, KRAS, NRAS]
R-HSA:5655302	Signaling by FGFR1 in disease	REACTOME_Pathways_25.05.2022	3.32128e-05	0.0036202	1.37512e-14	3.02525e-13	[-1]	Group31	10.5263	4	[FGFR1, HRAS, KRAS, NRAS]
R-HSA:5655332	Signaling by FGFR3 in disease	REACTOME_Pathways_25.05.2022	3.49206e-06	0.000600635	1.37512e-14	3.02525e-13	[-1]	Group31	18.1818	4	[FGFR3, HRAS, KRAS, NRAS]
R-HSA:5658442	Regulation of RAS by GAPs	REACTOME_Pathways_25.05.2022	1.93647e-05	0.00238186	1.37512e-14	3.02525e-13	[-1]	Group31	7.35294	5	[HRAS, KRAS, NRAS, RPS27A, UBA52]
R-HSA:5673000	RAF activation	REACTOME_Pathways_25.05.2022	7.91176e-07	0.000168521	1.37512e-14	3.02525e-13	[-1]	Group31	13.8889	5	[HRAS, KRAS, NRAS, PPP2CA, YWHAB]
R-HSA:5673001	RAF/MAP kinase cascade	REACTOME_Pathways_25.05.2022	9.28905e-10	3.08396e-07	1.37512e-14	3.02525e-13	[-1]	Group31	4.64286	13	[FGFR1, FGFR2, FGFR3, FGFR4, FYN, HRAS, KRAS, NRAS, PPP2CA, RPS27A, TEK, UBA52, YWHAB]
R-HSA:5674135	MAP2K and MAPK activation	REACTOME_Pathways_25.05.2022	4.08179e-05	0.00420424	1.37512e-14	3.02525e-13	[-1]	Group31	10	4	[HRAS, KRAS, NRAS, YWHAB]
R-HSA:5675221	Negative regulation of MAPK pathway	REACTOME_Pathways_25.05.2022	1.37129e-09	4.47041e-07	1.37512e-14	3.02525e-13	[-1]	Group31	16.2791	7	[HRAS, KRAS, NRAS, PPP2CA, RPS27A, UBA52, YWHAB]
R-HSA:5683057	MAPK family signaling cascades	REACTOME_Pathways_25.05.2022	2.74512e-13	1.02118e-10	1.37512e-14	3.02525e-13	[-1]	Group31	5.23077	17	[CDC42, CDK1, FGFR1, FGFR2, FGFR3, FGFR4, FYN, HRAS, KRAS, NRAS, PPP2CA, RAC1, RPS27A, SEPTIN7, TEK, UBA52, YWHAB]
R-HSA:5684996	MAPK1/MAPK3 signaling	REACTOME_Pathways_25.05.2022	9.9146e-11	3.50977e-08	1.37512e-14	3.02525e-13	[-1]	Group31	4.8951	14	[CDK1, FGFR1, FGFR2, FGFR3, FGFR4, FYN, HRAS, KRAS, NRAS, PPP2CA, RPS27A, TEK, UBA52, YWHAB]
R-HSA:6802946	Signaling by moderate kinase activity BRAF mutants	REACTOME_Pathways_25.05.2022	7.76306e-05	0.00683149	1.37512e-14	3.02525e-13	[-1]	Group31	8.51064	4	[HRAS, KRAS, NRAS, YWHAB]
R-HSA:6802948	Signaling by high-kinase activity BRAF mutants	REACTOME_Pathways_25.05.2022	2.67008e-05	0.00304389	1.37512e-14	3.02525e-13	[-1]	Group31	11.1111	4	[HRAS, KRAS, NRAS, YWHAB]
R-HSA:6802949	Signaling by RAS mutants	REACTOME_Pathways_25.05.2022	7.76306e-05	0.00683149	1.37512e-14	3.02525e-13	[-1]	Group31	8.51064	4	[HRAS, KRAS, NRAS, YWHAB]
R-HSA:6802952	Signaling by BRAF and RAF1 fusions	REACTOME_Pathways_25.05.2022	0.000309881	0.0176632	1.37512e-14	3.02525e-13	[-1]	Group31	5.97015	4	[HRAS, KRAS, NRAS, YWHAB]
R-HSA:6802955	Paradoxical activation of RAF signaling by kinase inactive BRAF	REACTOME_Pathways_25.05.2022	7.76306e-05	0.00683149	1.37512e-14	3.02525e-13	[-1]	Group31	8.51064	4	[HRAS, KRAS, NRAS, YWHAB]
R-HSA:6802957	Oncogenic MAPK signaling	REACTOME_Pathways_25.05.2022	0.000732786	0.0293114	1.37512e-14	3.02525e-13	[-1]	Group31	4.7619	4	[HRAS, KRAS, NRAS, YWHAB]
R-HSA:6806834	Signaling by MET	REACTOME_Pathways_25.05.2022	2.26483e-06	0.000412198	1.37512e-14	3.02525e-13	[-1]	Group31	7.59494	6	[HRAS, KRAS, NRAS, RAC1, RPS27A, UBA52]
R-HSA:6811558	PI5P, PP2A and IER3 Regulate PI3K/AKT Signaling	REACTOME_Pathways_25.05.2022	4.49962e-08	1.2374e-05	1.37512e-14	3.02525e-13	[-1]	Group31	7.54717	8	[FGFR1, FGFR2, FGFR3, FGFR4, FYN, LCK, PPP2CA, RAC1]
R-HSA:74751	Insulin receptor signalling cascade	REACTOME_Pathways_25.05.2022	7.21801e-09	2.18706e-06	1.37512e-14	3.02525e-13	[-1]	Group31	12.963	7	[FGFR1, FGFR2, FGFR3, FGFR4, HRAS, KRAS, NRAS]
R-HSA:74752	Signaling by Insulin receptor	REACTOME_Pathways_25.05.2022	3.90684e-09	1.22284e-06	1.37512e-14	3.02525e-13	[-1]	Group31	10.2564	8	[ATP6V1B2, FGFR1, FGFR2, FGFR3, FGFR4, HRAS, KRAS, NRAS]
R-HSA:9607240	FLT3 Signaling	REACTOME_Pathways_25.05.2022	9.54158e-12	3.47313e-09	1.37512e-14	3.02525e-13	[-1]	Group31	21.0526	8	[FYN, HCK, HRAS, KRAS, LCK, NRAS, RPS27A, UBA52]
R-HSA:9648002	RAS processing	REACTOME_Pathways_25.05.2022	1.75346e-07	4.43625e-05	1.37512e-14	3.02525e-13	[-1]	Group31	18.5185	5	[HRAS, KRAS, NRAS, RPS27A, UBA52]
R-HSA:9649948	Signaling downstream of RAS mutants	REACTOME_Pathways_25.05.2022	7.76306e-05	0.00683149	1.37512e-14	3.02525e-13	[-1]	Group31	8.51064	4	[HRAS, KRAS, NRAS, YWHAB]
R-HSA:9656223	Signaling by RAF1 mutants	REACTOME_Pathways_25.05.2022	5.45116e-05	0.00523311	1.37512e-14	3.02525e-13	[-1]	Group31	9.30233	4	[HRAS, KRAS, NRAS, YWHAB]
R-HSA:9682385	FLT3 signaling in disease	REACTOME_Pathways_25.05.2022	2.12651e-07	5.31628e-05	1.37512e-14	3.02525e-13	[-1]	Group31	17.8571	5	[HRAS, KRAS, NRAS, RPS27A, UBA52]
R-HSA:983705	Signaling by the B Cell Receptor (BCR)	REACTOME_Pathways_25.05.2022	6.9285e-08	1.86377e-05	1.37512e-14	3.02525e-13	[-1]	Group31	7.14286	8	[BLK, FYN, HRAS, KRAS, LYN, NRAS, RPS27A, UBA52]
R-HSA:109704	PI3K Cascade	REACTOME_Pathways_25.05.2022	5.97416e-05	0.00561571	1.35092e-15	3.2422e-14	[-1]	Group32	9.09091	4	[FGFR1, FGFR2, FGFR3, FGFR4]
R-HSA:114604	GPVI-mediated activation cascade	REACTOME_Pathways_25.05.2022	1.56894e-08	4.61269e-06	1.35092e-15	3.2422e-14	[-1]	Group32	17.1429	6	[CDC42, FYN, LCK, LYN, RAC1, RHOA]
R-HSA:1169408	ISG15 antiviral mechanism	REACTOME_Pathways_25.05.2022	0.00511222	0.0153367	1.35092e-15	3.2422e-14	[-1]	Group32	4.16667	3	[RPS27A, TPR, UBA52]
R-HSA:1227986	Signaling by ERBB2	REACTOME_Pathways_25.05.2022	9.99062e-11	3.52669e-08	1.35092e-15	3.2422e-14	[-1]	Group32	16	8	[FYN, HRAS, KRAS, NRAS, RHOA, RPS27A, UBA52, YES1]
R-HSA:1295596	Spry regulation of FGF signaling	REACTOME_Pathways_25.05.2022	5.83527e-05	0.00554351	1.35092e-15	3.2422e-14	[-1]	Group32	18.75	3	[PPP2CA, RPS27A, UBA52]
R-HSA:1433557	Signaling by SCF-KIT	REACTOME_Pathways_25.05.2022	2.77399e-11	9.95863e-09	1.35092e-15	3.2422e-14	[-1]	Group32	18.6047	8	[FYN, HRAS, KRAS, LCK, LYN, NRAS, RAC1, YES1]
R-HSA:1433559	Regulation of KIT signaling	REACTOME_Pathways_25.05.2022	8.88365e-07	0.000185668	1.35092e-15	3.2422e-14	[-1]	Group32	25	4	[FYN, LCK, LYN, YES1]
R-HSA:162906	HIV Infection	REACTOME_Pathways_25.05.2022	1.74272e-07	4.42651e-05	1.35092e-15	3.2422e-14	[-1]	Group32	4.329	10	[CDK9, FYN, HCK, LCK, RAC1, RPS27A, SLC25A4, SLC25A6, TPR, UBA52]
R-HSA:162909	Host Interactions of HIV factors	REACTOME_Pathways_25.05.2022	7.07282e-10	2.37647e-07	1.35092e-15	3.2422e-14	[-1]	Group32	7.69231	10	[CDK9, FYN, HCK, LCK, RAC1, RPS27A, SLC25A4, SLC25A6, TPR, UBA52]
R-HSA:164944	Nef and signal transduction	REACTOME_Pathways_25.05.2022	3.51964e-08	9.8198e-06	1.35092e-15	3.2422e-14	[-1]	Group32	50	4	[FYN, HCK, LCK, RAC1]
R-HSA:164952	The role of Nef in HIV-1 replication and disease pathogenesis	REACTOME_Pathways_25.05.2022	9.55974e-06	0.00134792	1.35092e-15	3.2422e-14	[-1]	Group32	14.2857	4	[FYN, HCK, LCK, RAC1]
R-HSA:166520	Signaling by NTRKs	REACTOME_Pathways_25.05.2022	1.73227e-08	5.05824e-06	1.35092e-15	3.2422e-14	[-1]	Group32	6.71642	9	[CDK5, FYN, HRAS, KRAS, NRAS, PPP2CA, RAC1, RHOA, YWHAB]
R-HSA:174048	APC/C:Cdc20 mediated degradation of Cyclin B	REACTOME_Pathways_25.05.2022	0.000205074	0.0141501	1.35092e-15	3.2422e-14	[-1]	Group32	12.5	3	[CDK1, RPS27A, UBA52]
R-HSA:174184	Cdc20:Phospho-APC/C mediated degradation of Cyclin A	REACTOME_Pathways_25.05.2022	0.00531287	0.0106257	1.35092e-15	3.2422e-14	[-1]	Group32	4.10959	3	[CDK1, RPS27A, UBA52]
R-HSA:179419	APC:Cdc20 mediated degradation of cell cycle proteins prior to satisfation of the cell cycle checkpoint	REACTOME_Pathways_25.05.2022	0.0055182	0.0055182	1.35092e-15	3.2422e-14	[-1]	Group32	4.05405	3	[CDK1, RPS27A, UBA52]
R-HSA:182971	EGFR downregulation	REACTOME_Pathways_25.05.2022	0.000444419	0.022221	1.35092e-15	3.2422e-14	[-1]	Group32	9.67742	3	[CDC42, RPS27A, UBA52]
R-HSA:194138	Signaling by VEGF	REACTOME_Pathways_25.05.2022	9.19498e-07	0.000190336	1.35092e-15	3.2422e-14	[-1]	Group32	6.48148	7	[CDC42, FYN, HRAS, KRAS, NRAS, RAC1, RHOA]
R-HSA:199418	Negative regulation of the PI3K/AKT network	REACTOME_Pathways_25.05.2022	7.42704e-08	1.99045e-05	1.35092e-15	3.2422e-14	[-1]	Group32	7.07965	8	[FGFR1, FGFR2, FGFR3, FGFR4, FYN, LCK, PPP2CA, RAC1]
R-HSA:202733	Cell surface interactions at the vascular wall	REACTOME_Pathways_25.05.2022	3.29989e-07	7.82075e-05	1.35092e-15	3.2422e-14	[-1]	Group32	5.83942	8	[FYN, HRAS, KRAS, LCK, LYN, NRAS, TEK, YES1]
R-HSA:2029480	Fcgamma receptor (FCGR) dependent phagocytosis	REACTOME_Pathways_25.05.2022	1.93155e-07	4.84818e-05	1.35092e-15	3.2422e-14	[-1]	Group32	8.13953	7	[CDC42, FGR, FYN, HCK, LYN, RAC1, YES1]
R-HSA:2029481	FCGR activation	REACTOME_Pathways_25.05.2022	1.82168e-09	5.81116e-07	1.35092e-15	3.2422e-14	[-1]	Group32	41.6667	5	[FGR, FYN, HCK, LYN, YES1]
R-HSA:210990	PECAM1 interactions	REACTOME_Pathways_25.05.2022	2.45225e-07	5.98348e-05	1.35092e-15	3.2422e-14	[-1]	Group32	33.3333	4	[FYN, LCK, LYN, YES1]
R-HSA:2172127	DAP12 interactions	REACTOME_Pathways_25.05.2022	7.57295e-08	2.02198e-05	1.35092e-15	3.2422e-14	[-1]	Group32	13.3333	6	[FYN, HRAS, KRAS, LCK, NRAS, RAC1]
R-HSA:2173788	Downregulation of TGF-beta receptor signaling	REACTOME_Pathways_25.05.2022	0.000261597	0.0164806	1.35092e-15	3.2422e-14	[-1]	Group32	11.5385	3	[PPP1CA, RPS27A, UBA52]
R-HSA:2173789	TGF-beta receptor signaling activates SMADs	REACTOME_Pathways_25.05.2022	0.00142428	0.0341826	1.35092e-15	3.2422e-14	[-1]	Group32	6.52174	3	[PPP1CA, RPS27A, UBA52]
R-HSA:2173791	TGF-beta receptor signaling in EMT (epithelial to mesenchymal transition)	REACTOME_Pathways_25.05.2022	5.83527e-05	0.00554351	1.35092e-15	3.2422e-14	[-1]	Group32	18.75	3	[RHOA, RPS27A, UBA52]
R-HSA:2173793	Transcriptional activity of SMAD2/SMAD3:SMAD4 heterotrimer	REACTOME_Pathways_25.05.2022	0.00142428	0.0341826	1.35092e-15	3.2422e-14	[-1]	Group32	6.52174	3	[CDK9, RPS27A, UBA52]
R-HSA:2173796	SMAD2/SMAD3:SMAD4 heterotrimer regulates transcription	REACTOME_Pathways_25.05.2022	0.000488682	0.0234567	1.35092e-15	3.2422e-14	[-1]	Group32	9.375	3	[CDK9, RPS27A, UBA52]
R-HSA:2219528	PI3K/AKT Signaling in Cancer	REACTOME_Pathways_25.05.2022	7.11608e-07	0.000152996	1.35092e-15	3.2422e-14	[-1]	Group32	6.73077	7	[FGFR1, FGFR2, FGFR3, FGFR4, FYN, LCK, RAC1]
R-HSA:2219530	Constitutive Signaling by Aberrant PI3K in Cancer	REACTOME_Pathways_25.05.2022	9.79978e-08	2.58714e-05	1.35092e-15	3.2422e-14	[-1]	Group32	8.97436	7	[FGFR1, FGFR2, FGFR3, FGFR4, FYN, LCK, RAC1]
R-HSA:2424491	DAP12 signaling	REACTOME_Pathways_25.05.2022	5.85205e-09	1.79658e-06	1.35092e-15	3.2422e-14	[-1]	Group32	20	6	[FYN, HRAS, KRAS, LCK, NRAS, RAC1]
R-HSA:2454202	Fc epsilon receptor (FCERI) signaling	REACTOME_Pathways_25.05.2022	2.78386e-07	6.76478e-05	1.35092e-15	3.2422e-14	[-1]	Group32	5.97015	8	[FYN, HRAS, KRAS, LYN, NRAS, RAC1, RPS27A, UBA52]
R-HSA:2682334	EPH-Ephrin signaling	REACTOME_Pathways_25.05.2022	3.07598e-07	7.3516e-05	1.35092e-15	3.2422e-14	[-1]	Group32	7.6087	7	[CDC42, FYN, HRAS, LYN, RAC1, RHOA, YES1]
R-HSA:2871796	FCERI mediated MAPK activation	REACTOME_Pathways_25.05.2022	4.2912e-07	9.99849e-05	1.35092e-15	3.2422e-14	[-1]	Group32	15.625	5	[HRAS, KRAS, LYN, NRAS, RAC1]
R-HSA:373752	Netrin-1 signaling	REACTOME_Pathways_25.05.2022	0.00181353	0.0362707	1.35092e-15	3.2422e-14	[-1]	Group32	6	3	[CDC42, FYN, RAC1]
R-HSA:373755	Semaphorin interactions	REACTOME_Pathways_25.05.2022	0.000275745	0.0168205	1.35092e-15	3.2422e-14	[-1]	Group32	6.15385	4	[CDK5, FYN, RAC1, RHOA]
R-HSA:3769402	Deactivation of the beta-catenin transactivating complex	REACTOME_Pathways_25.05.2022	0.00109225	0.0316752	1.35092e-15	3.2422e-14	[-1]	Group32	7.14286	3	[RPS27A, UBA52, YWHAZ]
R-HSA:388841	Costimulation by the CD28 family	REACTOME_Pathways_25.05.2022	4.14585e-08	1.14426e-05	1.35092e-15	3.2422e-14	[-1]	Group32	10.1449	7	[CDC42, FYN, LCK, LYN, PPP2CA, RAC1, YES1]
R-HSA:389356	CD28 co-stimulation	REACTOME_Pathways_25.05.2022	1.07893e-08	3.2152e-06	1.35092e-15	3.2422e-14	[-1]	Group32	18.1818	6	[CDC42, FYN, LCK, LYN, RAC1, YES1]
R-HSA:389359	CD28 dependent Vav1 pathway	REACTOME_Pathways_25.05.2022	2.45225e-07	5.98348e-05	1.35092e-15	3.2422e-14	[-1]	Group32	33.3333	4	[CDC42, FYN, LCK, RAC1]
R-HSA:389513	CTLA4 inhibitory signaling	REACTOME_Pathways_25.05.2022	4.52226e-08	1.2391e-05	1.35092e-15	3.2422e-14	[-1]	Group32	23.8095	5	[FYN, LCK, LYN, PPP2CA, YES1]
R-HSA:3928662	EPHB-mediated forward signaling	REACTOME_Pathways_25.05.2022	1.15257e-09	3.79197e-07	1.35092e-15	3.2422e-14	[-1]	Group32	16.6667	7	[CDC42, FYN, HRAS, LYN, RAC1, RHOA, YES1]
R-HSA:3928663	EPHA-mediated growth cone collapse	REACTOME_Pathways_25.05.2022	1.2701e-05	0.00170194	1.35092e-15	3.2422e-14	[-1]	Group32	13.3333	4	[FYN, LYN, RHOA, YES1]
R-HSA:3928665	EPH-ephrin mediated repulsion of cells	REACTOME_Pathways_25.05.2022	0.000107171	0.00868085	1.35092e-15	3.2422e-14	[-1]	Group32	7.84314	4	[FYN, LYN, RAC1, YES1]
R-HSA:400253	Circadian Clock	REACTOME_Pathways_25.05.2022	0.00472485	0.0236243	1.35092e-15	3.2422e-14	[-1]	Group32	4.28571	3	[PPP1CA, RPS27A, UBA52]
R-HSA:418885	DCC mediated attractive signaling	REACTOME_Pathways_25.05.2022	3.81963e-05	0.00401061	1.35092e-15	3.2422e-14	[-1]	Group32	21.4286	3	[CDC42, FYN, RAC1]
R-HSA:4420097	VEGFA-VEGFR2 Pathway	REACTOME_Pathways_25.05.2022	5.08557e-07	0.000114425	1.35092e-15	3.2422e-14	[-1]	Group32	7.07071	7	[CDC42, FYN, HRAS, KRAS, NRAS, RAC1, RHOA]
R-HSA:448424	Interleukin-17 signaling	REACTOME_Pathways_25.05.2022	0.00511222	0.0153367	1.35092e-15	3.2422e-14	[-1]	Group32	4.16667	3	[PPP2CA, RPS27A, UBA52]
R-HSA:450294	MAP kinase activation	REACTOME_Pathways_25.05.2022	0.00367187	0.0330468	1.35092e-15	3.2422e-14	[-1]	Group32	4.6875	3	[PPP2CA, RPS27A, UBA52]
R-HSA:450531	Regulation of mRNA stability by proteins that bind AU-rich elements	REACTOME_Pathways_25.05.2022	0.000872685	0.0314167	1.35092e-15	3.2422e-14	[-1]	Group32	4.54545	4	[RPS27A, UBA52, YWHAB, YWHAZ]
R-HSA:512988	Interleukin-3, Interleukin-5 and GM-CSF signaling	REACTOME_Pathways_25.05.2022	3.07238e-09	9.67799e-07	1.35092e-15	3.2422e-14	[-1]	Group32	14.5833	7	[FYN, HCK, LYN, RPS27A, UBA52, YES1, YWHAZ]
R-HSA:5621481	C-type lectin receptors (CLRs)	REACTOME_Pathways_25.05.2022	5.73729e-06	0.000900755	1.35092e-15	3.2422e-14	[-1]	Group32	4.92958	7	[FYN, HRAS, KRAS, LYN, NRAS, RPS27A, UBA52]
R-HSA:5621575	CD209 (DC-SIGN) signaling	REACTOME_Pathways_25.05.2022	4.52226e-08	1.2391e-05	1.35092e-15	3.2422e-14	[-1]	Group32	23.8095	5	[FYN, HRAS, KRAS, LYN, NRAS]
R-HSA:5625970	RHO GTPases activate KTN1	REACTOME_Pathways_25.05.2022	1.74975e-05	0.00220468	1.35092e-15	3.2422e-14	[-1]	Group32	27.2727	3	[CDC42, RAC1, RHOA]
R-HSA:5626467	RHO GTPases activate IQGAPs	REACTOME_Pathways_25.05.2022	4.2912e-07	9.99849e-05	1.35092e-15	3.2422e-14	[-1]	Group32	15.625	5	[CDC42, RAC1, TUBA3C, TUBA3D, TUBA3E]
R-HSA:5654732	Negative regulation of FGFR3 signaling	REACTOME_Pathways_25.05.2022	1.10483e-05	0.00152467	1.35092e-15	3.2422e-14	[-1]	Group32	13.7931	4	[FGFR3, PPP2CA, RPS27A, UBA52]
R-HSA:5663220	RHO GTPases Activate Formins	REACTOME_Pathways_25.05.2022	5.22445e-06	0.000841136	1.35092e-15	3.2422e-14	[-1]	Group32	5	7	[CDC42, PPP2CA, RAC1, RHOA, TUBA3C, TUBA3D, TUBA3E]
R-HSA:6811558	PI5P, PP2A and IER3 Regulate PI3K/AKT Signaling	REACTOME_Pathways_25.05.2022	4.49962e-08	1.2374e-05	1.35092e-15	3.2422e-14	[-1]	Group32	7.54717	8	[FGFR1, FGFR2, FGFR3, FGFR4, FYN, LCK, PPP2CA, RAC1]
R-HSA:68949	Orc1 removal from chromatin	REACTOME_Pathways_25.05.2022	0.00491623	0.0196649	1.35092e-15	3.2422e-14	[-1]	Group32	4.22535	3	[CDK2, RPS27A, UBA52]
R-HSA:69017	CDK-mediated phosphorylation and removal of Cdc6	REACTOME_Pathways_25.05.2022	0.00531287	0.0106257	1.35092e-15	3.2422e-14	[-1]	Group32	4.10959	3	[CDK2, RPS27A, UBA52]
R-HSA:69231	Cyclin D associated events in G1	REACTOME_Pathways_25.05.2022	2.63464e-09	8.32547e-07	1.35092e-15	3.2422e-14	[-1]	Group32	14.8936	7	[CDK2, CDK4, CDK6, LYN, PPP2CA, RPS27A, UBA52]
R-HSA:69236	G1 Phase	REACTOME_Pathways_25.05.2022	2.63464e-09	8.32547e-07	1.35092e-15	3.2422e-14	[-1]	Group32	14.8936	7	[CDK2, CDK4, CDK6, LYN, PPP2CA, RPS27A, UBA52]
R-HSA:69563	p53-Dependent G1 DNA Damage Response	REACTOME_Pathways_25.05.2022	0.00400495	0.0320396	1.35092e-15	3.2422e-14	[-1]	Group32	4.54545	3	[CDK2, RPS27A, UBA52]
R-HSA:69580	p53-Dependent G1/S DNA damage checkpoint	REACTOME_Pathways_25.05.2022	0.00400495	0.0320396	1.35092e-15	3.2422e-14	[-1]	Group32	4.54545	3	[CDK2, RPS27A, UBA52]
R-HSA:69615	G1/S DNA Damage Checkpoints	REACTOME_Pathways_25.05.2022	0.00435585	0.0261351	1.35092e-15	3.2422e-14	[-1]	Group32	4.41176	3	[CDK2, RPS27A, UBA52]
R-HSA:75815	Ubiquitin-dependent degradation of Cyclin D	REACTOME_Pathways_25.05.2022	0.00203066	0.0365519	1.35092e-15	3.2422e-14	[-1]	Group32	5.76923	3	[CDK4, RPS27A, UBA52]
R-HSA:8849471	PTK6 Regulates RHO GTPases, RAS GTPase and MAP kinases	REACTOME_Pathways_25.05.2022	4.56974e-09	1.42119e-06	1.35092e-15	3.2422e-14	[-1]	Group32	35.7143	5	[HRAS, KRAS, NRAS, RAC1, RHOA]
R-HSA:8878166	Transcriptional regulation by RUNX2	REACTOME_Pathways_25.05.2022	0.000301939	0.0175124	1.35092e-15	3.2422e-14	[-1]	Group32	4.13223	5	[CDK1, CDK4, RPS27A, UBA52, YES1]
R-HSA:9006115	Signaling by NTRK2 (TRKB)	REACTOME_Pathways_25.05.2022	1.7797e-09	5.69503e-07	1.35092e-15	3.2422e-14	[-1]	Group32	24	6	[CDK5, FYN, HRAS, KRAS, NRAS, RAC1]
R-HSA:912631	Regulation of signaling by CBL	REACTOME_Pathways_25.05.2022	7.58591e-10	2.54128e-07	1.35092e-15	3.2422e-14	[-1]	Group32	27.2727	6	[FYN, HCK, LYN, RPS27A, UBA52, YES1]
R-HSA:917937	Iron uptake and transport	REACTOME_Pathways_25.05.2022	0.00277664	0.0360963	1.35092e-15	3.2422e-14	[-1]	Group32	5.17241	3	[ATP6V1B2, RPS27A, UBA52]
R-HSA:9604323	Negative regulation of NOTCH4 signaling	REACTOME_Pathways_25.05.2022	0.00226331	0.0384763	1.35092e-15	3.2422e-14	[-1]	Group32	5.55556	3	[RPS27A, UBA52, YWHAZ]
R-HSA:9607240	FLT3 Signaling	REACTOME_Pathways_25.05.2022	9.54158e-12	3.47313e-09	1.35092e-15	3.2422e-14	[-1]	Group32	21.0526	8	[FYN, HCK, HRAS, KRAS, LCK, NRAS, RPS27A, UBA52]
R-HSA:9664323	FCGR3A-mediated IL10 synthesis	REACTOME_Pathways_25.05.2022	1.36002e-06	0.000266563	1.35092e-15	3.2422e-14	[-1]	Group32	12.5	5	[FGR, FYN, HCK, LYN, YES1]
R-HSA:9664407	Parasite infection	REACTOME_Pathways_25.05.2022	1.36339e-08	4.03563e-06	1.35092e-15	3.2422e-14	[-1]	Group32	11.8644	7	[CDC42, FGR, FYN, HCK, LYN, RAC1, YES1]
R-HSA:9664417	Leishmania phagocytosis	REACTOME_Pathways_25.05.2022	1.36339e-08	4.03563e-06	1.35092e-15	3.2422e-14	[-1]	Group32	11.8644	7	[CDC42, FGR, FYN, HCK, LYN, RAC1, YES1]
R-HSA:9664422	FCGR3A-mediated phagocytosis	REACTOME_Pathways_25.05.2022	1.36339e-08	4.03563e-06	1.35092e-15	3.2422e-14	[-1]	Group32	11.8644	7	[CDC42, FGR, FYN, HCK, LYN, RAC1, YES1]
R-HSA:9669938	Signaling by KIT in disease	REACTOME_Pathways_25.05.2022	3.61064e-12	1.32511e-09	1.35092e-15	3.2422e-14	[-1]	Group32	35	7	[FYN, HRAS, KRAS, LCK, LYN, NRAS, YES1]
R-HSA:9670439	Signaling by phosphorylated juxtamembrane, extracellular and kinase domain KIT mutants	REACTOME_Pathways_25.05.2022	3.61064e-12	1.32511e-09	1.35092e-15	3.2422e-14	[-1]	Group32	35	7	[FYN, HRAS, KRAS, LCK, LYN, NRAS, YES1]
R-HSA:9674555	Signaling by CSF3 (G-CSF)	REACTOME_Pathways_25.05.2022	3.05999e-07	7.34397e-05	1.35092e-15	3.2422e-14	[-1]	Group32	16.6667	5	[HCK, KRAS, LYN, RPS27A, UBA52]
R-HSA:9705462	Inactivation of CSF3 (G-CSF) signaling	REACTOME_Pathways_25.05.2022	5.97221e-06	0.000925692	1.35092e-15	3.2422e-14	[-1]	Group32	16	4	[HCK, LYN, RPS27A, UBA52]
R-HSA:9706374	FLT3 signaling through SRC family kinases	REACTOME_Pathways_25.05.2022	2.15848e-06	0.000395002	1.35092e-15	3.2422e-14	[-1]	Group32	50	3	[FYN, HCK, LCK]
R-HSA:983695	Antigen activates B Cell Receptor (BCR) leading to generation of second messengers	REACTOME_Pathways_25.05.2022	0.000488682	0.0234567	1.35092e-15	3.2422e-14	[-1]	Group32	9.375	3	[BLK, FYN, LYN]
R-HSA:983705	Signaling by the B Cell Receptor (BCR)	REACTOME_Pathways_25.05.2022	6.9285e-08	1.86377e-05	1.35092e-15	3.2422e-14	[-1]	Group32	7.14286	8	[BLK, FYN, HRAS, KRAS, LYN, NRAS, RPS27A, UBA52]
R-HSA:109606	Intrinsic Pathway for Apoptosis	REACTOME_Pathways_25.05.2022	6.79048e-06	0.00101857	1.06329e-23	3.61518e-22	[-1]	Group33	9.09091	5	[SFN, YWHAB, YWHAG, YWHAH, YWHAZ]
R-HSA:110328	Recognition and association of DNA glycosylase with site containing an affected pyrimidine	REACTOME_Pathways_25.05.2022	1.13502e-05	0.00154362	1.06329e-23	3.61518e-22	[-1]	Group33	8.19672	5	[H2AC6, H2AC7, H2AJ, H2AX, H3-4]
R-HSA:110329	Cleavage of the damaged pyrimidine	REACTOME_Pathways_25.05.2022	1.13502e-05	0.00154362	1.06329e-23	3.61518e-22	[-1]	Group33	8.19672	5	[H2AC6, H2AC7, H2AJ, H2AX, H3-4]
R-HSA:110330	Recognition and association of DNA glycosylase with site containing an affected purine	REACTOME_Pathways_25.05.2022	7.42785e-06	0.00109932	1.06329e-23	3.61518e-22	[-1]	Group33	8.92857	5	[H2AC6, H2AC7, H2AJ, H2AX, H3-4]
R-HSA:110331	Cleavage of the damaged purine	REACTOME_Pathways_25.05.2022	7.42785e-06	0.00109932	1.06329e-23	3.61518e-22	[-1]	Group33	8.92857	5	[H2AC6, H2AC7, H2AJ, H2AX, H3-4]
R-HSA:111447	Activation of BAD and translocation to mitochondria	REACTOME_Pathways_25.05.2022	6.82847e-09	2.08268e-06	1.06329e-23	3.61518e-22	[-1]	Group33	33.3333	5	[SFN, YWHAB, YWHAG, YWHAH, YWHAZ]
R-HSA:114452	Activation of BH3-only proteins	REACTOME_Pathways_25.05.2022	3.05999e-07	7.34397e-05	1.06329e-23	3.61518e-22	[-1]	Group33	16.6667	5	[SFN, YWHAB, YWHAG, YWHAH, YWHAZ]
R-HSA:114604	GPVI-mediated activation cascade	REACTOME_Pathways_25.05.2022	1.56894e-08	4.61269e-06	1.06329e-23	3.61518e-22	[-1]	Group33	17.1429	6	[CDC42, FYN, LCK, LYN, RAC1, RHOA]
R-HSA:1168372	Downstream signaling events of B Cell Receptor (BCR)	REACTOME_Pathways_25.05.2022	5.09445e-05	0.0050435	1.06329e-23	3.61518e-22	[-1]	Group33	6.0241	5	[HRAS, KRAS, NRAS, RPS27A, UBA52]
R-HSA:1169408	ISG15 antiviral mechanism	REACTOME_Pathways_25.05.2022	0.00511222	0.0153367	1.06329e-23	3.61518e-22	[-1]	Group33	4.16667	3	[RPS27A, TPR, UBA52]
R-HSA:1221632	Meiotic synapsis	REACTOME_Pathways_25.05.2022	4.01511e-05	0.00417572	1.06329e-23	3.61518e-22	[-1]	Group33	6.32911	5	[H2AC6, H2AC7, H2AJ, H2AX, H3-4]
R-HSA:1227986	Signaling by ERBB2	REACTOME_Pathways_25.05.2022	9.99062e-11	3.52669e-08	1.06329e-23	3.61518e-22	[-1]	Group33	16	8	[FYN, HRAS, KRAS, NRAS, RHOA, RPS27A, UBA52, YES1]
R-HSA:1236382	Constitutive Signaling by Ligand-Responsive EGFR Cancer Variants	REACTOME_Pathways_25.05.2022	2.60397e-08	7.4213e-06	1.06329e-23	3.61518e-22	[-1]	Group33	26.3158	5	[HRAS, KRAS, NRAS, RPS27A, UBA52]
R-HSA:1236394	Signaling by ERBB4	REACTOME_Pathways_25.05.2022	8.84255e-06	0.00127333	1.06329e-23	3.61518e-22	[-1]	Group33	8.62069	5	[HRAS, KRAS, NRAS, RPS27A, UBA52]
R-HSA:1295596	Spry regulation of FGF signaling	REACTOME_Pathways_25.05.2022	5.83527e-05	0.00554351	1.06329e-23	3.61518e-22	[-1]	Group33	18.75	3	[PPP2CA, RPS27A, UBA52]
R-HSA:1445148	Translocation of SLC2A4 (GLUT4) to the plasma membrane	REACTOME_Pathways_25.05.2022	6.45783e-11	2.29253e-08	1.06329e-23	3.61518e-22	[-1]	Group33	12.5	9	[RAC1, SFN, TUBA3C, TUBA3D, TUBA3E, YWHAB, YWHAG, YWHAH, YWHAZ]
R-HSA:157579	Telomere Maintenance	REACTOME_Pathways_25.05.2022	1.24885e-06	0.000248522	1.06329e-23	3.61518e-22	[-1]	Group33	6.19469	7	[CDK2, H2AC6, H2AC7, H2AJ, H2AX, H3-3A, H3-4]
R-HSA:157858	Gap junction trafficking and regulation	REACTOME_Pathways_25.05.2022	0.00171067	0.0359241	1.06329e-23	3.61518e-22	[-1]	Group33	6.12245	3	[TUBA3C, TUBA3D, TUBA3E]
R-HSA:162906	HIV Infection	REACTOME_Pathways_25.05.2022	1.74272e-07	4.42651e-05	1.06329e-23	3.61518e-22	[-1]	Group33	4.329	10	[CDK9, FYN, HCK, LCK, RAC1, RPS27A, SLC25A4, SLC25A6, TPR, UBA52]
R-HSA:162909	Host Interactions of HIV factors	REACTOME_Pathways_25.05.2022	7.07282e-10	2.37647e-07	1.06329e-23	3.61518e-22	[-1]	Group33	7.69231	10	[CDK9, FYN, HCK, LCK, RAC1, RPS27A, SLC25A4, SLC25A6, TPR, UBA52]
R-HSA:1643713	Signaling by EGFR in Cancer	REACTOME_Pathways_25.05.2022	1.16283e-07	3.02337e-05	1.06329e-23	3.61518e-22	[-1]	Group33	20	5	[HRAS, KRAS, NRAS, RPS27A, UBA52]
R-HSA:170834	Signaling by TGF-beta Receptor Complex	REACTOME_Pathways_25.05.2022	7.11878e-05	0.00647809	1.06329e-23	3.61518e-22	[-1]	Group33	5.61798	5	[CDK9, PPP1CA, RHOA, RPS27A, UBA52]
R-HSA:171306	Packaging Of Telomere Ends	REACTOME_Pathways_25.05.2022	5.13146e-06	0.000836427	1.06329e-23	3.61518e-22	[-1]	Group33	9.61539	5	[H2AC6, H2AC7, H2AJ, H2AX, H3-4]
R-HSA:174048	APC/C:Cdc20 mediated degradation of Cyclin B	REACTOME_Pathways_25.05.2022	0.000205074	0.0141501	1.06329e-23	3.61518e-22	[-1]	Group33	12.5	3	[CDK1, RPS27A, UBA52]
R-HSA:174143	APC/C-mediated degradation of cell cycle proteins	REACTOME_Pathways_25.05.2022	0.000872685	0.0314167	1.06329e-23	3.61518e-22	[-1]	Group33	4.54545	4	[CDK1, CDK2, RPS27A, UBA52]
R-HSA:174184	Cdc20:Phospho-APC/C mediated degradation of Cyclin A	REACTOME_Pathways_25.05.2022	0.00531287	0.0106257	1.06329e-23	3.61518e-22	[-1]	Group33	4.10959	3	[CDK1, RPS27A, UBA52]
R-HSA:176408	Regulation of APC/C activators between G1/S and early anaphase	REACTOME_Pathways_25.05.2022	0.000638861	0.0281099	1.06329e-23	3.61518e-22	[-1]	Group33	4.93827	4	[CDK1, CDK2, RPS27A, UBA52]
R-HSA:177929	Signaling by EGFR	REACTOME_Pathways_25.05.2022	1.44904e-07	3.70953e-05	1.06329e-23	3.61518e-22	[-1]	Group33	12	6	[CDC42, HRAS, KRAS, NRAS, RPS27A, UBA52]
R-HSA:179419	APC:Cdc20 mediated degradation of cell cycle proteins prior to satisfation of the cell cycle checkpoint	REACTOME_Pathways_25.05.2022	0.0055182	0.0055182	1.06329e-23	3.61518e-22	[-1]	Group33	4.05405	3	[CDK1, RPS27A, UBA52]
R-HSA:182971	EGFR downregulation	REACTOME_Pathways_25.05.2022	0.000444419	0.022221	1.06329e-23	3.61518e-22	[-1]	Group33	9.67742	3	[CDC42, RPS27A, UBA52]
R-HSA:187577	SCF(Skp2)-mediated degradation of p27/p21	REACTOME_Pathways_25.05.2022	0.000202297	0.0141608	1.06329e-23	3.61518e-22	[-1]	Group33	6.66667	4	[CDK2, CDK4, RPS27A, UBA52]
R-HSA:190236	Signaling by FGFR	REACTOME_Pathways_25.05.2022	1.25884e-11	4.5696e-09	1.06329e-23	3.61518e-22	[-1]	Group33	11.4943	10	[FGFR1, FGFR2, FGFR3, FGFR4, HRAS, KRAS, NRAS, PPP2CA, RPS27A, UBA52]
R-HSA:190828	Gap junction trafficking	REACTOME_Pathways_25.05.2022	0.00151609	0.0348701	1.06329e-23	3.61518e-22	[-1]	Group33	6.38298	3	[TUBA3C, TUBA3D, TUBA3E]
R-HSA:190840	Microtubule-dependent trafficking of connexons from Golgi to the plasma membrane	REACTOME_Pathways_25.05.2022	8.44341e-05	0.0071769	1.06329e-23	3.61518e-22	[-1]	Group33	16.6667	3	[TUBA3C, TUBA3D, TUBA3E]
R-HSA:190861	Gap junction assembly	REACTOME_Pathways_25.05.2022	0.000693702	0.0291355	1.06329e-23	3.61518e-22	[-1]	Group33	8.33333	3	[TUBA3C, TUBA3D, TUBA3E]
R-HSA:190872	Transport of connexons to the plasma membrane	REACTOME_Pathways_25.05.2022	9.99147e-05	0.00819301	1.06329e-23	3.61518e-22	[-1]	Group33	15.7895	3	[TUBA3C, TUBA3D, TUBA3E]
R-HSA:193704	p75 NTR receptor-mediated signalling	REACTOME_Pathways_25.05.2022	0.00125454	0.032618	1.06329e-23	3.61518e-22	[-1]	Group33	4.12371	4	[RAC1, RHOA, RPS27A, UBA52]
R-HSA:194138	Signaling by VEGF	REACTOME_Pathways_25.05.2022	9.19498e-07	0.000190336	1.06329e-23	3.61518e-22	[-1]	Group33	6.48148	7	[CDC42, FYN, HRAS, KRAS, NRAS, RAC1, RHOA]
R-HSA:195258	RHO GTPase Effectors	REACTOME_Pathways_25.05.2022	2.11116e-14	8.0013e-12	1.06329e-23	3.61518e-22	[-1]	Group33	5.50459	18	[CDC42, H2AC6, H2AC7, H2AJ, H2AX, H3-3A, H3C14, PPP2CA, RAC1, RHOA, SFN, TUBA3C, TUBA3D, TUBA3E, YWHAB, YWHAG, YWHAH, YWHAZ]
R-HSA:195721	Signaling by WNT	REACTOME_Pathways_25.05.2022	6.2109e-11	2.21108e-08	1.06329e-23	3.61518e-22	[-1]	Group33	4.51807	15	[H2AC6, H2AC7, H2AJ, H2AX, H3-3A, H3-4, H3C14, KRAS, PPP2CA, RAC1, RAC3, RHOA, RPS27A, UBA52, YWHAZ]
R-HSA:201681	TCF dependent signaling in response to WNT	REACTOME_Pathways_25.05.2022	1.66827e-08	4.88803e-06	1.06329e-23	3.61518e-22	[-1]	Group33	4.72103	11	[H2AC6, H2AC7, H2AJ, H2AX, H3-3A, H3-4, H3C14, PPP2CA, RPS27A, UBA52, YWHAZ]
R-HSA:2029481	FCGR activation	REACTOME_Pathways_25.05.2022	1.82168e-09	5.81116e-07	1.06329e-23	3.61518e-22	[-1]	Group33	41.6667	5	[FGR, FYN, HCK, LYN, YES1]
R-HSA:2173788	Downregulation of TGF-beta receptor signaling	REACTOME_Pathways_25.05.2022	0.000261597	0.0164806	1.06329e-23	3.61518e-22	[-1]	Group33	11.5385	3	[PPP1CA, RPS27A, UBA52]
R-HSA:2173789	TGF-beta receptor signaling activates SMADs	REACTOME_Pathways_25.05.2022	0.00142428	0.0341826	1.06329e-23	3.61518e-22	[-1]	Group33	6.52174	3	[PPP1CA, RPS27A, UBA52]
R-HSA:2173791	TGF-beta receptor signaling in EMT (epithelial to mesenchymal transition)	REACTOME_Pathways_25.05.2022	5.83527e-05	0.00554351	1.06329e-23	3.61518e-22	[-1]	Group33	18.75	3	[RHOA, RPS27A, UBA52]
R-HSA:2173793	Transcriptional activity of SMAD2/SMAD3:SMAD4 heterotrimer	REACTOME_Pathways_25.05.2022	0.00142428	0.0341826	1.06329e-23	3.61518e-22	[-1]	Group33	6.52174	3	[CDK9, RPS27A, UBA52]
R-HSA:2173796	SMAD2/SMAD3:SMAD4 heterotrimer regulates transcription	REACTOME_Pathways_25.05.2022	0.000488682	0.0234567	1.06329e-23	3.61518e-22	[-1]	Group33	9.375	3	[CDK9, RPS27A, UBA52]
R-HSA:2454202	Fc epsilon receptor (FCERI) signaling	REACTOME_Pathways_25.05.2022	2.78386e-07	6.76478e-05	1.06329e-23	3.61518e-22	[-1]	Group33	5.97015	8	[FYN, HRAS, KRAS, LYN, NRAS, RAC1, RPS27A, UBA52]
R-HSA:2559580	Oxidative Stress Induced Senescence	REACTOME_Pathways_25.05.2022	4.80296e-10	1.64261e-07	1.06329e-23	3.61518e-22	[-1]	Group33	8	10	[CDK4, CDK6, H2AC6, H2AC7, H2AJ, H2AX, H3-3A, H3C14, RPS27A, UBA52]
R-HSA:2559582	Senescence-Associated Secretory Phenotype (SASP)	REACTOME_Pathways_25.05.2022	6.51377e-12	2.37752e-09	1.06329e-23	3.61518e-22	[-1]	Group33	9.82143	11	[CDK2, CDK4, CDK6, H2AC6, H2AC7, H2AJ, H2AX, H3-3A, H3C14, RPS27A, UBA52]
R-HSA:2559583	Cellular Senescence	REACTOME_Pathways_25.05.2022	1.94039e-10	6.79138e-08	1.06329e-23	3.61518e-22	[-1]	Group33	6.09137	12	[CDK2, CDK4, CDK6, H2AC6, H2AC7, H2AJ, H2AX, H3-3A, H3-4, H3C14, RPS27A, UBA52]
R-HSA:2559585	Oncogene Induced Senescence	REACTOME_Pathways_25.05.2022	1.87553e-05	0.00232566	1.06329e-23	3.61518e-22	[-1]	Group33	12.1212	4	[CDK4, CDK6, RPS27A, UBA52]
R-HSA:2559586	DNA Damage/Telomere Stress Induced Senescence	REACTOME_Pathways_25.05.2022	2.43898e-06	0.000439017	1.06329e-23	3.61518e-22	[-1]	Group33	7.5	6	[CDK2, H2AC6, H2AC7, H2AJ, H2AX, H3-4]
R-HSA:2565942	Regulation of PLK1 Activity at G2/M Transition	REACTOME_Pathways_25.05.2022	0.000872685	0.0314167	1.06329e-23	3.61518e-22	[-1]	Group33	4.54545	4	[CDK1, RPS27A, UBA52, YWHAG]
R-HSA:2995410	Nuclear Envelope (NE) Reassembly	REACTOME_Pathways_25.05.2022	3.12195e-05	0.00343415	1.06329e-23	3.61518e-22	[-1]	Group33	6.66667	5	[CDK1, PPP2CA, TUBA3C, TUBA3D, TUBA3E]
R-HSA:3371497	HSP90 chaperone cycle for steroid hormone receptors (SHR) in the presence of ligand	REACTOME_Pathways_25.05.2022	0.00238557	0.0381691	1.06329e-23	3.61518e-22	[-1]	Group33	5.45455	3	[TUBA3C, TUBA3D, TUBA3E]
R-HSA:373752	Netrin-1 signaling	REACTOME_Pathways_25.05.2022	0.00181353	0.0362707	1.06329e-23	3.61518e-22	[-1]	Group33	6	3	[CDC42, FYN, RAC1]
R-HSA:373755	Semaphorin interactions	REACTOME_Pathways_25.05.2022	0.000275745	0.0168205	1.06329e-23	3.61518e-22	[-1]	Group33	6.15385	4	[CDK5, FYN, RAC1, RHOA]
R-HSA:373760	L1CAM interactions	REACTOME_Pathways_25.05.2022	0.000279513	0.0167708	1.06329e-23	3.61518e-22	[-1]	Group33	4.20168	5	[FGFR1, RAC1, TUBA3C, TUBA3D, TUBA3E]
R-HSA:3769402	Deactivation of the beta-catenin transactivating complex	REACTOME_Pathways_25.05.2022	0.00109225	0.0316752	1.06329e-23	3.61518e-22	[-1]	Group33	7.14286	3	[RPS27A, UBA52, YWHAZ]
R-HSA:380320	Recruitment of NuMA to mitotic centrosomes	REACTOME_Pathways_25.05.2022	9.23691e-05	0.00766663	1.06329e-23	3.61518e-22	[-1]	Group33	5.31915	5	[CDK1, TUBA3C, TUBA3D, TUBA3E, YWHAG]
R-HSA:3858494	Beta-catenin independent WNT signaling	REACTOME_Pathways_25.05.2022	7.61967e-05	0.0067815	1.06329e-23	3.61518e-22	[-1]	Group33	4.10959	6	[KRAS, RAC1, RAC3, RHOA, RPS27A, UBA52]
R-HSA:389359	CD28 dependent Vav1 pathway	REACTOME_Pathways_25.05.2022	2.45225e-07	5.98348e-05	1.06329e-23	3.61518e-22	[-1]	Group33	33.3333	4	[CDC42, FYN, LCK, RAC1]
R-HSA:389958	Cooperation of Prefoldin and TriC/CCT in actin and tubulin folding	REACTOME_Pathways_25.05.2022	0.000488682	0.0234567	1.06329e-23	3.61518e-22	[-1]	Group33	9.375	3	[TUBA3C, TUBA3D, TUBA3E]
R-HSA:389960	Formation of tubulin folding intermediates by CCT/TriC	REACTOME_Pathways_25.05.2022	0.000232224	0.0153268	1.06329e-23	3.61518e-22	[-1]	Group33	12	3	[TUBA3C, TUBA3D, TUBA3E]
R-HSA:389977	Post-chaperonin tubulin folding pathway	REACTOME_Pathways_25.05.2022	0.000157131	0.0114706	1.06329e-23	3.61518e-22	[-1]	Group33	13.6364	3	[TUBA3C, TUBA3D, TUBA3E]
R-HSA:400253	Circadian Clock	REACTOME_Pathways_25.05.2022	0.00472485	0.0236243	1.06329e-23	3.61518e-22	[-1]	Group33	4.28571	3	[PPP1CA, RPS27A, UBA52]
R-HSA:4086400	PCP/CE pathway	REACTOME_Pathways_25.05.2022	8.33852e-05	0.00717113	1.06329e-23	3.61518e-22	[-1]	Group33	5.43478	5	[RAC1, RAC3, RHOA, RPS27A, UBA52]
R-HSA:418885	DCC mediated attractive signaling	REACTOME_Pathways_25.05.2022	3.81963e-05	0.00401061	1.06329e-23	3.61518e-22	[-1]	Group33	21.4286	3	[CDC42, FYN, RAC1]
R-HSA:437239	Recycling pathway of L1	REACTOME_Pathways_25.05.2022	0.00151609	0.0348701	1.06329e-23	3.61518e-22	[-1]	Group33	6.38298	3	[TUBA3C, TUBA3D, TUBA3E]
R-HSA:438064	Post NMDA receptor activation events	REACTOME_Pathways_25.05.2022	1.16915e-07	3.0281e-05	1.06329e-23	3.61518e-22	[-1]	Group33	8.75	7	[HRAS, KRAS, NRAS, RAC1, TUBA3C, TUBA3D, TUBA3E]
R-HSA:4420097	VEGFA-VEGFR2 Pathway	REACTOME_Pathways_25.05.2022	5.08557e-07	0.000114425	1.06329e-23	3.61518e-22	[-1]	Group33	7.07071	7	[CDC42, FYN, HRAS, KRAS, NRAS, RAC1, RHOA]
R-HSA:442755	Activation of NMDA receptors and postsynaptic events	REACTOME_Pathways_25.05.2022	3.31334e-07	7.81947e-05	1.06329e-23	3.61518e-22	[-1]	Group33	7.52688	7	[HRAS, KRAS, NRAS, RAC1, TUBA3C, TUBA3D, TUBA3E]
R-HSA:448424	Interleukin-17 signaling	REACTOME_Pathways_25.05.2022	0.00511222	0.0153367	1.06329e-23	3.61518e-22	[-1]	Group33	4.16667	3	[PPP2CA, RPS27A, UBA52]
R-HSA:450294	MAP kinase activation	REACTOME_Pathways_25.05.2022	0.00367187	0.0330468	1.06329e-23	3.61518e-22	[-1]	Group33	4.6875	3	[PPP2CA, RPS27A, UBA52]
R-HSA:450531	Regulation of mRNA stability by proteins that bind AU-rich elements	REACTOME_Pathways_25.05.2022	0.000872685	0.0314167	1.06329e-23	3.61518e-22	[-1]	Group33	4.54545	4	[RPS27A, UBA52, YWHAB, YWHAZ]
R-HSA:453274	Mitotic G2-G2/M phases	REACTOME_Pathways_25.05.2022	4.94191e-07	0.000111687	1.06329e-23	3.61518e-22	[-1]	Group33	4.54545	9	[CDK1, CDK2, PPP2CA, RPS27A, TUBA3C, TUBA3D, TUBA3E, UBA52, YWHAG]
R-HSA:453276	Regulation of mitotic cell cycle	REACTOME_Pathways_25.05.2022	0.000872685	0.0314167	1.06329e-23	3.61518e-22	[-1]	Group33	4.54545	4	[CDK1, CDK2, RPS27A, UBA52]
R-HSA:453279	Mitotic G1 phase and G1/S transition	REACTOME_Pathways_25.05.2022	6.2674e-07	0.000137883	1.06329e-23	3.61518e-22	[-1]	Group33	5.36913	8	[CDK1, CDK2, CDK4, CDK6, LYN, PPP2CA, RPS27A, UBA52]
R-HSA:512988	Interleukin-3, Interleukin-5 and GM-CSF signaling	REACTOME_Pathways_25.05.2022	3.07238e-09	9.67799e-07	1.06329e-23	3.61518e-22	[-1]	Group33	14.5833	7	[FYN, HCK, LYN, RPS27A, UBA52, YES1, YWHAZ]
R-HSA:5621481	C-type lectin receptors (CLRs)	REACTOME_Pathways_25.05.2022	5.73729e-06	0.000900755	1.06329e-23	3.61518e-22	[-1]	Group33	4.92958	7	[FYN, HRAS, KRAS, LYN, NRAS, RPS27A, UBA52]
R-HSA:5625740	RHO GTPases activate PKNs	REACTOME_Pathways_25.05.2022	8.48993e-16	3.26013e-13	1.06329e-23	3.61518e-22	[-1]	Group33	13.6842	13	[H2AC6, H2AC7, H2AJ, H2AX, H3-3A, H3C14, RAC1, RHOA, SFN, YWHAB, YWHAG, YWHAH, YWHAZ]
R-HSA:5625970	RHO GTPases activate KTN1	REACTOME_Pathways_25.05.2022	1.74975e-05	0.00220468	1.06329e-23	3.61518e-22	[-1]	Group33	27.2727	3	[CDC42, RAC1, RHOA]
R-HSA:5626467	RHO GTPases activate IQGAPs	REACTOME_Pathways_25.05.2022	4.2912e-07	9.99849e-05	1.06329e-23	3.61518e-22	[-1]	Group33	15.625	5	[CDC42, RAC1, TUBA3C, TUBA3D, TUBA3E]
R-HSA:5628897	TP53 Regulates Metabolic Genes	REACTOME_Pathways_25.05.2022	6.38546e-05	0.00593848	1.06329e-23	3.61518e-22	[-1]	Group33	5.74713	5	[SFN, YWHAB, YWHAG, YWHAH, YWHAZ]
R-HSA:5637815	Signaling by Ligand-Responsive EGFR Variants in Cancer	REACTOME_Pathways_25.05.2022	2.60397e-08	7.4213e-06	1.06329e-23	3.61518e-22	[-1]	Group33	26.3158	5	[HRAS, KRAS, NRAS, RPS27A, UBA52]
R-HSA:5654726	Negative regulation of FGFR1 signaling	REACTOME_Pathways_25.05.2022	1.87553e-05	0.00232566	1.06329e-23	3.61518e-22	[-1]	Group33	12.1212	4	[FGFR1, PPP2CA, RPS27A, UBA52]
R-HSA:5654727	Negative regulation of FGFR2 signaling	REACTOME_Pathways_25.05.2022	2.11776e-05	0.00256249	1.06329e-23	3.61518e-22	[-1]	Group33	11.7647	4	[FGFR2, PPP2CA, RPS27A, UBA52]
R-HSA:5654732	Negative regulation of FGFR3 signaling	REACTOME_Pathways_25.05.2022	1.10483e-05	0.00152467	1.06329e-23	3.61518e-22	[-1]	Group33	13.7931	4	[FGFR3, PPP2CA, RPS27A, UBA52]
R-HSA:5654733	Negative regulation of FGFR4 signaling	REACTOME_Pathways_25.05.2022	1.45288e-05	0.00188874	1.06329e-23	3.61518e-22	[-1]	Group33	12.9032	4	[FGFR4, PPP2CA, RPS27A, UBA52]
R-HSA:5654736	Signaling by FGFR1	REACTOME_Pathways_25.05.2022	4.13536e-09	1.29023e-06	1.06329e-23	3.61518e-22	[-1]	Group33	14	7	[FGFR1, HRAS, KRAS, NRAS, PPP2CA, RPS27A, UBA52]
R-HSA:5654738	Signaling by FGFR2	REACTOME_Pathways_25.05.2022	6.16357e-08	1.67649e-05	1.06329e-23	3.61518e-22	[-1]	Group33	9.58904	7	[FGFR2, HRAS, KRAS, NRAS, PPP2CA, RPS27A, UBA52]
R-HSA:5654741	Signaling by FGFR3	REACTOME_Pathways_25.05.2022	8.02773e-10	2.67323e-07	1.06329e-23	3.61518e-22	[-1]	Group33	17.5	7	[FGFR3, HRAS, KRAS, NRAS, PPP2CA, RPS27A, UBA52]
R-HSA:5654743	Signaling by FGFR4	REACTOME_Pathways_25.05.2022	9.64257e-10	3.19169e-07	1.06329e-23	3.61518e-22	[-1]	Group33	17.0732	7	[FGFR4, HRAS, KRAS, NRAS, PPP2CA, RPS27A, UBA52]
R-HSA:5658442	Regulation of RAS by GAPs	REACTOME_Pathways_25.05.2022	1.93647e-05	0.00238186	1.06329e-23	3.61518e-22	[-1]	Group33	7.35294	5	[HRAS, KRAS, NRAS, RPS27A, UBA52]
R-HSA:5663220	RHO GTPases Activate Formins	REACTOME_Pathways_25.05.2022	5.22445e-06	0.000841136	1.06329e-23	3.61518e-22	[-1]	Group33	5	7	[CDC42, PPP2CA, RAC1, RHOA, TUBA3C, TUBA3D, TUBA3E]
R-HSA:5673001	RAF/MAP kinase cascade	REACTOME_Pathways_25.05.2022	9.28905e-10	3.08396e-07	1.06329e-23	3.61518e-22	[-1]	Group33	4.64286	13	[FGFR1, FGFR2, FGFR3, FGFR4, FYN, HRAS, KRAS, NRAS, PPP2CA, RPS27A, TEK, UBA52, YWHAB]
R-HSA:5675221	Negative regulation of MAPK pathway	REACTOME_Pathways_25.05.2022	1.37129e-09	4.47041e-07	1.06329e-23	3.61518e-22	[-1]	Group33	16.2791	7	[HRAS, KRAS, NRAS, PPP2CA, RPS27A, UBA52, YWHAB]
R-HSA:5683057	MAPK family signaling cascades	REACTOME_Pathways_25.05.2022	2.74512e-13	1.02118e-10	1.06329e-23	3.61518e-22	[-1]	Group33	5.23077	17	[CDC42, CDK1, FGFR1, FGFR2, FGFR3, FGFR4, FYN, HRAS, KRAS, NRAS, PPP2CA, RAC1, RPS27A, SEPTIN7, TEK, UBA52, YWHAB]
R-HSA:5684996	MAPK1/MAPK3 signaling	REACTOME_Pathways_25.05.2022	9.9146e-11	3.50977e-08	1.06329e-23	3.61518e-22	[-1]	Group33	4.8951	14	[CDK1, FGFR1, FGFR2, FGFR3, FGFR4, FYN, HRAS, KRAS, NRAS, PPP2CA, RPS27A, TEK, UBA52, YWHAB]
R-HSA:5687128	MAPK6/MAPK4 signaling	REACTOME_Pathways_25.05.2022	4.55471e-06	0.000760637	1.06329e-23	3.61518e-22	[-1]	Group33	6.74157	6	[CDC42, CDK1, RAC1, RPS27A, SEPTIN7, UBA52]
R-HSA:5689896	Ovarian tumor domain proteases	REACTOME_Pathways_25.05.2022	3.68721e-05	0.00394531	1.06329e-23	3.61518e-22	[-1]	Group33	10.2564	4	[CDK1, RHOA, RPS27A, UBA52]
R-HSA:5693565	Recruitment and ATM-mediated phosphorylation of repair and signaling proteins at DNA double strand breaks	REACTOME_Pathways_25.05.2022	0.000527346	0.0247852	1.06329e-23	3.61518e-22	[-1]	Group33	5.19481	4	[H2AX, H3-4, RPS27A, UBA52]
R-HSA:5693606	DNA Double Strand Break Response	REACTOME_Pathways_25.05.2022	0.00055381	0.0254753	1.06329e-23	3.61518e-22	[-1]	Group33	5.12821	4	[H2AX, H3-4, RPS27A, UBA52]
R-HSA:5693607	Processing of DNA double-strand break ends	REACTOME_Pathways_25.05.2022	0.000107219	0.00857751	1.06329e-23	3.61518e-22	[-1]	Group33	5.15464	5	[CDK2, H2AX, H3-4, RPS27A, UBA52]
R-HSA:6791312	TP53 Regulates Transcription of Cell Cycle Genes	REACTOME_Pathways_25.05.2022	0.00161154	0.0354539	1.06329e-23	3.61518e-22	[-1]	Group33	6.25	3	[CDK1, CDK2, SFN]
R-HSA:6804756	Regulation of TP53 Activity through Phosphorylation	REACTOME_Pathways_25.05.2022	0.00103043	0.0319435	1.06329e-23	3.61518e-22	[-1]	Group33	4.34783	4	[CDK2, CDK5, RPS27A, UBA52]
R-HSA:6804757	Regulation of TP53 Degradation	REACTOME_Pathways_25.05.2022	7.91176e-07	0.000168521	1.06329e-23	3.61518e-22	[-1]	Group33	13.8889	5	[CDK1, CDK2, PPP2CA, RPS27A, UBA52]
R-HSA:6806003	Regulation of TP53 Expression and Degradation	REACTOME_Pathways_25.05.2022	9.11314e-07	0.000189553	1.06329e-23	3.61518e-22	[-1]	Group33	13.5135	5	[CDK1, CDK2, PPP2CA, RPS27A, UBA52]
R-HSA:6806834	Signaling by MET	REACTOME_Pathways_25.05.2022	2.26483e-06	0.000412198	1.06329e-23	3.61518e-22	[-1]	Group33	7.59494	6	[HRAS, KRAS, NRAS, RAC1, RPS27A, UBA52]
R-HSA:6811436	COPI-independent Golgi-to-ER retrograde traffic	REACTOME_Pathways_25.05.2022	0.00192018	0.0364835	1.06329e-23	3.61518e-22	[-1]	Group33	5.88235	3	[TUBA3C, TUBA3D, TUBA3E]
R-HSA:68867	Assembly of the pre-replicative complex	REACTOME_Pathways_25.05.2022	4.58155e-07	0.000104918	1.06329e-23	3.61518e-22	[-1]	Group33	5.59441	8	[H2AC6, H2AC7, H2AJ, H2AX, H3-3A, H3C14, RPS27A, UBA52]
R-HSA:68949	Orc1 removal from chromatin	REACTOME_Pathways_25.05.2022	0.00491623	0.0196649	1.06329e-23	3.61518e-22	[-1]	Group33	4.22535	3	[CDK2, RPS27A, UBA52]
R-HSA:69002	DNA Replication Pre-Initiation	REACTOME_Pathways_25.05.2022	8.06953e-08	2.1465e-05	1.06329e-23	3.61518e-22	[-1]	Group33	5.625	9	[CDK2, H2AC6, H2AC7, H2AJ, H2AX, H3-3A, H3C14, RPS27A, UBA52]
R-HSA:69017	CDK-mediated phosphorylation and removal of Cdc6	REACTOME_Pathways_25.05.2022	0.00531287	0.0106257	1.06329e-23	3.61518e-22	[-1]	Group33	4.10959	3	[CDK2, RPS27A, UBA52]
R-HSA:69202	Cyclin E associated events during G1/S transition	REACTOME_Pathways_25.05.2022	0.000700461	0.0287189	1.06329e-23	3.61518e-22	[-1]	Group33	4.81928	4	[CDK2, CDK4, RPS27A, UBA52]
R-HSA:69206	G1/S Transition	REACTOME_Pathways_25.05.2022	4.16294e-05	0.0042462	1.06329e-23	3.61518e-22	[-1]	Group33	4.58015	6	[CDK1, CDK2, CDK4, PPP2CA, RPS27A, UBA52]
R-HSA:69231	Cyclin D associated events in G1	REACTOME_Pathways_25.05.2022	2.63464e-09	8.32547e-07	1.06329e-23	3.61518e-22	[-1]	Group33	14.8936	7	[CDK2, CDK4, CDK6, LYN, PPP2CA, RPS27A, UBA52]
R-HSA:69236	G1 Phase	REACTOME_Pathways_25.05.2022	2.63464e-09	8.32547e-07	1.06329e-23	3.61518e-22	[-1]	Group33	14.8936	7	[CDK2, CDK4, CDK6, LYN, PPP2CA, RPS27A, UBA52]
R-HSA:69273	Cyclin A/B1/B2 associated events during G2/M transition	REACTOME_Pathways_25.05.2022	0.000232224	0.0153268	1.06329e-23	3.61518e-22	[-1]	Group33	12	3	[CDK1, CDK2, PPP2CA]
R-HSA:69275	G2/M Transition	REACTOME_Pathways_25.05.2022	4.5375e-07	0.000104362	1.06329e-23	3.61518e-22	[-1]	Group33	4.59184	9	[CDK1, CDK2, PPP2CA, RPS27A, TUBA3C, TUBA3D, TUBA3E, UBA52, YWHAG]
R-HSA:69306	DNA Replication	REACTOME_Pathways_25.05.2022	3.19278e-07	7.59881e-05	1.06329e-23	3.61518e-22	[-1]	Group33	4.78723	9	[CDK2, H2AC6, H2AC7, H2AJ, H2AX, H3-3A, H3C14, RPS27A, UBA52]
R-HSA:69473	G2/M DNA damage checkpoint	REACTOME_Pathways_25.05.2022	1.74134e-08	5.0673e-06	1.06329e-23	3.61518e-22	[-1]	Group33	8.51064	8	[CDK1, H2AX, H3-4, SFN, YWHAB, YWHAG, YWHAH, YWHAZ]
R-HSA:69481	G2/M Checkpoints	REACTOME_Pathways_25.05.2022	5.03841e-10	1.7181e-07	1.06329e-23	3.61518e-22	[-1]	Group33	6.58683	11	[CDK1, CDK2, H2AX, H3-4, RPS27A, SFN, UBA52, YWHAB, YWHAG, YWHAH, YWHAZ]
R-HSA:69563	p53-Dependent G1 DNA Damage Response	REACTOME_Pathways_25.05.2022	0.00400495	0.0320396	1.06329e-23	3.61518e-22	[-1]	Group33	4.54545	3	[CDK2, RPS27A, UBA52]
R-HSA:69580	p53-Dependent G1/S DNA damage checkpoint	REACTOME_Pathways_25.05.2022	0.00400495	0.0320396	1.06329e-23	3.61518e-22	[-1]	Group33	4.54545	3	[CDK2, RPS27A, UBA52]
R-HSA:69615	G1/S DNA Damage Checkpoints	REACTOME_Pathways_25.05.2022	0.00435585	0.0261351	1.06329e-23	3.61518e-22	[-1]	Group33	4.41176	3	[CDK2, RPS27A, UBA52]
R-HSA:69620	Cell Cycle Checkpoints	REACTOME_Pathways_25.05.2022	1.74567e-08	5.06243e-06	1.06329e-23	3.61518e-22	[-1]	Group33	4.09556	12	[CDK1, CDK2, H2AX, H3-4, PPP2CA, RPS27A, SFN, UBA52, YWHAB, YWHAG, YWHAH, YWHAZ]
R-HSA:69656	Cyclin A:Cdk2-associated events at S phase entry	REACTOME_Pathways_25.05.2022	0.000766152	0.0291138	1.06329e-23	3.61518e-22	[-1]	Group33	4.70588	4	[CDK2, CDK4, RPS27A, UBA52]
R-HSA:73884	Base Excision Repair	REACTOME_Pathways_25.05.2022	8.33852e-05	0.00717113	1.06329e-23	3.61518e-22	[-1]	Group33	5.43478	5	[H2AC6, H2AC7, H2AJ, H2AX, H3-4]
R-HSA:73886	Chromosome Maintenance	REACTOME_Pathways_25.05.2022	5.47587e-06	0.00087614	1.06329e-23	3.61518e-22	[-1]	Group33	4.96454	7	[CDK2, H2AC6, H2AC7, H2AJ, H2AX, H3-3A, H3-4]
R-HSA:73927	Depurination	REACTOME_Pathways_25.05.2022	7.42785e-06	0.00109932	1.06329e-23	3.61518e-22	[-1]	Group33	8.92857	5	[H2AC6, H2AC7, H2AJ, H2AX, H3-4]
R-HSA:73928	Depyrimidination	REACTOME_Pathways_25.05.2022	1.13502e-05	0.00154362	1.06329e-23	3.61518e-22	[-1]	Group33	8.19672	5	[H2AC6, H2AC7, H2AJ, H2AX, H3-4]
R-HSA:73929	Base-Excision Repair, AP Site Formation	REACTOME_Pathways_25.05.2022	1.33083e-05	0.00174339	1.06329e-23	3.61518e-22	[-1]	Group33	7.93651	5	[H2AC6, H2AC7, H2AJ, H2AX, H3-4]
R-HSA:75035	Chk1/Chk2(Cds1) mediated inactivation of Cyclin B:Cdk1 complex	REACTOME_Pathways_25.05.2022	1.80681e-11	6.5045e-09	1.06329e-23	3.61518e-22	[-1]	Group33	46.1538	6	[CDK1, SFN, YWHAB, YWHAG, YWHAH, YWHAZ]
R-HSA:75815	Ubiquitin-dependent degradation of Cyclin D	REACTOME_Pathways_25.05.2022	0.00203066	0.0365519	1.06329e-23	3.61518e-22	[-1]	Group33	5.76923	3	[CDK4, RPS27A, UBA52]
R-HSA:8848021	Signaling by PTK6	REACTOME_Pathways_25.05.2022	4.33241e-12	1.58566e-09	1.06329e-23	3.61518e-22	[-1]	Group33	16.6667	9	[CDK2, CDK4, HRAS, KRAS, NRAS, RAC1, RHOA, RPS27A, UBA52]
R-HSA:8849471	PTK6 Regulates RHO GTPases, RAS GTPase and MAP kinases	REACTOME_Pathways_25.05.2022	4.56974e-09	1.42119e-06	1.06329e-23	3.61518e-22	[-1]	Group33	35.7143	5	[HRAS, KRAS, NRAS, RAC1, RHOA]
R-HSA:8852276	The role of GTSE1 in G2/M progression after G2 checkpoint	REACTOME_Pathways_25.05.2022	1.94688e-06	0.000362119	1.06329e-23	3.61518e-22	[-1]	Group33	7.79221	6	[CDK1, RPS27A, TUBA3C, TUBA3D, TUBA3E, UBA52]
R-HSA:8878166	Transcriptional regulation by RUNX2	REACTOME_Pathways_25.05.2022	0.000301939	0.0175124	1.06329e-23	3.61518e-22	[-1]	Group33	4.13223	5	[CDK1, CDK4, RPS27A, UBA52, YES1]
R-HSA:8939236	RUNX1 regulates transcription of genes involved in differentiation of HSCs	REACTOME_Pathways_25.05.2022	2.20446e-07	5.48911e-05	1.06329e-23	3.61518e-22	[-1]	Group33	6.15385	8	[H2AC6, H2AC7, H2AJ, H2AX, H3-3A, H3C14, RPS27A, UBA52]
R-HSA:8955332	Carboxyterminal post-translational modifications of tubulin	REACTOME_Pathways_25.05.2022	0.00109225	0.0316752	1.06329e-23	3.61518e-22	[-1]	Group33	7.14286	3	[TUBA3C, TUBA3D, TUBA3E]
R-HSA:8982491	Glycogen metabolism	REACTOME_Pathways_25.05.2022	1.10483e-05	0.00152467	1.06329e-23	3.61518e-22	[-1]	Group33	13.7931	4	[PYGB, PYGM, RPS27A, UBA52]
R-HSA:9006335	Signaling by Erythropoietin	REACTOME_Pathways_25.05.2022	5.97221e-06	0.000925692	1.06329e-23	3.61518e-22	[-1]	Group33	16	4	[HRAS, KRAS, LYN, NRAS]
R-HSA:9006927	Signaling by Non-Receptor Tyrosine Kinases	REACTOME_Pathways_25.05.2022	4.33241e-12	1.58566e-09	1.06329e-23	3.61518e-22	[-1]	Group33	16.6667	9	[CDK2, CDK4, HRAS, KRAS, NRAS, RAC1, RHOA, RPS27A, UBA52]
R-HSA:9006936	Signaling by TGFB family members	REACTOME_Pathways_25.05.2022	0.000268786	0.0166647	1.06329e-23	3.61518e-22	[-1]	Group33	4.23729	5	[CDK9, PPP1CA, RHOA, RPS27A, UBA52]
R-HSA:9027284	Erythropoietin activates RAS	REACTOME_Pathways_25.05.2022	4.92236e-07	0.000111738	1.06329e-23	3.61518e-22	[-1]	Group33	28.5714	4	[HRAS, KRAS, LYN, NRAS]
R-HSA:912631	Regulation of signaling by CBL	REACTOME_Pathways_25.05.2022	7.58591e-10	2.54128e-07	1.06329e-23	3.61518e-22	[-1]	Group33	27.2727	6	[FYN, HCK, LYN, RPS27A, UBA52, YES1]
R-HSA:917937	Iron uptake and transport	REACTOME_Pathways_25.05.2022	0.00277664	0.0360963	1.06329e-23	3.61518e-22	[-1]	Group33	5.17241	3	[ATP6V1B2, RPS27A, UBA52]
R-HSA:9604323	Negative regulation of NOTCH4 signaling	REACTOME_Pathways_25.05.2022	0.00226331	0.0384763	1.06329e-23	3.61518e-22	[-1]	Group33	5.55556	3	[RPS27A, UBA52, YWHAZ]
R-HSA:9607240	FLT3 Signaling	REACTOME_Pathways_25.05.2022	9.54158e-12	3.47313e-09	1.06329e-23	3.61518e-22	[-1]	Group33	21.0526	8	[FYN, HCK, HRAS, KRAS, LCK, NRAS, RPS27A, UBA52]
R-HSA:9609646	HCMV Infection	REACTOME_Pathways_25.05.2022	1.70486e-11	6.15453e-09	1.06329e-23	3.61518e-22	[-1]	Group33	7.5	12	[H2AC12, H2AC13, H2AC15, H2AC21, H2AC6, H2AC7, H2AW, H3C14, TPR, TUBA3C, TUBA3D, TUBA3E]
R-HSA:9609690	HCMV Early Events	REACTOME_Pathways_25.05.2022	2.25873e-12	8.31211e-10	1.06329e-23	3.61518e-22	[-1]	Group33	8.88889	12	[H2AC12, H2AC13, H2AC15, H2AC21, H2AC6, H2AC7, H2AW, H3C14, TPR, TUBA3C, TUBA3D, TUBA3E]
R-HSA:9609736	Assembly and cell surface presentation of NMDA receptors	REACTOME_Pathways_25.05.2022	0.00101778	0.0325688	1.06329e-23	3.61518e-22	[-1]	Group33	7.31707	3	[TUBA3C, TUBA3D, TUBA3E]
R-HSA:9614085	FOXO-mediated transcription	REACTOME_Pathways_25.05.2022	0.000275745	0.0168205	1.06329e-23	3.61518e-22	[-1]	Group33	6.15385	4	[SFN, YWHAB, YWHAG, YWHAZ]
R-HSA:9614399	Regulation of localization of FOXO transcription factors	REACTOME_Pathways_25.05.2022	1.6409e-07	4.1843e-05	1.06329e-23	3.61518e-22	[-1]	Group33	36.3636	4	[SFN, YWHAB, YWHAG, YWHAZ]
R-HSA:9619483	Activation of AMPK downstream of NMDARs	REACTOME_Pathways_25.05.2022	0.000363805	0.0196455	1.06329e-23	3.61518e-22	[-1]	Group33	10.3448	3	[TUBA3C, TUBA3D, TUBA3E]
R-HSA:9646399	Aggrephagy	REACTOME_Pathways_25.05.2022	1.96693e-06	0.000363882	1.06329e-23	3.61518e-22	[-1]	Group33	11.6279	5	[RPS27A, TUBA3C, TUBA3D, TUBA3E, UBA52]
R-HSA:9648002	RAS processing	REACTOME_Pathways_25.05.2022	1.75346e-07	4.43625e-05	1.06329e-23	3.61518e-22	[-1]	Group33	18.5185	5	[HRAS, KRAS, NRAS, RPS27A, UBA52]
R-HSA:9659787	Aberrant regulation of mitotic G1/S transition in cancer due to RB1 defects	REACTOME_Pathways_25.05.2022	7.06089e-05	0.00649602	1.06329e-23	3.61518e-22	[-1]	Group33	17.6471	3	[CDK2, CDK4, CDK6]
R-HSA:9661069	Defective binding of RB1 mutants to E2F1,(E2F2, E2F3)	REACTOME_Pathways_25.05.2022	7.06089e-05	0.00649602	1.06329e-23	3.61518e-22	[-1]	Group33	17.6471	3	[CDK2, CDK4, CDK6]
R-HSA:9663891	Selective autophagy	REACTOME_Pathways_25.05.2022	4.52996e-05	0.00457525	1.06329e-23	3.61518e-22	[-1]	Group33	6.17284	5	[RPS27A, TUBA3C, TUBA3D, TUBA3E, UBA52]
R-HSA:9664323	FCGR3A-mediated IL10 synthesis	REACTOME_Pathways_25.05.2022	1.36002e-06	0.000266563	1.06329e-23	3.61518e-22	[-1]	Group33	12.5	5	[FGR, FYN, HCK, LYN, YES1]
R-HSA:9668328	Sealing of the nuclear envelope (NE) by ESCRT-III	REACTOME_Pathways_25.05.2022	0.000444419	0.022221	1.06329e-23	3.61518e-22	[-1]	Group33	9.67742	3	[TUBA3C, TUBA3D, TUBA3E]
R-HSA:9674555	Signaling by CSF3 (G-CSF)	REACTOME_Pathways_25.05.2022	3.05999e-07	7.34397e-05	1.06329e-23	3.61518e-22	[-1]	Group33	16.6667	5	[HCK, KRAS, LYN, RPS27A, UBA52]
R-HSA:9675126	Diseases of mitotic cell cycle	REACTOME_Pathways_25.05.2022	0.000813914	0.0301148	1.06329e-23	3.61518e-22	[-1]	Group33	7.89474	3	[CDK2, CDK4, CDK6]
R-HSA:9682385	FLT3 signaling in disease	REACTOME_Pathways_25.05.2022	2.12651e-07	5.31628e-05	1.06329e-23	3.61518e-22	[-1]	Group33	17.8571	5	[HRAS, KRAS, NRAS, RPS27A, UBA52]
R-HSA:9687139	Aberrant regulation of mitotic cell cycle due to RB1 defects	REACTOME_Pathways_25.05.2022	0.000693702	0.0291355	1.06329e-23	3.61518e-22	[-1]	Group33	8.33333	3	[CDK2, CDK4, CDK6]
R-HSA:9705462	Inactivation of CSF3 (G-CSF) signaling	REACTOME_Pathways_25.05.2022	5.97221e-06	0.000925692	1.06329e-23	3.61518e-22	[-1]	Group33	16	4	[HCK, LYN, RPS27A, UBA52]
R-HSA:9705683	SARS-CoV-2-host interactions	REACTOME_Pathways_25.05.2022	5.84538e-07	0.000130352	1.06329e-23	3.61518e-22	[-1]	Group33	4.45545	9	[RPS27A, RPS9, SFN, TPR, UBA52, YWHAB, YWHAG, YWHAH, YWHAZ]
R-HSA:9755779	SARS-CoV-2 targets host intracellular signalling and regulatory pathways	REACTOME_Pathways_25.05.2022	1.82168e-09	5.81116e-07	1.06329e-23	3.61518e-22	[-1]	Group33	41.6667	5	[SFN, YWHAB, YWHAG, YWHAH, YWHAZ]
R-HSA:977225	Amyloid fiber formation	REACTOME_Pathways_25.05.2022	1.10692e-06	0.000223597	1.06329e-23	3.61518e-22	[-1]	Group33	6.30631	7	[H2AC6, H2AC7, H2AX, H3-3A, H3C14, RPS27A, UBA52]
R-HSA:983189	Kinesins	REACTOME_Pathways_25.05.2022	0.00291524	0.0349828	1.06329e-23	3.61518e-22	[-1]	Group33	5.08475	3	[TUBA3C, TUBA3D, TUBA3E]
R-HSA:983231	Factors involved in megakaryocyte development and platelet production	REACTOME_Pathways_25.05.2022	1.22642e-07	3.16416e-05	1.06329e-23	3.61518e-22	[-1]	Group33	5.35714	9	[CDC42, CDK2, CDK5, H3-3A, H3C14, RAC1, TUBA3C, TUBA3D, TUBA3E]
R-HSA:983705	Signaling by the B Cell Receptor (BCR)	REACTOME_Pathways_25.05.2022	6.9285e-08	1.86377e-05	1.06329e-23	3.61518e-22	[-1]	Group33	7.14286	8	[BLK, FYN, HRAS, KRAS, LYN, NRAS, RPS27A, UBA52]
R-HSA:109606	Intrinsic Pathway for Apoptosis	REACTOME_Pathways_25.05.2022	6.79048e-06	0.00101857	8.38942e-20	2.76851e-18	[-1]	Group34	9.09091	5	[SFN, YWHAB, YWHAG, YWHAH, YWHAZ]
R-HSA:110328	Recognition and association of DNA glycosylase with site containing an affected pyrimidine	REACTOME_Pathways_25.05.2022	1.13502e-05	0.00154362	8.38942e-20	2.76851e-18	[-1]	Group34	8.19672	5	[H2AC6, H2AC7, H2AJ, H2AX, H3-4]
R-HSA:110329	Cleavage of the damaged pyrimidine	REACTOME_Pathways_25.05.2022	1.13502e-05	0.00154362	8.38942e-20	2.76851e-18	[-1]	Group34	8.19672	5	[H2AC6, H2AC7, H2AJ, H2AX, H3-4]
R-HSA:110330	Recognition and association of DNA glycosylase with site containing an affected purine	REACTOME_Pathways_25.05.2022	7.42785e-06	0.00109932	8.38942e-20	2.76851e-18	[-1]	Group34	8.92857	5	[H2AC6, H2AC7, H2AJ, H2AX, H3-4]
R-HSA:110331	Cleavage of the damaged purine	REACTOME_Pathways_25.05.2022	7.42785e-06	0.00109932	8.38942e-20	2.76851e-18	[-1]	Group34	8.92857	5	[H2AC6, H2AC7, H2AJ, H2AX, H3-4]
R-HSA:111447	Activation of BAD and translocation to mitochondria	REACTOME_Pathways_25.05.2022	6.82847e-09	2.08268e-06	8.38942e-20	2.76851e-18	[-1]	Group34	33.3333	5	[SFN, YWHAB, YWHAG, YWHAH, YWHAZ]
R-HSA:112412	SOS-mediated signalling	REACTOME_Pathways_25.05.2022	3.76409e-06	0.000639895	8.38942e-20	2.76851e-18	[-1]	Group34	42.8571	3	[HRAS, KRAS, NRAS]
R-HSA:114452	Activation of BH3-only proteins	REACTOME_Pathways_25.05.2022	3.05999e-07	7.34397e-05	8.38942e-20	2.76851e-18	[-1]	Group34	16.6667	5	[SFN, YWHAB, YWHAG, YWHAH, YWHAZ]
R-HSA:1169092	Activation of RAS in B cells	REACTOME_Pathways_25.05.2022	1.08304e-06	0.00022094	8.38942e-20	2.76851e-18	[-1]	Group34	60	3	[HRAS, KRAS, NRAS]
R-HSA:1221632	Meiotic synapsis	REACTOME_Pathways_25.05.2022	4.01511e-05	0.00417572	8.38942e-20	2.76851e-18	[-1]	Group34	6.32911	5	[H2AC6, H2AC7, H2AJ, H2AX, H3-4]
R-HSA:1227990	Signaling by ERBB2 in Cancer	REACTOME_Pathways_25.05.2022	0.000261597	0.0164806	8.38942e-20	2.76851e-18	[-1]	Group34	11.5385	3	[HRAS, KRAS, NRAS]
R-HSA:1250196	SHC1 events in ERBB2 signaling	REACTOME_Pathways_25.05.2022	0.000157131	0.0114706	8.38942e-20	2.76851e-18	[-1]	Group34	13.6364	3	[HRAS, KRAS, NRAS]
R-HSA:1250347	SHC1 events in ERBB4 signaling	REACTOME_Pathways_25.05.2022	3.81963e-05	0.00401061	8.38942e-20	2.76851e-18	[-1]	Group34	21.4286	3	[HRAS, KRAS, NRAS]
R-HSA:1445148	Translocation of SLC2A4 (GLUT4) to the plasma membrane	REACTOME_Pathways_25.05.2022	6.45783e-11	2.29253e-08	8.38942e-20	2.76851e-18	[-1]	Group34	12.5	9	[RAC1, SFN, TUBA3C, TUBA3D, TUBA3E, YWHAB, YWHAG, YWHAH, YWHAZ]
R-HSA:1474165	Reproduction	REACTOME_Pathways_25.05.2022	3.05426e-08	8.6741e-06	8.38942e-20	2.76851e-18	[-1]	Group34	6.29371	9	[CDK2, CDK4, H2AC6, H2AC7, H2AJ, H2AX, H3-3A, H3-4, H3C14]
R-HSA:1500620	Meiosis	REACTOME_Pathways_25.05.2022	5.65595e-09	1.74203e-06	8.38942e-20	2.76851e-18	[-1]	Group34	7.62712	9	[CDK2, CDK4, H2AC6, H2AC7, H2AJ, H2AX, H3-3A, H3-4, H3C14]
R-HSA:157579	Telomere Maintenance	REACTOME_Pathways_25.05.2022	1.24885e-06	0.000248522	8.38942e-20	2.76851e-18	[-1]	Group34	6.19469	7	[CDK2, H2AC6, H2AC7, H2AJ, H2AX, H3-3A, H3-4]
R-HSA:167044	Signalling to RAS	REACTOME_Pathways_25.05.2022	0.000117136	0.00901944	8.38942e-20	2.76851e-18	[-1]	Group34	15	3	[HRAS, KRAS, NRAS]
R-HSA:171007	p38MAPK events	REACTOME_Pathways_25.05.2022	3.01168e-05	0.00334297	8.38942e-20	2.76851e-18	[-1]	Group34	23.0769	3	[HRAS, KRAS, NRAS]
R-HSA:171306	Packaging Of Telomere Ends	REACTOME_Pathways_25.05.2022	5.13146e-06	0.000836427	8.38942e-20	2.76851e-18	[-1]	Group34	9.61539	5	[H2AC6, H2AC7, H2AJ, H2AX, H3-4]
R-HSA:174143	APC/C-mediated degradation of cell cycle proteins	REACTOME_Pathways_25.05.2022	0.000872685	0.0314167	8.38942e-20	2.76851e-18	[-1]	Group34	4.54545	4	[CDK1, CDK2, RPS27A, UBA52]
R-HSA:176408	Regulation of APC/C activators between G1/S and early anaphase	REACTOME_Pathways_25.05.2022	0.000638861	0.0281099	8.38942e-20	2.76851e-18	[-1]	Group34	4.93827	4	[CDK1, CDK2, RPS27A, UBA52]
R-HSA:179812	GRB2 events in EGFR signaling	REACTOME_Pathways_25.05.2022	3.01168e-05	0.00334297	8.38942e-20	2.76851e-18	[-1]	Group34	23.0769	3	[HRAS, KRAS, NRAS]
R-HSA:180336	SHC1 events in EGFR signaling	REACTOME_Pathways_25.05.2022	3.81963e-05	0.00401061	8.38942e-20	2.76851e-18	[-1]	Group34	21.4286	3	[HRAS, KRAS, NRAS]
R-HSA:186763	Downstream signal transduction	REACTOME_Pathways_25.05.2022	0.000363805	0.0196455	8.38942e-20	2.76851e-18	[-1]	Group34	10.3448	3	[HRAS, KRAS, NRAS]
R-HSA:186797	Signaling by PDGF	REACTOME_Pathways_25.05.2022	0.00277664	0.0360963	8.38942e-20	2.76851e-18	[-1]	Group34	5.17241	3	[HRAS, KRAS, NRAS]
R-HSA:187577	SCF(Skp2)-mediated degradation of p27/p21	REACTOME_Pathways_25.05.2022	0.000202297	0.0141608	8.38942e-20	2.76851e-18	[-1]	Group34	6.66667	4	[CDK2, CDK4, RPS27A, UBA52]
R-HSA:1912408	Pre-NOTCH Transcription and Translation	REACTOME_Pathways_25.05.2022	5.88253e-06	0.000917675	8.38942e-20	2.76851e-18	[-1]	Group34	6.45161	6	[H2AC6, H2AC7, H2AJ, H2AX, H3-3A, H3C14]
R-HSA:1912422	Pre-NOTCH Expression and Processing	REACTOME_Pathways_25.05.2022	1.46882e-05	0.00189478	8.38942e-20	2.76851e-18	[-1]	Group34	5.50459	6	[H2AC6, H2AC7, H2AJ, H2AX, H3-3A, H3C14]
R-HSA:195258	RHO GTPase Effectors	REACTOME_Pathways_25.05.2022	2.11116e-14	8.0013e-12	8.38942e-20	2.76851e-18	[-1]	Group34	5.50459	18	[CDC42, H2AC6, H2AC7, H2AJ, H2AX, H3-3A, H3C14, PPP2CA, RAC1, RHOA, SFN, TUBA3C, TUBA3D, TUBA3E, YWHAB, YWHAG, YWHAH, YWHAZ]
R-HSA:195721	Signaling by WNT	REACTOME_Pathways_25.05.2022	6.2109e-11	2.21108e-08	8.38942e-20	2.76851e-18	[-1]	Group34	4.51807	15	[H2AC6, H2AC7, H2AJ, H2AX, H3-3A, H3-4, H3C14, KRAS, PPP2CA, RAC1, RAC3, RHOA, RPS27A, UBA52, YWHAZ]
R-HSA:1963640	GRB2 events in ERBB2 signaling	REACTOME_Pathways_25.05.2022	5.83527e-05	0.00554351	8.38942e-20	2.76851e-18	[-1]	Group34	18.75	3	[HRAS, KRAS, NRAS]
R-HSA:201681	TCF dependent signaling in response to WNT	REACTOME_Pathways_25.05.2022	1.66827e-08	4.88803e-06	8.38942e-20	2.76851e-18	[-1]	Group34	4.72103	11	[H2AC6, H2AC7, H2AJ, H2AX, H3-3A, H3-4, H3C14, PPP2CA, RPS27A, UBA52, YWHAZ]
R-HSA:201722	Formation of the beta-catenin:TCF transactivating complex	REACTOME_Pathways_25.05.2022	2.85311e-07	6.90452e-05	8.38942e-20	2.76851e-18	[-1]	Group34	7.69231	7	[H2AC6, H2AC7, H2AJ, H2AX, H3-3A, H3-4, H3C14]
R-HSA:211000	Gene Silencing by RNA	REACTOME_Pathways_25.05.2022	4.75035e-06	0.000788558	8.38942e-20	2.76851e-18	[-1]	Group34	5.07246	7	[H2AC6, H2AC7, H2AJ, H2AX, H3-3A, H3C14, TPR]
R-HSA:212165	Epigenetic regulation of gene expression	REACTOME_Pathways_25.05.2022	8.52746e-05	0.00716307	8.38942e-20	2.76851e-18	[-1]	Group34	4.02685	6	[H2AC6, H2AC7, H2AJ, H2AX, H3-3A, H3C14]
R-HSA:212300	PRC2 methylates histones and DNA	REACTOME_Pathways_25.05.2022	1.4197e-06	0.000275421	8.38942e-20	2.76851e-18	[-1]	Group34	8.21918	6	[H2AC6, H2AC7, H2AJ, H2AX, H3-3A, H3C14]
R-HSA:2179392	EGFR Transactivation by Gastrin	REACTOME_Pathways_25.05.2022	8.97058e-06	0.00127382	8.38942e-20	2.76851e-18	[-1]	Group34	33.3333	3	[HRAS, KRAS, NRAS]
R-HSA:2299718	Condensation of Prophase Chromosomes	REACTOME_Pathways_25.05.2022	2.55123e-09	8.08739e-07	8.38942e-20	2.76851e-18	[-1]	Group34	10.8108	8	[CDK1, H2AC6, H2AC7, H2AJ, H2AX, H3-3A, H3-4, H3C14]
R-HSA:2428933	SHC-related events triggered by IGF1R	REACTOME_Pathways_25.05.2022	8.97058e-06	0.00127382	8.38942e-20	2.76851e-18	[-1]	Group34	33.3333	3	[HRAS, KRAS, NRAS]
R-HSA:2559580	Oxidative Stress Induced Senescence	REACTOME_Pathways_25.05.2022	4.80296e-10	1.64261e-07	8.38942e-20	2.76851e-18	[-1]	Group34	8	10	[CDK4, CDK6, H2AC6, H2AC7, H2AJ, H2AX, H3-3A, H3C14, RPS27A, UBA52]
R-HSA:2559582	Senescence-Associated Secretory Phenotype (SASP)	REACTOME_Pathways_25.05.2022	6.51377e-12	2.37752e-09	8.38942e-20	2.76851e-18	[-1]	Group34	9.82143	11	[CDK2, CDK4, CDK6, H2AC6, H2AC7, H2AJ, H2AX, H3-3A, H3C14, RPS27A, UBA52]
R-HSA:2559583	Cellular Senescence	REACTOME_Pathways_25.05.2022	1.94039e-10	6.79138e-08	8.38942e-20	2.76851e-18	[-1]	Group34	6.09137	12	[CDK2, CDK4, CDK6, H2AC6, H2AC7, H2AJ, H2AX, H3-3A, H3-4, H3C14, RPS27A, UBA52]
R-HSA:2559585	Oncogene Induced Senescence	REACTOME_Pathways_25.05.2022	1.87553e-05	0.00232566	8.38942e-20	2.76851e-18	[-1]	Group34	12.1212	4	[CDK4, CDK6, RPS27A, UBA52]
R-HSA:2559586	DNA Damage/Telomere Stress Induced Senescence	REACTOME_Pathways_25.05.2022	2.43898e-06	0.000439017	8.38942e-20	2.76851e-18	[-1]	Group34	7.5	6	[CDK2, H2AC6, H2AC7, H2AJ, H2AX, H3-4]
R-HSA:3214815	HDACs deacetylate histones	REACTOME_Pathways_25.05.2022	1.74134e-08	5.0673e-06	8.38942e-20	2.76851e-18	[-1]	Group34	8.51064	8	[H2AC12, H2AC13, H2AC15, H2AC21, H2AC6, H2AC7, H2AW, H3C14]
R-HSA:3214847	HATs acetylate histones	REACTOME_Pathways_25.05.2022	4.34233e-07	0.000100742	8.38942e-20	2.76851e-18	[-1]	Group34	5.6338	8	[H2AC12, H2AC13, H2AC15, H2AC21, H2AC6, H2AC7, H2AW, H3C14]
R-HSA:3214858	RMTs methylate histone arginines	REACTOME_Pathways_25.05.2022	1.27742e-13	4.77754e-11	8.38942e-20	2.76851e-18	[-1]	Group34	13.9241	11	[CDK4, H2AC12, H2AC13, H2AC15, H2AC21, H2AC6, H2AC7, H2AJ, H2AW, H2AX, H3C14]
R-HSA:3247509	Chromatin modifying enzymes	REACTOME_Pathways_25.05.2022	8.75136e-08	2.31911e-05	8.38942e-20	2.76851e-18	[-1]	Group34	4.0146	11	[CDK4, H2AC12, H2AC13, H2AC15, H2AC21, H2AC6, H2AC7, H2AJ, H2AW, H2AX, H3C14]
R-HSA:3858494	Beta-catenin independent WNT signaling	REACTOME_Pathways_25.05.2022	7.61967e-05	0.0067815	8.38942e-20	2.76851e-18	[-1]	Group34	4.10959	6	[KRAS, RAC1, RAC3, RHOA, RPS27A, UBA52]
R-HSA:4086400	PCP/CE pathway	REACTOME_Pathways_25.05.2022	8.33852e-05	0.00717113	8.38942e-20	2.76851e-18	[-1]	Group34	5.43478	5	[RAC1, RAC3, RHOA, RPS27A, UBA52]
R-HSA:427359	SIRT1 negatively regulates rRNA expression	REACTOME_Pathways_25.05.2022	9.30709e-07	0.000191726	8.38942e-20	2.76851e-18	[-1]	Group34	8.82353	6	[H2AC6, H2AC7, H2AJ, H2AX, H3-3A, H3C14]
R-HSA:427389	ERCC6 (CSB) and EHMT2 (G9a) positively regulate rRNA expression	REACTOME_Pathways_25.05.2022	1.80215e-06	0.000338804	8.38942e-20	2.76851e-18	[-1]	Group34	7.89474	6	[H2AC6, H2AC7, H2AJ, H2AX, H3-3A, H3C14]
R-HSA:427413	NoRC negatively regulates rRNA expression	REACTOME_Pathways_25.05.2022	1.32106e-05	0.0017438	8.38942e-20	2.76851e-18	[-1]	Group34	5.60748	6	[H2AC6, H2AC7, H2AJ, H2AX, H3-3A, H3C14]
R-HSA:442742	CREB1 phosphorylation through NMDA receptor-mediated activation of RAS signaling	REACTOME_Pathways_25.05.2022	0.000363805	0.0196455	8.38942e-20	2.76851e-18	[-1]	Group34	10.3448	3	[HRAS, KRAS, NRAS]
R-HSA:442982	Ras activation upon Ca2+ influx through NMDA receptor	REACTOME_Pathways_25.05.2022	0.00013618	0.0102135	8.38942e-20	2.76851e-18	[-1]	Group34	14.2857	3	[HRAS, KRAS, NRAS]
R-HSA:453276	Regulation of mitotic cell cycle	REACTOME_Pathways_25.05.2022	0.000872685	0.0314167	8.38942e-20	2.76851e-18	[-1]	Group34	4.54545	4	[CDK1, CDK2, RPS27A, UBA52]
R-HSA:453279	Mitotic G1 phase and G1/S transition	REACTOME_Pathways_25.05.2022	6.2674e-07	0.000137883	8.38942e-20	2.76851e-18	[-1]	Group34	5.36913	8	[CDK1, CDK2, CDK4, CDK6, LYN, PPP2CA, RPS27A, UBA52]
R-HSA:4839726	Chromatin organization	REACTOME_Pathways_25.05.2022	8.75136e-08	2.31911e-05	8.38942e-20	2.76851e-18	[-1]	Group34	4.0146	11	[CDK4, H2AC12, H2AC13, H2AC15, H2AC21, H2AC6, H2AC7, H2AJ, H2AW, H2AX, H3C14]
R-HSA:5218921	VEGFR2 mediated cell proliferation	REACTOME_Pathways_25.05.2022	0.00013618	0.0102135	8.38942e-20	2.76851e-18	[-1]	Group34	14.2857	3	[HRAS, KRAS, NRAS]
R-HSA:5250913	Positive epigenetic regulation of rRNA expression	REACTOME_Pathways_25.05.2022	1.25182e-05	0.00168996	8.38942e-20	2.76851e-18	[-1]	Group34	5.66038	6	[H2AC6, H2AC7, H2AJ, H2AX, H3-3A, H3C14]
R-HSA:5250924	B-WICH complex positively regulates rRNA expression	REACTOME_Pathways_25.05.2022	5.18416e-06	0.000839835	8.38942e-20	2.76851e-18	[-1]	Group34	6.59341	6	[H2AC6, H2AC7, H2AJ, H2AX, H3-3A, H3C14]
R-HSA:5250941	Negative epigenetic regulation of rRNA expression	REACTOME_Pathways_25.05.2022	1.54756e-05	0.00198087	8.38942e-20	2.76851e-18	[-1]	Group34	5.45455	6	[H2AC6, H2AC7, H2AJ, H2AX, H3-3A, H3C14]
R-HSA:5334118	DNA methylation	REACTOME_Pathways_25.05.2022	7.10585e-07	0.000153486	8.38942e-20	2.76851e-18	[-1]	Group34	9.23077	6	[H2AC6, H2AC7, H2AJ, H2AX, H3-3A, H3C14]
R-HSA:5578749	Transcriptional regulation by small RNAs	REACTOME_Pathways_25.05.2022	8.09972e-07	0.000171714	8.38942e-20	2.76851e-18	[-1]	Group34	6.60377	7	[H2AC6, H2AC7, H2AJ, H2AX, H3-3A, H3C14, TPR]
R-HSA:5617472	Activation of anterior HOX genes in hindbrain development during early embryogenesis	REACTOME_Pathways_25.05.2022	2.66111e-05	0.00306027	8.38942e-20	2.76851e-18	[-1]	Group34	4.95868	6	[H2AC6, H2AC7, H2AJ, H2AX, H3-3A, H3C14]
R-HSA:5619507	Activation of HOX genes during differentiation	REACTOME_Pathways_25.05.2022	2.66111e-05	0.00306027	8.38942e-20	2.76851e-18	[-1]	Group34	4.95868	6	[H2AC6, H2AC7, H2AJ, H2AX, H3-3A, H3C14]
R-HSA:5625740	RHO GTPases activate PKNs	REACTOME_Pathways_25.05.2022	8.48993e-16	3.26013e-13	8.38942e-20	2.76851e-18	[-1]	Group34	13.6842	13	[H2AC6, H2AC7, H2AJ, H2AX, H3-3A, H3C14, RAC1, RHOA, SFN, YWHAB, YWHAG, YWHAH, YWHAZ]
R-HSA:5625886	Activated PKN1 stimulates transcription of AR (androgen receptor) regulated genes KLK2 and KLK3	REACTOME_Pathways_25.05.2022	8.51888e-07	0.000179748	8.38942e-20	2.76851e-18	[-1]	Group34	8.95522	6	[H2AC6, H2AC7, H2AJ, H2AX, H3-3A, H3C14]
R-HSA:5628897	TP53 Regulates Metabolic Genes	REACTOME_Pathways_25.05.2022	6.38546e-05	0.00593848	8.38942e-20	2.76851e-18	[-1]	Group34	5.74713	5	[SFN, YWHAB, YWHAG, YWHAH, YWHAZ]
R-HSA:5637810	Constitutive Signaling by EGFRvIII	REACTOME_Pathways_25.05.2022	4.75782e-05	0.00475782	8.38942e-20	2.76851e-18	[-1]	Group34	20	3	[HRAS, KRAS, NRAS]
R-HSA:5637812	Signaling by EGFRvIII in Cancer	REACTOME_Pathways_25.05.2022	4.75782e-05	0.00475782	8.38942e-20	2.76851e-18	[-1]	Group34	20	3	[HRAS, KRAS, NRAS]
R-HSA:5663220	RHO GTPases Activate Formins	REACTOME_Pathways_25.05.2022	5.22445e-06	0.000841136	8.38942e-20	2.76851e-18	[-1]	Group34	5	7	[CDC42, PPP2CA, RAC1, RHOA, TUBA3C, TUBA3D, TUBA3E]
R-HSA:5689603	UCH proteinases	REACTOME_Pathways_25.05.2022	1.54351e-09	4.98553e-07	8.38942e-20	2.76851e-18	[-1]	Group34	8.82353	9	[H2AC12, H2AC13, H2AC15, H2AC21, H2AC6, H2AC7, H2AW, RPS27A, UBA52]
R-HSA:5689880	Ub-specific processing proteases	REACTOME_Pathways_25.05.2022	1.19141e-06	0.000239474	8.38942e-20	2.76851e-18	[-1]	Group34	4.09091	9	[H2AC12, H2AC13, H2AC15, H2AC21, H2AC6, H2AC7, H2AW, RPS27A, UBA52]
R-HSA:5689901	Metalloprotease DUBs	REACTOME_Pathways_25.05.2022	1.08392e-13	4.06469e-11	8.38942e-20	2.76851e-18	[-1]	Group34	24.3243	9	[H2AC12, H2AC13, H2AC15, H2AC21, H2AC6, H2AC7, H2AW, RPS27A, UBA52]
R-HSA:5693565	Recruitment and ATM-mediated phosphorylation of repair and signaling proteins at DNA double strand breaks	REACTOME_Pathways_25.05.2022	0.000527346	0.0247852	8.38942e-20	2.76851e-18	[-1]	Group34	5.19481	4	[H2AX, H3-4, RPS27A, UBA52]
R-HSA:5693606	DNA Double Strand Break Response	REACTOME_Pathways_25.05.2022	0.00055381	0.0254753	8.38942e-20	2.76851e-18	[-1]	Group34	5.12821	4	[H2AX, H3-4, RPS27A, UBA52]
R-HSA:5693607	Processing of DNA double-strand break ends	REACTOME_Pathways_25.05.2022	0.000107219	0.00857751	8.38942e-20	2.76851e-18	[-1]	Group34	5.15464	5	[CDK2, H2AX, H3-4, RPS27A, UBA52]
R-HSA:606279	Deposition of new CENPA-containing nucleosomes at the centromere	REACTOME_Pathways_25.05.2022	0.000453353	0.0222143	8.38942e-20	2.76851e-18	[-1]	Group34	5.40541	4	[H2AC6, H2AC7, H2AJ, H2AX]
R-HSA:6802953	RAS signaling downstream of NF1 loss-of-function variants	REACTOME_Pathways_25.05.2022	3.76409e-06	0.000639895	8.38942e-20	2.76851e-18	[-1]	Group34	42.8571	3	[HRAS, KRAS, NRAS]
R-HSA:6804756	Regulation of TP53 Activity through Phosphorylation	REACTOME_Pathways_25.05.2022	0.00103043	0.0319435	8.38942e-20	2.76851e-18	[-1]	Group34	4.34783	4	[CDK2, CDK5, RPS27A, UBA52]
R-HSA:68616	Assembly of the ORC complex at the origin of replication	REACTOME_Pathways_25.05.2022	1.0154e-06	0.000208157	8.38942e-20	2.76851e-18	[-1]	Group34	8.69565	6	[H2AC6, H2AC7, H2AJ, H2AX, H3-3A, H3C14]
R-HSA:68867	Assembly of the pre-replicative complex	REACTOME_Pathways_25.05.2022	4.58155e-07	0.000104918	8.38942e-20	2.76851e-18	[-1]	Group34	5.59441	8	[H2AC6, H2AC7, H2AJ, H2AX, H3-3A, H3C14, RPS27A, UBA52]
R-HSA:68875	Mitotic Prophase	REACTOME_Pathways_25.05.2022	1.68182e-09	5.39863e-07	8.38942e-20	2.76851e-18	[-1]	Group34	7.04225	10	[CDK1, H2AC6, H2AC7, H2AJ, H2AX, H3-3A, H3-4, H3C14, PPP2CA, TPR]
R-HSA:68949	Orc1 removal from chromatin	REACTOME_Pathways_25.05.2022	0.00491623	0.0196649	8.38942e-20	2.76851e-18	[-1]	Group34	4.22535	3	[CDK2, RPS27A, UBA52]
R-HSA:69002	DNA Replication Pre-Initiation	REACTOME_Pathways_25.05.2022	8.06953e-08	2.1465e-05	8.38942e-20	2.76851e-18	[-1]	Group34	5.625	9	[CDK2, H2AC6, H2AC7, H2AJ, H2AX, H3-3A, H3C14, RPS27A, UBA52]
R-HSA:69017	CDK-mediated phosphorylation and removal of Cdc6	REACTOME_Pathways_25.05.2022	0.00531287	0.0106257	8.38942e-20	2.76851e-18	[-1]	Group34	4.10959	3	[CDK2, RPS27A, UBA52]
R-HSA:69202	Cyclin E associated events during G1/S transition	REACTOME_Pathways_25.05.2022	0.000700461	0.0287189	8.38942e-20	2.76851e-18	[-1]	Group34	4.81928	4	[CDK2, CDK4, RPS27A, UBA52]
R-HSA:69206	G1/S Transition	REACTOME_Pathways_25.05.2022	4.16294e-05	0.0042462	8.38942e-20	2.76851e-18	[-1]	Group34	4.58015	6	[CDK1, CDK2, CDK4, PPP2CA, RPS27A, UBA52]
R-HSA:69231	Cyclin D associated events in G1	REACTOME_Pathways_25.05.2022	2.63464e-09	8.32547e-07	8.38942e-20	2.76851e-18	[-1]	Group34	14.8936	7	[CDK2, CDK4, CDK6, LYN, PPP2CA, RPS27A, UBA52]
R-HSA:69236	G1 Phase	REACTOME_Pathways_25.05.2022	2.63464e-09	8.32547e-07	8.38942e-20	2.76851e-18	[-1]	Group34	14.8936	7	[CDK2, CDK4, CDK6, LYN, PPP2CA, RPS27A, UBA52]
R-HSA:69306	DNA Replication	REACTOME_Pathways_25.05.2022	3.19278e-07	7.59881e-05	8.38942e-20	2.76851e-18	[-1]	Group34	4.78723	9	[CDK2, H2AC6, H2AC7, H2AJ, H2AX, H3-3A, H3C14, RPS27A, UBA52]
R-HSA:69473	G2/M DNA damage checkpoint	REACTOME_Pathways_25.05.2022	1.74134e-08	5.0673e-06	8.38942e-20	2.76851e-18	[-1]	Group34	8.51064	8	[CDK1, H2AX, H3-4, SFN, YWHAB, YWHAG, YWHAH, YWHAZ]
R-HSA:69481	G2/M Checkpoints	REACTOME_Pathways_25.05.2022	5.03841e-10	1.7181e-07	8.38942e-20	2.76851e-18	[-1]	Group34	6.58683	11	[CDK1, CDK2, H2AX, H3-4, RPS27A, SFN, UBA52, YWHAB, YWHAG, YWHAH, YWHAZ]
R-HSA:69563	p53-Dependent G1 DNA Damage Response	REACTOME_Pathways_25.05.2022	0.00400495	0.0320396	8.38942e-20	2.76851e-18	[-1]	Group34	4.54545	3	[CDK2, RPS27A, UBA52]
R-HSA:69580	p53-Dependent G1/S DNA damage checkpoint	REACTOME_Pathways_25.05.2022	0.00400495	0.0320396	8.38942e-20	2.76851e-18	[-1]	Group34	4.54545	3	[CDK2, RPS27A, UBA52]
R-HSA:69615	G1/S DNA Damage Checkpoints	REACTOME_Pathways_25.05.2022	0.00435585	0.0261351	8.38942e-20	2.76851e-18	[-1]	Group34	4.41176	3	[CDK2, RPS27A, UBA52]
R-HSA:69620	Cell Cycle Checkpoints	REACTOME_Pathways_25.05.2022	1.74567e-08	5.06243e-06	8.38942e-20	2.76851e-18	[-1]	Group34	4.09556	12	[CDK1, CDK2, H2AX, H3-4, PPP2CA, RPS27A, SFN, UBA52, YWHAB, YWHAG, YWHAH, YWHAZ]
R-HSA:69656	Cyclin A:Cdk2-associated events at S phase entry	REACTOME_Pathways_25.05.2022	0.000766152	0.0291138	8.38942e-20	2.76851e-18	[-1]	Group34	4.70588	4	[CDK2, CDK4, RPS27A, UBA52]
R-HSA:73728	RNA Polymerase I Promoter Opening	REACTOME_Pathways_25.05.2022	5.8908e-07	0.000130187	8.38942e-20	2.76851e-18	[-1]	Group34	9.52381	6	[H2AC6, H2AC7, H2AJ, H2AX, H3-3A, H3C14]
R-HSA:73772	RNA Polymerase I Promoter Escape	REACTOME_Pathways_25.05.2022	5.18416e-06	0.000839835	8.38942e-20	2.76851e-18	[-1]	Group34	6.59341	6	[H2AC6, H2AC7, H2AJ, H2AX, H3-3A, H3C14]
R-HSA:73854	RNA Polymerase I Promoter Clearance	REACTOME_Pathways_25.05.2022	1.54756e-05	0.00198087	8.38942e-20	2.76851e-18	[-1]	Group34	5.45455	6	[H2AC6, H2AC7, H2AJ, H2AX, H3-3A, H3C14]
R-HSA:73864	RNA Polymerase I Transcription	REACTOME_Pathways_25.05.2022	1.71525e-05	0.00217837	8.38942e-20	2.76851e-18	[-1]	Group34	5.35714	6	[H2AC6, H2AC7, H2AJ, H2AX, H3-3A, H3C14]
R-HSA:73884	Base Excision Repair	REACTOME_Pathways_25.05.2022	8.33852e-05	0.00717113	8.38942e-20	2.76851e-18	[-1]	Group34	5.43478	5	[H2AC6, H2AC7, H2AJ, H2AX, H3-4]
R-HSA:73886	Chromosome Maintenance	REACTOME_Pathways_25.05.2022	5.47587e-06	0.00087614	8.38942e-20	2.76851e-18	[-1]	Group34	4.96454	7	[CDK2, H2AC6, H2AC7, H2AJ, H2AX, H3-3A, H3-4]
R-HSA:73927	Depurination	REACTOME_Pathways_25.05.2022	7.42785e-06	0.00109932	8.38942e-20	2.76851e-18	[-1]	Group34	8.92857	5	[H2AC6, H2AC7, H2AJ, H2AX, H3-4]
R-HSA:73928	Depyrimidination	REACTOME_Pathways_25.05.2022	1.13502e-05	0.00154362	8.38942e-20	2.76851e-18	[-1]	Group34	8.19672	5	[H2AC6, H2AC7, H2AJ, H2AX, H3-4]
R-HSA:73929	Base-Excision Repair, AP Site Formation	REACTOME_Pathways_25.05.2022	1.33083e-05	0.00174339	8.38942e-20	2.76851e-18	[-1]	Group34	7.93651	5	[H2AC6, H2AC7, H2AJ, H2AX, H3-4]
R-HSA:75035	Chk1/Chk2(Cds1) mediated inactivation of Cyclin B:Cdk1 complex	REACTOME_Pathways_25.05.2022	1.80681e-11	6.5045e-09	8.38942e-20	2.76851e-18	[-1]	Group34	46.1538	6	[CDK1, SFN, YWHAB, YWHAG, YWHAH, YWHAZ]
R-HSA:75815	Ubiquitin-dependent degradation of Cyclin D	REACTOME_Pathways_25.05.2022	0.00203066	0.0365519	8.38942e-20	2.76851e-18	[-1]	Group34	5.76923	3	[CDK4, RPS27A, UBA52]
R-HSA:774815	Nucleosome assembly	REACTOME_Pathways_25.05.2022	0.000453353	0.0222143	8.38942e-20	2.76851e-18	[-1]	Group34	5.40541	4	[H2AC6, H2AC7, H2AJ, H2AX]
R-HSA:881907	Gastrin-CREB signalling pathway via PKC and MAPK	REACTOME_Pathways_25.05.2022	8.44341e-05	0.0071769	8.38942e-20	2.76851e-18	[-1]	Group34	16.6667	3	[HRAS, KRAS, NRAS]
R-HSA:8851805	MET activates RAS signaling	REACTOME_Pathways_25.05.2022	1.74975e-05	0.00220468	8.38942e-20	2.76851e-18	[-1]	Group34	27.2727	3	[HRAS, KRAS, NRAS]
R-HSA:8878171	Transcriptional regulation by RUNX1	REACTOME_Pathways_25.05.2022	2.38922e-07	5.87749e-05	8.38942e-20	2.76851e-18	[-1]	Group34	4.1841	10	[BLK, CDK6, H2AC6, H2AC7, H2AJ, H2AX, H3-3A, H3C14, RPS27A, UBA52]
R-HSA:8936459	RUNX1 regulates genes involved in megakaryocyte differentiation and platelet function	REACTOME_Pathways_25.05.2022	7.50875e-06	0.00110379	8.38942e-20	2.76851e-18	[-1]	Group34	6.18557	6	[H2AC6, H2AC7, H2AJ, H2AX, H3-3A, H3C14]
R-HSA:8939211	ESR-mediated signaling	REACTOME_Pathways_25.05.2022	1.25537e-07	3.22631e-05	8.38942e-20	2.76851e-18	[-1]	Group34	4.4843	10	[CDK9, H2AC6, H2AC7, H2AJ, H2AX, H3-3A, H3C14, HRAS, KRAS, NRAS]
R-HSA:8939236	RUNX1 regulates transcription of genes involved in differentiation of HSCs	REACTOME_Pathways_25.05.2022	2.20446e-07	5.48911e-05	8.38942e-20	2.76851e-18	[-1]	Group34	6.15385	8	[H2AC6, H2AC7, H2AJ, H2AX, H3-3A, H3C14, RPS27A, UBA52]
R-HSA:9018519	Estrogen-dependent gene expression	REACTOME_Pathways_25.05.2022	8.22719e-06	0.00119294	8.38942e-20	2.76851e-18	[-1]	Group34	4.66667	7	[CDK9, H2AC6, H2AC7, H2AJ, H2AX, H3-3A, H3C14]
R-HSA:9026519	Activated NTRK2 signals through RAS	REACTOME_Pathways_25.05.2022	8.97058e-06	0.00127382	8.38942e-20	2.76851e-18	[-1]	Group34	33.3333	3	[HRAS, KRAS, NRAS]
R-HSA:9028731	Activated NTRK2 signals through FRS2 and FRS3	REACTOME_Pathways_25.05.2022	1.74975e-05	0.00220468	8.38942e-20	2.76851e-18	[-1]	Group34	27.2727	3	[HRAS, KRAS, NRAS]
R-HSA:9034015	Signaling by NTRK3 (TRKC)	REACTOME_Pathways_25.05.2022	7.06089e-05	0.00649602	8.38942e-20	2.76851e-18	[-1]	Group34	17.6471	3	[HRAS, KRAS, NRAS]
R-HSA:9034864	Activated NTRK3 signals through RAS	REACTOME_Pathways_25.05.2022	6.00143e-06	0.00092422	8.38942e-20	2.76851e-18	[-1]	Group34	37.5	3	[HRAS, KRAS, NRAS]
R-HSA:912446	Meiotic recombination	REACTOME_Pathways_25.05.2022	3.30128e-10	1.13894e-07	8.38942e-20	2.76851e-18	[-1]	Group34	10.4651	9	[CDK2, CDK4, H2AC6, H2AC7, H2AJ, H2AX, H3-3A, H3-4, H3C14]
R-HSA:9609646	HCMV Infection	REACTOME_Pathways_25.05.2022	1.70486e-11	6.15453e-09	8.38942e-20	2.76851e-18	[-1]	Group34	7.5	12	[H2AC12, H2AC13, H2AC15, H2AC21, H2AC6, H2AC7, H2AW, H3C14, TPR, TUBA3C, TUBA3D, TUBA3E]
R-HSA:9609690	HCMV Early Events	REACTOME_Pathways_25.05.2022	2.25873e-12	8.31211e-10	8.38942e-20	2.76851e-18	[-1]	Group34	8.88889	12	[H2AC12, H2AC13, H2AC15, H2AC21, H2AC6, H2AC7, H2AW, H3C14, TPR, TUBA3C, TUBA3D, TUBA3E]
R-HSA:9610379	HCMV Late Events	REACTOME_Pathways_25.05.2022	4.86095e-09	1.5069e-06	8.38942e-20	2.76851e-18	[-1]	Group34	7.75862	9	[H2AC12, H2AC13, H2AC15, H2AC21, H2AC6, H2AC7, H2AW, H3C14, TPR]
R-HSA:9614085	FOXO-mediated transcription	REACTOME_Pathways_25.05.2022	0.000275745	0.0168205	8.38942e-20	2.76851e-18	[-1]	Group34	6.15385	4	[SFN, YWHAB, YWHAG, YWHAZ]
R-HSA:9614399	Regulation of localization of FOXO transcription factors	REACTOME_Pathways_25.05.2022	1.6409e-07	4.1843e-05	8.38942e-20	2.76851e-18	[-1]	Group34	36.3636	4	[SFN, YWHAB, YWHAG, YWHAZ]
R-HSA:9616222	Transcriptional regulation of granulopoiesis	REACTOME_Pathways_25.05.2022	1.23189e-08	3.6587e-06	8.38942e-20	2.76851e-18	[-1]	Group34	8.88889	8	[CDK2, CDK4, H2AC6, H2AC7, H2AJ, H2AX, H3-3A, H3C14]
R-HSA:9634285	Constitutive Signaling by Overexpressed ERBB2	REACTOME_Pathways_25.05.2022	1.74975e-05	0.00220468	8.38942e-20	2.76851e-18	[-1]	Group34	27.2727	3	[HRAS, KRAS, NRAS]
R-HSA:9634635	Estrogen-stimulated signaling through PRKCZ	REACTOME_Pathways_25.05.2022	2.15848e-06	0.000395002	8.38942e-20	2.76851e-18	[-1]	Group34	50	3	[HRAS, KRAS, NRAS]
R-HSA:9645723	Diseases of programmed cell death	REACTOME_Pathways_25.05.2022	6.66319e-07	0.000145258	8.38942e-20	2.76851e-18	[-1]	Group34	6.79612	7	[CDK5, H2AC6, H2AC7, H2AJ, H2AX, H3-3A, H3C14]
R-HSA:9649913	RAS GTPase cycle mutants	REACTOME_Pathways_25.05.2022	1.09068e-07	2.85758e-05	8.38942e-20	2.76851e-18	[-1]	Group34	100	3	[HRAS, KRAS, NRAS]
R-HSA:9664565	Signaling by ERBB2 KD Mutants	REACTOME_Pathways_25.05.2022	0.000232224	0.0153268	8.38942e-20	2.76851e-18	[-1]	Group34	12	3	[HRAS, KRAS, NRAS]
R-HSA:9665348	Signaling by ERBB2 ECD mutants	REACTOME_Pathways_25.05.2022	5.83527e-05	0.00554351	8.38942e-20	2.76851e-18	[-1]	Group34	18.75	3	[HRAS, KRAS, NRAS]
R-HSA:9665686	Signaling by ERBB2 TMD/JMD mutants	REACTOME_Pathways_25.05.2022	0.000157131	0.0114706	8.38942e-20	2.76851e-18	[-1]	Group34	13.6364	3	[HRAS, KRAS, NRAS]
R-HSA:9670095	Inhibition of DNA recombination at telomere	REACTOME_Pathways_25.05.2022	9.30709e-07	0.000191726	8.38942e-20	2.76851e-18	[-1]	Group34	8.82353	6	[H2AC6, H2AC7, H2AJ, H2AX, H3-3A, H3-4]
R-HSA:9671555	Signaling by PDGFR in disease	REACTOME_Pathways_25.05.2022	0.000117136	0.00901944	8.38942e-20	2.76851e-18	[-1]	Group34	15	3	[HRAS, KRAS, NRAS]
R-HSA:9673767	Signaling by PDGFRA transmembrane, juxtamembrane and kinase domain mutants	REACTOME_Pathways_25.05.2022	2.32482e-05	0.00276654	8.38942e-20	2.76851e-18	[-1]	Group34	25	3	[HRAS, KRAS, NRAS]
R-HSA:9673770	Signaling by PDGFRA extracellular domain mutants	REACTOME_Pathways_25.05.2022	2.32482e-05	0.00276654	8.38942e-20	2.76851e-18	[-1]	Group34	25	3	[HRAS, KRAS, NRAS]
R-HSA:9703465	Signaling by FLT3 fusion proteins	REACTOME_Pathways_25.05.2022	9.99147e-05	0.00819301	8.38942e-20	2.76851e-18	[-1]	Group34	15.7895	3	[HRAS, KRAS, NRAS]
R-HSA:9703648	Signaling by FLT3 ITD and TKD mutants	REACTOME_Pathways_25.05.2022	5.83527e-05	0.00554351	8.38942e-20	2.76851e-18	[-1]	Group34	18.75	3	[HRAS, KRAS, NRAS]
R-HSA:9710421	Defective pyroptosis	REACTOME_Pathways_25.05.2022	1.4197e-06	0.000275421	8.38942e-20	2.76851e-18	[-1]	Group34	8.21918	6	[H2AC6, H2AC7, H2AJ, H2AX, H3-3A, H3C14]
R-HSA:9753510	Signaling by RAS GAP mutants	REACTOME_Pathways_25.05.2022	1.09068e-07	2.85758e-05	8.38942e-20	2.76851e-18	[-1]	Group34	100	3	[HRAS, KRAS, NRAS]
R-HSA:9753512	Signaling by RAS GTPase mutants	REACTOME_Pathways_25.05.2022	1.09068e-07	2.85758e-05	8.38942e-20	2.76851e-18	[-1]	Group34	100	3	[HRAS, KRAS, NRAS]
R-HSA:9755779	SARS-CoV-2 targets host intracellular signalling and regulatory pathways	REACTOME_Pathways_25.05.2022	1.82168e-09	5.81116e-07	8.38942e-20	2.76851e-18	[-1]	Group34	41.6667	5	[SFN, YWHAB, YWHAG, YWHAH, YWHAZ]
R-HSA:977225	Amyloid fiber formation	REACTOME_Pathways_25.05.2022	1.10692e-06	0.000223597	8.38942e-20	2.76851e-18	[-1]	Group34	6.30631	7	[H2AC6, H2AC7, H2AX, H3-3A, H3C14, RPS27A, UBA52]
R-HSA:983231	Factors involved in megakaryocyte development and platelet production	REACTOME_Pathways_25.05.2022	1.22642e-07	3.16416e-05	8.38942e-20	2.76851e-18	[-1]	Group34	5.35714	9	[CDC42, CDK2, CDK5, H3-3A, H3C14, RAC1, TUBA3C, TUBA3D, TUBA3E]
R-HSA:109704	PI3K Cascade	REACTOME_Pathways_25.05.2022	5.97416e-05	0.00561571	1.02189e-19	3.27005e-18	[-1]	Group35	9.09091	4	[FGFR1, FGFR2, FGFR3, FGFR4]
R-HSA:112399	IRS-mediated signalling	REACTOME_Pathways_25.05.2022	3.07238e-09	9.67799e-07	1.02189e-19	3.27005e-18	[-1]	Group35	14.5833	7	[FGFR1, FGFR2, FGFR3, FGFR4, HRAS, KRAS, NRAS]
R-HSA:112412	SOS-mediated signalling	REACTOME_Pathways_25.05.2022	3.76409e-06	0.000639895	1.02189e-19	3.27005e-18	[-1]	Group35	42.8571	3	[HRAS, KRAS, NRAS]
R-HSA:114604	GPVI-mediated activation cascade	REACTOME_Pathways_25.05.2022	1.56894e-08	4.61269e-06	1.02189e-19	3.27005e-18	[-1]	Group35	17.1429	6	[CDC42, FYN, LCK, LYN, RAC1, RHOA]
R-HSA:1168372	Downstream signaling events of B Cell Receptor (BCR)	REACTOME_Pathways_25.05.2022	5.09445e-05	0.0050435	1.02189e-19	3.27005e-18	[-1]	Group35	6.0241	5	[HRAS, KRAS, NRAS, RPS27A, UBA52]
R-HSA:1169092	Activation of RAS in B cells	REACTOME_Pathways_25.05.2022	1.08304e-06	0.00022094	1.02189e-19	3.27005e-18	[-1]	Group35	60	3	[HRAS, KRAS, NRAS]
R-HSA:1169408	ISG15 antiviral mechanism	REACTOME_Pathways_25.05.2022	0.00511222	0.0153367	1.02189e-19	3.27005e-18	[-1]	Group35	4.16667	3	[RPS27A, TPR, UBA52]
R-HSA:1226099	Signaling by FGFR in disease	REACTOME_Pathways_25.05.2022	2.17669e-08	6.22532e-06	1.02189e-19	3.27005e-18	[-1]	Group35	11.1111	7	[FGFR1, FGFR2, FGFR3, FGFR4, HRAS, KRAS, NRAS]
R-HSA:1227986	Signaling by ERBB2	REACTOME_Pathways_25.05.2022	9.99062e-11	3.52669e-08	1.02189e-19	3.27005e-18	[-1]	Group35	16	8	[FYN, HRAS, KRAS, NRAS, RHOA, RPS27A, UBA52, YES1]
R-HSA:1227990	Signaling by ERBB2 in Cancer	REACTOME_Pathways_25.05.2022	0.000261597	0.0164806	1.02189e-19	3.27005e-18	[-1]	Group35	11.5385	3	[HRAS, KRAS, NRAS]
R-HSA:1236382	Constitutive Signaling by Ligand-Responsive EGFR Cancer Variants	REACTOME_Pathways_25.05.2022	2.60397e-08	7.4213e-06	1.02189e-19	3.27005e-18	[-1]	Group35	26.3158	5	[HRAS, KRAS, NRAS, RPS27A, UBA52]
R-HSA:1236394	Signaling by ERBB4	REACTOME_Pathways_25.05.2022	8.84255e-06	0.00127333	1.02189e-19	3.27005e-18	[-1]	Group35	8.62069	5	[HRAS, KRAS, NRAS, RPS27A, UBA52]
R-HSA:1250196	SHC1 events in ERBB2 signaling	REACTOME_Pathways_25.05.2022	0.000157131	0.0114706	1.02189e-19	3.27005e-18	[-1]	Group35	13.6364	3	[HRAS, KRAS, NRAS]
R-HSA:1250347	SHC1 events in ERBB4 signaling	REACTOME_Pathways_25.05.2022	3.81963e-05	0.00401061	1.02189e-19	3.27005e-18	[-1]	Group35	21.4286	3	[HRAS, KRAS, NRAS]
R-HSA:1295596	Spry regulation of FGF signaling	REACTOME_Pathways_25.05.2022	5.83527e-05	0.00554351	1.02189e-19	3.27005e-18	[-1]	Group35	18.75	3	[PPP2CA, RPS27A, UBA52]
R-HSA:1433557	Signaling by SCF-KIT	REACTOME_Pathways_25.05.2022	2.77399e-11	9.95863e-09	1.02189e-19	3.27005e-18	[-1]	Group35	18.6047	8	[FYN, HRAS, KRAS, LCK, LYN, NRAS, RAC1, YES1]
R-HSA:1433559	Regulation of KIT signaling	REACTOME_Pathways_25.05.2022	8.88365e-07	0.000185668	1.02189e-19	3.27005e-18	[-1]	Group35	25	4	[FYN, LCK, LYN, YES1]
R-HSA:1445148	Translocation of SLC2A4 (GLUT4) to the plasma membrane	REACTOME_Pathways_25.05.2022	6.45783e-11	2.29253e-08	1.02189e-19	3.27005e-18	[-1]	Group35	12.5	9	[RAC1, SFN, TUBA3C, TUBA3D, TUBA3E, YWHAB, YWHAG, YWHAH, YWHAZ]
R-HSA:157858	Gap junction trafficking and regulation	REACTOME_Pathways_25.05.2022	0.00171067	0.0359241	1.02189e-19	3.27005e-18	[-1]	Group35	6.12245	3	[TUBA3C, TUBA3D, TUBA3E]
R-HSA:162906	HIV Infection	REACTOME_Pathways_25.05.2022	1.74272e-07	4.42651e-05	1.02189e-19	3.27005e-18	[-1]	Group35	4.329	10	[CDK9, FYN, HCK, LCK, RAC1, RPS27A, SLC25A4, SLC25A6, TPR, UBA52]
R-HSA:162909	Host Interactions of HIV factors	REACTOME_Pathways_25.05.2022	7.07282e-10	2.37647e-07	1.02189e-19	3.27005e-18	[-1]	Group35	7.69231	10	[CDK9, FYN, HCK, LCK, RAC1, RPS27A, SLC25A4, SLC25A6, TPR, UBA52]
R-HSA:1643713	Signaling by EGFR in Cancer	REACTOME_Pathways_25.05.2022	1.16283e-07	3.02337e-05	1.02189e-19	3.27005e-18	[-1]	Group35	20	5	[HRAS, KRAS, NRAS, RPS27A, UBA52]
R-HSA:164944	Nef and signal transduction	REACTOME_Pathways_25.05.2022	3.51964e-08	9.8198e-06	1.02189e-19	3.27005e-18	[-1]	Group35	50	4	[FYN, HCK, LCK, RAC1]
R-HSA:164952	The role of Nef in HIV-1 replication and disease pathogenesis	REACTOME_Pathways_25.05.2022	9.55974e-06	0.00134792	1.02189e-19	3.27005e-18	[-1]	Group35	14.2857	4	[FYN, HCK, LCK, RAC1]
R-HSA:166520	Signaling by NTRKs	REACTOME_Pathways_25.05.2022	1.73227e-08	5.05824e-06	1.02189e-19	3.27005e-18	[-1]	Group35	6.71642	9	[CDK5, FYN, HRAS, KRAS, NRAS, PPP2CA, RAC1, RHOA, YWHAB]
R-HSA:167044	Signalling to RAS	REACTOME_Pathways_25.05.2022	0.000117136	0.00901944	1.02189e-19	3.27005e-18	[-1]	Group35	15	3	[HRAS, KRAS, NRAS]
R-HSA:170834	Signaling by TGF-beta Receptor Complex	REACTOME_Pathways_25.05.2022	7.11878e-05	0.00647809	1.02189e-19	3.27005e-18	[-1]	Group35	5.61798	5	[CDK9, PPP1CA, RHOA, RPS27A, UBA52]
R-HSA:171007	p38MAPK events	REACTOME_Pathways_25.05.2022	3.01168e-05	0.00334297	1.02189e-19	3.27005e-18	[-1]	Group35	23.0769	3	[HRAS, KRAS, NRAS]
R-HSA:174048	APC/C:Cdc20 mediated degradation of Cyclin B	REACTOME_Pathways_25.05.2022	0.000205074	0.0141501	1.02189e-19	3.27005e-18	[-1]	Group35	12.5	3	[CDK1, RPS27A, UBA52]
R-HSA:174143	APC/C-mediated degradation of cell cycle proteins	REACTOME_Pathways_25.05.2022	0.000872685	0.0314167	1.02189e-19	3.27005e-18	[-1]	Group35	4.54545	4	[CDK1, CDK2, RPS27A, UBA52]
R-HSA:174184	Cdc20:Phospho-APC/C mediated degradation of Cyclin A	REACTOME_Pathways_25.05.2022	0.00531287	0.0106257	1.02189e-19	3.27005e-18	[-1]	Group35	4.10959	3	[CDK1, RPS27A, UBA52]
R-HSA:176408	Regulation of APC/C activators between G1/S and early anaphase	REACTOME_Pathways_25.05.2022	0.000638861	0.0281099	1.02189e-19	3.27005e-18	[-1]	Group35	4.93827	4	[CDK1, CDK2, RPS27A, UBA52]
R-HSA:177929	Signaling by EGFR	REACTOME_Pathways_25.05.2022	1.44904e-07	3.70953e-05	1.02189e-19	3.27005e-18	[-1]	Group35	12	6	[CDC42, HRAS, KRAS, NRAS, RPS27A, UBA52]
R-HSA:179419	APC:Cdc20 mediated degradation of cell cycle proteins prior to satisfation of the cell cycle checkpoint	REACTOME_Pathways_25.05.2022	0.0055182	0.0055182	1.02189e-19	3.27005e-18	[-1]	Group35	4.05405	3	[CDK1, RPS27A, UBA52]
R-HSA:179812	GRB2 events in EGFR signaling	REACTOME_Pathways_25.05.2022	3.01168e-05	0.00334297	1.02189e-19	3.27005e-18	[-1]	Group35	23.0769	3	[HRAS, KRAS, NRAS]
R-HSA:180336	SHC1 events in EGFR signaling	REACTOME_Pathways_25.05.2022	3.81963e-05	0.00401061	1.02189e-19	3.27005e-18	[-1]	Group35	21.4286	3	[HRAS, KRAS, NRAS]
R-HSA:182971	EGFR downregulation	REACTOME_Pathways_25.05.2022	0.000444419	0.022221	1.02189e-19	3.27005e-18	[-1]	Group35	9.67742	3	[CDC42, RPS27A, UBA52]
R-HSA:186763	Downstream signal transduction	REACTOME_Pathways_25.05.2022	0.000363805	0.0196455	1.02189e-19	3.27005e-18	[-1]	Group35	10.3448	3	[HRAS, KRAS, NRAS]
R-HSA:186797	Signaling by PDGF	REACTOME_Pathways_25.05.2022	0.00277664	0.0360963	1.02189e-19	3.27005e-18	[-1]	Group35	5.17241	3	[HRAS, KRAS, NRAS]
R-HSA:187037	Signaling by NTRK1 (TRKA)	REACTOME_Pathways_25.05.2022	1.40573e-06	0.000274118	1.02189e-19	3.27005e-18	[-1]	Group35	6.08696	7	[CDK5, HRAS, KRAS, NRAS, PPP2CA, RHOA, YWHAB]
R-HSA:187577	SCF(Skp2)-mediated degradation of p27/p21	REACTOME_Pathways_25.05.2022	0.000202297	0.0141608	1.02189e-19	3.27005e-18	[-1]	Group35	6.66667	4	[CDK2, CDK4, RPS27A, UBA52]
R-HSA:187687	Signalling to ERKs	REACTOME_Pathways_25.05.2022	2.11776e-05	0.00256249	1.02189e-19	3.27005e-18	[-1]	Group35	11.7647	4	[HRAS, KRAS, NRAS, YWHAB]
R-HSA:190236	Signaling by FGFR	REACTOME_Pathways_25.05.2022	1.25884e-11	4.5696e-09	1.02189e-19	3.27005e-18	[-1]	Group35	11.4943	10	[FGFR1, FGFR2, FGFR3, FGFR4, HRAS, KRAS, NRAS, PPP2CA, RPS27A, UBA52]
R-HSA:190828	Gap junction trafficking	REACTOME_Pathways_25.05.2022	0.00151609	0.0348701	1.02189e-19	3.27005e-18	[-1]	Group35	6.38298	3	[TUBA3C, TUBA3D, TUBA3E]
R-HSA:190840	Microtubule-dependent trafficking of connexons from Golgi to the plasma membrane	REACTOME_Pathways_25.05.2022	8.44341e-05	0.0071769	1.02189e-19	3.27005e-18	[-1]	Group35	16.6667	3	[TUBA3C, TUBA3D, TUBA3E]
R-HSA:190861	Gap junction assembly	REACTOME_Pathways_25.05.2022	0.000693702	0.0291355	1.02189e-19	3.27005e-18	[-1]	Group35	8.33333	3	[TUBA3C, TUBA3D, TUBA3E]
R-HSA:190872	Transport of connexons to the plasma membrane	REACTOME_Pathways_25.05.2022	9.99147e-05	0.00819301	1.02189e-19	3.27005e-18	[-1]	Group35	15.7895	3	[TUBA3C, TUBA3D, TUBA3E]
R-HSA:193704	p75 NTR receptor-mediated signalling	REACTOME_Pathways_25.05.2022	0.00125454	0.032618	1.02189e-19	3.27005e-18	[-1]	Group35	4.12371	4	[RAC1, RHOA, RPS27A, UBA52]
R-HSA:194138	Signaling by VEGF	REACTOME_Pathways_25.05.2022	9.19498e-07	0.000190336	1.02189e-19	3.27005e-18	[-1]	Group35	6.48148	7	[CDC42, FYN, HRAS, KRAS, NRAS, RAC1, RHOA]
R-HSA:1963640	GRB2 events in ERBB2 signaling	REACTOME_Pathways_25.05.2022	5.83527e-05	0.00554351	1.02189e-19	3.27005e-18	[-1]	Group35	18.75	3	[HRAS, KRAS, NRAS]
R-HSA:199418	Negative regulation of the PI3K/AKT network	REACTOME_Pathways_25.05.2022	7.42704e-08	1.99045e-05	1.02189e-19	3.27005e-18	[-1]	Group35	7.07965	8	[FGFR1, FGFR2, FGFR3, FGFR4, FYN, LCK, PPP2CA, RAC1]
R-HSA:202733	Cell surface interactions at the vascular wall	REACTOME_Pathways_25.05.2022	3.29989e-07	7.82075e-05	1.02189e-19	3.27005e-18	[-1]	Group35	5.83942	8	[FYN, HRAS, KRAS, LCK, LYN, NRAS, TEK, YES1]
R-HSA:2029480	Fcgamma receptor (FCGR) dependent phagocytosis	REACTOME_Pathways_25.05.2022	1.93155e-07	4.84818e-05	1.02189e-19	3.27005e-18	[-1]	Group35	8.13953	7	[CDC42, FGR, FYN, HCK, LYN, RAC1, YES1]
R-HSA:2029481	FCGR activation	REACTOME_Pathways_25.05.2022	1.82168e-09	5.81116e-07	1.02189e-19	3.27005e-18	[-1]	Group35	41.6667	5	[FGR, FYN, HCK, LYN, YES1]
R-HSA:210990	PECAM1 interactions	REACTOME_Pathways_25.05.2022	2.45225e-07	5.98348e-05	1.02189e-19	3.27005e-18	[-1]	Group35	33.3333	4	[FYN, LCK, LYN, YES1]
R-HSA:210993	Tie2 Signaling	REACTOME_Pathways_25.05.2022	1.4826e-06	0.000286141	1.02189e-19	3.27005e-18	[-1]	Group35	22.2222	4	[HRAS, KRAS, NRAS, TEK]
R-HSA:2172127	DAP12 interactions	REACTOME_Pathways_25.05.2022	7.57295e-08	2.02198e-05	1.02189e-19	3.27005e-18	[-1]	Group35	13.3333	6	[FYN, HRAS, KRAS, LCK, NRAS, RAC1]
R-HSA:2173788	Downregulation of TGF-beta receptor signaling	REACTOME_Pathways_25.05.2022	0.000261597	0.0164806	1.02189e-19	3.27005e-18	[-1]	Group35	11.5385	3	[PPP1CA, RPS27A, UBA52]
R-HSA:2173789	TGF-beta receptor signaling activates SMADs	REACTOME_Pathways_25.05.2022	0.00142428	0.0341826	1.02189e-19	3.27005e-18	[-1]	Group35	6.52174	3	[PPP1CA, RPS27A, UBA52]
R-HSA:2173791	TGF-beta receptor signaling in EMT (epithelial to mesenchymal transition)	REACTOME_Pathways_25.05.2022	5.83527e-05	0.00554351	1.02189e-19	3.27005e-18	[-1]	Group35	18.75	3	[RHOA, RPS27A, UBA52]
R-HSA:2173793	Transcriptional activity of SMAD2/SMAD3:SMAD4 heterotrimer	REACTOME_Pathways_25.05.2022	0.00142428	0.0341826	1.02189e-19	3.27005e-18	[-1]	Group35	6.52174	3	[CDK9, RPS27A, UBA52]
R-HSA:2173796	SMAD2/SMAD3:SMAD4 heterotrimer regulates transcription	REACTOME_Pathways_25.05.2022	0.000488682	0.0234567	1.02189e-19	3.27005e-18	[-1]	Group35	9.375	3	[CDK9, RPS27A, UBA52]
R-HSA:2179392	EGFR Transactivation by Gastrin	REACTOME_Pathways_25.05.2022	8.97058e-06	0.00127382	1.02189e-19	3.27005e-18	[-1]	Group35	33.3333	3	[HRAS, KRAS, NRAS]
R-HSA:2219528	PI3K/AKT Signaling in Cancer	REACTOME_Pathways_25.05.2022	7.11608e-07	0.000152996	1.02189e-19	3.27005e-18	[-1]	Group35	6.73077	7	[FGFR1, FGFR2, FGFR3, FGFR4, FYN, LCK, RAC1]
R-HSA:2219530	Constitutive Signaling by Aberrant PI3K in Cancer	REACTOME_Pathways_25.05.2022	9.79978e-08	2.58714e-05	1.02189e-19	3.27005e-18	[-1]	Group35	8.97436	7	[FGFR1, FGFR2, FGFR3, FGFR4, FYN, LCK, RAC1]
R-HSA:2404192	Signaling by Type 1 Insulin-like Growth Factor 1 Receptor (IGF1R)	REACTOME_Pathways_25.05.2022	7.21801e-09	2.18706e-06	1.02189e-19	3.27005e-18	[-1]	Group35	12.963	7	[FGFR1, FGFR2, FGFR3, FGFR4, HRAS, KRAS, NRAS]
R-HSA:2424491	DAP12 signaling	REACTOME_Pathways_25.05.2022	5.85205e-09	1.79658e-06	1.02189e-19	3.27005e-18	[-1]	Group35	20	6	[FYN, HRAS, KRAS, LCK, NRAS, RAC1]
R-HSA:2428924	IGF1R signaling cascade	REACTOME_Pathways_25.05.2022	6.30705e-09	1.92996e-06	1.02189e-19	3.27005e-18	[-1]	Group35	13.2075	7	[FGFR1, FGFR2, FGFR3, FGFR4, HRAS, KRAS, NRAS]
R-HSA:2428928	IRS-related events triggered by IGF1R	REACTOME_Pathways_25.05.2022	5.49557e-09	1.69813e-06	1.02189e-19	3.27005e-18	[-1]	Group35	13.4615	7	[FGFR1, FGFR2, FGFR3, FGFR4, HRAS, KRAS, NRAS]
R-HSA:2428933	SHC-related events triggered by IGF1R	REACTOME_Pathways_25.05.2022	8.97058e-06	0.00127382	1.02189e-19	3.27005e-18	[-1]	Group35	33.3333	3	[HRAS, KRAS, NRAS]
R-HSA:2454202	Fc epsilon receptor (FCERI) signaling	REACTOME_Pathways_25.05.2022	2.78386e-07	6.76478e-05	1.02189e-19	3.27005e-18	[-1]	Group35	5.97015	8	[FYN, HRAS, KRAS, LYN, NRAS, RAC1, RPS27A, UBA52]
R-HSA:2559585	Oncogene Induced Senescence	REACTOME_Pathways_25.05.2022	1.87553e-05	0.00232566	1.02189e-19	3.27005e-18	[-1]	Group35	12.1212	4	[CDK4, CDK6, RPS27A, UBA52]
R-HSA:2565942	Regulation of PLK1 Activity at G2/M Transition	REACTOME_Pathways_25.05.2022	0.000872685	0.0314167	1.02189e-19	3.27005e-18	[-1]	Group35	4.54545	4	[CDK1, RPS27A, UBA52, YWHAG]
R-HSA:2682334	EPH-Ephrin signaling	REACTOME_Pathways_25.05.2022	3.07598e-07	7.3516e-05	1.02189e-19	3.27005e-18	[-1]	Group35	7.6087	7	[CDC42, FYN, HRAS, LYN, RAC1, RHOA, YES1]
R-HSA:2871796	FCERI mediated MAPK activation	REACTOME_Pathways_25.05.2022	4.2912e-07	9.99849e-05	1.02189e-19	3.27005e-18	[-1]	Group35	15.625	5	[HRAS, KRAS, LYN, NRAS, RAC1]
R-HSA:2995410	Nuclear Envelope (NE) Reassembly	REACTOME_Pathways_25.05.2022	3.12195e-05	0.00343415	1.02189e-19	3.27005e-18	[-1]	Group35	6.66667	5	[CDK1, PPP2CA, TUBA3C, TUBA3D, TUBA3E]
R-HSA:3371497	HSP90 chaperone cycle for steroid hormone receptors (SHR) in the presence of ligand	REACTOME_Pathways_25.05.2022	0.00238557	0.0381691	1.02189e-19	3.27005e-18	[-1]	Group35	5.45455	3	[TUBA3C, TUBA3D, TUBA3E]
R-HSA:373752	Netrin-1 signaling	REACTOME_Pathways_25.05.2022	0.00181353	0.0362707	1.02189e-19	3.27005e-18	[-1]	Group35	6	3	[CDC42, FYN, RAC1]
R-HSA:373755	Semaphorin interactions	REACTOME_Pathways_25.05.2022	0.000275745	0.0168205	1.02189e-19	3.27005e-18	[-1]	Group35	6.15385	4	[CDK5, FYN, RAC1, RHOA]
R-HSA:373760	L1CAM interactions	REACTOME_Pathways_25.05.2022	0.000279513	0.0167708	1.02189e-19	3.27005e-18	[-1]	Group35	4.20168	5	[FGFR1, RAC1, TUBA3C, TUBA3D, TUBA3E]
R-HSA:375165	NCAM signaling for neurite out-growth	REACTOME_Pathways_25.05.2022	1.33083e-05	0.00174339	1.02189e-19	3.27005e-18	[-1]	Group35	7.93651	5	[FGFR1, FYN, HRAS, KRAS, NRAS]
R-HSA:3769402	Deactivation of the beta-catenin transactivating complex	REACTOME_Pathways_25.05.2022	0.00109225	0.0316752	1.02189e-19	3.27005e-18	[-1]	Group35	7.14286	3	[RPS27A, UBA52, YWHAZ]
R-HSA:380320	Recruitment of NuMA to mitotic centrosomes	REACTOME_Pathways_25.05.2022	9.23691e-05	0.00766663	1.02189e-19	3.27005e-18	[-1]	Group35	5.31915	5	[CDK1, TUBA3C, TUBA3D, TUBA3E, YWHAG]
R-HSA:3858494	Beta-catenin independent WNT signaling	REACTOME_Pathways_25.05.2022	7.61967e-05	0.0067815	1.02189e-19	3.27005e-18	[-1]	Group35	4.10959	6	[KRAS, RAC1, RAC3, RHOA, RPS27A, UBA52]
R-HSA:388841	Costimulation by the CD28 family	REACTOME_Pathways_25.05.2022	4.14585e-08	1.14426e-05	1.02189e-19	3.27005e-18	[-1]	Group35	10.1449	7	[CDC42, FYN, LCK, LYN, PPP2CA, RAC1, YES1]
R-HSA:389356	CD28 co-stimulation	REACTOME_Pathways_25.05.2022	1.07893e-08	3.2152e-06	1.02189e-19	3.27005e-18	[-1]	Group35	18.1818	6	[CDC42, FYN, LCK, LYN, RAC1, YES1]
R-HSA:389359	CD28 dependent Vav1 pathway	REACTOME_Pathways_25.05.2022	2.45225e-07	5.98348e-05	1.02189e-19	3.27005e-18	[-1]	Group35	33.3333	4	[CDC42, FYN, LCK, RAC1]
R-HSA:389513	CTLA4 inhibitory signaling	REACTOME_Pathways_25.05.2022	4.52226e-08	1.2391e-05	1.02189e-19	3.27005e-18	[-1]	Group35	23.8095	5	[FYN, LCK, LYN, PPP2CA, YES1]
R-HSA:389958	Cooperation of Prefoldin and TriC/CCT in actin and tubulin folding	REACTOME_Pathways_25.05.2022	0.000488682	0.0234567	1.02189e-19	3.27005e-18	[-1]	Group35	9.375	3	[TUBA3C, TUBA3D, TUBA3E]
R-HSA:389960	Formation of tubulin folding intermediates by CCT/TriC	REACTOME_Pathways_25.05.2022	0.000232224	0.0153268	1.02189e-19	3.27005e-18	[-1]	Group35	12	3	[TUBA3C, TUBA3D, TUBA3E]
R-HSA:389977	Post-chaperonin tubulin folding pathway	REACTOME_Pathways_25.05.2022	0.000157131	0.0114706	1.02189e-19	3.27005e-18	[-1]	Group35	13.6364	3	[TUBA3C, TUBA3D, TUBA3E]
R-HSA:3928662	EPHB-mediated forward signaling	REACTOME_Pathways_25.05.2022	1.15257e-09	3.79197e-07	1.02189e-19	3.27005e-18	[-1]	Group35	16.6667	7	[CDC42, FYN, HRAS, LYN, RAC1, RHOA, YES1]
R-HSA:3928663	EPHA-mediated growth cone collapse	REACTOME_Pathways_25.05.2022	1.2701e-05	0.00170194	1.02189e-19	3.27005e-18	[-1]	Group35	13.3333	4	[FYN, LYN, RHOA, YES1]
R-HSA:3928665	EPH-ephrin mediated repulsion of cells	REACTOME_Pathways_25.05.2022	0.000107171	0.00868085	1.02189e-19	3.27005e-18	[-1]	Group35	7.84314	4	[FYN, LYN, RAC1, YES1]
R-HSA:400253	Circadian Clock	REACTOME_Pathways_25.05.2022	0.00472485	0.0236243	1.02189e-19	3.27005e-18	[-1]	Group35	4.28571	3	[PPP1CA, RPS27A, UBA52]
R-HSA:4086400	PCP/CE pathway	REACTOME_Pathways_25.05.2022	8.33852e-05	0.00717113	1.02189e-19	3.27005e-18	[-1]	Group35	5.43478	5	[RAC1, RAC3, RHOA, RPS27A, UBA52]
R-HSA:418885	DCC mediated attractive signaling	REACTOME_Pathways_25.05.2022	3.81963e-05	0.00401061	1.02189e-19	3.27005e-18	[-1]	Group35	21.4286	3	[CDC42, FYN, RAC1]
R-HSA:437239	Recycling pathway of L1	REACTOME_Pathways_25.05.2022	0.00151609	0.0348701	1.02189e-19	3.27005e-18	[-1]	Group35	6.38298	3	[TUBA3C, TUBA3D, TUBA3E]
R-HSA:438064	Post NMDA receptor activation events	REACTOME_Pathways_25.05.2022	1.16915e-07	3.0281e-05	1.02189e-19	3.27005e-18	[-1]	Group35	8.75	7	[HRAS, KRAS, NRAS, RAC1, TUBA3C, TUBA3D, TUBA3E]
R-HSA:4420097	VEGFA-VEGFR2 Pathway	REACTOME_Pathways_25.05.2022	5.08557e-07	0.000114425	1.02189e-19	3.27005e-18	[-1]	Group35	7.07071	7	[CDC42, FYN, HRAS, KRAS, NRAS, RAC1, RHOA]
R-HSA:442742	CREB1 phosphorylation through NMDA receptor-mediated activation of RAS signaling	REACTOME_Pathways_25.05.2022	0.000363805	0.0196455	1.02189e-19	3.27005e-18	[-1]	Group35	10.3448	3	[HRAS, KRAS, NRAS]
R-HSA:442755	Activation of NMDA receptors and postsynaptic events	REACTOME_Pathways_25.05.2022	3.31334e-07	7.81947e-05	1.02189e-19	3.27005e-18	[-1]	Group35	7.52688	7	[HRAS, KRAS, NRAS, RAC1, TUBA3C, TUBA3D, TUBA3E]
R-HSA:442982	Ras activation upon Ca2+ influx through NMDA receptor	REACTOME_Pathways_25.05.2022	0.00013618	0.0102135	1.02189e-19	3.27005e-18	[-1]	Group35	14.2857	3	[HRAS, KRAS, NRAS]
R-HSA:448424	Interleukin-17 signaling	REACTOME_Pathways_25.05.2022	0.00511222	0.0153367	1.02189e-19	3.27005e-18	[-1]	Group35	4.16667	3	[PPP2CA, RPS27A, UBA52]
R-HSA:450294	MAP kinase activation	REACTOME_Pathways_25.05.2022	0.00367187	0.0330468	1.02189e-19	3.27005e-18	[-1]	Group35	4.6875	3	[PPP2CA, RPS27A, UBA52]
R-HSA:450531	Regulation of mRNA stability by proteins that bind AU-rich elements	REACTOME_Pathways_25.05.2022	0.000872685	0.0314167	1.02189e-19	3.27005e-18	[-1]	Group35	4.54545	4	[RPS27A, UBA52, YWHAB, YWHAZ]
R-HSA:453274	Mitotic G2-G2/M phases	REACTOME_Pathways_25.05.2022	4.94191e-07	0.000111687	1.02189e-19	3.27005e-18	[-1]	Group35	4.54545	9	[CDK1, CDK2, PPP2CA, RPS27A, TUBA3C, TUBA3D, TUBA3E, UBA52, YWHAG]
R-HSA:453276	Regulation of mitotic cell cycle	REACTOME_Pathways_25.05.2022	0.000872685	0.0314167	1.02189e-19	3.27005e-18	[-1]	Group35	4.54545	4	[CDK1, CDK2, RPS27A, UBA52]
R-HSA:453279	Mitotic G1 phase and G1/S transition	REACTOME_Pathways_25.05.2022	6.2674e-07	0.000137883	1.02189e-19	3.27005e-18	[-1]	Group35	5.36913	8	[CDK1, CDK2, CDK4, CDK6, LYN, PPP2CA, RPS27A, UBA52]
R-HSA:512988	Interleukin-3, Interleukin-5 and GM-CSF signaling	REACTOME_Pathways_25.05.2022	3.07238e-09	9.67799e-07	1.02189e-19	3.27005e-18	[-1]	Group35	14.5833	7	[FYN, HCK, LYN, RPS27A, UBA52, YES1, YWHAZ]
R-HSA:5218921	VEGFR2 mediated cell proliferation	REACTOME_Pathways_25.05.2022	0.00013618	0.0102135	1.02189e-19	3.27005e-18	[-1]	Group35	14.2857	3	[HRAS, KRAS, NRAS]
R-HSA:5621481	C-type lectin receptors (CLRs)	REACTOME_Pathways_25.05.2022	5.73729e-06	0.000900755	1.02189e-19	3.27005e-18	[-1]	Group35	4.92958	7	[FYN, HRAS, KRAS, LYN, NRAS, RPS27A, UBA52]
R-HSA:5621575	CD209 (DC-SIGN) signaling	REACTOME_Pathways_25.05.2022	4.52226e-08	1.2391e-05	1.02189e-19	3.27005e-18	[-1]	Group35	23.8095	5	[FYN, HRAS, KRAS, LYN, NRAS]
R-HSA:5625970	RHO GTPases activate KTN1	REACTOME_Pathways_25.05.2022	1.74975e-05	0.00220468	1.02189e-19	3.27005e-18	[-1]	Group35	27.2727	3	[CDC42, RAC1, RHOA]
R-HSA:5626467	RHO GTPases activate IQGAPs	REACTOME_Pathways_25.05.2022	4.2912e-07	9.99849e-05	1.02189e-19	3.27005e-18	[-1]	Group35	15.625	5	[CDC42, RAC1, TUBA3C, TUBA3D, TUBA3E]
R-HSA:5637810	Constitutive Signaling by EGFRvIII	REACTOME_Pathways_25.05.2022	4.75782e-05	0.00475782	1.02189e-19	3.27005e-18	[-1]	Group35	20	3	[HRAS, KRAS, NRAS]
R-HSA:5637812	Signaling by EGFRvIII in Cancer	REACTOME_Pathways_25.05.2022	4.75782e-05	0.00475782	1.02189e-19	3.27005e-18	[-1]	Group35	20	3	[HRAS, KRAS, NRAS]
R-HSA:5637815	Signaling by Ligand-Responsive EGFR Variants in Cancer	REACTOME_Pathways_25.05.2022	2.60397e-08	7.4213e-06	1.02189e-19	3.27005e-18	[-1]	Group35	26.3158	5	[HRAS, KRAS, NRAS, RPS27A, UBA52]
R-HSA:5654687	Downstream signaling of activated FGFR1	REACTOME_Pathways_25.05.2022	1.45288e-05	0.00188874	1.02189e-19	3.27005e-18	[-1]	Group35	12.9032	4	[FGFR1, HRAS, KRAS, NRAS]
R-HSA:5654688	SHC-mediated cascade:FGFR1	REACTOME_Pathways_25.05.2022	2.86774e-06	0.000507591	1.02189e-19	3.27005e-18	[-1]	Group35	19.0476	4	[FGFR1, HRAS, KRAS, NRAS]
R-HSA:5654693	FRS-mediated FGFR1 signaling	REACTOME_Pathways_25.05.2022	4.21161e-06	0.000711763	1.02189e-19	3.27005e-18	[-1]	Group35	17.3913	4	[FGFR1, HRAS, KRAS, NRAS]
R-HSA:5654696	Downstream signaling of activated FGFR2	REACTOME_Pathways_25.05.2022	1.2701e-05	0.00170194	1.02189e-19	3.27005e-18	[-1]	Group35	13.3333	4	[FGFR2, HRAS, KRAS, NRAS]
R-HSA:5654699	SHC-mediated cascade:FGFR2	REACTOME_Pathways_25.05.2022	4.21161e-06	0.000711763	1.02189e-19	3.27005e-18	[-1]	Group35	17.3913	4	[FGFR2, HRAS, KRAS, NRAS]
R-HSA:5654700	FRS-mediated FGFR2 signaling	REACTOME_Pathways_25.05.2022	5.97221e-06	0.000925692	1.02189e-19	3.27005e-18	[-1]	Group35	16	4	[FGFR2, HRAS, KRAS, NRAS]
R-HSA:5654704	SHC-mediated cascade:FGFR3	REACTOME_Pathways_25.05.2022	1.4826e-06	0.000286141	1.02189e-19	3.27005e-18	[-1]	Group35	22.2222	4	[FGFR3, HRAS, KRAS, NRAS]
R-HSA:5654706	FRS-mediated FGFR3 signaling	REACTOME_Pathways_25.05.2022	2.33012e-06	0.000421752	1.02189e-19	3.27005e-18	[-1]	Group35	20	4	[FGFR3, HRAS, KRAS, NRAS]
R-HSA:5654708	Downstream signaling of activated FGFR3	REACTOME_Pathways_25.05.2022	5.97221e-06	0.000925692	1.02189e-19	3.27005e-18	[-1]	Group35	16	4	[FGFR3, HRAS, KRAS, NRAS]
R-HSA:5654712	FRS-mediated FGFR4 signaling	REACTOME_Pathways_25.05.2022	3.49206e-06	0.000600635	1.02189e-19	3.27005e-18	[-1]	Group35	18.1818	4	[FGFR4, HRAS, KRAS, NRAS]
R-HSA:5654716	Downstream signaling of activated FGFR4	REACTOME_Pathways_25.05.2022	8.22445e-06	0.00120077	1.02189e-19	3.27005e-18	[-1]	Group35	14.8148	4	[FGFR4, HRAS, KRAS, NRAS]
R-HSA:5654719	SHC-mediated cascade:FGFR4	REACTOME_Pathways_25.05.2022	2.33012e-06	0.000421752	1.02189e-19	3.27005e-18	[-1]	Group35	20	4	[FGFR4, HRAS, KRAS, NRAS]
R-HSA:5654726	Negative regulation of FGFR1 signaling	REACTOME_Pathways_25.05.2022	1.87553e-05	0.00232566	1.02189e-19	3.27005e-18	[-1]	Group35	12.1212	4	[FGFR1, PPP2CA, RPS27A, UBA52]
R-HSA:5654727	Negative regulation of FGFR2 signaling	REACTOME_Pathways_25.05.2022	2.11776e-05	0.00256249	1.02189e-19	3.27005e-18	[-1]	Group35	11.7647	4	[FGFR2, PPP2CA, RPS27A, UBA52]
R-HSA:5654732	Negative regulation of FGFR3 signaling	REACTOME_Pathways_25.05.2022	1.10483e-05	0.00152467	1.02189e-19	3.27005e-18	[-1]	Group35	13.7931	4	[FGFR3, PPP2CA, RPS27A, UBA52]
R-HSA:5654733	Negative regulation of FGFR4 signaling	REACTOME_Pathways_25.05.2022	1.45288e-05	0.00188874	1.02189e-19	3.27005e-18	[-1]	Group35	12.9032	4	[FGFR4, PPP2CA, RPS27A, UBA52]
R-HSA:5654736	Signaling by FGFR1	REACTOME_Pathways_25.05.2022	4.13536e-09	1.29023e-06	1.02189e-19	3.27005e-18	[-1]	Group35	14	7	[FGFR1, HRAS, KRAS, NRAS, PPP2CA, RPS27A, UBA52]
R-HSA:5654738	Signaling by FGFR2	REACTOME_Pathways_25.05.2022	6.16357e-08	1.67649e-05	1.02189e-19	3.27005e-18	[-1]	Group35	9.58904	7	[FGFR2, HRAS, KRAS, NRAS, PPP2CA, RPS27A, UBA52]
R-HSA:5654741	Signaling by FGFR3	REACTOME_Pathways_25.05.2022	8.02773e-10	2.67323e-07	1.02189e-19	3.27005e-18	[-1]	Group35	17.5	7	[FGFR3, HRAS, KRAS, NRAS, PPP2CA, RPS27A, UBA52]
R-HSA:5654743	Signaling by FGFR4	REACTOME_Pathways_25.05.2022	9.64257e-10	3.19169e-07	1.02189e-19	3.27005e-18	[-1]	Group35	17.0732	7	[FGFR4, HRAS, KRAS, NRAS, PPP2CA, RPS27A, UBA52]
R-HSA:5655253	Signaling by FGFR2 in disease	REACTOME_Pathways_25.05.2022	5.45116e-05	0.00523311	1.02189e-19	3.27005e-18	[-1]	Group35	9.30233	4	[FGFR2, HRAS, KRAS, NRAS]
R-HSA:5655291	Signaling by FGFR4 in disease	REACTOME_Pathways_25.05.2022	1.6409e-07	4.1843e-05	1.02189e-19	3.27005e-18	[-1]	Group35	36.3636	4	[FGFR4, HRAS, KRAS, NRAS]
R-HSA:5655302	Signaling by FGFR1 in disease	REACTOME_Pathways_25.05.2022	3.32128e-05	0.0036202	1.02189e-19	3.27005e-18	[-1]	Group35	10.5263	4	[FGFR1, HRAS, KRAS, NRAS]
R-HSA:5655332	Signaling by FGFR3 in disease	REACTOME_Pathways_25.05.2022	3.49206e-06	0.000600635	1.02189e-19	3.27005e-18	[-1]	Group35	18.1818	4	[FGFR3, HRAS, KRAS, NRAS]
R-HSA:5658442	Regulation of RAS by GAPs	REACTOME_Pathways_25.05.2022	1.93647e-05	0.00238186	1.02189e-19	3.27005e-18	[-1]	Group35	7.35294	5	[HRAS, KRAS, NRAS, RPS27A, UBA52]
R-HSA:5663220	RHO GTPases Activate Formins	REACTOME_Pathways_25.05.2022	5.22445e-06	0.000841136	1.02189e-19	3.27005e-18	[-1]	Group35	5	7	[CDC42, PPP2CA, RAC1, RHOA, TUBA3C, TUBA3D, TUBA3E]
R-HSA:5673000	RAF activation	REACTOME_Pathways_25.05.2022	7.91176e-07	0.000168521	1.02189e-19	3.27005e-18	[-1]	Group35	13.8889	5	[HRAS, KRAS, NRAS, PPP2CA, YWHAB]
R-HSA:5673001	RAF/MAP kinase cascade	REACTOME_Pathways_25.05.2022	9.28905e-10	3.08396e-07	1.02189e-19	3.27005e-18	[-1]	Group35	4.64286	13	[FGFR1, FGFR2, FGFR3, FGFR4, FYN, HRAS, KRAS, NRAS, PPP2CA, RPS27A, TEK, UBA52, YWHAB]
R-HSA:5674135	MAP2K and MAPK activation	REACTOME_Pathways_25.05.2022	4.08179e-05	0.00420424	1.02189e-19	3.27005e-18	[-1]	Group35	10	4	[HRAS, KRAS, NRAS, YWHAB]
R-HSA:5675221	Negative regulation of MAPK pathway	REACTOME_Pathways_25.05.2022	1.37129e-09	4.47041e-07	1.02189e-19	3.27005e-18	[-1]	Group35	16.2791	7	[HRAS, KRAS, NRAS, PPP2CA, RPS27A, UBA52, YWHAB]
R-HSA:5683057	MAPK family signaling cascades	REACTOME_Pathways_25.05.2022	2.74512e-13	1.02118e-10	1.02189e-19	3.27005e-18	[-1]	Group35	5.23077	17	[CDC42, CDK1, FGFR1, FGFR2, FGFR3, FGFR4, FYN, HRAS, KRAS, NRAS, PPP2CA, RAC1, RPS27A, SEPTIN7, TEK, UBA52, YWHAB]
R-HSA:5684996	MAPK1/MAPK3 signaling	REACTOME_Pathways_25.05.2022	9.9146e-11	3.50977e-08	1.02189e-19	3.27005e-18	[-1]	Group35	4.8951	14	[CDK1, FGFR1, FGFR2, FGFR3, FGFR4, FYN, HRAS, KRAS, NRAS, PPP2CA, RPS27A, TEK, UBA52, YWHAB]
R-HSA:5687128	MAPK6/MAPK4 signaling	REACTOME_Pathways_25.05.2022	4.55471e-06	0.000760637	1.02189e-19	3.27005e-18	[-1]	Group35	6.74157	6	[CDC42, CDK1, RAC1, RPS27A, SEPTIN7, UBA52]
R-HSA:5689896	Ovarian tumor domain proteases	REACTOME_Pathways_25.05.2022	3.68721e-05	0.00394531	1.02189e-19	3.27005e-18	[-1]	Group35	10.2564	4	[CDK1, RHOA, RPS27A, UBA52]
R-HSA:5693565	Recruitment and ATM-mediated phosphorylation of repair and signaling proteins at DNA double strand breaks	REACTOME_Pathways_25.05.2022	0.000527346	0.0247852	1.02189e-19	3.27005e-18	[-1]	Group35	5.19481	4	[H2AX, H3-4, RPS27A, UBA52]
R-HSA:5693606	DNA Double Strand Break Response	REACTOME_Pathways_25.05.2022	0.00055381	0.0254753	1.02189e-19	3.27005e-18	[-1]	Group35	5.12821	4	[H2AX, H3-4, RPS27A, UBA52]
R-HSA:6802946	Signaling by moderate kinase activity BRAF mutants	REACTOME_Pathways_25.05.2022	7.76306e-05	0.00683149	1.02189e-19	3.27005e-18	[-1]	Group35	8.51064	4	[HRAS, KRAS, NRAS, YWHAB]
R-HSA:6802948	Signaling by high-kinase activity BRAF mutants	REACTOME_Pathways_25.05.2022	2.67008e-05	0.00304389	1.02189e-19	3.27005e-18	[-1]	Group35	11.1111	4	[HRAS, KRAS, NRAS, YWHAB]
R-HSA:6802949	Signaling by RAS mutants	REACTOME_Pathways_25.05.2022	7.76306e-05	0.00683149	1.02189e-19	3.27005e-18	[-1]	Group35	8.51064	4	[HRAS, KRAS, NRAS, YWHAB]
R-HSA:6802952	Signaling by BRAF and RAF1 fusions	REACTOME_Pathways_25.05.2022	0.000309881	0.0176632	1.02189e-19	3.27005e-18	[-1]	Group35	5.97015	4	[HRAS, KRAS, NRAS, YWHAB]
R-HSA:6802953	RAS signaling downstream of NF1 loss-of-function variants	REACTOME_Pathways_25.05.2022	3.76409e-06	0.000639895	1.02189e-19	3.27005e-18	[-1]	Group35	42.8571	3	[HRAS, KRAS, NRAS]
R-HSA:6802955	Paradoxical activation of RAF signaling by kinase inactive BRAF	REACTOME_Pathways_25.05.2022	7.76306e-05	0.00683149	1.02189e-19	3.27005e-18	[-1]	Group35	8.51064	4	[HRAS, KRAS, NRAS, YWHAB]
R-HSA:6802957	Oncogenic MAPK signaling	REACTOME_Pathways_25.05.2022	0.000732786	0.0293114	1.02189e-19	3.27005e-18	[-1]	Group35	4.7619	4	[HRAS, KRAS, NRAS, YWHAB]
R-HSA:6804756	Regulation of TP53 Activity through Phosphorylation	REACTOME_Pathways_25.05.2022	0.00103043	0.0319435	1.02189e-19	3.27005e-18	[-1]	Group35	4.34783	4	[CDK2, CDK5, RPS27A, UBA52]
R-HSA:6804757	Regulation of TP53 Degradation	REACTOME_Pathways_25.05.2022	7.91176e-07	0.000168521	1.02189e-19	3.27005e-18	[-1]	Group35	13.8889	5	[CDK1, CDK2, PPP2CA, RPS27A, UBA52]
R-HSA:6806003	Regulation of TP53 Expression and Degradation	REACTOME_Pathways_25.05.2022	9.11314e-07	0.000189553	1.02189e-19	3.27005e-18	[-1]	Group35	13.5135	5	[CDK1, CDK2, PPP2CA, RPS27A, UBA52]
R-HSA:6806834	Signaling by MET	REACTOME_Pathways_25.05.2022	2.26483e-06	0.000412198	1.02189e-19	3.27005e-18	[-1]	Group35	7.59494	6	[HRAS, KRAS, NRAS, RAC1, RPS27A, UBA52]
R-HSA:6811436	COPI-independent Golgi-to-ER retrograde traffic	REACTOME_Pathways_25.05.2022	0.00192018	0.0364835	1.02189e-19	3.27005e-18	[-1]	Group35	5.88235	3	[TUBA3C, TUBA3D, TUBA3E]
R-HSA:6811558	PI5P, PP2A and IER3 Regulate PI3K/AKT Signaling	REACTOME_Pathways_25.05.2022	4.49962e-08	1.2374e-05	1.02189e-19	3.27005e-18	[-1]	Group35	7.54717	8	[FGFR1, FGFR2, FGFR3, FGFR4, FYN, LCK, PPP2CA, RAC1]
R-HSA:68949	Orc1 removal from chromatin	REACTOME_Pathways_25.05.2022	0.00491623	0.0196649	1.02189e-19	3.27005e-18	[-1]	Group35	4.22535	3	[CDK2, RPS27A, UBA52]
R-HSA:69017	CDK-mediated phosphorylation and removal of Cdc6	REACTOME_Pathways_25.05.2022	0.00531287	0.0106257	1.02189e-19	3.27005e-18	[-1]	Group35	4.10959	3	[CDK2, RPS27A, UBA52]
R-HSA:69202	Cyclin E associated events during G1/S transition	REACTOME_Pathways_25.05.2022	0.000700461	0.0287189	1.02189e-19	3.27005e-18	[-1]	Group35	4.81928	4	[CDK2, CDK4, RPS27A, UBA52]
R-HSA:69206	G1/S Transition	REACTOME_Pathways_25.05.2022	4.16294e-05	0.0042462	1.02189e-19	3.27005e-18	[-1]	Group35	4.58015	6	[CDK1, CDK2, CDK4, PPP2CA, RPS27A, UBA52]
R-HSA:69231	Cyclin D associated events in G1	REACTOME_Pathways_25.05.2022	2.63464e-09	8.32547e-07	1.02189e-19	3.27005e-18	[-1]	Group35	14.8936	7	[CDK2, CDK4, CDK6, LYN, PPP2CA, RPS27A, UBA52]
R-HSA:69236	G1 Phase	REACTOME_Pathways_25.05.2022	2.63464e-09	8.32547e-07	1.02189e-19	3.27005e-18	[-1]	Group35	14.8936	7	[CDK2, CDK4, CDK6, LYN, PPP2CA, RPS27A, UBA52]
R-HSA:69275	G2/M Transition	REACTOME_Pathways_25.05.2022	4.5375e-07	0.000104362	1.02189e-19	3.27005e-18	[-1]	Group35	4.59184	9	[CDK1, CDK2, PPP2CA, RPS27A, TUBA3C, TUBA3D, TUBA3E, UBA52, YWHAG]
R-HSA:69563	p53-Dependent G1 DNA Damage Response	REACTOME_Pathways_25.05.2022	0.00400495	0.0320396	1.02189e-19	3.27005e-18	[-1]	Group35	4.54545	3	[CDK2, RPS27A, UBA52]
R-HSA:69580	p53-Dependent G1/S DNA damage checkpoint	REACTOME_Pathways_25.05.2022	0.00400495	0.0320396	1.02189e-19	3.27005e-18	[-1]	Group35	4.54545	3	[CDK2, RPS27A, UBA52]
R-HSA:69615	G1/S DNA Damage Checkpoints	REACTOME_Pathways_25.05.2022	0.00435585	0.0261351	1.02189e-19	3.27005e-18	[-1]	Group35	4.41176	3	[CDK2, RPS27A, UBA52]
R-HSA:69656	Cyclin A:Cdk2-associated events at S phase entry	REACTOME_Pathways_25.05.2022	0.000766152	0.0291138	1.02189e-19	3.27005e-18	[-1]	Group35	4.70588	4	[CDK2, CDK4, RPS27A, UBA52]
R-HSA:74751	Insulin receptor signalling cascade	REACTOME_Pathways_25.05.2022	7.21801e-09	2.18706e-06	1.02189e-19	3.27005e-18	[-1]	Group35	12.963	7	[FGFR1, FGFR2, FGFR3, FGFR4, HRAS, KRAS, NRAS]
R-HSA:74752	Signaling by Insulin receptor	REACTOME_Pathways_25.05.2022	3.90684e-09	1.22284e-06	1.02189e-19	3.27005e-18	[-1]	Group35	10.2564	8	[ATP6V1B2, FGFR1, FGFR2, FGFR3, FGFR4, HRAS, KRAS, NRAS]
R-HSA:75815	Ubiquitin-dependent degradation of Cyclin D	REACTOME_Pathways_25.05.2022	0.00203066	0.0365519	1.02189e-19	3.27005e-18	[-1]	Group35	5.76923	3	[CDK4, RPS27A, UBA52]
R-HSA:881907	Gastrin-CREB signalling pathway via PKC and MAPK	REACTOME_Pathways_25.05.2022	8.44341e-05	0.0071769	1.02189e-19	3.27005e-18	[-1]	Group35	16.6667	3	[HRAS, KRAS, NRAS]
R-HSA:8848021	Signaling by PTK6	REACTOME_Pathways_25.05.2022	4.33241e-12	1.58566e-09	1.02189e-19	3.27005e-18	[-1]	Group35	16.6667	9	[CDK2, CDK4, HRAS, KRAS, NRAS, RAC1, RHOA, RPS27A, UBA52]
R-HSA:8849471	PTK6 Regulates RHO GTPases, RAS GTPase and MAP kinases	REACTOME_Pathways_25.05.2022	4.56974e-09	1.42119e-06	1.02189e-19	3.27005e-18	[-1]	Group35	35.7143	5	[HRAS, KRAS, NRAS, RAC1, RHOA]
R-HSA:8851805	MET activates RAS signaling	REACTOME_Pathways_25.05.2022	1.74975e-05	0.00220468	1.02189e-19	3.27005e-18	[-1]	Group35	27.2727	3	[HRAS, KRAS, NRAS]
R-HSA:8852276	The role of GTSE1 in G2/M progression after G2 checkpoint	REACTOME_Pathways_25.05.2022	1.94688e-06	0.000362119	1.02189e-19	3.27005e-18	[-1]	Group35	7.79221	6	[CDK1, RPS27A, TUBA3C, TUBA3D, TUBA3E, UBA52]
R-HSA:8878166	Transcriptional regulation by RUNX2	REACTOME_Pathways_25.05.2022	0.000301939	0.0175124	1.02189e-19	3.27005e-18	[-1]	Group35	4.13223	5	[CDK1, CDK4, RPS27A, UBA52, YES1]
R-HSA:8939211	ESR-mediated signaling	REACTOME_Pathways_25.05.2022	1.25537e-07	3.22631e-05	1.02189e-19	3.27005e-18	[-1]	Group35	4.4843	10	[CDK9, H2AC6, H2AC7, H2AJ, H2AX, H3-3A, H3C14, HRAS, KRAS, NRAS]
R-HSA:8955332	Carboxyterminal post-translational modifications of tubulin	REACTOME_Pathways_25.05.2022	0.00109225	0.0316752	1.02189e-19	3.27005e-18	[-1]	Group35	7.14286	3	[TUBA3C, TUBA3D, TUBA3E]
R-HSA:8982491	Glycogen metabolism	REACTOME_Pathways_25.05.2022	1.10483e-05	0.00152467	1.02189e-19	3.27005e-18	[-1]	Group35	13.7931	4	[PYGB, PYGM, RPS27A, UBA52]
R-HSA:9006115	Signaling by NTRK2 (TRKB)	REACTOME_Pathways_25.05.2022	1.7797e-09	5.69503e-07	1.02189e-19	3.27005e-18	[-1]	Group35	24	6	[CDK5, FYN, HRAS, KRAS, NRAS, RAC1]
R-HSA:9006335	Signaling by Erythropoietin	REACTOME_Pathways_25.05.2022	5.97221e-06	0.000925692	1.02189e-19	3.27005e-18	[-1]	Group35	16	4	[HRAS, KRAS, LYN, NRAS]
R-HSA:9006927	Signaling by Non-Receptor Tyrosine Kinases	REACTOME_Pathways_25.05.2022	4.33241e-12	1.58566e-09	1.02189e-19	3.27005e-18	[-1]	Group35	16.6667	9	[CDK2, CDK4, HRAS, KRAS, NRAS, RAC1, RHOA, RPS27A, UBA52]
R-HSA:9006936	Signaling by TGFB family members	REACTOME_Pathways_25.05.2022	0.000268786	0.0166647	1.02189e-19	3.27005e-18	[-1]	Group35	4.23729	5	[CDK9, PPP1CA, RHOA, RPS27A, UBA52]
R-HSA:9026519	Activated NTRK2 signals through RAS	REACTOME_Pathways_25.05.2022	8.97058e-06	0.00127382	1.02189e-19	3.27005e-18	[-1]	Group35	33.3333	3	[HRAS, KRAS, NRAS]
R-HSA:9027284	Erythropoietin activates RAS	REACTOME_Pathways_25.05.2022	4.92236e-07	0.000111738	1.02189e-19	3.27005e-18	[-1]	Group35	28.5714	4	[HRAS, KRAS, LYN, NRAS]
R-HSA:9028731	Activated NTRK2 signals through FRS2 and FRS3	REACTOME_Pathways_25.05.2022	1.74975e-05	0.00220468	1.02189e-19	3.27005e-18	[-1]	Group35	27.2727	3	[HRAS, KRAS, NRAS]
R-HSA:9034015	Signaling by NTRK3 (TRKC)	REACTOME_Pathways_25.05.2022	7.06089e-05	0.00649602	1.02189e-19	3.27005e-18	[-1]	Group35	17.6471	3	[HRAS, KRAS, NRAS]
R-HSA:9034864	Activated NTRK3 signals through RAS	REACTOME_Pathways_25.05.2022	6.00143e-06	0.00092422	1.02189e-19	3.27005e-18	[-1]	Group35	37.5	3	[HRAS, KRAS, NRAS]
R-HSA:912631	Regulation of signaling by CBL	REACTOME_Pathways_25.05.2022	7.58591e-10	2.54128e-07	1.02189e-19	3.27005e-18	[-1]	Group35	27.2727	6	[FYN, HCK, LYN, RPS27A, UBA52, YES1]
R-HSA:917937	Iron uptake and transport	REACTOME_Pathways_25.05.2022	0.00277664	0.0360963	1.02189e-19	3.27005e-18	[-1]	Group35	5.17241	3	[ATP6V1B2, RPS27A, UBA52]
R-HSA:9604323	Negative regulation of NOTCH4 signaling	REACTOME_Pathways_25.05.2022	0.00226331	0.0384763	1.02189e-19	3.27005e-18	[-1]	Group35	5.55556	3	[RPS27A, UBA52, YWHAZ]
R-HSA:9607240	FLT3 Signaling	REACTOME_Pathways_25.05.2022	9.54158e-12	3.47313e-09	1.02189e-19	3.27005e-18	[-1]	Group35	21.0526	8	[FYN, HCK, HRAS, KRAS, LCK, NRAS, RPS27A, UBA52]
R-HSA:9609736	Assembly and cell surface presentation of NMDA receptors	REACTOME_Pathways_25.05.2022	0.00101778	0.0325688	1.02189e-19	3.27005e-18	[-1]	Group35	7.31707	3	[TUBA3C, TUBA3D, TUBA3E]
R-HSA:9619483	Activation of AMPK downstream of NMDARs	REACTOME_Pathways_25.05.2022	0.000363805	0.0196455	1.02189e-19	3.27005e-18	[-1]	Group35	10.3448	3	[TUBA3C, TUBA3D, TUBA3E]
R-HSA:9634285	Constitutive Signaling by Overexpressed ERBB2	REACTOME_Pathways_25.05.2022	1.74975e-05	0.00220468	1.02189e-19	3.27005e-18	[-1]	Group35	27.2727	3	[HRAS, KRAS, NRAS]
R-HSA:9634635	Estrogen-stimulated signaling through PRKCZ	REACTOME_Pathways_25.05.2022	2.15848e-06	0.000395002	1.02189e-19	3.27005e-18	[-1]	Group35	50	3	[HRAS, KRAS, NRAS]
R-HSA:9646399	Aggrephagy	REACTOME_Pathways_25.05.2022	1.96693e-06	0.000363882	1.02189e-19	3.27005e-18	[-1]	Group35	11.6279	5	[RPS27A, TUBA3C, TUBA3D, TUBA3E, UBA52]
R-HSA:9648002	RAS processing	REACTOME_Pathways_25.05.2022	1.75346e-07	4.43625e-05	1.02189e-19	3.27005e-18	[-1]	Group35	18.5185	5	[HRAS, KRAS, NRAS, RPS27A, UBA52]
R-HSA:9649913	RAS GTPase cycle mutants	REACTOME_Pathways_25.05.2022	1.09068e-07	2.85758e-05	1.02189e-19	3.27005e-18	[-1]	Group35	100	3	[HRAS, KRAS, NRAS]
R-HSA:9649948	Signaling downstream of RAS mutants	REACTOME_Pathways_25.05.2022	7.76306e-05	0.00683149	1.02189e-19	3.27005e-18	[-1]	Group35	8.51064	4	[HRAS, KRAS, NRAS, YWHAB]
R-HSA:9656223	Signaling by RAF1 mutants	REACTOME_Pathways_25.05.2022	5.45116e-05	0.00523311	1.02189e-19	3.27005e-18	[-1]	Group35	9.30233	4	[HRAS, KRAS, NRAS, YWHAB]
R-HSA:9659787	Aberrant regulation of mitotic G1/S transition in cancer due to RB1 defects	REACTOME_Pathways_25.05.2022	7.06089e-05	0.00649602	1.02189e-19	3.27005e-18	[-1]	Group35	17.6471	3	[CDK2, CDK4, CDK6]
R-HSA:9661069	Defective binding of RB1 mutants to E2F1,(E2F2, E2F3)	REACTOME_Pathways_25.05.2022	7.06089e-05	0.00649602	1.02189e-19	3.27005e-18	[-1]	Group35	17.6471	3	[CDK2, CDK4, CDK6]
R-HSA:9663891	Selective autophagy	REACTOME_Pathways_25.05.2022	4.52996e-05	0.00457525	1.02189e-19	3.27005e-18	[-1]	Group35	6.17284	5	[RPS27A, TUBA3C, TUBA3D, TUBA3E, UBA52]
R-HSA:9664323	FCGR3A-mediated IL10 synthesis	REACTOME_Pathways_25.05.2022	1.36002e-06	0.000266563	1.02189e-19	3.27005e-18	[-1]	Group35	12.5	5	[FGR, FYN, HCK, LYN, YES1]
R-HSA:9664407	Parasite infection	REACTOME_Pathways_25.05.2022	1.36339e-08	4.03563e-06	1.02189e-19	3.27005e-18	[-1]	Group35	11.8644	7	[CDC42, FGR, FYN, HCK, LYN, RAC1, YES1]
R-HSA:9664417	Leishmania phagocytosis	REACTOME_Pathways_25.05.2022	1.36339e-08	4.03563e-06	1.02189e-19	3.27005e-18	[-1]	Group35	11.8644	7	[CDC42, FGR, FYN, HCK, LYN, RAC1, YES1]
R-HSA:9664422	FCGR3A-mediated phagocytosis	REACTOME_Pathways_25.05.2022	1.36339e-08	4.03563e-06	1.02189e-19	3.27005e-18	[-1]	Group35	11.8644	7	[CDC42, FGR, FYN, HCK, LYN, RAC1, YES1]
R-HSA:9664565	Signaling by ERBB2 KD Mutants	REACTOME_Pathways_25.05.2022	0.000232224	0.0153268	1.02189e-19	3.27005e-18	[-1]	Group35	12	3	[HRAS, KRAS, NRAS]
R-HSA:9665348	Signaling by ERBB2 ECD mutants	REACTOME_Pathways_25.05.2022	5.83527e-05	0.00554351	1.02189e-19	3.27005e-18	[-1]	Group35	18.75	3	[HRAS, KRAS, NRAS]
R-HSA:9665686	Signaling by ERBB2 TMD/JMD mutants	REACTOME_Pathways_25.05.2022	0.000157131	0.0114706	1.02189e-19	3.27005e-18	[-1]	Group35	13.6364	3	[HRAS, KRAS, NRAS]
R-HSA:9668328	Sealing of the nuclear envelope (NE) by ESCRT-III	REACTOME_Pathways_25.05.2022	0.000444419	0.022221	1.02189e-19	3.27005e-18	[-1]	Group35	9.67742	3	[TUBA3C, TUBA3D, TUBA3E]
R-HSA:9669938	Signaling by KIT in disease	REACTOME_Pathways_25.05.2022	3.61064e-12	1.32511e-09	1.02189e-19	3.27005e-18	[-1]	Group35	35	7	[FYN, HRAS, KRAS, LCK, LYN, NRAS, YES1]
R-HSA:9670439	Signaling by phosphorylated juxtamembrane, extracellular and kinase domain KIT mutants	REACTOME_Pathways_25.05.2022	3.61064e-12	1.32511e-09	1.02189e-19	3.27005e-18	[-1]	Group35	35	7	[FYN, HRAS, KRAS, LCK, LYN, NRAS, YES1]
R-HSA:9671555	Signaling by PDGFR in disease	REACTOME_Pathways_25.05.2022	0.000117136	0.00901944	1.02189e-19	3.27005e-18	[-1]	Group35	15	3	[HRAS, KRAS, NRAS]
R-HSA:9673767	Signaling by PDGFRA transmembrane, juxtamembrane and kinase domain mutants	REACTOME_Pathways_25.05.2022	2.32482e-05	0.00276654	1.02189e-19	3.27005e-18	[-1]	Group35	25	3	[HRAS, KRAS, NRAS]
R-HSA:9673770	Signaling by PDGFRA extracellular domain mutants	REACTOME_Pathways_25.05.2022	2.32482e-05	0.00276654	1.02189e-19	3.27005e-18	[-1]	Group35	25	3	[HRAS, KRAS, NRAS]
R-HSA:9674555	Signaling by CSF3 (G-CSF)	REACTOME_Pathways_25.05.2022	3.05999e-07	7.34397e-05	1.02189e-19	3.27005e-18	[-1]	Group35	16.6667	5	[HCK, KRAS, LYN, RPS27A, UBA52]
R-HSA:9675126	Diseases of mitotic cell cycle	REACTOME_Pathways_25.05.2022	0.000813914	0.0301148	1.02189e-19	3.27005e-18	[-1]	Group35	7.89474	3	[CDK2, CDK4, CDK6]
R-HSA:9682385	FLT3 signaling in disease	REACTOME_Pathways_25.05.2022	2.12651e-07	5.31628e-05	1.02189e-19	3.27005e-18	[-1]	Group35	17.8571	5	[HRAS, KRAS, NRAS, RPS27A, UBA52]
R-HSA:9687139	Aberrant regulation of mitotic cell cycle due to RB1 defects	REACTOME_Pathways_25.05.2022	0.000693702	0.0291355	1.02189e-19	3.27005e-18	[-1]	Group35	8.33333	3	[CDK2, CDK4, CDK6]
R-HSA:9703465	Signaling by FLT3 fusion proteins	REACTOME_Pathways_25.05.2022	9.99147e-05	0.00819301	1.02189e-19	3.27005e-18	[-1]	Group35	15.7895	3	[HRAS, KRAS, NRAS]
R-HSA:9703648	Signaling by FLT3 ITD and TKD mutants	REACTOME_Pathways_25.05.2022	5.83527e-05	0.00554351	1.02189e-19	3.27005e-18	[-1]	Group35	18.75	3	[HRAS, KRAS, NRAS]
R-HSA:9705462	Inactivation of CSF3 (G-CSF) signaling	REACTOME_Pathways_25.05.2022	5.97221e-06	0.000925692	1.02189e-19	3.27005e-18	[-1]	Group35	16	4	[HCK, LYN, RPS27A, UBA52]
R-HSA:9706374	FLT3 signaling through SRC family kinases	REACTOME_Pathways_25.05.2022	2.15848e-06	0.000395002	1.02189e-19	3.27005e-18	[-1]	Group35	50	3	[FYN, HCK, LCK]
R-HSA:9753510	Signaling by RAS GAP mutants	REACTOME_Pathways_25.05.2022	1.09068e-07	2.85758e-05	1.02189e-19	3.27005e-18	[-1]	Group35	100	3	[HRAS, KRAS, NRAS]
R-HSA:9753512	Signaling by RAS GTPase mutants	REACTOME_Pathways_25.05.2022	1.09068e-07	2.85758e-05	1.02189e-19	3.27005e-18	[-1]	Group35	100	3	[HRAS, KRAS, NRAS]
R-HSA:983189	Kinesins	REACTOME_Pathways_25.05.2022	0.00291524	0.0349828	1.02189e-19	3.27005e-18	[-1]	Group35	5.08475	3	[TUBA3C, TUBA3D, TUBA3E]
R-HSA:983231	Factors involved in megakaryocyte development and platelet production	REACTOME_Pathways_25.05.2022	1.22642e-07	3.16416e-05	1.02189e-19	3.27005e-18	[-1]	Group35	5.35714	9	[CDC42, CDK2, CDK5, H3-3A, H3C14, RAC1, TUBA3C, TUBA3D, TUBA3E]
R-HSA:983695	Antigen activates B Cell Receptor (BCR) leading to generation of second messengers	REACTOME_Pathways_25.05.2022	0.000488682	0.0234567	1.02189e-19	3.27005e-18	[-1]	Group35	9.375	3	[BLK, FYN, LYN]
R-HSA:983705	Signaling by the B Cell Receptor (BCR)	REACTOME_Pathways_25.05.2022	6.9285e-08	1.86377e-05	1.02189e-19	3.27005e-18	[-1]	Group35	7.14286	8	[BLK, FYN, HRAS, KRAS, LYN, NRAS, RPS27A, UBA52]
R-HSA:9614423	14-3-3 proteins bind AKT-phosphorylated FOXO1	REACTOME_Reactions_25.05.2022	1.08304e-06	0.00022094	5.29013e-07	4.23211e-06	[-1]	Group09	60	3	[YWHAB, YWHAG, YWHAZ]
R-HSA:210977	Sos-mediated nucleotide exchange of Ras (Tie2 receptor:Grb2:Sos)	REACTOME_Reactions_25.05.2022	1.76636e-08	5.10478e-06	1.54335e-07	1.38901e-06	[-1]	Group10	57.1429	4	[HRAS, KRAS, NRAS, TEK]
R-HSA:442273	VAV1 is a GEF for Rho/Rac family GTPases	REACTOME_Reactions_25.05.2022	6.00143e-06	0.00092422	1.68775e-05	8.43874e-05	[-1]	Group12	37.5	3	[CDC42, RAC1, RHOA]
R-HSA:442291	VAV2 is a GEF for Rho/Rac family kinases	REACTOME_Reactions_25.05.2022	2.15848e-06	0.000395002	1.68775e-05	8.43874e-05	[-1]	Group12	50	3	[CDC42, RAC1, RHOA]
R-HSA:5625959	Activated RHOA, RHOG, RAC1 and CDC42 bind KTN1 (kinectin)	REACTOME_Reactions_25.05.2022	1.08304e-06	0.00022094	1.68775e-05	8.43874e-05	[-1]	Group12	60	3	[CDC42, RAC1, RHOA]
R-HSA:5672083	KTN1 binds Kinesin-1	REACTOME_Reactions_25.05.2022	1.74975e-05	0.00220468	1.68775e-05	8.43874e-05	[-1]	Group12	27.2727	3	[CDC42, RAC1, RHOA]
R-HSA:392054	NCAM1:pFAK:Grb2:Sos-mediated nucleotide exchange of Ras	REACTOME_Reactions_25.05.2022	8.88365e-07	0.000185668	1.70456e-10	2.38638e-09	[-1]	Group14	25	4	[FYN, HRAS, KRAS, NRAS]
R-HSA:5624486	SFKs phosphorylates RAF1 on Y340,Y341	REACTOME_Reactions_25.05.2022	1.41208e-11	5.11174e-09	1.70456e-10	2.38638e-09	[-1]	Group14	83.3333	5	[FYN, HRAS, KRAS, LYN, NRAS]
R-HSA:389348	Activation of Rac1 by pVav1	REACTOME_Reactions_25.05.2022	6.00143e-06	0.00092422	7.93847e-11	1.19077e-09	[-1]	Group15	37.5	3	[FYN, LCK, RAC1]
R-HSA:912627	CBL ubiquitinates PI3K	REACTOME_Reactions_25.05.2022	1.28297e-10	4.51607e-08	7.93847e-11	1.19077e-09	[-1]	Group15	35.2941	6	[FYN, HCK, LYN, RPS27A, UBA52, YES1]
R-HSA:2468287	CDK1 phosphorylates CDCA5 (Sororin) at centromeres	REACTOME_Reactions_25.05.2022	0.00035086	0.0192973	5.52784e-09	6.6334e-08	[-1]	Group16	4	5	[CDK1, PPP2CA, TUBA3C, TUBA3D, TUBA3E]
R-HSA:442273	VAV1 is a GEF for Rho/Rac family GTPases	REACTOME_Reactions_25.05.2022	6.00143e-06	0.00092422	3.34622e-16	9.03481e-15	[-1]	Group18	37.5	3	[CDC42, RAC1, RHOA]
R-HSA:442291	VAV2 is a GEF for Rho/Rac family kinases	REACTOME_Reactions_25.05.2022	2.15848e-06	0.000395002	3.34622e-16	9.03481e-15	[-1]	Group18	50	3	[CDC42, RAC1, RHOA]
R-HSA:5625959	Activated RHOA, RHOG, RAC1 and CDC42 bind KTN1 (kinectin)	REACTOME_Reactions_25.05.2022	1.08304e-06	0.00022094	3.34622e-16	9.03481e-15	[-1]	Group18	60	3	[CDC42, RAC1, RHOA]
R-HSA:5672083	KTN1 binds Kinesin-1	REACTOME_Reactions_25.05.2022	1.74975e-05	0.00220468	3.34622e-16	9.03481e-15	[-1]	Group18	27.2727	3	[CDC42, RAC1, RHOA]
R-HSA:8942607	Tyrosine kinases phosphorylate Cip/Kip inhibitors bound to CDK4/6:CCND complexes	REACTOME_Reactions_25.05.2022	3.01168e-05	0.00334297	6.72002e-27	2.35201e-25	[-1]	Group20	23.0769	3	[CDK4, CDK6, LYN]
R-HSA:9018017	RB1 binds and inhibits E2F1/2/3:DP1/2 complexes	REACTOME_Reactions_25.05.2022	7.06089e-05	0.00649602	6.72002e-27	2.35201e-25	[-1]	Group20	17.6471	3	[CDK2, CDK4, CDK6]
R-HSA:9659782	Defective RB1 does not bind E2F1,(E2F2,E2F3)	REACTOME_Reactions_25.05.2022	7.06089e-05	0.00649602	6.72002e-27	2.35201e-25	[-1]	Group20	17.6471	3	[CDK2, CDK4, CDK6]
R-HSA:5672965	RAS GEFs promote RAS nucleotide exchange	REACTOME_Reactions_25.05.2022	7.06213e-09	2.14689e-06	6.68076e-12	1.06892e-10	[-1]	Group21	7.43802	9	[FGFR1, FGFR2, FGFR3, FGFR4, FYN, HRAS, KRAS, NRAS, TEK]
R-HSA:5675431	PP2A dephosphorylates RAF1	REACTOME_Reactions_25.05.2022	1.39637e-08	4.11928e-06	6.68076e-12	1.06892e-10	[-1]	Group21	29.4118	5	[HRAS, KRAS, NRAS, PPP2CA, YWHAB]
R-HSA:3321975	NuA4 complex acetylates histone H2A, HIST1H4	REACTOME_Reactions_25.05.2022	3.07238e-09	9.67799e-07	1.84981e-17	5.54942e-16	[-1]	Group22	14.5833	7	[H2AC12, H2AC13, H2AC15, H2AC21, H2AC6, H2AC7, H2AW]
R-HSA:3662335	EP300 acetylates histone H2A, H2B, H3, H4	REACTOME_Reactions_25.05.2022	6.84662e-10	2.30731e-07	1.84981e-17	5.54942e-16	[-1]	Group22	12.6984	8	[H2AC12, H2AC13, H2AC15, H2AC21, H2AC6, H2AC7, H2AW, H3C14]
R-HSA:3769447	HDAC1:2-containing complex deacetylate histones	REACTOME_Reactions_25.05.2022	8.56653e-09	2.57852e-06	1.84981e-17	5.54942e-16	[-1]	Group22	9.30233	8	[H2AC12, H2AC13, H2AC15, H2AC21, H2AC6, H2AC7, H2AW, H3C14]
R-HSA:3777129	HDAC3 containing complexes deacetylate histone	REACTOME_Reactions_25.05.2022	1.28126e-09	4.18971e-07	1.84981e-17	5.54942e-16	[-1]	Group22	11.7647	8	[H2AC12, H2AC13, H2AC15, H2AC21, H2AC6, H2AC7, H2AW, H3C14]
R-HSA:3782637	HDAC8 deacetylates histones	REACTOME_Reactions_25.05.2022	6.84662e-10	2.30731e-07	1.84981e-17	5.54942e-16	[-1]	Group22	12.6984	8	[H2AC12, H2AC13, H2AC15, H2AC21, H2AC6, H2AC7, H2AW, H3C14]
R-HSA:3782655	HDAC10 deacetylates histone	REACTOME_Reactions_25.05.2022	6.84662e-10	2.30731e-07	1.84981e-17	5.54942e-16	[-1]	Group22	12.6984	8	[H2AC12, H2AC13, H2AC15, H2AC21, H2AC6, H2AC7, H2AW, H3C14]
R-HSA:5205820	PRMT6 methylates arginine-4 of histone H2A (H2AR3)	REACTOME_Reactions_25.05.2022	1.49395e-12	5.51269e-10	1.84981e-17	5.54942e-16	[-1]	Group22	38.8889	7	[H2AC12, H2AC13, H2AC15, H2AC21, H2AC6, H2AC7, H2AW]
R-HSA:5205867	PRMT1 methylates arginine-12 of histone H2A (H2AR11)	REACTOME_Reactions_25.05.2022	1.49395e-12	5.51269e-10	1.84981e-17	5.54942e-16	[-1]	Group22	38.8889	7	[H2AC12, H2AC13, H2AC15, H2AC21, H2AC6, H2AC7, H2AW]
R-HSA:5229203	PRMT6 methylates histone H2A arginine-30 (H2AR29)	REACTOME_Reactions_25.05.2022	1.49395e-12	5.51269e-10	1.84981e-17	5.54942e-16	[-1]	Group22	38.8889	7	[H2AC12, H2AC13, H2AC15, H2AC21, H2AC6, H2AC7, H2AW]
R-HSA:5690080	USP3,SAGA deubiquitinate Histone H2A,H2B	REACTOME_Reactions_25.05.2022	1.39909e-12	5.17662e-10	1.84981e-17	5.54942e-16	[-1]	Group22	18.75	9	[H2AC12, H2AC13, H2AC15, H2AC21, H2AC6, H2AC7, H2AW, RPS27A, UBA52]
R-HSA:5690157	USP16,USP21 deubiquitinate Histone H2A	REACTOME_Reactions_25.05.2022	7.5251e-16	2.89717e-13	1.84981e-17	5.54942e-16	[-1]	Group22	39.1304	9	[H2AC12, H2AC13, H2AC15, H2AC21, H2AC6, H2AC7, H2AW, RPS27A, UBA52]
R-HSA:5690790	Histone H2A is dubiquitinated by the PR-DUB complex	REACTOME_Reactions_25.05.2022	1.28153e-14	4.86982e-12	1.84981e-17	5.54942e-16	[-1]	Group22	30	9	[H2AC12, H2AC13, H2AC15, H2AC21, H2AC6, H2AC7, H2AW, RPS27A, UBA52]
R-HSA:5691381	MYSM1 deubiquitinates Histone H2A	REACTOME_Reactions_25.05.2022	1.19927e-15	4.5932e-13	1.84981e-17	5.54942e-16	[-1]	Group22	37.5	9	[H2AC12, H2AC13, H2AC15, H2AC21, H2AC6, H2AC7, H2AW, RPS27A, UBA52]
R-HSA:5691411	BRCA1-A complex deubiquitinates K63polyUb-histone H2A	REACTOME_Reactions_25.05.2022	6.2358e-15	2.37584e-12	1.84981e-17	5.54942e-16	[-1]	Group22	32.1429	9	[H2AC12, H2AC13, H2AC15, H2AC21, H2AC6, H2AC7, H2AW, RPS27A, UBA52]
R-HSA:9614367	HCMV Nuclear Pore Docking	REACTOME_Reactions_25.05.2022	0.000124656	0.00947388	1.84981e-17	5.54942e-16	[-1]	Group22	7.54717	4	[TPR, TUBA3C, TUBA3D, TUBA3E]
R-HSA:9614810	Activation of Latent HCMV Genome	REACTOME_Reactions_25.05.2022	1.62344e-09	5.22746e-07	1.84981e-17	5.54942e-16	[-1]	Group22	11.4286	8	[H2AC12, H2AC13, H2AC15, H2AC21, H2AC6, H2AC7, H2AW, H3C14]
R-HSA:9614811	Transcriptional Activation of the HCMV Genome	REACTOME_Reactions_25.05.2022	6.00084e-10	2.03428e-07	1.84981e-17	5.54942e-16	[-1]	Group22	12.9032	8	[H2AC12, H2AC13, H2AC15, H2AC21, H2AC6, H2AC7, H2AW, H3C14]
R-HSA:9614816	Latent Transcriptinally Repressed HCMV Genome	REACTOME_Reactions_25.05.2022	3.51999e-09	1.10528e-06	1.84981e-17	5.54942e-16	[-1]	Group22	10.3896	8	[H2AC12, H2AC13, H2AC15, H2AC21, H2AC6, H2AC7, H2AW, H3C14]
R-HSA:9621073	Immediate Early (IE) Gene Expression	REACTOME_Reactions_25.05.2022	7.7939e-10	2.60316e-07	1.84981e-17	5.54942e-16	[-1]	Group22	12.5	8	[H2AC12, H2AC13, H2AC15, H2AC21, H2AC6, H2AC7, H2AW, H3C14]
R-HSA:9623096	Delayed Early (DE) Gene Expression	REACTOME_Reactions_25.05.2022	7.7939e-10	2.60316e-07	1.84981e-17	5.54942e-16	[-1]	Group22	12.5	8	[H2AC12, H2AC13, H2AC15, H2AC21, H2AC6, H2AC7, H2AW, H3C14]
R-HSA:9698928	Late (L) Gene Expression	REACTOME_Reactions_25.05.2022	6.00084e-10	2.03428e-07	1.84981e-17	5.54942e-16	[-1]	Group22	12.9032	8	[H2AC12, H2AC13, H2AC15, H2AC21, H2AC6, H2AC7, H2AW, H3C14]
R-HSA:176700	Incorporation Of Extended And Processed Telomere End Into Higher Order T-Loop And Associated Protein Structure	REACTOME_Reactions_25.05.2022	5.13146e-06	0.000836427	1.44233e-08	1.58657e-07	[-1]	Group23	9.61539	5	[H2AC6, H2AC7, H2AJ, H2AX, H3-4]
R-HSA:181450	Incorporation Of Extended And Processed Telomere End Into Associated Protein Structure	REACTOME_Reactions_25.05.2022	5.13146e-06	0.000836427	1.44233e-08	1.58657e-07	[-1]	Group23	9.61539	5	[H2AC6, H2AC7, H2AJ, H2AX, H3-4]
R-HSA:3451147	KAT5 HAT complex acetylates TCF4 gene at histone H4	REACTOME_Reactions_25.05.2022	6.19673e-06	0.000941903	1.44233e-08	1.58657e-07	[-1]	Group23	9.25926	5	[H2AC6, H2AC7, H2AJ, H2AX, H3-4]
R-HSA:3785711	Telomere shortening during replicative exhaustion	REACTOME_Reactions_25.05.2022	5.13146e-06	0.000836427	1.44233e-08	1.58657e-07	[-1]	Group23	9.61539	5	[H2AC6, H2AC7, H2AJ, H2AX, H3-4]
R-HSA:5216234	PRMT5:pT5-WDR77 methylates arginine-4 of histone H2A (H2AR3)	REACTOME_Reactions_25.05.2022	3.9715e-10	1.3662e-07	1.44233e-08	1.58657e-07	[-1]	Group23	30	6	[CDK4, H2AC12, H2AC6, H2AC7, H2AJ, H2AX]
R-HSA:5682858	RNF8 and RNF168 ubiquitinate H2AFX	REACTOME_Reactions_25.05.2022	0.000124656	0.00947388	1.44233e-08	1.58657e-07	[-1]	Group23	7.54717	4	[H2AX, H3-4, RPS27A, UBA52]
R-HSA:5683077	RNF8 and RNF168 ubiquitinate KDM4A,B	REACTOME_Reactions_25.05.2022	0.000124656	0.00947388	1.44233e-08	1.58657e-07	[-1]	Group23	7.54717	4	[H2AX, H3-4, RPS27A, UBA52]
R-HSA:5684071	RNF4 ubiquitinates MDC1	REACTOME_Reactions_25.05.2022	0.000202297	0.0141608	1.44233e-08	1.58657e-07	[-1]	Group23	6.66667	4	[H2AX, H3-4, RPS27A, UBA52]
R-HSA:912408	Telomeres cluster at the nuclear membrane	REACTOME_Reactions_25.05.2022	1.93647e-05	0.00238186	1.44233e-08	1.58657e-07	[-1]	Group23	7.35294	5	[H2AC6, H2AC7, H2AJ, H2AX, H3-4]
R-HSA:912458	Formation of meiotic heteroduplex	REACTOME_Reactions_25.05.2022	0.00133604	0.0334009	1.44233e-08	1.58657e-07	[-1]	Group23	6.66667	3	[CDK4, H2AX, H3-4]
R-HSA:912496	Formation of meiotic holliday junction	REACTOME_Reactions_25.05.2022	0.00142428	0.0341826	1.44233e-08	1.58657e-07	[-1]	Group23	6.52174	3	[CDK4, H2AX, H3-4]
R-HSA:912503	Formation of meiotic single-stranded DNA invasion complex	REACTOME_Reactions_25.05.2022	0.00125132	0.0337857	1.44233e-08	1.58657e-07	[-1]	Group23	6.81818	3	[CDK4, H2AX, H3-4]
R-HSA:9629195	NEIL3 recognizes and binds to 5-guanidinohydantoin (Gh) in telomeric DNA	REACTOME_Reactions_25.05.2022	5.64443e-06	0.00089182	1.44233e-08	1.58657e-07	[-1]	Group23	9.43396	5	[H2AC6, H2AC7, H2AJ, H2AX, H3-4]
R-HSA:9629216	NEIL3 cleaves 5-guanidinohydantoin (Gh) from damaged telomeric DNA	REACTOME_Reactions_25.05.2022	5.64443e-06	0.00089182	1.44233e-08	1.58657e-07	[-1]	Group23	9.43396	5	[H2AC6, H2AC7, H2AJ, H2AX, H3-4]
R-HSA:9629372	NEIL3 recognizes and binds to thymine glycol in telomeric DNA	REACTOME_Reactions_25.05.2022	5.64443e-06	0.00089182	1.44233e-08	1.58657e-07	[-1]	Group23	9.43396	5	[H2AC6, H2AC7, H2AJ, H2AX, H3-4]
R-HSA:9629373	NEIL3 recognizes and binds to spiroiminodihydantoin in telomeric DNA	REACTOME_Reactions_25.05.2022	5.64443e-06	0.00089182	1.44233e-08	1.58657e-07	[-1]	Group23	9.43396	5	[H2AC6, H2AC7, H2AJ, H2AX, H3-4]
R-HSA:9629483	NEIL3 cleaves spiroiminodihydantoin from damaged telomeric DNA	REACTOME_Reactions_25.05.2022	5.64443e-06	0.00089182	1.44233e-08	1.58657e-07	[-1]	Group23	9.43396	5	[H2AC6, H2AC7, H2AJ, H2AX, H3-4]
R-HSA:9629497	NEIL3 cleaves thymine glycol from telomeric DNA	REACTOME_Reactions_25.05.2022	5.64443e-06	0.00089182	1.44233e-08	1.58657e-07	[-1]	Group23	9.43396	5	[H2AC6, H2AC7, H2AJ, H2AX, H3-4]
R-HSA:9670101	ATRX:DAXX binds to subtelomeric chromosomal regions	REACTOME_Reactions_25.05.2022	6.19673e-06	0.000941903	1.44233e-08	1.58657e-07	[-1]	Group23	9.25926	5	[H2AC6, H2AC7, H2AJ, H2AX, H3-4]
R-HSA:9670114	Histone H3.3 deposition at telomere	REACTOME_Reactions_25.05.2022	2.89253e-07	6.971e-05	1.44233e-08	1.58657e-07	[-1]	Group23	10.7143	6	[H2AC6, H2AC7, H2AJ, H2AX, H3-3A, H3-4]
R-HSA:109699	PI3K-containing complexes phosphorylate PIP2 to PIP3	REACTOME_Reactions_25.05.2022	3.68721e-05	0.00394531	1.36226e-16	3.81432e-15	[-1]	Group24	10.2564	4	[FGFR1, FGFR2, FGFR3, FGFR4]
R-HSA:2316434	PI3K phosphorylates PIP2 to PIP3	REACTOME_Reactions_25.05.2022	1.7813e-07	4.48887e-05	1.36226e-16	3.81432e-15	[-1]	Group24	8.23529	7	[FGFR1, FGFR2, FGFR3, FGFR4, FYN, LCK, RAC1]
R-HSA:2400009	PI3K inhibitors block PI3K catalytic activity	REACTOME_Reactions_25.05.2022	9.79978e-08	2.58714e-05	1.36226e-16	3.81432e-15	[-1]	Group24	8.97436	7	[FGFR1, FGFR2, FGFR3, FGFR4, FYN, LCK, RAC1]
R-HSA:388833	Phosphorylation of CTLA-4	REACTOME_Reactions_25.05.2022	1.39637e-08	4.11928e-06	1.36226e-16	3.81432e-15	[-1]	Group24	29.4118	5	[FYN, LCK, LYN, PPP2CA, YES1]
R-HSA:389348	Activation of Rac1 by pVav1	REACTOME_Reactions_25.05.2022	6.00143e-06	0.00092422	1.36226e-16	3.81432e-15	[-1]	Group24	37.5	3	[FYN, LCK, RAC1]
R-HSA:5672965	RAS GEFs promote RAS nucleotide exchange	REACTOME_Reactions_25.05.2022	7.06213e-09	2.14689e-06	1.36226e-16	3.81432e-15	[-1]	Group24	7.43802	9	[FGFR1, FGFR2, FGFR3, FGFR4, FYN, HRAS, KRAS, NRAS, TEK]
R-HSA:2029459	Sequestering and phosphorylation Fc gamma receptors in the lipid rafts	REACTOME_Reactions_25.05.2022	1.06672e-09	3.52017e-07	4.27999e-14	8.55999e-13	[-1]	Group25	45.4545	5	[FGR, FYN, HCK, LYN, YES1]
R-HSA:5624486	SFKs phosphorylates RAF1 on Y340,Y341	REACTOME_Reactions_25.05.2022	1.41208e-11	5.11174e-09	4.27999e-14	8.55999e-13	[-1]	Group25	83.3333	5	[FYN, HRAS, KRAS, LYN, NRAS]
R-HSA:879917	CBL, GRB2, FYN and PI3K p85 subunit are constitutively associated	REACTOME_Reactions_25.05.2022	3.52903e-07	8.29321e-05	4.27999e-14	8.55999e-13	[-1]	Group25	30.7692	4	[FYN, HCK, LYN, YES1]
R-HSA:9029158	EPO:phospho-EPOR:phospho-JAK2:LYN:IRS2:phospho-CRKL:RAPGEF1:GRB2-1:SOS1,phospho-VAV1 mediates exchange of GTP for GDP bound to RAS	REACTOME_Reactions_25.05.2022	4.92236e-07	0.000111738	4.27999e-14	8.55999e-13	[-1]	Group25	28.5714	4	[HRAS, KRAS, LYN, NRAS]
R-HSA:912627	CBL ubiquitinates PI3K	REACTOME_Reactions_25.05.2022	1.28297e-10	4.51607e-08	4.27999e-14	8.55999e-13	[-1]	Group25	35.2941	6	[FYN, HCK, LYN, RPS27A, UBA52, YES1]
R-HSA:912629	CBL is tyrosine phosphorylated	REACTOME_Reactions_25.05.2022	3.52903e-07	8.29321e-05	4.27999e-14	8.55999e-13	[-1]	Group25	30.7692	4	[FYN, HCK, LYN, YES1]
R-HSA:9664261	Src phosphorylate SYK in IgG:Leishmania surface:p-FCGR3A:SYK	REACTOME_Reactions_25.05.2022	5.84074e-10	1.98585e-07	4.27999e-14	8.55999e-13	[-1]	Group25	50	5	[FGR, FYN, HCK, LYN, YES1]
R-HSA:9664275	Src phosphorylates CD3 dimers in IgG:Lma antigens:FCGR3A:CD3 dimers	REACTOME_Reactions_25.05.2022	2.93156e-10	1.01432e-07	4.27999e-14	8.55999e-13	[-1]	Group25	55.5556	5	[FGR, FYN, HCK, LYN, YES1]
R-HSA:9674816	p-Y546,Y584-PTPN11 (in CSF3 dimer:2xp-4Y-CSF3R:LYN:p-Y-JAK1:p-JAK2:p-SYK:p-HCK:p-TYK2:SHC:GRB2:PTPN11) dephosphorylates KRAS	REACTOME_Reactions_25.05.2022	3.01168e-05	0.00334297	4.27999e-14	8.55999e-13	[-1]	Group25	23.0769	3	[HCK, KRAS, LYN]
R-HSA:9705738	SOCS1,3 ubiquitinates CSF3R in SOCS1,3:p-4Y-CSF3R:CSF3 dimer:LYN:p-Y-JAK1:p-JAK2:p-SYK:p-HCK:p-TYK2:CUL5:ELOB:ELOC:RNF7	REACTOME_Reactions_25.05.2022	2.86774e-06	0.000507591	4.27999e-14	8.55999e-13	[-1]	Group25	19.0476	4	[HCK, LYN, RPS27A, UBA52]
R-HSA:983709	LYN, FYN, BLK phosphorylate ITAMs of Ig-alpha (CD79A) and Ig-beta (CD79B)	REACTOME_Reactions_25.05.2022	3.76409e-06	0.000639895	4.27999e-14	8.55999e-13	[-1]	Group25	42.8571	3	[BLK, FYN, LYN]
R-HSA:2316434	PI3K phosphorylates PIP2 to PIP3	REACTOME_Reactions_25.05.2022	1.7813e-07	4.48887e-05	3.09058e-14	6.49021e-13	[-1]	Group26	8.23529	7	[FGFR1, FGFR2, FGFR3, FGFR4, FYN, LCK, RAC1]
R-HSA:2400009	PI3K inhibitors block PI3K catalytic activity	REACTOME_Reactions_25.05.2022	9.79978e-08	2.58714e-05	3.09058e-14	6.49021e-13	[-1]	Group26	8.97436	7	[FGFR1, FGFR2, FGFR3, FGFR4, FYN, LCK, RAC1]
R-HSA:5672965	RAS GEFs promote RAS nucleotide exchange	REACTOME_Reactions_25.05.2022	7.06213e-09	2.14689e-06	3.09058e-14	6.49021e-13	[-1]	Group26	7.43802	9	[FGFR1, FGFR2, FGFR3, FGFR4, FYN, HRAS, KRAS, NRAS, TEK]
R-HSA:5674022	BRAP autoubiquitinates	REACTOME_Reactions_25.05.2022	1.3079e-10	4.59074e-08	3.09058e-14	6.49021e-13	[-1]	Group26	62.5	5	[HRAS, KRAS, NRAS, RPS27A, UBA52]
R-HSA:5675431	PP2A dephosphorylates RAF1	REACTOME_Reactions_25.05.2022	1.39637e-08	4.11928e-06	3.09058e-14	6.49021e-13	[-1]	Group26	29.4118	5	[HRAS, KRAS, NRAS, PPP2CA, YWHAB]
R-HSA:139899	Sequestration of BAD protein by 14-3-3	REACTOME_Reactions_25.05.2022	1.3079e-10	4.59074e-08	1.17968e-17	3.65701e-16	[-1]	Group27	62.5	5	[SFN, YWHAB, YWHAG, YWHAH, YWHAZ]
R-HSA:139906	Activation of BAD by calcineurin	REACTOME_Reactions_25.05.2022	5.84074e-10	1.98585e-07	1.17968e-17	3.65701e-16	[-1]	Group27	50	5	[SFN, YWHAB, YWHAG, YWHAH, YWHAZ]
R-HSA:1445149	14-3-3 binds p-5S,T642-AS160 (TBC1D4)	REACTOME_Reactions_25.05.2022	2.93156e-10	1.01432e-07	1.17968e-17	3.65701e-16	[-1]	Group27	55.5556	5	[SFN, YWHAB, YWHAG, YWHAH, YWHAZ]
R-HSA:1454689	14-3-3 Binds p-S237-TBC1D1	REACTOME_Reactions_25.05.2022	1.3079e-10	4.59074e-08	1.17968e-17	3.65701e-16	[-1]	Group27	62.5	5	[SFN, YWHAB, YWHAG, YWHAH, YWHAZ]
R-HSA:5632732	p-S939,T1462-TSC2 binding to 14-3-3 dimer is negatively regulated by DDIT4	REACTOME_Reactions_25.05.2022	2.93156e-10	1.01432e-07	1.17968e-17	3.65701e-16	[-1]	Group27	55.5556	5	[SFN, YWHAB, YWHAG, YWHAH, YWHAZ]
R-HSA:5632738	DDIT4 binds 14-3-3 dimer	REACTOME_Reactions_25.05.2022	1.3079e-10	4.59074e-08	1.17968e-17	3.65701e-16	[-1]	Group27	62.5	5	[SFN, YWHAB, YWHAG, YWHAH, YWHAZ]
R-HSA:5682858	RNF8 and RNF168 ubiquitinate H2AFX	REACTOME_Reactions_25.05.2022	0.000124656	0.00947388	1.17968e-17	3.65701e-16	[-1]	Group27	7.54717	4	[H2AX, H3-4, RPS27A, UBA52]
R-HSA:5683077	RNF8 and RNF168 ubiquitinate KDM4A,B	REACTOME_Reactions_25.05.2022	0.000124656	0.00947388	1.17968e-17	3.65701e-16	[-1]	Group27	7.54717	4	[H2AX, H3-4, RPS27A, UBA52]
R-HSA:5684071	RNF4 ubiquitinates MDC1	REACTOME_Reactions_25.05.2022	0.000202297	0.0141608	1.17968e-17	3.65701e-16	[-1]	Group27	6.66667	4	[H2AX, H3-4, RPS27A, UBA52]
R-HSA:75016	Association of p-S216-CDC25C with 14-3-3 proteins	REACTOME_Reactions_25.05.2022	1.3079e-10	4.59074e-08	1.17968e-17	3.65701e-16	[-1]	Group27	62.5	5	[SFN, YWHAB, YWHAG, YWHAH, YWHAZ]
R-HSA:9018017	RB1 binds and inhibits E2F1/2/3:DP1/2 complexes	REACTOME_Reactions_25.05.2022	7.06089e-05	0.00649602	1.17968e-17	3.65701e-16	[-1]	Group27	17.6471	3	[CDK2, CDK4, CDK6]
R-HSA:9614423	14-3-3 proteins bind AKT-phosphorylated FOXO1	REACTOME_Reactions_25.05.2022	1.08304e-06	0.00022094	1.17968e-17	3.65701e-16	[-1]	Group27	60	3	[YWHAB, YWHAG, YWHAZ]
R-HSA:9659782	Defective RB1 does not bind E2F1,(E2F2,E2F3)	REACTOME_Reactions_25.05.2022	7.06089e-05	0.00649602	1.17968e-17	3.65701e-16	[-1]	Group27	17.6471	3	[CDK2, CDK4, CDK6]
R-HSA:9729500	SARS-CoV-2 N binds to 14-3-3 proteins	REACTOME_Reactions_25.05.2022	4.92343e-11	1.75766e-08	1.17968e-17	3.65701e-16	[-1]	Group27	71.4286	5	[SFN, YWHAB, YWHAG, YWHAH, YWHAZ]
R-HSA:109699	PI3K-containing complexes phosphorylate PIP2 to PIP3	REACTOME_Reactions_25.05.2022	3.68721e-05	0.00394531	1.63598e-13	3.10836e-12	[-1]	Group28	10.2564	4	[FGFR1, FGFR2, FGFR3, FGFR4]
R-HSA:210977	Sos-mediated nucleotide exchange of Ras (Tie2 receptor:Grb2:Sos)	REACTOME_Reactions_25.05.2022	1.76636e-08	5.10478e-06	1.63598e-13	3.10836e-12	[-1]	Group28	57.1429	4	[HRAS, KRAS, NRAS, TEK]
R-HSA:2316434	PI3K phosphorylates PIP2 to PIP3	REACTOME_Reactions_25.05.2022	1.7813e-07	4.48887e-05	1.63598e-13	3.10836e-12	[-1]	Group28	8.23529	7	[FGFR1, FGFR2, FGFR3, FGFR4, FYN, LCK, RAC1]
R-HSA:2400009	PI3K inhibitors block PI3K catalytic activity	REACTOME_Reactions_25.05.2022	9.79978e-08	2.58714e-05	1.63598e-13	3.10836e-12	[-1]	Group28	8.97436	7	[FGFR1, FGFR2, FGFR3, FGFR4, FYN, LCK, RAC1]
R-HSA:5654392	Activated FGFR1:p-FRS:GRB2:SOS1 activates RAS nucleotide exchange	REACTOME_Reactions_25.05.2022	3.49206e-06	0.000600635	1.63598e-13	3.10836e-12	[-1]	Group28	18.1818	4	[FGFR1, HRAS, KRAS, NRAS]
R-HSA:5654402	Activated FGFR2:p-SHC1:GRB2:SOS1 activates RAS nucleotide exchange	REACTOME_Reactions_25.05.2022	4.21161e-06	0.000711763	1.63598e-13	3.10836e-12	[-1]	Group28	17.3913	4	[FGFR2, HRAS, KRAS, NRAS]
R-HSA:5654413	Activated FGFR3:p-FRS2:GRB2:SOS1 activates RAS nucleotide exchange	REACTOME_Reactions_25.05.2022	1.87101e-06	0.00034988	1.63598e-13	3.10836e-12	[-1]	Group28	21.0526	4	[FGFR3, HRAS, KRAS, NRAS]
R-HSA:5654426	Activated FGFR4:p-SHC1:GRB2:SOS1 activates RAS nucleotide exchange	REACTOME_Reactions_25.05.2022	2.33012e-06	0.000421752	1.63598e-13	3.10836e-12	[-1]	Group28	20	4	[FGFR4, HRAS, KRAS, NRAS]
R-HSA:5654600	Activated FGFR1:p-SHC1:GRB2:SOS1 activates RAS nucleotide exchange	REACTOME_Reactions_25.05.2022	2.86774e-06	0.000507591	1.63598e-13	3.10836e-12	[-1]	Group28	19.0476	4	[FGFR1, HRAS, KRAS, NRAS]
R-HSA:5654618	Activated FGFR2:p-FRS2:GRB2:SOS1 activates RAS nucleotide exchange	REACTOME_Reactions_25.05.2022	5.03526e-06	0.000825782	1.63598e-13	3.10836e-12	[-1]	Group28	16.6667	4	[FGFR2, HRAS, KRAS, NRAS]
R-HSA:5654647	Activated FGFR3:p-SHC1:GRB2:SOS1 activates RAS nucleotide exchange	REACTOME_Reactions_25.05.2022	1.4826e-06	0.000286141	1.63598e-13	3.10836e-12	[-1]	Group28	22.2222	4	[FGFR3, HRAS, KRAS, NRAS]
R-HSA:5654663	Activated FGFR4:p-FRS2:GRB2:SOS1 activates RAS nucleotide exchange	REACTOME_Reactions_25.05.2022	2.86774e-06	0.000507591	1.63598e-13	3.10836e-12	[-1]	Group28	19.0476	4	[FGFR4, HRAS, KRAS, NRAS]
R-HSA:5655241	Activated FGFR2 mutants:p-FRS2:GRB2:SOS1 activates RAS nucleotide exchange	REACTOME_Reactions_25.05.2022	4.21161e-06	0.000711763	1.63598e-13	3.10836e-12	[-1]	Group28	17.3913	4	[FGFR2, HRAS, KRAS, NRAS]
R-HSA:5655277	Activated FGFR3 point, translocation and fusion mutants:p-FRS2:GRB2:SOS1 activates RAS nucleotide exchange	REACTOME_Reactions_25.05.2022	1.4826e-06	0.000286141	1.63598e-13	3.10836e-12	[-1]	Group28	22.2222	4	[FGFR3, HRAS, KRAS, NRAS]
R-HSA:5655326	Activated FGFR1 mutants:p-FRS2:GRB2:SOS1 activates RAS nucleotide exchange	REACTOME_Reactions_25.05.2022	1.87101e-06	0.00034988	1.63598e-13	3.10836e-12	[-1]	Group28	21.0526	4	[FGFR1, HRAS, KRAS, NRAS]
R-HSA:5655347	Activated FGFR4 mutants:p-FRS2:GRB2:SOS1 activates RAS nucleotide exchange	REACTOME_Reactions_25.05.2022	1.76636e-08	5.10478e-06	1.63598e-13	3.10836e-12	[-1]	Group28	57.1429	4	[FGFR4, HRAS, KRAS, NRAS]
R-HSA:5672965	RAS GEFs promote RAS nucleotide exchange	REACTOME_Reactions_25.05.2022	7.06213e-09	2.14689e-06	1.63598e-13	3.10836e-12	[-1]	Group28	7.43802	9	[FGFR1, FGFR2, FGFR3, FGFR4, FYN, HRAS, KRAS, NRAS, TEK]
R-HSA:8941613	Activated FGFR4:p-FRS:p-PTPN11 activates RAS nucleotide exchange	REACTOME_Reactions_25.05.2022	2.33012e-06	0.000421752	1.63598e-13	3.10836e-12	[-1]	Group28	20	4	[FGFR4, HRAS, KRAS, NRAS]
R-HSA:8941618	Activated FGFR2:p-FRS:p-PTPN11 activates RAS nucleotide exchange	REACTOME_Reactions_25.05.2022	4.21161e-06	0.000711763	1.63598e-13	3.10836e-12	[-1]	Group28	17.3913	4	[FGFR2, HRAS, KRAS, NRAS]
R-HSA:8941623	Activated FGFR1:p-FRS:p-PTPN11 activates RAS nucleotide exchange	REACTOME_Reactions_25.05.2022	2.86774e-06	0.000507591	1.63598e-13	3.10836e-12	[-1]	Group28	19.0476	4	[FGFR1, HRAS, KRAS, NRAS]
R-HSA:8941628	Activated FGFR3:p-FRS:p-PTPN11 activates RAS nucleotide exchange	REACTOME_Reactions_25.05.2022	1.4826e-06	0.000286141	1.63598e-13	3.10836e-12	[-1]	Group28	22.2222	4	[FGFR3, HRAS, KRAS, NRAS]
R-HSA:139899	Sequestration of BAD protein by 14-3-3	REACTOME_Reactions_25.05.2022	1.3079e-10	4.59074e-08	2.78916e-15	6.41507e-14	[-1]	Group29	62.5	5	[SFN, YWHAB, YWHAG, YWHAH, YWHAZ]
R-HSA:139906	Activation of BAD by calcineurin	REACTOME_Reactions_25.05.2022	5.84074e-10	1.98585e-07	2.78916e-15	6.41507e-14	[-1]	Group29	50	5	[SFN, YWHAB, YWHAG, YWHAH, YWHAZ]
R-HSA:1445149	14-3-3 binds p-5S,T642-AS160 (TBC1D4)	REACTOME_Reactions_25.05.2022	2.93156e-10	1.01432e-07	2.78916e-15	6.41507e-14	[-1]	Group29	55.5556	5	[SFN, YWHAB, YWHAG, YWHAH, YWHAZ]
R-HSA:1454689	14-3-3 Binds p-S237-TBC1D1	REACTOME_Reactions_25.05.2022	1.3079e-10	4.59074e-08	2.78916e-15	6.41507e-14	[-1]	Group29	62.5	5	[SFN, YWHAB, YWHAG, YWHAH, YWHAZ]
R-HSA:5632732	p-S939,T1462-TSC2 binding to 14-3-3 dimer is negatively regulated by DDIT4	REACTOME_Reactions_25.05.2022	2.93156e-10	1.01432e-07	2.78916e-15	6.41507e-14	[-1]	Group29	55.5556	5	[SFN, YWHAB, YWHAG, YWHAH, YWHAZ]
R-HSA:5632738	DDIT4 binds 14-3-3 dimer	REACTOME_Reactions_25.05.2022	1.3079e-10	4.59074e-08	2.78916e-15	6.41507e-14	[-1]	Group29	62.5	5	[SFN, YWHAB, YWHAG, YWHAH, YWHAZ]
R-HSA:5672950	"Activator" RAF:YWHAB dimer binds RAS:GTP	REACTOME_Reactions_25.05.2022	6.3119e-08	1.71053e-05	2.78916e-15	6.41507e-14	[-1]	Group29	44.4444	4	[HRAS, KRAS, NRAS, YWHAB]
R-HSA:5672966	RAS:GTP:'activator' RAF homo/heterodimerizes with other RAF monomers	REACTOME_Reactions_25.05.2022	1.6409e-07	4.1843e-05	2.78916e-15	6.41507e-14	[-1]	Group29	36.3636	4	[HRAS, KRAS, NRAS, YWHAB]
R-HSA:5672969	Phosphorylation of RAF	REACTOME_Reactions_25.05.2022	2.33012e-06	0.000421752	2.78916e-15	6.41507e-14	[-1]	Group29	20	4	[HRAS, KRAS, NRAS, YWHAB]
R-HSA:5672972	MAP2Ks and MAPKs bind to the activated RAF complex	REACTOME_Reactions_25.05.2022	2.67008e-05	0.00304389	2.78916e-15	6.41507e-14	[-1]	Group29	11.1111	4	[HRAS, KRAS, NRAS, YWHAB]
R-HSA:5672973	MAP2Ks phosphorylate MAPKs	REACTOME_Reactions_25.05.2022	2.3822e-05	0.00281099	2.78916e-15	6.41507e-14	[-1]	Group29	11.4286	4	[HRAS, KRAS, NRAS, YWHAB]
R-HSA:5672978	RAF phosphorylates MAP2K dimer	REACTOME_Reactions_25.05.2022	2.3822e-05	0.00281099	2.78916e-15	6.41507e-14	[-1]	Group29	11.4286	4	[HRAS, KRAS, NRAS, YWHAB]
R-HSA:5672980	Dissociation of RAS:RAF complex	REACTOME_Reactions_25.05.2022	2.3822e-05	0.00281099	2.78916e-15	6.41507e-14	[-1]	Group29	11.4286	4	[HRAS, KRAS, NRAS, YWHAB]
R-HSA:5675417	PEBP1 binds activated RAF1	REACTOME_Reactions_25.05.2022	6.3119e-08	1.71053e-05	2.78916e-15	6.41507e-14	[-1]	Group29	44.4444	4	[HRAS, KRAS, NRAS, YWHAB]
R-HSA:5675431	PP2A dephosphorylates RAF1	REACTOME_Reactions_25.05.2022	1.39637e-08	4.11928e-06	2.78916e-15	6.41507e-14	[-1]	Group29	29.4118	5	[HRAS, KRAS, NRAS, PPP2CA, YWHAB]
R-HSA:5675433	PP5 dephosphorylates RAF1 S338	REACTOME_Reactions_25.05.2022	6.3119e-08	1.71053e-05	2.78916e-15	6.41507e-14	[-1]	Group29	44.4444	4	[HRAS, KRAS, NRAS, YWHAB]
R-HSA:6802908	RAS mutants bind inactive RAF	REACTOME_Reactions_25.05.2022	1.76636e-08	5.10478e-06	2.78916e-15	6.41507e-14	[-1]	Group29	57.1429	4	[HRAS, KRAS, NRAS, YWHAB]
R-HSA:6802912	High kinase activity BRAF mutants bind MAP2Ks and MAPKs	REACTOME_Reactions_25.05.2022	2.67008e-05	0.00304389	2.78916e-15	6.41507e-14	[-1]	Group29	11.1111	4	[HRAS, KRAS, NRAS, YWHAB]
R-HSA:6802914	RAS:GTP:moderate kinase activity p-RAF complexes bind MAP2Ks and MAPKs	REACTOME_Reactions_25.05.2022	2.67008e-05	0.00304389	2.78916e-15	6.41507e-14	[-1]	Group29	11.1111	4	[HRAS, KRAS, NRAS, YWHAB]
R-HSA:6802916	RAF is phosphorylated downstream of moderate kinase activity BRAF mutants	REACTOME_Reactions_25.05.2022	1.4826e-06	0.000286141	2.78916e-15	6.41507e-14	[-1]	Group29	22.2222	4	[HRAS, KRAS, NRAS, YWHAB]
R-HSA:6802918	Activated MAP2Ks phosphorylate MAPKs downstream of inactive BRAF mutants	REACTOME_Reactions_25.05.2022	2.11776e-05	0.00256249	2.78916e-15	6.41507e-14	[-1]	Group29	11.7647	4	[HRAS, KRAS, NRAS, YWHAB]
R-HSA:6802919	RAS:GTP:moderate kinase activity p-RAF complexes phosphorylate MAP2Ks	REACTOME_Reactions_25.05.2022	2.11776e-05	0.00256249	2.78916e-15	6.41507e-14	[-1]	Group29	11.7647	4	[HRAS, KRAS, NRAS, YWHAB]
R-HSA:6802921	Activated MAP2Ks phosphorylate MAPKs downstream of moderate kinase activity BRAF mutants	REACTOME_Reactions_25.05.2022	2.11776e-05	0.00256249	2.78916e-15	6.41507e-14	[-1]	Group29	11.7647	4	[HRAS, KRAS, NRAS, YWHAB]
R-HSA:6802922	Activated MAP2Ks phosphorylate MAPKs downstream of oncogenic RAS	REACTOME_Reactions_25.05.2022	2.11776e-05	0.00256249	2.78916e-15	6.41507e-14	[-1]	Group29	11.7647	4	[HRAS, KRAS, NRAS, YWHAB]
R-HSA:6802924	RAF is phosphorylated downstream of oncogenic RAS	REACTOME_Reactions_25.05.2022	1.4826e-06	0.000286141	2.78916e-15	6.41507e-14	[-1]	Group29	22.2222	4	[HRAS, KRAS, NRAS, YWHAB]
R-HSA:6802925	Mutant RAS:p-RAF complexes bind MAP2Ks and MAPKs	REACTOME_Reactions_25.05.2022	2.67008e-05	0.00304389	2.78916e-15	6.41507e-14	[-1]	Group29	11.1111	4	[HRAS, KRAS, NRAS, YWHAB]
R-HSA:6802926	Mutant RAS:p-RAF complexes phosphorylate MAP2Ks	REACTOME_Reactions_25.05.2022	2.11776e-05	0.00256249	2.78916e-15	6.41507e-14	[-1]	Group29	11.7647	4	[HRAS, KRAS, NRAS, YWHAB]
R-HSA:6802934	p-BRAF and RAF fusion dimers bind MAP2Ks and MAPKs	REACTOME_Reactions_25.05.2022	0.000189508	0.0134551	2.78916e-15	6.41507e-14	[-1]	Group29	6.77966	4	[HRAS, KRAS, NRAS, YWHAB]
R-HSA:6802941	RAF is paradoxically phosphorylated downstream of kinase-inactive RAF	REACTOME_Reactions_25.05.2022	1.4826e-06	0.000286141	2.78916e-15	6.41507e-14	[-1]	Group29	22.2222	4	[HRAS, KRAS, NRAS, YWHAB]
R-HSA:6802942	RAS:GTP:p-RAF complexes paradoxically bind MAP2Ks and MAPKs	REACTOME_Reactions_25.05.2022	2.67008e-05	0.00304389	2.78916e-15	6.41507e-14	[-1]	Group29	11.1111	4	[HRAS, KRAS, NRAS, YWHAB]
R-HSA:6802943	RAS:GTP:inactive p-RAF complexes phosphorylate MAP2Ks	REACTOME_Reactions_25.05.2022	2.11776e-05	0.00256249	2.78916e-15	6.41507e-14	[-1]	Group29	11.7647	4	[HRAS, KRAS, NRAS, YWHAB]
R-HSA:6803230	Dissociation of moderate activity BRAF complexes	REACTOME_Reactions_25.05.2022	2.11776e-05	0.00256249	2.78916e-15	6.41507e-14	[-1]	Group29	11.7647	4	[HRAS, KRAS, NRAS, YWHAB]
R-HSA:6803233	Dissociation of oncogenic RAS:RAF complex	REACTOME_Reactions_25.05.2022	2.11776e-05	0.00256249	2.78916e-15	6.41507e-14	[-1]	Group29	11.7647	4	[HRAS, KRAS, NRAS, YWHAB]
R-HSA:6803234	Dissociation of paradoxically activated RAS:BRAF complexes	REACTOME_Reactions_25.05.2022	2.11776e-05	0.00256249	2.78916e-15	6.41507e-14	[-1]	Group29	11.7647	4	[HRAS, KRAS, NRAS, YWHAB]
R-HSA:6803240	Homo- or heterodimerization of RAF downstream of mutant RAS	REACTOME_Reactions_25.05.2022	1.04809e-07	2.75648e-05	2.78916e-15	6.41507e-14	[-1]	Group29	40	4	[HRAS, KRAS, NRAS, YWHAB]
R-HSA:75016	Association of p-S216-CDC25C with 14-3-3 proteins	REACTOME_Reactions_25.05.2022	1.3079e-10	4.59074e-08	2.78916e-15	6.41507e-14	[-1]	Group29	62.5	5	[SFN, YWHAB, YWHAG, YWHAH, YWHAZ]
R-HSA:8936676	Moderate kinase activity BRAF mutants:RAS:GTP homo/heterodimerize	REACTOME_Reactions_25.05.2022	1.04809e-07	2.75648e-05	2.78916e-15	6.41507e-14	[-1]	Group29	40	4	[HRAS, KRAS, NRAS, YWHAB]
R-HSA:8936731	Inactive BRAF mutants:mutant RAS:GTP bind RAF1	REACTOME_Reactions_25.05.2022	1.04809e-07	2.75648e-05	2.78916e-15	6.41507e-14	[-1]	Group29	40	4	[HRAS, KRAS, NRAS, YWHAB]
R-HSA:9653108	Raf dimer inhibitors bind RAF heterodimers	REACTOME_Reactions_25.05.2022	6.3119e-08	1.71053e-05	2.78916e-15	6.41507e-14	[-1]	Group29	44.4444	4	[HRAS, KRAS, NRAS, YWHAB]
R-HSA:9656209	Dissociation of RAS:RAF1 mutant complex	REACTOME_Reactions_25.05.2022	2.3822e-05	0.00281099	2.78916e-15	6.41507e-14	[-1]	Group29	11.4286	4	[HRAS, KRAS, NRAS, YWHAB]
R-HSA:9656211	MAP2Ks and MAPKs bind to the activated mutant RAF1 complex	REACTOME_Reactions_25.05.2022	2.3822e-05	0.00281099	2.78916e-15	6.41507e-14	[-1]	Group29	11.4286	4	[HRAS, KRAS, NRAS, YWHAB]
R-HSA:9656212	Phosphorylation of RAF1 mutants	REACTOME_Reactions_25.05.2022	1.87101e-06	0.00034988	2.78916e-15	6.41507e-14	[-1]	Group29	21.0526	4	[HRAS, KRAS, NRAS, YWHAB]
R-HSA:9656213	RAF1 mutants show enhanced heterodimerization with BRAF	REACTOME_Reactions_25.05.2022	3.51964e-08	9.8198e-06	2.78916e-15	6.41507e-14	[-1]	Group29	50	4	[HRAS, KRAS, NRAS, YWHAB]
R-HSA:9656214	MAP2Ks phosphorylate MAPKs downstream of RAF1 mutants	REACTOME_Reactions_25.05.2022	2.3822e-05	0.00281099	2.78916e-15	6.41507e-14	[-1]	Group29	11.4286	4	[HRAS, KRAS, NRAS, YWHAB]
R-HSA:9656215	RAF1 mutant complexes phosphorylate MAP2K dimer	REACTOME_Reactions_25.05.2022	2.3822e-05	0.00281099	2.78916e-15	6.41507e-14	[-1]	Group29	11.4286	4	[HRAS, KRAS, NRAS, YWHAB]
R-HSA:9657599	Dual mechanism MAP2K inhibitors bind MAP2Ks	REACTOME_Reactions_25.05.2022	2.3822e-05	0.00281099	2.78916e-15	6.41507e-14	[-1]	Group29	11.4286	4	[HRAS, KRAS, NRAS, YWHAB]
R-HSA:9657603	Dual mechanism MAPK inhibitors bind MAPKs	REACTOME_Reactions_25.05.2022	2.3822e-05	0.00281099	2.78916e-15	6.41507e-14	[-1]	Group29	11.4286	4	[HRAS, KRAS, NRAS, YWHAB]
R-HSA:9657606	Single mechanism MAP2K inhibitors bind phosphorylated MAP2Ks	REACTOME_Reactions_25.05.2022	2.3822e-05	0.00281099	2.78916e-15	6.41507e-14	[-1]	Group29	11.4286	4	[HRAS, KRAS, NRAS, YWHAB]
R-HSA:9657608	Single mechanism MAPK inhibitors bind phosphorylated MAPK	REACTOME_Reactions_25.05.2022	2.3822e-05	0.00281099	2.78916e-15	6.41507e-14	[-1]	Group29	11.4286	4	[HRAS, KRAS, NRAS, YWHAB]
R-HSA:9729500	SARS-CoV-2 N binds to 14-3-3 proteins	REACTOME_Reactions_25.05.2022	4.92343e-11	1.75766e-08	2.78916e-15	6.41507e-14	[-1]	Group29	71.4286	5	[SFN, YWHAB, YWHAG, YWHAH, YWHAZ]
R-HSA:2029459	Sequestering and phosphorylation Fc gamma receptors in the lipid rafts	REACTOME_Reactions_25.05.2022	1.06672e-09	3.52017e-07	6.50036e-16	1.69009e-14	[-1]	Group30	45.4545	5	[FGR, FYN, HCK, LYN, YES1]
R-HSA:389348	Activation of Rac1 by pVav1	REACTOME_Reactions_25.05.2022	6.00143e-06	0.00092422	6.50036e-16	1.69009e-14	[-1]	Group30	37.5	3	[FYN, LCK, RAC1]
R-HSA:389350	Activation of Cdc42 by pVav1	REACTOME_Reactions_25.05.2022	6.00143e-06	0.00092422	6.50036e-16	1.69009e-14	[-1]	Group30	37.5	3	[CDC42, FYN, LCK]
R-HSA:3928628	VAV exchanges GTP for GDP on RAC1, activating it	REACTOME_Reactions_25.05.2022	1.10483e-05	0.00152467	6.50036e-16	1.69009e-14	[-1]	Group30	13.7931	4	[FYN, LYN, RAC1, YES1]
R-HSA:3928642	TIAM1 exchanges GTP for GDP on RAC1, activating it	REACTOME_Reactions_25.05.2022	2.33012e-06	0.000421752	6.50036e-16	1.69009e-14	[-1]	Group30	20	4	[FYN, LYN, RAC1, YES1]
R-HSA:3928651	NGEF exchanges GTP for GDP on RHOA	REACTOME_Reactions_25.05.2022	2.33012e-06	0.000421752	6.50036e-16	1.69009e-14	[-1]	Group30	20	4	[FYN, LYN, RHOA, YES1]
R-HSA:4093336	p-TIAM1 exchanges GTP for GDP on RAC1, activating it	REACTOME_Reactions_25.05.2022	8.88365e-07	0.000185668	6.50036e-16	1.69009e-14	[-1]	Group30	25	4	[FYN, LYN, RAC1, YES1]
R-HSA:442273	VAV1 is a GEF for Rho/Rac family GTPases	REACTOME_Reactions_25.05.2022	6.00143e-06	0.00092422	6.50036e-16	1.69009e-14	[-1]	Group30	37.5	3	[CDC42, RAC1, RHOA]
R-HSA:442291	VAV2 is a GEF for Rho/Rac family kinases	REACTOME_Reactions_25.05.2022	2.15848e-06	0.000395002	6.50036e-16	1.69009e-14	[-1]	Group30	50	3	[CDC42, RAC1, RHOA]
R-HSA:5625959	Activated RHOA, RHOG, RAC1 and CDC42 bind KTN1 (kinectin)	REACTOME_Reactions_25.05.2022	1.08304e-06	0.00022094	6.50036e-16	1.69009e-14	[-1]	Group30	60	3	[CDC42, RAC1, RHOA]
R-HSA:5672083	KTN1 binds Kinesin-1	REACTOME_Reactions_25.05.2022	1.74975e-05	0.00220468	6.50036e-16	1.69009e-14	[-1]	Group30	27.2727	3	[CDC42, RAC1, RHOA]
R-HSA:5672329	IQGAP1 binds CLIP1 and microtubules	REACTOME_Reactions_25.05.2022	4.52226e-08	1.2391e-05	6.50036e-16	1.69009e-14	[-1]	Group30	23.8095	5	[CDC42, RAC1, TUBA3C, TUBA3D, TUBA3E]
R-HSA:879917	CBL, GRB2, FYN and PI3K p85 subunit are constitutively associated	REACTOME_Reactions_25.05.2022	3.52903e-07	8.29321e-05	6.50036e-16	1.69009e-14	[-1]	Group30	30.7692	4	[FYN, HCK, LYN, YES1]
R-HSA:8942607	Tyrosine kinases phosphorylate Cip/Kip inhibitors bound to CDK4/6:CCND complexes	REACTOME_Reactions_25.05.2022	3.01168e-05	0.00334297	6.50036e-16	1.69009e-14	[-1]	Group30	23.0769	3	[CDK4, CDK6, LYN]
R-HSA:9018017	RB1 binds and inhibits E2F1/2/3:DP1/2 complexes	REACTOME_Reactions_25.05.2022	7.06089e-05	0.00649602	6.50036e-16	1.69009e-14	[-1]	Group30	17.6471	3	[CDK2, CDK4, CDK6]
R-HSA:912629	CBL is tyrosine phosphorylated	REACTOME_Reactions_25.05.2022	3.52903e-07	8.29321e-05	6.50036e-16	1.69009e-14	[-1]	Group30	30.7692	4	[FYN, HCK, LYN, YES1]
R-HSA:9659782	Defective RB1 does not bind E2F1,(E2F2,E2F3)	REACTOME_Reactions_25.05.2022	7.06089e-05	0.00649602	6.50036e-16	1.69009e-14	[-1]	Group30	17.6471	3	[CDK2, CDK4, CDK6]
R-HSA:9664261	Src phosphorylate SYK in IgG:Leishmania surface:p-FCGR3A:SYK	REACTOME_Reactions_25.05.2022	5.84074e-10	1.98585e-07	6.50036e-16	1.69009e-14	[-1]	Group30	50	5	[FGR, FYN, HCK, LYN, YES1]
R-HSA:9664275	Src phosphorylates CD3 dimers in IgG:Lma antigens:FCGR3A:CD3 dimers	REACTOME_Reactions_25.05.2022	2.93156e-10	1.01432e-07	6.50036e-16	1.69009e-14	[-1]	Group30	55.5556	5	[FGR, FYN, HCK, LYN, YES1]
R-HSA:9674816	p-Y546,Y584-PTPN11 (in CSF3 dimer:2xp-4Y-CSF3R:LYN:p-Y-JAK1:p-JAK2:p-SYK:p-HCK:p-TYK2:SHC:GRB2:PTPN11) dephosphorylates KRAS	REACTOME_Reactions_25.05.2022	3.01168e-05	0.00334297	6.50036e-16	1.69009e-14	[-1]	Group30	23.0769	3	[HCK, KRAS, LYN]
R-HSA:9705738	SOCS1,3 ubiquitinates CSF3R in SOCS1,3:p-4Y-CSF3R:CSF3 dimer:LYN:p-Y-JAK1:p-JAK2:p-SYK:p-HCK:p-TYK2:CUL5:ELOB:ELOC:RNF7	REACTOME_Reactions_25.05.2022	2.86774e-06	0.000507591	6.50036e-16	1.69009e-14	[-1]	Group30	19.0476	4	[HCK, LYN, RPS27A, UBA52]
R-HSA:109699	PI3K-containing complexes phosphorylate PIP2 to PIP3	REACTOME_Reactions_25.05.2022	3.68721e-05	0.00394531	1.37512e-14	3.02525e-13	[-1]	Group31	10.2564	4	[FGFR1, FGFR2, FGFR3, FGFR4]
R-HSA:210977	Sos-mediated nucleotide exchange of Ras (Tie2 receptor:Grb2:Sos)	REACTOME_Reactions_25.05.2022	1.76636e-08	5.10478e-06	1.37512e-14	3.02525e-13	[-1]	Group31	57.1429	4	[HRAS, KRAS, NRAS, TEK]
R-HSA:2316434	PI3K phosphorylates PIP2 to PIP3	REACTOME_Reactions_25.05.2022	1.7813e-07	4.48887e-05	1.37512e-14	3.02525e-13	[-1]	Group31	8.23529	7	[FGFR1, FGFR2, FGFR3, FGFR4, FYN, LCK, RAC1]
R-HSA:2400009	PI3K inhibitors block PI3K catalytic activity	REACTOME_Reactions_25.05.2022	9.79978e-08	2.58714e-05	1.37512e-14	3.02525e-13	[-1]	Group31	8.97436	7	[FGFR1, FGFR2, FGFR3, FGFR4, FYN, LCK, RAC1]
R-HSA:392054	NCAM1:pFAK:Grb2:Sos-mediated nucleotide exchange of Ras	REACTOME_Reactions_25.05.2022	8.88365e-07	0.000185668	1.37512e-14	3.02525e-13	[-1]	Group31	25	4	[FYN, HRAS, KRAS, NRAS]
R-HSA:5654392	Activated FGFR1:p-FRS:GRB2:SOS1 activates RAS nucleotide exchange	REACTOME_Reactions_25.05.2022	3.49206e-06	0.000600635	1.37512e-14	3.02525e-13	[-1]	Group31	18.1818	4	[FGFR1, HRAS, KRAS, NRAS]
R-HSA:5654402	Activated FGFR2:p-SHC1:GRB2:SOS1 activates RAS nucleotide exchange	REACTOME_Reactions_25.05.2022	4.21161e-06	0.000711763	1.37512e-14	3.02525e-13	[-1]	Group31	17.3913	4	[FGFR2, HRAS, KRAS, NRAS]
R-HSA:5654413	Activated FGFR3:p-FRS2:GRB2:SOS1 activates RAS nucleotide exchange	REACTOME_Reactions_25.05.2022	1.87101e-06	0.00034988	1.37512e-14	3.02525e-13	[-1]	Group31	21.0526	4	[FGFR3, HRAS, KRAS, NRAS]
R-HSA:5654426	Activated FGFR4:p-SHC1:GRB2:SOS1 activates RAS nucleotide exchange	REACTOME_Reactions_25.05.2022	2.33012e-06	0.000421752	1.37512e-14	3.02525e-13	[-1]	Group31	20	4	[FGFR4, HRAS, KRAS, NRAS]
R-HSA:5654600	Activated FGFR1:p-SHC1:GRB2:SOS1 activates RAS nucleotide exchange	REACTOME_Reactions_25.05.2022	2.86774e-06	0.000507591	1.37512e-14	3.02525e-13	[-1]	Group31	19.0476	4	[FGFR1, HRAS, KRAS, NRAS]
R-HSA:5654618	Activated FGFR2:p-FRS2:GRB2:SOS1 activates RAS nucleotide exchange	REACTOME_Reactions_25.05.2022	5.03526e-06	0.000825782	1.37512e-14	3.02525e-13	[-1]	Group31	16.6667	4	[FGFR2, HRAS, KRAS, NRAS]
R-HSA:5654647	Activated FGFR3:p-SHC1:GRB2:SOS1 activates RAS nucleotide exchange	REACTOME_Reactions_25.05.2022	1.4826e-06	0.000286141	1.37512e-14	3.02525e-13	[-1]	Group31	22.2222	4	[FGFR3, HRAS, KRAS, NRAS]
R-HSA:5654663	Activated FGFR4:p-FRS2:GRB2:SOS1 activates RAS nucleotide exchange	REACTOME_Reactions_25.05.2022	2.86774e-06	0.000507591	1.37512e-14	3.02525e-13	[-1]	Group31	19.0476	4	[FGFR4, HRAS, KRAS, NRAS]
R-HSA:5655241	Activated FGFR2 mutants:p-FRS2:GRB2:SOS1 activates RAS nucleotide exchange	REACTOME_Reactions_25.05.2022	4.21161e-06	0.000711763	1.37512e-14	3.02525e-13	[-1]	Group31	17.3913	4	[FGFR2, HRAS, KRAS, NRAS]
R-HSA:5655277	Activated FGFR3 point, translocation and fusion mutants:p-FRS2:GRB2:SOS1 activates RAS nucleotide exchange	REACTOME_Reactions_25.05.2022	1.4826e-06	0.000286141	1.37512e-14	3.02525e-13	[-1]	Group31	22.2222	4	[FGFR3, HRAS, KRAS, NRAS]
R-HSA:5655326	Activated FGFR1 mutants:p-FRS2:GRB2:SOS1 activates RAS nucleotide exchange	REACTOME_Reactions_25.05.2022	1.87101e-06	0.00034988	1.37512e-14	3.02525e-13	[-1]	Group31	21.0526	4	[FGFR1, HRAS, KRAS, NRAS]
R-HSA:5655347	Activated FGFR4 mutants:p-FRS2:GRB2:SOS1 activates RAS nucleotide exchange	REACTOME_Reactions_25.05.2022	1.76636e-08	5.10478e-06	1.37512e-14	3.02525e-13	[-1]	Group31	57.1429	4	[FGFR4, HRAS, KRAS, NRAS]
R-HSA:5672950	"Activator" RAF:YWHAB dimer binds RAS:GTP	REACTOME_Reactions_25.05.2022	6.3119e-08	1.71053e-05	1.37512e-14	3.02525e-13	[-1]	Group31	44.4444	4	[HRAS, KRAS, NRAS, YWHAB]
R-HSA:5672965	RAS GEFs promote RAS nucleotide exchange	REACTOME_Reactions_25.05.2022	7.06213e-09	2.14689e-06	1.37512e-14	3.02525e-13	[-1]	Group31	7.43802	9	[FGFR1, FGFR2, FGFR3, FGFR4, FYN, HRAS, KRAS, NRAS, TEK]
R-HSA:5672966	RAS:GTP:'activator' RAF homo/heterodimerizes with other RAF monomers	REACTOME_Reactions_25.05.2022	1.6409e-07	4.1843e-05	1.37512e-14	3.02525e-13	[-1]	Group31	36.3636	4	[HRAS, KRAS, NRAS, YWHAB]
R-HSA:5672969	Phosphorylation of RAF	REACTOME_Reactions_25.05.2022	2.33012e-06	0.000421752	1.37512e-14	3.02525e-13	[-1]	Group31	20	4	[HRAS, KRAS, NRAS, YWHAB]
R-HSA:5672972	MAP2Ks and MAPKs bind to the activated RAF complex	REACTOME_Reactions_25.05.2022	2.67008e-05	0.00304389	1.37512e-14	3.02525e-13	[-1]	Group31	11.1111	4	[HRAS, KRAS, NRAS, YWHAB]
R-HSA:5672973	MAP2Ks phosphorylate MAPKs	REACTOME_Reactions_25.05.2022	2.3822e-05	0.00281099	1.37512e-14	3.02525e-13	[-1]	Group31	11.4286	4	[HRAS, KRAS, NRAS, YWHAB]
R-HSA:5672978	RAF phosphorylates MAP2K dimer	REACTOME_Reactions_25.05.2022	2.3822e-05	0.00281099	1.37512e-14	3.02525e-13	[-1]	Group31	11.4286	4	[HRAS, KRAS, NRAS, YWHAB]
R-HSA:5672980	Dissociation of RAS:RAF complex	REACTOME_Reactions_25.05.2022	2.3822e-05	0.00281099	1.37512e-14	3.02525e-13	[-1]	Group31	11.4286	4	[HRAS, KRAS, NRAS, YWHAB]
R-HSA:5674022	BRAP autoubiquitinates	REACTOME_Reactions_25.05.2022	1.3079e-10	4.59074e-08	1.37512e-14	3.02525e-13	[-1]	Group31	62.5	5	[HRAS, KRAS, NRAS, RPS27A, UBA52]
R-HSA:5675417	PEBP1 binds activated RAF1	REACTOME_Reactions_25.05.2022	6.3119e-08	1.71053e-05	1.37512e-14	3.02525e-13	[-1]	Group31	44.4444	4	[HRAS, KRAS, NRAS, YWHAB]
R-HSA:5675431	PP2A dephosphorylates RAF1	REACTOME_Reactions_25.05.2022	1.39637e-08	4.11928e-06	1.37512e-14	3.02525e-13	[-1]	Group31	29.4118	5	[HRAS, KRAS, NRAS, PPP2CA, YWHAB]
R-HSA:5675433	PP5 dephosphorylates RAF1 S338	REACTOME_Reactions_25.05.2022	6.3119e-08	1.71053e-05	1.37512e-14	3.02525e-13	[-1]	Group31	44.4444	4	[HRAS, KRAS, NRAS, YWHAB]
R-HSA:6802908	RAS mutants bind inactive RAF	REACTOME_Reactions_25.05.2022	1.76636e-08	5.10478e-06	1.37512e-14	3.02525e-13	[-1]	Group31	57.1429	4	[HRAS, KRAS, NRAS, YWHAB]
R-HSA:6802912	High kinase activity BRAF mutants bind MAP2Ks and MAPKs	REACTOME_Reactions_25.05.2022	2.67008e-05	0.00304389	1.37512e-14	3.02525e-13	[-1]	Group31	11.1111	4	[HRAS, KRAS, NRAS, YWHAB]
R-HSA:6802914	RAS:GTP:moderate kinase activity p-RAF complexes bind MAP2Ks and MAPKs	REACTOME_Reactions_25.05.2022	2.67008e-05	0.00304389	1.37512e-14	3.02525e-13	[-1]	Group31	11.1111	4	[HRAS, KRAS, NRAS, YWHAB]
R-HSA:6802916	RAF is phosphorylated downstream of moderate kinase activity BRAF mutants	REACTOME_Reactions_25.05.2022	1.4826e-06	0.000286141	1.37512e-14	3.02525e-13	[-1]	Group31	22.2222	4	[HRAS, KRAS, NRAS, YWHAB]
R-HSA:6802918	Activated MAP2Ks phosphorylate MAPKs downstream of inactive BRAF mutants	REACTOME_Reactions_25.05.2022	2.11776e-05	0.00256249	1.37512e-14	3.02525e-13	[-1]	Group31	11.7647	4	[HRAS, KRAS, NRAS, YWHAB]
R-HSA:6802919	RAS:GTP:moderate kinase activity p-RAF complexes phosphorylate MAP2Ks	REACTOME_Reactions_25.05.2022	2.11776e-05	0.00256249	1.37512e-14	3.02525e-13	[-1]	Group31	11.7647	4	[HRAS, KRAS, NRAS, YWHAB]
R-HSA:6802921	Activated MAP2Ks phosphorylate MAPKs downstream of moderate kinase activity BRAF mutants	REACTOME_Reactions_25.05.2022	2.11776e-05	0.00256249	1.37512e-14	3.02525e-13	[-1]	Group31	11.7647	4	[HRAS, KRAS, NRAS, YWHAB]
R-HSA:6802922	Activated MAP2Ks phosphorylate MAPKs downstream of oncogenic RAS	REACTOME_Reactions_25.05.2022	2.11776e-05	0.00256249	1.37512e-14	3.02525e-13	[-1]	Group31	11.7647	4	[HRAS, KRAS, NRAS, YWHAB]
R-HSA:6802924	RAF is phosphorylated downstream of oncogenic RAS	REACTOME_Reactions_25.05.2022	1.4826e-06	0.000286141	1.37512e-14	3.02525e-13	[-1]	Group31	22.2222	4	[HRAS, KRAS, NRAS, YWHAB]
R-HSA:6802925	Mutant RAS:p-RAF complexes bind MAP2Ks and MAPKs	REACTOME_Reactions_25.05.2022	2.67008e-05	0.00304389	1.37512e-14	3.02525e-13	[-1]	Group31	11.1111	4	[HRAS, KRAS, NRAS, YWHAB]
R-HSA:6802926	Mutant RAS:p-RAF complexes phosphorylate MAP2Ks	REACTOME_Reactions_25.05.2022	2.11776e-05	0.00256249	1.37512e-14	3.02525e-13	[-1]	Group31	11.7647	4	[HRAS, KRAS, NRAS, YWHAB]
R-HSA:6802934	p-BRAF and RAF fusion dimers bind MAP2Ks and MAPKs	REACTOME_Reactions_25.05.2022	0.000189508	0.0134551	1.37512e-14	3.02525e-13	[-1]	Group31	6.77966	4	[HRAS, KRAS, NRAS, YWHAB]
R-HSA:6802941	RAF is paradoxically phosphorylated downstream of kinase-inactive RAF	REACTOME_Reactions_25.05.2022	1.4826e-06	0.000286141	1.37512e-14	3.02525e-13	[-1]	Group31	22.2222	4	[HRAS, KRAS, NRAS, YWHAB]
R-HSA:6802942	RAS:GTP:p-RAF complexes paradoxically bind MAP2Ks and MAPKs	REACTOME_Reactions_25.05.2022	2.67008e-05	0.00304389	1.37512e-14	3.02525e-13	[-1]	Group31	11.1111	4	[HRAS, KRAS, NRAS, YWHAB]
R-HSA:6802943	RAS:GTP:inactive p-RAF complexes phosphorylate MAP2Ks	REACTOME_Reactions_25.05.2022	2.11776e-05	0.00256249	1.37512e-14	3.02525e-13	[-1]	Group31	11.7647	4	[HRAS, KRAS, NRAS, YWHAB]
R-HSA:6803230	Dissociation of moderate activity BRAF complexes	REACTOME_Reactions_25.05.2022	2.11776e-05	0.00256249	1.37512e-14	3.02525e-13	[-1]	Group31	11.7647	4	[HRAS, KRAS, NRAS, YWHAB]
R-HSA:6803233	Dissociation of oncogenic RAS:RAF complex	REACTOME_Reactions_25.05.2022	2.11776e-05	0.00256249	1.37512e-14	3.02525e-13	[-1]	Group31	11.7647	4	[HRAS, KRAS, NRAS, YWHAB]
R-HSA:6803234	Dissociation of paradoxically activated RAS:BRAF complexes	REACTOME_Reactions_25.05.2022	2.11776e-05	0.00256249	1.37512e-14	3.02525e-13	[-1]	Group31	11.7647	4	[HRAS, KRAS, NRAS, YWHAB]
R-HSA:6803240	Homo- or heterodimerization of RAF downstream of mutant RAS	REACTOME_Reactions_25.05.2022	1.04809e-07	2.75648e-05	1.37512e-14	3.02525e-13	[-1]	Group31	40	4	[HRAS, KRAS, NRAS, YWHAB]
R-HSA:8936676	Moderate kinase activity BRAF mutants:RAS:GTP homo/heterodimerize	REACTOME_Reactions_25.05.2022	1.04809e-07	2.75648e-05	1.37512e-14	3.02525e-13	[-1]	Group31	40	4	[HRAS, KRAS, NRAS, YWHAB]
R-HSA:8936731	Inactive BRAF mutants:mutant RAS:GTP bind RAF1	REACTOME_Reactions_25.05.2022	1.04809e-07	2.75648e-05	1.37512e-14	3.02525e-13	[-1]	Group31	40	4	[HRAS, KRAS, NRAS, YWHAB]
R-HSA:8941613	Activated FGFR4:p-FRS:p-PTPN11 activates RAS nucleotide exchange	REACTOME_Reactions_25.05.2022	2.33012e-06	0.000421752	1.37512e-14	3.02525e-13	[-1]	Group31	20	4	[FGFR4, HRAS, KRAS, NRAS]
R-HSA:8941618	Activated FGFR2:p-FRS:p-PTPN11 activates RAS nucleotide exchange	REACTOME_Reactions_25.05.2022	4.21161e-06	0.000711763	1.37512e-14	3.02525e-13	[-1]	Group31	17.3913	4	[FGFR2, HRAS, KRAS, NRAS]
R-HSA:8941623	Activated FGFR1:p-FRS:p-PTPN11 activates RAS nucleotide exchange	REACTOME_Reactions_25.05.2022	2.86774e-06	0.000507591	1.37512e-14	3.02525e-13	[-1]	Group31	19.0476	4	[FGFR1, HRAS, KRAS, NRAS]
R-HSA:8941628	Activated FGFR3:p-FRS:p-PTPN11 activates RAS nucleotide exchange	REACTOME_Reactions_25.05.2022	1.4826e-06	0.000286141	1.37512e-14	3.02525e-13	[-1]	Group31	22.2222	4	[FGFR3, HRAS, KRAS, NRAS]
R-HSA:9653108	Raf dimer inhibitors bind RAF heterodimers	REACTOME_Reactions_25.05.2022	6.3119e-08	1.71053e-05	1.37512e-14	3.02525e-13	[-1]	Group31	44.4444	4	[HRAS, KRAS, NRAS, YWHAB]
R-HSA:9656209	Dissociation of RAS:RAF1 mutant complex	REACTOME_Reactions_25.05.2022	2.3822e-05	0.00281099	1.37512e-14	3.02525e-13	[-1]	Group31	11.4286	4	[HRAS, KRAS, NRAS, YWHAB]
R-HSA:9656211	MAP2Ks and MAPKs bind to the activated mutant RAF1 complex	REACTOME_Reactions_25.05.2022	2.3822e-05	0.00281099	1.37512e-14	3.02525e-13	[-1]	Group31	11.4286	4	[HRAS, KRAS, NRAS, YWHAB]
R-HSA:9656212	Phosphorylation of RAF1 mutants	REACTOME_Reactions_25.05.2022	1.87101e-06	0.00034988	1.37512e-14	3.02525e-13	[-1]	Group31	21.0526	4	[HRAS, KRAS, NRAS, YWHAB]
R-HSA:9656213	RAF1 mutants show enhanced heterodimerization with BRAF	REACTOME_Reactions_25.05.2022	3.51964e-08	9.8198e-06	1.37512e-14	3.02525e-13	[-1]	Group31	50	4	[HRAS, KRAS, NRAS, YWHAB]
R-HSA:9656214	MAP2Ks phosphorylate MAPKs downstream of RAF1 mutants	REACTOME_Reactions_25.05.2022	2.3822e-05	0.00281099	1.37512e-14	3.02525e-13	[-1]	Group31	11.4286	4	[HRAS, KRAS, NRAS, YWHAB]
R-HSA:9656215	RAF1 mutant complexes phosphorylate MAP2K dimer	REACTOME_Reactions_25.05.2022	2.3822e-05	0.00281099	1.37512e-14	3.02525e-13	[-1]	Group31	11.4286	4	[HRAS, KRAS, NRAS, YWHAB]
R-HSA:9657599	Dual mechanism MAP2K inhibitors bind MAP2Ks	REACTOME_Reactions_25.05.2022	2.3822e-05	0.00281099	1.37512e-14	3.02525e-13	[-1]	Group31	11.4286	4	[HRAS, KRAS, NRAS, YWHAB]
R-HSA:9657603	Dual mechanism MAPK inhibitors bind MAPKs	REACTOME_Reactions_25.05.2022	2.3822e-05	0.00281099	1.37512e-14	3.02525e-13	[-1]	Group31	11.4286	4	[HRAS, KRAS, NRAS, YWHAB]
R-HSA:9657606	Single mechanism MAP2K inhibitors bind phosphorylated MAP2Ks	REACTOME_Reactions_25.05.2022	2.3822e-05	0.00281099	1.37512e-14	3.02525e-13	[-1]	Group31	11.4286	4	[HRAS, KRAS, NRAS, YWHAB]
R-HSA:9657608	Single mechanism MAPK inhibitors bind phosphorylated MAPK	REACTOME_Reactions_25.05.2022	2.3822e-05	0.00281099	1.37512e-14	3.02525e-13	[-1]	Group31	11.4286	4	[HRAS, KRAS, NRAS, YWHAB]
R-HSA:109699	PI3K-containing complexes phosphorylate PIP2 to PIP3	REACTOME_Reactions_25.05.2022	3.68721e-05	0.00394531	1.35092e-15	3.2422e-14	[-1]	Group32	10.2564	4	[FGFR1, FGFR2, FGFR3, FGFR4]
R-HSA:1433418	Phosphorylation of JAK2	REACTOME_Reactions_25.05.2022	3.51964e-08	9.8198e-06	1.35092e-15	3.2422e-14	[-1]	Group32	50	4	[FYN, LCK, LYN, YES1]
R-HSA:1433428	GRB2 is indirectly recruited to p-KIT through SHP2	REACTOME_Reactions_25.05.2022	6.3119e-08	1.71053e-05	1.35092e-15	3.2422e-14	[-1]	Group32	44.4444	4	[FYN, LCK, LYN, YES1]
R-HSA:1433451	JAK2 binds to p-KIT	REACTOME_Reactions_25.05.2022	3.51964e-08	9.8198e-06	1.35092e-15	3.2422e-14	[-1]	Group32	50	4	[FYN, LCK, LYN, YES1]
R-HSA:1433454	Phosphorylation of GAB2 by SFKs	REACTOME_Reactions_25.05.2022	1.04809e-07	2.75648e-05	1.35092e-15	3.2422e-14	[-1]	Group32	40	4	[FYN, LCK, LYN, YES1]
R-HSA:1433456	Recruitment of STATs	REACTOME_Reactions_25.05.2022	2.45225e-07	5.98348e-05	1.35092e-15	3.2422e-14	[-1]	Group32	33.3333	4	[FYN, LCK, LYN, YES1]
R-HSA:1433488	Phosphorylation of SHP2 by SFKs	REACTOME_Reactions_25.05.2022	3.51964e-08	9.8198e-06	1.35092e-15	3.2422e-14	[-1]	Group32	50	4	[FYN, LCK, LYN, YES1]
R-HSA:1433506	Phosphorylation of APS	REACTOME_Reactions_25.05.2022	3.51964e-08	9.8198e-06	1.35092e-15	3.2422e-14	[-1]	Group32	50	4	[FYN, LCK, LYN, YES1]
R-HSA:1433514	Synthesis of PIP3 from PIP2 by PI3K	REACTOME_Reactions_25.05.2022	4.92236e-07	0.000111738	1.35092e-15	3.2422e-14	[-1]	Group32	28.5714	4	[FYN, LCK, LYN, YES1]
R-HSA:1433542	Phosphorylation and activation of VAV1	REACTOME_Reactions_25.05.2022	3.51964e-08	9.8198e-06	1.35092e-15	3.2422e-14	[-1]	Group32	50	4	[FYN, LCK, LYN, YES1]
R-HSA:1470009	Phosphorylation of STATs	REACTOME_Reactions_25.05.2022	2.45225e-07	5.98348e-05	1.35092e-15	3.2422e-14	[-1]	Group32	33.3333	4	[FYN, LCK, LYN, YES1]
R-HSA:1470010	Dimerization of STATs	REACTOME_Reactions_25.05.2022	2.45225e-07	5.98348e-05	1.35092e-15	3.2422e-14	[-1]	Group32	33.3333	4	[FYN, LCK, LYN, YES1]
R-HSA:1470012	Disassociation and translocation of STATs to the nucleus	REACTOME_Reactions_25.05.2022	2.45225e-07	5.98348e-05	1.35092e-15	3.2422e-14	[-1]	Group32	33.3333	4	[FYN, LCK, LYN, YES1]
R-HSA:1472121	Phosphorylation of p-KIT on Y900 by Src kinases	REACTOME_Reactions_25.05.2022	1.76636e-08	5.10478e-06	1.35092e-15	3.2422e-14	[-1]	Group32	57.1429	4	[FYN, LCK, LYN, YES1]
R-HSA:1562641	Indirect recruitment of PI3K to KIT via p(Y)-GAB2	REACTOME_Reactions_25.05.2022	4.92236e-07	0.000111738	1.35092e-15	3.2422e-14	[-1]	Group32	28.5714	4	[FYN, LCK, LYN, YES1]
R-HSA:174104	Ubiquitination of Cyclin A by APC/C:Cdc20 complex	REACTOME_Reactions_25.05.2022	0.000327313	0.0183295	1.35092e-15	3.2422e-14	[-1]	Group32	10.7143	3	[CDK1, RPS27A, UBA52]
R-HSA:174157	Degradation of multiubiquitinated Cyclin B	REACTOME_Reactions_25.05.2022	0.000205074	0.0141501	1.35092e-15	3.2422e-14	[-1]	Group32	12.5	3	[CDK1, RPS27A, UBA52]
R-HSA:174227	Ubiquitination of Cyclin B by phospho-APC/C:Cdc20 complex	REACTOME_Reactions_25.05.2022	0.000205074	0.0141501	1.35092e-15	3.2422e-14	[-1]	Group32	12.5	3	[CDK1, RPS27A, UBA52]
R-HSA:174255	Degradation multiubiquitinated Cyclin A	REACTOME_Reactions_25.05.2022	0.00531287	0.0106257	1.35092e-15	3.2422e-14	[-1]	Group32	4.10959	3	[CDK1, RPS27A, UBA52]
R-HSA:183084	CBL escapes CDC42-mediated inhibition by down-regulating the adaptor molecule Beta-Pix	REACTOME_Reactions_25.05.2022	5.83527e-05	0.00554351	1.35092e-15	3.2422e-14	[-1]	Group32	18.75	3	[CDC42, RPS27A, UBA52]
R-HSA:187574	Degradation of ubiquitinated p27/p21 by the 26S proteasome	REACTOME_Reactions_25.05.2022	0.00264219	0.0369907	1.35092e-15	3.2422e-14	[-1]	Group32	5.26316	3	[CDK2, RPS27A, UBA52]
R-HSA:187575	Ubiquitination of phospho-p27/p21	REACTOME_Reactions_25.05.2022	4.75782e-05	0.00475782	1.35092e-15	3.2422e-14	[-1]	Group32	20	3	[CDK2, RPS27A, UBA52]
R-HSA:2029459	Sequestering and phosphorylation Fc gamma receptors in the lipid rafts	REACTOME_Reactions_25.05.2022	1.06672e-09	3.52017e-07	1.35092e-15	3.2422e-14	[-1]	Group32	45.4545	5	[FGR, FYN, HCK, LYN, YES1]
R-HSA:205205	Interaction of Src family kinases with p-KIT	REACTOME_Reactions_25.05.2022	1.76636e-08	5.10478e-06	1.35092e-15	3.2422e-14	[-1]	Group32	57.1429	4	[FYN, LCK, LYN, YES1]
R-HSA:205234	Indirect recruitment of GAB2 to p-KIT	REACTOME_Reactions_25.05.2022	1.04809e-07	2.75648e-05	1.35092e-15	3.2422e-14	[-1]	Group32	40	4	[FYN, LCK, LYN, YES1]
R-HSA:205238	SHP2 interacts with p-KIT	REACTOME_Reactions_25.05.2022	3.51964e-08	9.8198e-06	1.35092e-15	3.2422e-14	[-1]	Group32	50	4	[FYN, LCK, LYN, YES1]
R-HSA:205244	Recruitment of CBL to KIT	REACTOME_Reactions_25.05.2022	1.6409e-07	4.1843e-05	1.35092e-15	3.2422e-14	[-1]	Group32	36.3636	4	[FYN, LCK, LYN, YES1]
R-HSA:205319	Interaction of APS and p-KIT	REACTOME_Reactions_25.05.2022	3.51964e-08	9.8198e-06	1.35092e-15	3.2422e-14	[-1]	Group32	50	4	[FYN, LCK, LYN, YES1]
R-HSA:210291	Phosphorylation of PECAM-1 by Fyn or Lyn or c-Src	REACTOME_Reactions_25.05.2022	7.59825e-09	2.29467e-06	1.35092e-15	3.2422e-14	[-1]	Group32	66.6667	4	[FYN, LCK, LYN, YES1]
R-HSA:2130282	Degradation of ubiquitinated beta catenin by the proteasome	REACTOME_Reactions_25.05.2022	0.00435585	0.0261351	1.35092e-15	3.2422e-14	[-1]	Group32	4.41176	3	[PPP2CA, RPS27A, UBA52]
R-HSA:2130286	Multi-ubiquitination of phospho-beta-catenin by RBX1:SCF(beta-TrCP1)	REACTOME_Reactions_25.05.2022	0.000180069	0.012965	1.35092e-15	3.2422e-14	[-1]	Group32	13.0435	3	[PPP2CA, RPS27A, UBA52]
R-HSA:2160931	Disassembly of tight junctions	REACTOME_Reactions_25.05.2022	4.75782e-05	0.00475782	1.35092e-15	3.2422e-14	[-1]	Group32	20	3	[RHOA, RPS27A, UBA52]
R-HSA:2160935	SMURF1 ubiquitinates RHOA	REACTOME_Reactions_25.05.2022	4.75782e-05	0.00475782	1.35092e-15	3.2422e-14	[-1]	Group32	20	3	[RHOA, RPS27A, UBA52]
R-HSA:2316434	PI3K phosphorylates PIP2 to PIP3	REACTOME_Reactions_25.05.2022	1.7813e-07	4.48887e-05	1.35092e-15	3.2422e-14	[-1]	Group32	8.23529	7	[FGFR1, FGFR2, FGFR3, FGFR4, FYN, LCK, RAC1]
R-HSA:2400009	PI3K inhibitors block PI3K catalytic activity	REACTOME_Reactions_25.05.2022	9.79978e-08	2.58714e-05	1.35092e-15	3.2422e-14	[-1]	Group32	8.97436	7	[FGFR1, FGFR2, FGFR3, FGFR4, FYN, LCK, RAC1]
R-HSA:388829	SHP2 phosphatase binds CTLA-4	REACTOME_Reactions_25.05.2022	6.3119e-08	1.71053e-05	1.35092e-15	3.2422e-14	[-1]	Group32	44.4444	4	[FYN, LCK, LYN, YES1]
R-HSA:388831	Phosphorylation of CD28	REACTOME_Reactions_25.05.2022	3.51964e-08	9.8198e-06	1.35092e-15	3.2422e-14	[-1]	Group32	50	4	[FYN, LCK, LYN, YES1]
R-HSA:388833	Phosphorylation of CTLA-4	REACTOME_Reactions_25.05.2022	1.39637e-08	4.11928e-06	1.35092e-15	3.2422e-14	[-1]	Group32	29.4118	5	[FYN, LCK, LYN, PPP2CA, YES1]
R-HSA:389348	Activation of Rac1 by pVav1	REACTOME_Reactions_25.05.2022	6.00143e-06	0.00092422	1.35092e-15	3.2422e-14	[-1]	Group32	37.5	3	[FYN, LCK, RAC1]
R-HSA:389350	Activation of Cdc42 by pVav1	REACTOME_Reactions_25.05.2022	6.00143e-06	0.00092422	1.35092e-15	3.2422e-14	[-1]	Group32	37.5	3	[CDC42, FYN, LCK]
R-HSA:3928583	FYN phosphorylates NMDAR2B	REACTOME_Reactions_25.05.2022	3.81963e-05	0.00401061	1.35092e-15	3.2422e-14	[-1]	Group32	21.4286	3	[FYN, LYN, YES1]
R-HSA:3928584	p-EPHs bind SRC,FYN,YES,LYN	REACTOME_Reactions_25.05.2022	0.000261597	0.0164806	1.35092e-15	3.2422e-14	[-1]	Group32	11.5385	3	[FYN, LYN, YES1]
R-HSA:3928602	NGEF binds EPHA	REACTOME_Reactions_25.05.2022	9.99147e-05	0.00819301	1.35092e-15	3.2422e-14	[-1]	Group32	15.7895	3	[FYN, LYN, YES1]
R-HSA:3928604	SFKs phosphorylate VAV2,3	REACTOME_Reactions_25.05.2022	0.000327313	0.0183295	1.35092e-15	3.2422e-14	[-1]	Group32	10.7143	3	[FYN, LYN, YES1]
R-HSA:3928607	p-EPHs bind VAV2,3	REACTOME_Reactions_25.05.2022	0.000327313	0.0183295	1.35092e-15	3.2422e-14	[-1]	Group32	10.7143	3	[FYN, LYN, YES1]
R-HSA:3928623	EPHBs bind NMDARs	REACTOME_Reactions_25.05.2022	3.81963e-05	0.00401061	1.35092e-15	3.2422e-14	[-1]	Group32	21.4286	3	[FYN, LYN, YES1]
R-HSA:3928627	EPHB phosphorylates TIAM1	REACTOME_Reactions_25.05.2022	4.75782e-05	0.00475782	1.35092e-15	3.2422e-14	[-1]	Group32	20	3	[FYN, LYN, YES1]
R-HSA:3928628	VAV exchanges GTP for GDP on RAC1, activating it	REACTOME_Reactions_25.05.2022	1.10483e-05	0.00152467	1.35092e-15	3.2422e-14	[-1]	Group32	13.7931	4	[FYN, LYN, RAC1, YES1]
R-HSA:3928642	TIAM1 exchanges GTP for GDP on RAC1, activating it	REACTOME_Reactions_25.05.2022	2.33012e-06	0.000421752	1.35092e-15	3.2422e-14	[-1]	Group32	20	4	[FYN, LYN, RAC1, YES1]
R-HSA:3928645	EPHB:NMDAR binds TIAM1	REACTOME_Reactions_25.05.2022	4.75782e-05	0.00475782	1.35092e-15	3.2422e-14	[-1]	Group32	20	3	[FYN, LYN, YES1]
R-HSA:3928648	SFKs phosphorylate NGEF	REACTOME_Reactions_25.05.2022	9.99147e-05	0.00819301	1.35092e-15	3.2422e-14	[-1]	Group32	15.7895	3	[FYN, LYN, YES1]
R-HSA:3928651	NGEF exchanges GTP for GDP on RHOA	REACTOME_Reactions_25.05.2022	2.33012e-06	0.000421752	1.35092e-15	3.2422e-14	[-1]	Group32	20	4	[FYN, LYN, RHOA, YES1]
R-HSA:4093327	EPHA binds TIAM1	REACTOME_Reactions_25.05.2022	9.99147e-05	0.00819301	1.35092e-15	3.2422e-14	[-1]	Group32	15.7895	3	[FYN, LYN, YES1]
R-HSA:4093336	p-TIAM1 exchanges GTP for GDP on RAC1, activating it	REACTOME_Reactions_25.05.2022	8.88365e-07	0.000185668	1.35092e-15	3.2422e-14	[-1]	Group32	25	4	[FYN, LYN, RAC1, YES1]
R-HSA:442273	VAV1 is a GEF for Rho/Rac family GTPases	REACTOME_Reactions_25.05.2022	6.00143e-06	0.00092422	1.35092e-15	3.2422e-14	[-1]	Group32	37.5	3	[CDC42, RAC1, RHOA]
R-HSA:442291	VAV2 is a GEF for Rho/Rac family kinases	REACTOME_Reactions_25.05.2022	2.15848e-06	0.000395002	1.35092e-15	3.2422e-14	[-1]	Group32	50	3	[CDC42, RAC1, RHOA]
R-HSA:5624486	SFKs phosphorylates RAF1 on Y340,Y341	REACTOME_Reactions_25.05.2022	1.41208e-11	5.11174e-09	1.35092e-15	3.2422e-14	[-1]	Group32	83.3333	5	[FYN, HRAS, KRAS, LYN, NRAS]
R-HSA:5625959	Activated RHOA, RHOG, RAC1 and CDC42 bind KTN1 (kinectin)	REACTOME_Reactions_25.05.2022	1.08304e-06	0.00022094	1.35092e-15	3.2422e-14	[-1]	Group32	60	3	[CDC42, RAC1, RHOA]
R-HSA:5654672	CBL ubiquitinates FRS2 and FGFR1	REACTOME_Reactions_25.05.2022	0.000180069	0.012965	1.35092e-15	3.2422e-14	[-1]	Group32	13.0435	3	[FGFR1, RPS27A, UBA52]
R-HSA:5654677	CBL ubiquitinates FRS2 and FGFR2	REACTOME_Reactions_25.05.2022	0.000232224	0.0153268	1.35092e-15	3.2422e-14	[-1]	Group32	12	3	[FGFR2, RPS27A, UBA52]
R-HSA:5654679	CBL ubiquitinates FRS2 and FGFR3	REACTOME_Reactions_25.05.2022	0.000117136	0.00901944	1.35092e-15	3.2422e-14	[-1]	Group32	15	3	[FGFR3, RPS27A, UBA52]
R-HSA:5654684	CBL ubiquitinates FRS2 and FGFR4	REACTOME_Reactions_25.05.2022	0.000157131	0.0114706	1.35092e-15	3.2422e-14	[-1]	Group32	13.6364	3	[FGFR4, RPS27A, UBA52]
R-HSA:5672083	KTN1 binds Kinesin-1	REACTOME_Reactions_25.05.2022	1.74975e-05	0.00220468	1.35092e-15	3.2422e-14	[-1]	Group32	27.2727	3	[CDC42, RAC1, RHOA]
R-HSA:5672329	IQGAP1 binds CLIP1 and microtubules	REACTOME_Reactions_25.05.2022	4.52226e-08	1.2391e-05	1.35092e-15	3.2422e-14	[-1]	Group32	23.8095	5	[CDC42, RAC1, TUBA3C, TUBA3D, TUBA3E]
R-HSA:5672965	RAS GEFs promote RAS nucleotide exchange	REACTOME_Reactions_25.05.2022	7.06213e-09	2.14689e-06	1.35092e-15	3.2422e-14	[-1]	Group32	7.43802	9	[FGFR1, FGFR2, FGFR3, FGFR4, FYN, HRAS, KRAS, NRAS, TEK]
R-HSA:879917	CBL, GRB2, FYN and PI3K p85 subunit are constitutively associated	REACTOME_Reactions_25.05.2022	3.52903e-07	8.29321e-05	1.35092e-15	3.2422e-14	[-1]	Group32	30.7692	4	[FYN, HCK, LYN, YES1]
R-HSA:912627	CBL ubiquitinates PI3K	REACTOME_Reactions_25.05.2022	1.28297e-10	4.51607e-08	1.35092e-15	3.2422e-14	[-1]	Group32	35.2941	6	[FYN, HCK, LYN, RPS27A, UBA52, YES1]
R-HSA:912629	CBL is tyrosine phosphorylated	REACTOME_Reactions_25.05.2022	3.52903e-07	8.29321e-05	1.35092e-15	3.2422e-14	[-1]	Group32	30.7692	4	[FYN, HCK, LYN, YES1]
R-HSA:9664261	Src phosphorylate SYK in IgG:Leishmania surface:p-FCGR3A:SYK	REACTOME_Reactions_25.05.2022	5.84074e-10	1.98585e-07	1.35092e-15	3.2422e-14	[-1]	Group32	50	5	[FGR, FYN, HCK, LYN, YES1]
R-HSA:9664275	Src phosphorylates CD3 dimers in IgG:Lma antigens:FCGR3A:CD3 dimers	REACTOME_Reactions_25.05.2022	2.93156e-10	1.01432e-07	1.35092e-15	3.2422e-14	[-1]	Group32	55.5556	5	[FGR, FYN, HCK, LYN, YES1]
R-HSA:9670412	Phosphorylation of STATs downstream of KIT mutants	REACTOME_Reactions_25.05.2022	1.6409e-07	4.1843e-05	1.35092e-15	3.2422e-14	[-1]	Group32	36.3636	4	[FYN, LCK, LYN, YES1]
R-HSA:9670413	JAK2 binds to p-KIT mutants	REACTOME_Reactions_25.05.2022	1.76636e-08	5.10478e-06	1.35092e-15	3.2422e-14	[-1]	Group32	57.1429	4	[FYN, LCK, LYN, YES1]
R-HSA:9670414	KIT mutants bind SFKs	REACTOME_Reactions_25.05.2022	7.59825e-09	2.29467e-06	1.35092e-15	3.2422e-14	[-1]	Group32	66.6667	4	[FYN, LCK, LYN, YES1]
R-HSA:9670416	Recruitment of STATs by KIT mutants	REACTOME_Reactions_25.05.2022	1.6409e-07	4.1843e-05	1.35092e-15	3.2422e-14	[-1]	Group32	36.3636	4	[FYN, LCK, LYN, YES1]
R-HSA:9670417	Dimerization of STATs downstream of KIT mutants	REACTOME_Reactions_25.05.2022	1.6409e-07	4.1843e-05	1.35092e-15	3.2422e-14	[-1]	Group32	36.3636	4	[FYN, LCK, LYN, YES1]
R-HSA:9670418	Phosphorylation of JAK2 downstream of KIT mutants	REACTOME_Reactions_25.05.2022	1.76636e-08	5.10478e-06	1.35092e-15	3.2422e-14	[-1]	Group32	57.1429	4	[FYN, LCK, LYN, YES1]
R-HSA:9670426	Disassociation and translocation of STATs to the nucleus downstream of KIT mutants	REACTOME_Reactions_25.05.2022	1.6409e-07	4.1843e-05	1.35092e-15	3.2422e-14	[-1]	Group32	36.3636	4	[FYN, LCK, LYN, YES1]
R-HSA:9674816	p-Y546,Y584-PTPN11 (in CSF3 dimer:2xp-4Y-CSF3R:LYN:p-Y-JAK1:p-JAK2:p-SYK:p-HCK:p-TYK2:SHC:GRB2:PTPN11) dephosphorylates KRAS	REACTOME_Reactions_25.05.2022	3.01168e-05	0.00334297	1.35092e-15	3.2422e-14	[-1]	Group32	23.0769	3	[HCK, KRAS, LYN]
R-HSA:9705738	SOCS1,3 ubiquitinates CSF3R in SOCS1,3:p-4Y-CSF3R:CSF3 dimer:LYN:p-Y-JAK1:p-JAK2:p-SYK:p-HCK:p-TYK2:CUL5:ELOB:ELOC:RNF7	REACTOME_Reactions_25.05.2022	2.86774e-06	0.000507591	1.35092e-15	3.2422e-14	[-1]	Group32	19.0476	4	[HCK, LYN, RPS27A, UBA52]
R-HSA:983709	LYN, FYN, BLK phosphorylate ITAMs of Ig-alpha (CD79A) and Ig-beta (CD79B)	REACTOME_Reactions_25.05.2022	3.76409e-06	0.000639895	1.35092e-15	3.2422e-14	[-1]	Group32	42.8571	3	[BLK, FYN, LYN]
R-HSA:139899	Sequestration of BAD protein by 14-3-3	REACTOME_Reactions_25.05.2022	1.3079e-10	4.59074e-08	1.06329e-23	3.61518e-22	[-1]	Group33	62.5	5	[SFN, YWHAB, YWHAG, YWHAH, YWHAZ]
R-HSA:139906	Activation of BAD by calcineurin	REACTOME_Reactions_25.05.2022	5.84074e-10	1.98585e-07	1.06329e-23	3.61518e-22	[-1]	Group33	50	5	[SFN, YWHAB, YWHAG, YWHAH, YWHAZ]
R-HSA:1445149	14-3-3 binds p-5S,T642-AS160 (TBC1D4)	REACTOME_Reactions_25.05.2022	2.93156e-10	1.01432e-07	1.06329e-23	3.61518e-22	[-1]	Group33	55.5556	5	[SFN, YWHAB, YWHAG, YWHAH, YWHAZ]
R-HSA:1454689	14-3-3 Binds p-S237-TBC1D1	REACTOME_Reactions_25.05.2022	1.3079e-10	4.59074e-08	1.06329e-23	3.61518e-22	[-1]	Group33	62.5	5	[SFN, YWHAB, YWHAG, YWHAH, YWHAZ]
R-HSA:174104	Ubiquitination of Cyclin A by APC/C:Cdc20 complex	REACTOME_Reactions_25.05.2022	0.000327313	0.0183295	1.06329e-23	3.61518e-22	[-1]	Group33	10.7143	3	[CDK1, RPS27A, UBA52]
R-HSA:174157	Degradation of multiubiquitinated Cyclin B	REACTOME_Reactions_25.05.2022	0.000205074	0.0141501	1.06329e-23	3.61518e-22	[-1]	Group33	12.5	3	[CDK1, RPS27A, UBA52]
R-HSA:174227	Ubiquitination of Cyclin B by phospho-APC/C:Cdc20 complex	REACTOME_Reactions_25.05.2022	0.000205074	0.0141501	1.06329e-23	3.61518e-22	[-1]	Group33	12.5	3	[CDK1, RPS27A, UBA52]
R-HSA:174255	Degradation multiubiquitinated Cyclin A	REACTOME_Reactions_25.05.2022	0.00531287	0.0106257	1.06329e-23	3.61518e-22	[-1]	Group33	4.10959	3	[CDK1, RPS27A, UBA52]
R-HSA:176700	Incorporation Of Extended And Processed Telomere End Into Higher Order T-Loop And Associated Protein Structure	REACTOME_Reactions_25.05.2022	5.13146e-06	0.000836427	1.06329e-23	3.61518e-22	[-1]	Group33	9.61539	5	[H2AC6, H2AC7, H2AJ, H2AX, H3-4]
R-HSA:181450	Incorporation Of Extended And Processed Telomere End Into Associated Protein Structure	REACTOME_Reactions_25.05.2022	5.13146e-06	0.000836427	1.06329e-23	3.61518e-22	[-1]	Group33	9.61539	5	[H2AC6, H2AC7, H2AJ, H2AX, H3-4]
R-HSA:183084	CBL escapes CDC42-mediated inhibition by down-regulating the adaptor molecule Beta-Pix	REACTOME_Reactions_25.05.2022	5.83527e-05	0.00554351	1.06329e-23	3.61518e-22	[-1]	Group33	18.75	3	[CDC42, RPS27A, UBA52]
R-HSA:187574	Degradation of ubiquitinated p27/p21 by the 26S proteasome	REACTOME_Reactions_25.05.2022	0.00264219	0.0369907	1.06329e-23	3.61518e-22	[-1]	Group33	5.26316	3	[CDK2, RPS27A, UBA52]
R-HSA:187575	Ubiquitination of phospho-p27/p21	REACTOME_Reactions_25.05.2022	4.75782e-05	0.00475782	1.06329e-23	3.61518e-22	[-1]	Group33	20	3	[CDK2, RPS27A, UBA52]
R-HSA:190520	Association of Golgi transport vesicles with microtubules	REACTOME_Reactions_25.05.2022	8.44341e-05	0.0071769	1.06329e-23	3.61518e-22	[-1]	Group33	16.6667	3	[TUBA3C, TUBA3D, TUBA3E]
R-HSA:190877	Insertion of connexons into the plasma membrane resulting in the formation of hemi-channels	REACTOME_Reactions_25.05.2022	8.44341e-05	0.0071769	1.06329e-23	3.61518e-22	[-1]	Group33	16.6667	3	[TUBA3C, TUBA3D, TUBA3E]
R-HSA:191737	Docking of connexons into junctional, double-membrane spanning channels	REACTOME_Reactions_25.05.2022	8.44341e-05	0.0071769	1.06329e-23	3.61518e-22	[-1]	Group33	16.6667	3	[TUBA3C, TUBA3D, TUBA3E]
R-HSA:2029459	Sequestering and phosphorylation Fc gamma receptors in the lipid rafts	REACTOME_Reactions_25.05.2022	1.06672e-09	3.52017e-07	1.06329e-23	3.61518e-22	[-1]	Group33	45.4545	5	[FGR, FYN, HCK, LYN, YES1]
R-HSA:2130282	Degradation of ubiquitinated beta catenin by the proteasome	REACTOME_Reactions_25.05.2022	0.00435585	0.0261351	1.06329e-23	3.61518e-22	[-1]	Group33	4.41176	3	[PPP2CA, RPS27A, UBA52]
R-HSA:2130286	Multi-ubiquitination of phospho-beta-catenin by RBX1:SCF(beta-TrCP1)	REACTOME_Reactions_25.05.2022	0.000180069	0.012965	1.06329e-23	3.61518e-22	[-1]	Group33	13.0435	3	[PPP2CA, RPS27A, UBA52]
R-HSA:2160931	Disassembly of tight junctions	REACTOME_Reactions_25.05.2022	4.75782e-05	0.00475782	1.06329e-23	3.61518e-22	[-1]	Group33	20	3	[RHOA, RPS27A, UBA52]
R-HSA:2160935	SMURF1 ubiquitinates RHOA	REACTOME_Reactions_25.05.2022	4.75782e-05	0.00475782	1.06329e-23	3.61518e-22	[-1]	Group33	20	3	[RHOA, RPS27A, UBA52]
R-HSA:2316347	RAB4A:GTP binds KIF3 and activates KIF3	REACTOME_Reactions_25.05.2022	0.00013618	0.0102135	1.06329e-23	3.61518e-22	[-1]	Group33	14.2857	3	[TUBA3C, TUBA3D, TUBA3E]
R-HSA:2468287	CDK1 phosphorylates CDCA5 (Sororin) at centromeres	REACTOME_Reactions_25.05.2022	0.00035086	0.0192973	1.06329e-23	3.61518e-22	[-1]	Group33	4	5	[CDK1, PPP2CA, TUBA3C, TUBA3D, TUBA3E]
R-HSA:3451147	KAT5 HAT complex acetylates TCF4 gene at histone H4	REACTOME_Reactions_25.05.2022	6.19673e-06	0.000941903	1.06329e-23	3.61518e-22	[-1]	Group33	9.25926	5	[H2AC6, H2AC7, H2AJ, H2AX, H3-4]
R-HSA:3785711	Telomere shortening during replicative exhaustion	REACTOME_Reactions_25.05.2022	5.13146e-06	0.000836427	1.06329e-23	3.61518e-22	[-1]	Group33	9.61539	5	[H2AC6, H2AC7, H2AJ, H2AX, H3-4]
R-HSA:380316	Association of NuMA with microtubules	REACTOME_Reactions_25.05.2022	9.23691e-05	0.00766663	1.06329e-23	3.61518e-22	[-1]	Group33	5.31915	5	[CDK1, TUBA3C, TUBA3D, TUBA3E, YWHAG]
R-HSA:389954	Hydrolysis of ATP and release of tubulin folding intermediate from CCT/TriC	REACTOME_Reactions_25.05.2022	0.000232224	0.0153268	1.06329e-23	3.61518e-22	[-1]	Group33	12	3	[TUBA3C, TUBA3D, TUBA3E]
R-HSA:389961	ADP is exchanged for ATP in the (ADP:CCT/TriC):tubulin complex	REACTOME_Reactions_25.05.2022	0.000232224	0.0153268	1.06329e-23	3.61518e-22	[-1]	Group33	12	3	[TUBA3C, TUBA3D, TUBA3E]
R-HSA:389963	alpha-tubulin:GTP:Cofactor B +Cofactor E -> alpha-tubulin:GTP: Cofactor E +Cofactor B	REACTOME_Reactions_25.05.2022	1.74975e-05	0.00220468	1.06329e-23	3.61518e-22	[-1]	Group33	27.2727	3	[TUBA3C, TUBA3D, TUBA3E]
R-HSA:389964	Beta-tubulin:GTP:Cofactor D:alpha-tubulin:GTP:Cofactor E+ Cofactor C-> Beta-tubulin:GTP:Cofactor D:alpha-tubulin:GTP:Cofactor E:Cofactor C	REACTOME_Reactions_25.05.2022	9.99147e-05	0.00819301	1.06329e-23	3.61518e-22	[-1]	Group33	15.7895	3	[TUBA3C, TUBA3D, TUBA3E]
R-HSA:389972	alpha-tubulin:GTP + Cofactor B -> alpha-tubulin:GTP: Cofactor B	REACTOME_Reactions_25.05.2022	1.27702e-05	0.00169844	1.06329e-23	3.61518e-22	[-1]	Group33	30	3	[TUBA3C, TUBA3D, TUBA3E]
R-HSA:389974	Beta-tubulin:GTP:Cofactor D:alpha-tubulin:GTP:Cofactor E:Cofactor C-> Beta-tubulin:GDP :alpha-tubulin:GTP heterodimer +Cofactor E+ Cofactor D+ Cofactor C+ Pi	REACTOME_Reactions_25.05.2022	9.99147e-05	0.00819301	1.06329e-23	3.61518e-22	[-1]	Group33	15.7895	3	[TUBA3C, TUBA3D, TUBA3E]
R-HSA:389976	Beta-tubulin:GTP:Cofactor D+alpha-tubulin:GTP:Cofactor E-> Beta-tubulin:GTP:Cofactor D:alpha-tubulin:GTP:Cofactor E	REACTOME_Reactions_25.05.2022	8.44341e-05	0.0071769	1.06329e-23	3.61518e-22	[-1]	Group33	16.6667	3	[TUBA3C, TUBA3D, TUBA3E]
R-HSA:389978	alpha-tubulin:GTP + Cofactor E -> alpha-tubulin:GTP:Cofactor E	REACTOME_Reactions_25.05.2022	1.27702e-05	0.00169844	1.06329e-23	3.61518e-22	[-1]	Group33	30	3	[TUBA3C, TUBA3D, TUBA3E]
R-HSA:442273	VAV1 is a GEF for Rho/Rac family GTPases	REACTOME_Reactions_25.05.2022	6.00143e-06	0.00092422	1.06329e-23	3.61518e-22	[-1]	Group33	37.5	3	[CDC42, RAC1, RHOA]
R-HSA:442291	VAV2 is a GEF for Rho/Rac family kinases	REACTOME_Reactions_25.05.2022	2.15848e-06	0.000395002	1.06329e-23	3.61518e-22	[-1]	Group33	50	3	[CDC42, RAC1, RHOA]
R-HSA:445071	Reinsertion of L1 into the plasma membrane	REACTOME_Reactions_25.05.2022	0.000327313	0.0183295	1.06329e-23	3.61518e-22	[-1]	Group33	10.7143	3	[TUBA3C, TUBA3D, TUBA3E]
R-HSA:445077	Transport of L1 from C-domain to P-domain	REACTOME_Reactions_25.05.2022	0.000327313	0.0183295	1.06329e-23	3.61518e-22	[-1]	Group33	10.7143	3	[TUBA3C, TUBA3D, TUBA3E]
R-HSA:5618080	HSP90:ATP:p23:FKBP52:SHR:SH translocates to the nucleus	REACTOME_Reactions_25.05.2022	0.00125132	0.0337857	1.06329e-23	3.61518e-22	[-1]	Group33	6.81818	3	[TUBA3C, TUBA3D, TUBA3E]
R-HSA:5618328	ATAT acetylates microtubules	REACTOME_Reactions_25.05.2022	8.44341e-05	0.0071769	1.06329e-23	3.61518e-22	[-1]	Group33	16.6667	3	[TUBA3C, TUBA3D, TUBA3E]
R-HSA:5618331	HDAC6 deacetylates microtubules	REACTOME_Reactions_25.05.2022	8.44341e-05	0.0071769	1.06329e-23	3.61518e-22	[-1]	Group33	16.6667	3	[TUBA3C, TUBA3D, TUBA3E]
R-HSA:5625959	Activated RHOA, RHOG, RAC1 and CDC42 bind KTN1 (kinectin)	REACTOME_Reactions_25.05.2022	1.08304e-06	0.00022094	1.06329e-23	3.61518e-22	[-1]	Group33	60	3	[CDC42, RAC1, RHOA]
R-HSA:5632732	p-S939,T1462-TSC2 binding to 14-3-3 dimer is negatively regulated by DDIT4	REACTOME_Reactions_25.05.2022	2.93156e-10	1.01432e-07	1.06329e-23	3.61518e-22	[-1]	Group33	55.5556	5	[SFN, YWHAB, YWHAG, YWHAH, YWHAZ]
R-HSA:5632738	DDIT4 binds 14-3-3 dimer	REACTOME_Reactions_25.05.2022	1.3079e-10	4.59074e-08	1.06329e-23	3.61518e-22	[-1]	Group33	62.5	5	[SFN, YWHAB, YWHAG, YWHAH, YWHAZ]
R-HSA:5654672	CBL ubiquitinates FRS2 and FGFR1	REACTOME_Reactions_25.05.2022	0.000180069	0.012965	1.06329e-23	3.61518e-22	[-1]	Group33	13.0435	3	[FGFR1, RPS27A, UBA52]
R-HSA:5654677	CBL ubiquitinates FRS2 and FGFR2	REACTOME_Reactions_25.05.2022	0.000232224	0.0153268	1.06329e-23	3.61518e-22	[-1]	Group33	12	3	[FGFR2, RPS27A, UBA52]
R-HSA:5654679	CBL ubiquitinates FRS2 and FGFR3	REACTOME_Reactions_25.05.2022	0.000117136	0.00901944	1.06329e-23	3.61518e-22	[-1]	Group33	15	3	[FGFR3, RPS27A, UBA52]
R-HSA:5654684	CBL ubiquitinates FRS2 and FGFR4	REACTOME_Reactions_25.05.2022	0.000157131	0.0114706	1.06329e-23	3.61518e-22	[-1]	Group33	13.6364	3	[FGFR4, RPS27A, UBA52]
R-HSA:5666169	Kinetochore capture of astral microtubules is positively regulated by CDC42:GTP:p-S196-DIAPH2-2	REACTOME_Reactions_25.05.2022	0.000238474	0.0155008	1.06329e-23	3.61518e-22	[-1]	Group33	4.34783	5	[CDC42, PPP2CA, TUBA3C, TUBA3D, TUBA3E]
R-HSA:5672083	KTN1 binds Kinesin-1	REACTOME_Reactions_25.05.2022	1.74975e-05	0.00220468	1.06329e-23	3.61518e-22	[-1]	Group33	27.2727	3	[CDC42, RAC1, RHOA]
R-HSA:5672329	IQGAP1 binds CLIP1 and microtubules	REACTOME_Reactions_25.05.2022	4.52226e-08	1.2391e-05	1.06329e-23	3.61518e-22	[-1]	Group33	23.8095	5	[CDC42, RAC1, TUBA3C, TUBA3D, TUBA3E]
R-HSA:5674022	BRAP autoubiquitinates	REACTOME_Reactions_25.05.2022	1.3079e-10	4.59074e-08	1.06329e-23	3.61518e-22	[-1]	Group33	62.5	5	[HRAS, KRAS, NRAS, RPS27A, UBA52]
R-HSA:5682858	RNF8 and RNF168 ubiquitinate H2AFX	REACTOME_Reactions_25.05.2022	0.000124656	0.00947388	1.06329e-23	3.61518e-22	[-1]	Group33	7.54717	4	[H2AX, H3-4, RPS27A, UBA52]
R-HSA:5683077	RNF8 and RNF168 ubiquitinate KDM4A,B	REACTOME_Reactions_25.05.2022	0.000124656	0.00947388	1.06329e-23	3.61518e-22	[-1]	Group33	7.54717	4	[H2AX, H3-4, RPS27A, UBA52]
R-HSA:5684071	RNF4 ubiquitinates MDC1	REACTOME_Reactions_25.05.2022	0.000202297	0.0141608	1.06329e-23	3.61518e-22	[-1]	Group33	6.66667	4	[H2AX, H3-4, RPS27A, UBA52]
R-HSA:6809003	ERGIC-to-Golgi vesicles bind dynein:dynactin	REACTOME_Reactions_25.05.2022	0.00531287	0.0106257	1.06329e-23	3.61518e-22	[-1]	Group33	4.10959	3	[TUBA3C, TUBA3D, TUBA3E]
R-HSA:75016	Association of p-S216-CDC25C with 14-3-3 proteins	REACTOME_Reactions_25.05.2022	1.3079e-10	4.59074e-08	1.06329e-23	3.61518e-22	[-1]	Group33	62.5	5	[SFN, YWHAB, YWHAG, YWHAH, YWHAZ]
R-HSA:879917	CBL, GRB2, FYN and PI3K p85 subunit are constitutively associated	REACTOME_Reactions_25.05.2022	3.52903e-07	8.29321e-05	1.06329e-23	3.61518e-22	[-1]	Group33	30.7692	4	[FYN, HCK, LYN, YES1]
R-HSA:8849350	RAB6:GTP displaces PAFAH1B1 from dynein:dynactin complex	REACTOME_Reactions_25.05.2022	0.00117008	0.0327622	1.06329e-23	3.61518e-22	[-1]	Group33	6.97674	3	[TUBA3C, TUBA3D, TUBA3E]
R-HSA:8849353	Dynein drives COPI-independent retrograde traffic from the Golgi to the ER	REACTOME_Reactions_25.05.2022	0.00133604	0.0334009	1.06329e-23	3.61518e-22	[-1]	Group33	6.66667	3	[TUBA3C, TUBA3D, TUBA3E]
R-HSA:8852280	GTSE1 binds microtubule lattice in interphase cells	REACTOME_Reactions_25.05.2022	8.44341e-05	0.0071769	1.06329e-23	3.61518e-22	[-1]	Group33	16.6667	3	[TUBA3C, TUBA3D, TUBA3E]
R-HSA:8852298	GTSE1 binds MAPRE1 (EB1) at microtubule plus ends	REACTOME_Reactions_25.05.2022	9.99147e-05	0.00819301	1.06329e-23	3.61518e-22	[-1]	Group33	15.7895	3	[TUBA3C, TUBA3D, TUBA3E]
R-HSA:8852306	Mitotic phosphorylation-induced dissociation of GTSE1 from microtubule plus ends	REACTOME_Reactions_25.05.2022	3.49206e-06	0.000600635	1.06329e-23	3.61518e-22	[-1]	Group33	18.1818	4	[CDK1, TUBA3C, TUBA3D, TUBA3E]
R-HSA:8865774	TTLLs polyglutamylate tubulin	REACTOME_Reactions_25.05.2022	0.000232224	0.0153268	1.06329e-23	3.61518e-22	[-1]	Group33	12	3	[TUBA3C, TUBA3D, TUBA3E]
R-HSA:8866105	CCPs deglutamylate tubulin	REACTOME_Reactions_25.05.2022	0.000180069	0.012965	1.06329e-23	3.61518e-22	[-1]	Group33	13.0435	3	[TUBA3C, TUBA3D, TUBA3E]
R-HSA:8867370	TTLL3, TTLL8, TTLL10 polyglycylate tubulin	REACTOME_Reactions_25.05.2022	9.99147e-05	0.00819301	1.06329e-23	3.61518e-22	[-1]	Group33	15.7895	3	[TUBA3C, TUBA3D, TUBA3E]
R-HSA:8942607	Tyrosine kinases phosphorylate Cip/Kip inhibitors bound to CDK4/6:CCND complexes	REACTOME_Reactions_25.05.2022	3.01168e-05	0.00334297	1.06329e-23	3.61518e-22	[-1]	Group33	23.0769	3	[CDK4, CDK6, LYN]
R-HSA:8955706	TTL ligates L-Tyr to the carboxy terminus of detyr-alpha tubulin:beta tubulin	REACTOME_Reactions_25.05.2022	4.75782e-05	0.00475782	1.06329e-23	3.61518e-22	[-1]	Group33	20	3	[TUBA3C, TUBA3D, TUBA3E]
R-HSA:8955712	SVBP:VASH1,VASH2 hydrolyzes the terminal L-Tyr residue from alphaY-beta tubulin dimer	REACTOME_Reactions_25.05.2022	7.06089e-05	0.00649602	1.06329e-23	3.61518e-22	[-1]	Group33	17.6471	3	[TUBA3C, TUBA3D, TUBA3E]
R-HSA:8955869	Polyglutamylase complex (TTLL1) polyglutamylates alpha subunits of tubulin	REACTOME_Reactions_25.05.2022	0.000157131	0.0114706	1.06329e-23	3.61518e-22	[-1]	Group33	13.6364	3	[TUBA3C, TUBA3D, TUBA3E]
R-HSA:9018017	RB1 binds and inhibits E2F1/2/3:DP1/2 complexes	REACTOME_Reactions_25.05.2022	7.06089e-05	0.00649602	1.06329e-23	3.61518e-22	[-1]	Group33	17.6471	3	[CDK2, CDK4, CDK6]
R-HSA:9029158	EPO:phospho-EPOR:phospho-JAK2:LYN:IRS2:phospho-CRKL:RAPGEF1:GRB2-1:SOS1,phospho-VAV1 mediates exchange of GTP for GDP bound to RAS	REACTOME_Reactions_25.05.2022	4.92236e-07	0.000111738	1.06329e-23	3.61518e-22	[-1]	Group33	28.5714	4	[HRAS, KRAS, LYN, NRAS]
R-HSA:912408	Telomeres cluster at the nuclear membrane	REACTOME_Reactions_25.05.2022	1.93647e-05	0.00238186	1.06329e-23	3.61518e-22	[-1]	Group33	7.35294	5	[H2AC6, H2AC7, H2AJ, H2AX, H3-4]
R-HSA:912458	Formation of meiotic heteroduplex	REACTOME_Reactions_25.05.2022	0.00133604	0.0334009	1.06329e-23	3.61518e-22	[-1]	Group33	6.66667	3	[CDK4, H2AX, H3-4]
R-HSA:912496	Formation of meiotic holliday junction	REACTOME_Reactions_25.05.2022	0.00142428	0.0341826	1.06329e-23	3.61518e-22	[-1]	Group33	6.52174	3	[CDK4, H2AX, H3-4]
R-HSA:912503	Formation of meiotic single-stranded DNA invasion complex	REACTOME_Reactions_25.05.2022	0.00125132	0.0337857	1.06329e-23	3.61518e-22	[-1]	Group33	6.81818	3	[CDK4, H2AX, H3-4]
R-HSA:912627	CBL ubiquitinates PI3K	REACTOME_Reactions_25.05.2022	1.28297e-10	4.51607e-08	1.06329e-23	3.61518e-22	[-1]	Group33	35.2941	6	[FYN, HCK, LYN, RPS27A, UBA52, YES1]
R-HSA:912629	CBL is tyrosine phosphorylated	REACTOME_Reactions_25.05.2022	3.52903e-07	8.29321e-05	1.06329e-23	3.61518e-22	[-1]	Group33	30.7692	4	[FYN, HCK, LYN, YES1]
R-HSA:9610408	GluN1:GluN2B (GRIN1:GRIN2B) di-heterotetramers bind LIN7:CASK:APBA1, DLG1 and KIF17	REACTOME_Reactions_25.05.2022	0.000261597	0.0164806	1.06329e-23	3.61518e-22	[-1]	Group33	11.5385	3	[TUBA3C, TUBA3D, TUBA3E]
R-HSA:9610627	KIF17 transports GluN1:GluN2B (GRIN1:GRIN2B) NMDA receptors to the plasma membrane	REACTOME_Reactions_25.05.2022	0.000261597	0.0164806	1.06329e-23	3.61518e-22	[-1]	Group33	11.5385	3	[TUBA3C, TUBA3D, TUBA3E]
R-HSA:9614343	Viral UL47:UL48 Proteins Bind HCMV Tegumented Virion to Host Microtuble and Dynein complexs	REACTOME_Reactions_25.05.2022	0.000205074	0.0141501	1.06329e-23	3.61518e-22	[-1]	Group33	12.5	3	[TUBA3C, TUBA3D, TUBA3E]
R-HSA:9614367	HCMV Nuclear Pore Docking	REACTOME_Reactions_25.05.2022	0.000124656	0.00947388	1.06329e-23	3.61518e-22	[-1]	Group33	7.54717	4	[TPR, TUBA3C, TUBA3D, TUBA3E]
R-HSA:9614423	14-3-3 proteins bind AKT-phosphorylated FOXO1	REACTOME_Reactions_25.05.2022	1.08304e-06	0.00022094	1.06329e-23	3.61518e-22	[-1]	Group33	60	3	[YWHAB, YWHAG, YWHAZ]
R-HSA:9619542	AMPK negatively regulates binding of MAPT to microtubules	REACTOME_Reactions_25.05.2022	0.000232224	0.0153268	1.06329e-23	3.61518e-22	[-1]	Group33	12	3	[TUBA3C, TUBA3D, TUBA3E]
R-HSA:9629195	NEIL3 recognizes and binds to 5-guanidinohydantoin (Gh) in telomeric DNA	REACTOME_Reactions_25.05.2022	5.64443e-06	0.00089182	1.06329e-23	3.61518e-22	[-1]	Group33	9.43396	5	[H2AC6, H2AC7, H2AJ, H2AX, H3-4]
R-HSA:9629216	NEIL3 cleaves 5-guanidinohydantoin (Gh) from damaged telomeric DNA	REACTOME_Reactions_25.05.2022	5.64443e-06	0.00089182	1.06329e-23	3.61518e-22	[-1]	Group33	9.43396	5	[H2AC6, H2AC7, H2AJ, H2AX, H3-4]
R-HSA:9629372	NEIL3 recognizes and binds to thymine glycol in telomeric DNA	REACTOME_Reactions_25.05.2022	5.64443e-06	0.00089182	1.06329e-23	3.61518e-22	[-1]	Group33	9.43396	5	[H2AC6, H2AC7, H2AJ, H2AX, H3-4]
R-HSA:9629373	NEIL3 recognizes and binds to spiroiminodihydantoin in telomeric DNA	REACTOME_Reactions_25.05.2022	5.64443e-06	0.00089182	1.06329e-23	3.61518e-22	[-1]	Group33	9.43396	5	[H2AC6, H2AC7, H2AJ, H2AX, H3-4]
R-HSA:9629483	NEIL3 cleaves spiroiminodihydantoin from damaged telomeric DNA	REACTOME_Reactions_25.05.2022	5.64443e-06	0.00089182	1.06329e-23	3.61518e-22	[-1]	Group33	9.43396	5	[H2AC6, H2AC7, H2AJ, H2AX, H3-4]
R-HSA:9629497	NEIL3 cleaves thymine glycol from telomeric DNA	REACTOME_Reactions_25.05.2022	5.64443e-06	0.00089182	1.06329e-23	3.61518e-22	[-1]	Group33	9.43396	5	[H2AC6, H2AC7, H2AJ, H2AX, H3-4]
R-HSA:9646383	Dynein motors transport misfolded proteins	REACTOME_Reactions_25.05.2022	6.83896e-07	0.000148405	1.06329e-23	3.61518e-22	[-1]	Group33	14.2857	5	[RPS27A, TUBA3C, TUBA3D, TUBA3E, UBA52]
R-HSA:9646390	Misfolded proteins:HDAC6:Dynein motor binds microtubule	REACTOME_Reactions_25.05.2022	6.83896e-07	0.000148405	1.06329e-23	3.61518e-22	[-1]	Group33	14.2857	5	[RPS27A, TUBA3C, TUBA3D, TUBA3E, UBA52]
[truncated: 522 more rows]
